# Supplementary material for: Production of recombinant human epidermal growth factor fused with HaloTag protein and characterisation of its biological functions
Source: PeerJ. 2024 Jul 16;12:e17806. doi: 10.7717/peerj.17806 (PMC11259126; doi:10.7717/peerj.17806)
Supplement: Supplemental Information 1 [file peerj-12-17806-s001.xlsx]

## Sheet: Sheet1
gene_id	baseMean	foldchange	log2FoldChange	lfcSE	stat	pvalue	padj	Chr	Start	End	Strand	GeneSymbol	Description	GO_BP	GO_CC	GO_MF	KO	Pathway
ENSG00000253671	167.369	0.327016	-1.61257	0.158472	-10.1757	2.54455e-24	1.1163e-22	8	17808361	17822183	+	-	novel transcript	-	-	-	-	-
ENSG00000278730	627.837	0.716741	-0.480477	0.077653	-6.18749	6.1131e-10	7.63615e-09	17	68126666	68129586	+	-	novel transcript	-	-	-	-	-
ENSG00000242588	1102.45	0.784518	-0.350122	0.0651307	-5.37569	7.62885e-08	7.18032e-07	7	128531707	128663479	+	-	novel transcript	-	-	-	-	-
ENSG00000124593	148.487	0.591209	-0.75826	0.149701	-5.06517	4.08037e-07	3.42062e-06	6	41780349	41790141	+	-	novel protein	GO:0030036:actin cytoskeleton organization;GO:0007507:heart development;GO:0061061:muscle structure development;	GO:0005912:adherens junction;GO:0031941:filamentous actin;GO:0005634:nucleus;GO:0001725:stress fiber;GO:0030018:Z disc;	GO:0003779:actin binding;GO:0051371:muscle alpha-actinin binding;GO:0008270:zinc ion binding;	K17772	-
ENSG00000260912	137.321	0.539023	-0.891581	0.178876	-4.98436	6.21679e-07	5.05373e-06	9	19453209	19455173	+	-	novel transcript%2C overlapping ACER2	-	-	-	-	-
ENSG00000264112	361.612	0.685087	-0.545642	0.11082	-4.92366	8.49394e-07	6.72805e-06	17	57989039	57994850	-	-	novel transcript	-	-	-	-	-
ENSG00000273151	179.469	0.63834	-0.647603	0.136508	-4.74408	2.09459e-06	1.55518e-05	7	879790	886547	-	-	novel transcript%2C antisense to GET4	-	-	-	-	-
ENSG00000270605	101.839	0.550783	-0.860444	0.185564	-4.63692	3.53647e-06	2.52407e-05	1	28239509	28241453	-	-	novel transcript	-	-	-	-	-
ENSG00000277287	109.759	0.558711	-0.839826	0.183972	-4.56495	4.99604e-06	3.47874e-05	20	3239705	3245382	+	-	novel transcript	-	-	-	-	-
ENSG00000276850	619.789	0.792282	-0.335914	0.0755707	-4.44503	8.78777e-06	5.85103e-05	10	47908064	47991877	-	-	novel transcript	-	-	-	-	-
ENSG00000285796	148.549	0.673428	-0.570404	0.146439	-3.89516	9.81322e-05	0.000533804	20	45926518	45935055	-	-	novel transcript	-	-	-	-	-
ENSG00000267002	363.176	0.776954	-0.364099	0.100611	-3.61889	0.000295874	0.00144764	17	43148368	43171037	-	-	novel transcript	-	-	-	-	-
ENSG00000279207	265.944	0.736515	-0.441213	0.122311	-3.60731	0.000309389	0.0015073	17	58095672	58101479	+	-	novel transcript	-	-	-	-	-
ENSG00000270504	120.608	0.657222	-0.605548	0.175044	-3.45941	0.000541359	0.00249095	6	3751111	3753871	+	-	novel transcript%2C antisense to PXDC1	-	-	-	-	-
ENSG00000170846	338.237	0.787404	-0.344824	0.100094	-3.44501	0.000571048	0.00260932	4	6663396	6676755	+	-	novel protein%2C similar to Morf4 family associated protein 1	GO:0051726:regulation of cell cycle;	-	-	-	-
ENSG00000261324	145.617	0.707592	-0.49901	0.15092	-3.30646	0.000944831	0.00410649	12	14762504	14767931	-	-	novel transcript%2C overlapping HIST4H4	-	-	-	-	-
ENSG00000259341	433.749	0.804895	-0.313128	0.0981427	-3.19053	0.0014201	0.00590628	15	99423769	99435160	-	-	novel transcript	-	-	-	-	-
ENSG00000277969	131.798	0.712666	-0.488702	0.163303	-2.99261	0.00276605	0.0106007	17	38702449	38704747	+	-	novel transcript	-	-	-	-	-
ENSG00000287769	125.151	0.7098	-0.494516	0.166616	-2.968	0.00299748	0.0113329	9	88384902	88389224	-	-	novel transcript%2C antisense to SPIN1	-	-	-	-	-
ENSG00000256433	153.685	0.744301	-0.426043	0.144567	-2.94703	0.00320845	0.0120333	12	6393879	6396148	+	-	novel transcript	-	-	-	-	-
ENSG00000281181	771.917	0.739373	-0.435625	0.153779	-2.8328	0.00461417	0.0165635	21	8437629	8438551	-	-	novel transcript%2C similar to YY1 associated myogenesis RNA 1 YAM1	-	-	-	-	-
ENSG00000258634	225.917	0.792964	-0.334673	0.120064	-2.78746	0.00531227	0.0187595	1	110058340	110062555	+	-	novel transcript%2C antisense to ALX3	-	-	-	-	-
ENSG00000280128	156.498	0.75924	-0.397373	0.145389	-2.73317	0.00627279	0.0215875	6	30282349	30286054	-	-	TEC	-	-	-	-	-
ENSG00000261786	277.495	0.813439	-0.297893	0.110797	-2.68864	0.00717436	0.0243097	3	44117299	44122365	+	-	novel transcript	-	-	-	-	-
ENSG00000197815	129.649	0.716817	-0.480322	0.179685	-2.67314	0.00751445	0.025279	17	17858227	17860041	+	-	novel transcript%2C antisense to TOM1L2	-	-	-	-	-
ENSG00000275764	189.679	0.788558	-0.342711	0.1289	-2.65872	0.00784373	0.0262085	12	27037100	27038960	+	-	novel transcript	-	-	-	-	-
ENSG00000288670	158.738	0.759313	-0.397234	0.151751	-2.61767	0.00885313	0.0290541	1	161368022	161371964	+	-	novel transcript	-	-	-	-	-
ENSG00000267317	111.19	0.736111	-0.442005	0.176487	-2.50447	0.0122636	0.0384422	19	1457670	1458580	-	-	novel transcript%2C antisense to APC2	-	-	-	-	-
ENSG00000260581	105.002	0.725411	-0.46313	0.190346	-2.43309	0.0149704	0.0456338	5	151652275	151655449	+	-	novel transcript%2C antisense to SPARC	-	-	-	-	-
ENSG00000260328	139.811	1.65478	0.726637	0.16997	4.27509	1.91058e-05	0.000119452	17	17011914	17014990	-	-	novel transcript	-	-	-	-	-
ENSG00000280385	145.455	1.46144	0.547393	0.152477	3.58999	0.000330686	0.0016025	11	90193614	90198120	+	-	novel transcript	-	-	-	-	-
ENSG00000287778	157.773	1.41257	0.498319	0.146221	3.40799	0.000654432	0.00294826	4	11426874	11467802	+	-	novel transcript%2C antisense to HS3ST1	-	-	-	-	-
ENSG00000286966	225.746	1.3244	0.405333	0.127418	3.18113	0.00146702	0.00607377	1	183613537	183619335	+	-	novel transcript	-	-	-	-	-
ENSG00000276672	157.17	1.40949	0.495178	0.156045	3.1733	0.00150715	0.00622029	13	33846190	33850825	+	-	novel transcript%2C sense intronic to RFC3	-	-	-	-	-
ENSG00000241494	201.726	1.30494	0.383988	0.125501	3.05963	0.00221609	0.00874646	14	101677943	101678380	+	-	ribosomal protein L26-like 1 (RPL26L1) pseudogene	GO:0071480:cellular response to gamma radiation;GO:0034644:cellular response to UV;GO:0002181:cytoplasmic translation;GO:0006977... <Preview truncated at 128 characters>	GO:0005737:cytoplasm;GO:0005829:cytosol;GO:0022625:cytosolic large ribosomal subunit;GO:0022626:cytosolic ribosome;GO:0070062:ex... <Preview truncated at 128 characters>	GO:0048027:mRNA 5-UTR binding;GO:0003723:RNA binding;GO:0003735:structural constituent of ribosome;	K02898	;ko03010 Ribosome;ko05171 Coronavirus disease - COVID-19;
ENSG00000289850	112.193	1.46144	0.547387	0.1798	3.04441	0.00233134	0.00913415	6	144922315	144929987	+	-	novel transcript	-	-	-	-	-
ENSG00000277534	127.081	1.39546	0.480743	0.161923	2.96895	0.00298816	0.0113047	18	26542971	26545791	-	-	novel transcript%2C sense intronic to KCTD1	-	-	-	-	-
ENSG00000250899	195.006	1.32533	0.40635	0.137099	2.96392	0.00303744	0.0114698	12	3041437	3044950	+	-	novel transcript	-	-	-	-	-
ENSG00000236814	131.241	1.35429	0.437541	0.152581	2.8676	0.00413602	0.0150213	8	56050038	56051207	-	-	proteasome (prosome%2C macropain) 26S subunit%2C ATPase%2C 6 (PSMC6) pseudogene	GO:0090261:positive regulation of inclusion body assembly;GO:1901800:positive regulation of proteasomal protein catabolic proces... <Preview truncated at 128 characters>	GO:0005829:cytosol;GO:0031597:cytosolic proteasome complex;GO:0070062:extracellular exosome;GO:0016234:inclusion body;GO:0016020... <Preview truncated at 128 characters>	GO:0005524:ATP binding;GO:0042802:identical protein binding;GO:0036402:proteasome-activating ATPase activity;GO:0030674:protein ... <Preview truncated at 128 characters>	K03064	;ko03050 Proteasome;ko05010 Alzheimer disease;ko05012 Parkinson disease;ko05014 Amyotrophic lateral sclerosis;ko05016 Huntington... <Preview truncated at 128 characters>
ENSG00000275464	114.853	1.41019	0.495885	0.178961	2.77092	0.00558984	0.0196182	21	5130871	5154658	-	-	novel protein%2C similar to PWP2 periodic tryptophan protein homolog (yeast) PWP2	-	-	-	-	-
ENSG00000256663	104.422	1.36149	0.445191	0.172463	2.58137	0.00984076	0.0318203	12	20551590	20553012	+	-	ubiquitin-like with PHD and ring finger domains 1 (UHRF1) pseudogene	GO:0007049:cell cycle;GO:0006281:DNA repair;GO:0010390:histone monoubiquitination;GO:0016574:histone ubiquitination;GO:0010216:m... <Preview truncated at 128 characters>	GO:0000785:chromatin;GO:0000791:euchromatin;GO:0000792:heterochromatin;GO:0016363:nuclear matrix;GO:0005654:nucleoplasm;GO:00056... <Preview truncated at 128 characters>	GO:0000987:core promoter proximal region sequence-specific DNA binding;GO:0044729:hemi-methylated DNA-binding;GO:0042393:histone... <Preview truncated at 128 characters>	K10638	-
ENSG00000109576	279.765	1.31454	0.394562	0.106812	3.694	0.000220755	0.00111078	4	170060222	170091699	-	AADAT	aminoadipate aminotransferase [Source:HGNC Symbol%3BAcc:HGNC:17929]	GO:0006103:2-oxoglutarate metabolic process;GO:1901605:alpha-amino acid metabolic process;GO:0009058:biosynthetic process;GO:000... <Preview truncated at 128 characters>	GO:0005759:mitochondrial matrix;	GO:0047536:2-aminoadipate transaminase activity;GO:0016212:kynurenine-oxoglutarate transaminase activity;GO:0042803:protein homo... <Preview truncated at 128 characters>	K00825	;ko00300 Lysine biosynthesis;ko00310 Lysine degradation;ko00380 Tryptophan metabolism;ko01100 Metabolic pathways;ko01210 2-Oxoca... <Preview truncated at 128 characters>
ENSG00000115977	1537.38	0.748291	-0.418329	0.0526081	-7.9518	1.83822e-15	4.16222e-14	2	69457997	69674349	-	AAK1	AP2 associated kinase 1 [Source:HGNC Symbol%3BAcc:HGNC:19679]	GO:0006897:endocytosis;GO:0061024:membrane organization;GO:0045747:positive regulation of Notch signaling pathway;GO:0046777:pro... <Preview truncated at 128 characters>	GO:0031252:cell leading edge;GO:0005905:coated pit;GO:0030136:clathrin-coated vesicle;GO:0005737:cytoplasm;GO:0005829:cytosol;GO... <Preview truncated at 128 characters>	GO:0035612:AP-2 adaptor complex binding;GO:0005524:ATP binding;GO:0005112:Notch binding;GO:0004674:protein serine/threonine kina... <Preview truncated at 128 characters>	K08853	-
ENSG00000131043	688.198	1.19563	0.257776	0.078147	3.2986	0.000971678	0.00421114	20	36236131	36270918	+	AAR2	AAR2 splicing factor [Source:HGNC Symbol%3BAcc:HGNC:15886]	GO:0000244:spliceosomal tri-snRNP complex assembly;	GO:0005681:spliceosomal complex;GO:0005682:U5 snRNP;	-	K13205	-
ENSG00000090861	5617.76	1.45256	0.538596	0.044521	12.0976	1.08772e-33	8.34069e-32	16	70251983	70289707	-	AARS1	alanyl-tRNA synthetase 1 [Source:HGNC Symbol%3BAcc:HGNC:20]	GO:0006419:alanyl-tRNA aminoacylation;GO:0021680:cerebellar Purkinje cell layer development;GO:0043524:negative regulation of ne... <Preview truncated at 128 characters>	GO:0005737:cytoplasm;GO:0005829:cytosol;GO:0070062:extracellular exosome;GO:0016020:membrane;GO:0005739:mitochondrion;GO:0016021... <Preview truncated at 128 characters>	GO:0004813:alanine-tRNA ligase activity;GO:0016597:amino acid binding;GO:0002161:aminoacyl-tRNA editing activity;GO:0005524:ATP ... <Preview truncated at 128 characters>	K01872	;ko00970 Aminoacyl-tRNA biosynthesis;
ENSG00000149313	1988.47	1.28482	0.36157	0.0554727	6.51797	7.12663e-11	9.92075e-10	11	106075501	106098699	+	AASDHPPT	aminoadipate-semialdehyde dehydrogenase-phosphopantetheinyl transferase [Source:HGNC Symbol%3BAcc:HGNC:14235]	GO:0019878:lysine biosynthetic process via aminoadipic acid;GO:0015939:pantothenate metabolic process;	GO:0005829:cytosol;GO:0070062:extracellular exosome;	GO:0008897:holo-[acyl-carrier-protein] synthase activity;GO:0000287:magnesium ion binding;	K06133	;ko00770 Pantothenate and CoA biosynthesis;
ENSG00000275700	2335.76	1.34742	0.430194	0.054174	7.94097	2.00603e-15	4.50862e-14	17	36948925	37056871	+	AATF	apoptosis antagonizing transcription factor [Source:HGNC Symbol%3BAcc:HGNC:19235]	GO:0007155:cell adhesion;GO:0006974:cellular response to DNA damage stimulus;GO:0040016:embryonic cleavage;GO:0042985:negative r... <Preview truncated at 128 characters>	GO:0005737:cytoplasm;GO:0005794:Golgi apparatus;GO:0005730:nucleolus;GO:0005654:nucleoplasm;GO:0005634:nucleus;	GO:0043522:leucine zipper domain binding;GO:0019901:protein kinase binding;GO:0003723:RNA binding;GO:0048156:tau protein binding... <Preview truncated at 128 characters>	K14782	-
ENSG00000183044	214.821	0.389762	-1.35933	0.130344	-10.4288	1.83182e-25	8.68329e-24	16	8674596	8784575	+	ABAT	4-aminobutyrate aminotransferase [Source:HGNC Symbol%3BAcc:HGNC:23]	GO:0007568:aging;GO:0048148:behavioral response to cocaine;GO:0021549:cerebellum development;GO:0007620:copulation;GO:0035640:ex... <Preview truncated at 128 characters>	GO:0032144:4-aminobutyrate transaminase complex;GO:0005759:mitochondrial matrix;GO:0005739:mitochondrion;GO:0043005:neuron proje... <Preview truncated at 128 characters>	GO:0047298:(S)-3-amino-2-methylpropionate transaminase activity;GO:0034386:4-aminobutyrate:2-oxoglutarate transaminase activity;... <Preview truncated at 128 characters>	K13524;K15040;K17985	;ko00250 Alanine, aspartate and glutamate metabolism;ko00280 Valine, leucine and isoleucine degradation;ko00410 beta-Alanine met... <Preview truncated at 128 characters>
ENSG00000107331	305.888	1.24474	0.315841	0.110511	2.858	0.00426319	0.0154371	9	137007234	137028915	-	ABCA2	ATP binding cassette subfamily A member 2 [Source:HGNC Symbol%3BAcc:HGNC:32]	GO:0090156:cellular sphingolipid homeostasis;GO:0032289:central nervous system myelin formation;GO:0042632:cholesterol homeostas... <Preview truncated at 128 characters>	GO:0043190:ATP-binding cassette (ABC) transporter complex;GO:0031410:cytoplasmic vesicle;GO:0005768:endosome;GO:0010008:endosome... <Preview truncated at 128 characters>	GO:0005524:ATP binding;GO:0042626:ATPase activity, coupled to transmembrane movement of substances;GO:0061135:endopeptidase regu... <Preview truncated at 128 characters>	K05642	;ko02010 ABC transporters;ko04142 Lysosome;
ENSG00000154265	304.64	0.608531	-0.716598	0.123782	-5.78918	7.07317e-09	7.75288e-08	17	69244311	69327244	-	ABCA5	ATP binding cassette subfamily A member 5 [Source:HGNC Symbol%3BAcc:HGNC:35]	GO:0033344:cholesterol efflux;GO:0042632:cholesterol homeostasis;GO:0008203:cholesterol metabolic process;GO:0034375:high-densit... <Preview truncated at 128 characters>	GO:0005794:Golgi apparatus;GO:0000139:Golgi membrane;GO:0016021:integral component of membrane;GO:0043231:intracellular membrane... <Preview truncated at 128 characters>	GO:0005524:ATP binding;GO:0042626:ATPase activity, coupled to transmembrane movement of substances;GO:0005319:lipid transporter ... <Preview truncated at 128 characters>	K05648	;ko02010 ABC transporters;
ENSG00000064687	225.094	0.713659	-0.486693	0.129196	-3.76708	0.000165167	0.000852461	19	1039997	1065572	+	ABCA7	ATP binding cassette subfamily A member 7 [Source:HGNC Symbol%3BAcc:HGNC:37]	GO:0034205:beta-amyloid formation;GO:0038027:apolipoprotein A-I-mediated signaling pathway;GO:0033344:cholesterol efflux;GO:0034... <Preview truncated at 128 characters>	GO:0030054:cell junction;GO:0009986:cell surface;GO:0031901:early endosome membrane;GO:0005783:endoplasmic reticulum;GO:0097386:... <Preview truncated at 128 characters>	GO:0034188:apolipoprotein A-I receptor activity;GO:0005524:ATP binding;GO:0042626:ATPase activity, coupled to transmembrane move... <Preview truncated at 128 characters>	K05645	;ko02010 ABC transporters;
ENSG00000135776	964.392	1.20066	0.263824	0.0658267	4.00786	6.12715e-05	0.0003477	1	229516582	229558707	-	ABCB10	ATP binding cassette subfamily B member 10 [Source:HGNC Symbol%3BAcc:HGNC:41]	GO:0048821:erythrocyte development;GO:0006783:heme biosynthetic process;GO:0006839:mitochondrial transport;GO:0034514:mitochondr... <Preview truncated at 128 characters>	GO:0032592:integral component of mitochondrial membrane;GO:0005743:mitochondrial inner membrane;GO:0005739:mitochondrion;	GO:0005524:ATP binding;GO:0042626:ATPase activity, coupled to transmembrane movement of substances;GO:0042803:protein homodimeri... <Preview truncated at 128 characters>	K05657	;ko02010 ABC transporters;
ENSG00000124574	380.824	0.803396	-0.315816	0.105224	-3.00137	0.00268769	0.0103494	6	43427366	43450427	+	ABCC10	ATP binding cassette subfamily C member 10 [Source:HGNC Symbol%3BAcc:HGNC:52]	GO:0006691:leukotriene metabolic process;GO:0071716:leukotriene transport;GO:0055085:transmembrane transport;	GO:0016323:basolateral plasma membrane;GO:0016021:integral component of membrane;GO:0005765:lysosomal membrane;GO:0016020:membra... <Preview truncated at 128 characters>	GO:0015431:glutathione S-conjugate-exporting ATPase activity;GO:0008559:xenobiotic-transporting ATPase activity;GO:0005524:ATP b... <Preview truncated at 128 characters>	K05674	;ko02010 ABC transporters;
ENSG00000023839	144.334	1.38719	0.472167	0.146535	3.22222	0.00127202	0.00535389	10	99782640	99852594	+	ABCC2	ATP binding cassette subfamily C member 2 [Source:HGNC Symbol%3BAcc:HGNC:53]	GO:1901086:benzylpenicillin metabolic process;GO:0015721:bile acid and bile salt transport;GO:0038183:bile acid signaling pathwa... <Preview truncated at 128 characters>	GO:0016324:apical plasma membrane;GO:0031526:brush border membrane;GO:0009986:cell surface;GO:0005887:integral component of plas... <Preview truncated at 128 characters>	GO:0015431:glutathione S-conjugate-exporting ATPase activity;GO:0008559:xenobiotic-transporting ATPase activity;GO:0005524:ATP b... <Preview truncated at 128 characters>	K05666	;ko01523 Antifolate resistance;ko01524 Platinum drug resistance;ko02010 ABC transporters;ko04976 Bile secretion;
ENSG00000108846	785.263	1.5808	0.660656	0.0823981	8.01785	1.07613e-15	2.51464e-14	17	50634777	50692253	+	ABCC3	ATP binding cassette subfamily C member 3 [Source:HGNC Symbol%3BAcc:HGNC:54]	GO:0015721:bile acid and bile salt transport;GO:0006855:drug transmembrane transport;GO:0071716:leukotriene transport;GO:0055085... <Preview truncated at 128 characters>	GO:0016323:basolateral plasma membrane;GO:0016021:integral component of membrane;GO:0016020:membrane;GO:0005886:plasma membrane;... <Preview truncated at 128 characters>	GO:0015432:bile acid-exporting ATPase activity;GO:0015431:glutathione S-conjugate-exporting ATPase activity;GO:0008559:xenobioti... <Preview truncated at 128 characters>	K05667	;ko01523 Antifolate resistance;ko02010 ABC transporters;ko04976 Bile secretion;
ENSG00000125257	1183.96	1.34171	0.424069	0.061467	6.89913	5.23209e-12	8.38329e-11	13	95019835	95301475	-	ABCC4	ATP binding cassette subfamily C member 4 [Source:HGNC Symbol%3BAcc:HGNC:55]	GO:0015721:bile acid and bile salt transport;GO:0038183:bile acid signaling pathway;GO:0070730:cAMP transport;GO:0060271:cilium ... <Preview truncated at 128 characters>	GO:0016324:apical plasma membrane;GO:0016323:basolateral plasma membrane;GO:0098591:external side of apical plasma membrane;GO:0... <Preview truncated at 128 characters>	GO:0016404:15-hydroxyprostaglandin dehydrogenase (NAD+) activity;GO:0015432:bile acid-exporting ATPase activity;GO:0015431:gluta... <Preview truncated at 128 characters>	K05673	;ko01523 Antifolate resistance;ko02010 ABC transporters;ko04024 cAMP signaling pathway;ko04976 Bile secretion;
ENSG00000114770	3404.55	0.685781	-0.544179	0.0460233	-11.824	2.93402e-32	2.05946e-30	3	183919934	184017939	-	ABCC5	ATP binding cassette subfamily C member 5 [Source:HGNC Symbol%3BAcc:HGNC:56]	GO:0070730:cAMP transport;GO:0070731:cGMP transport;GO:0034775:glutathione transmembrane transport;GO:0035351:heme transmembrane... <Preview truncated at 128 characters>	GO:0016324:apical plasma membrane;GO:0016323:basolateral plasma membrane;GO:0010008:endosome membrane;GO:0005796:Golgi lumen;GO:... <Preview truncated at 128 characters>	GO:0008559:xenobiotic-transporting ATPase activity;GO:0005524:ATP binding;GO:0042626:ATPase activity, coupled to transmembrane m... <Preview truncated at 128 characters>	K05668	;ko01523 Antifolate resistance;ko02010 ABC transporters;
ENSG00000119688	490.003	0.83073	-0.267549	0.0858586	-3.11616	0.00183226	0.00739468	14	74285269	74303055	-	ABCD4	ATP binding cassette subfamily D member 4 [Source:HGNC Symbol%3BAcc:HGNC:68]	GO:0009235:cobalamin metabolic process;GO:0015889:cobalamin transport;GO:0006635:fatty acid beta-oxidation;GO:0015910:peroxisoma... <Preview truncated at 128 characters>	GO:0043190:ATP-binding cassette (ABC) transporter complex;GO:0005789:endoplasmic reticulum membrane;GO:0016021:integral componen... <Preview truncated at 128 characters>	GO:0015420:cobalamin-transporting ATPase activity;GO:0005524:ATP binding;GO:0042626:ATPase activity, coupled to transmembrane mo... <Preview truncated at 128 characters>	K05678	;ko02010 ABC transporters;ko04146 Peroxisome;
ENSG00000164163	4916.16	1.58024	0.660144	0.0497986	13.2563	4.14896e-40	4.20658e-38	4	145098288	145129524	+	ABCE1	ATP binding cassette subfamily E member 1 [Source:HGNC Symbol%3BAcc:HGNC:69]	GO:0060702:negative regulation of endoribonuclease activity;GO:0006417:regulation of translation;GO:0000054:ribosomal subunit ex... <Preview truncated at 128 characters>	GO:0005737:cytoplasm;GO:0005829:cytosol;GO:0016020:membrane;GO:0005759:mitochondrial matrix;GO:0005739:mitochondrion;	GO:0051539:4 iron, 4 sulfur cluster binding;GO:0005524:ATP binding;GO:0042626:ATPase activity, coupled to transmembrane movement... <Preview truncated at 128 characters>	K06174	-
ENSG00000033050	312.542	1.66142	0.732413	0.116248	6.30043	2.96822e-10	3.86929e-09	7	151211484	151227205	-	ABCF2	ATP binding cassette subfamily F member 2 [Source:HGNC Symbol%3BAcc:HGNC:71]	-	GO:0016020:membrane;GO:0005739:mitochondrion;	GO:0005524:ATP binding;GO:0042626:ATPase activity, coupled to transmembrane movement of substances;	K06185	;ko05130 Pathogenic Escherichia coli infection;
ENSG00000144827	995.632	1.20151	0.26485	0.0618277	4.28367	1.83831e-05	0.000115369	3	111979010	111993368	+	ABHD10	abhydrolase domain containing 10%2C depalmitoylase [Source:HGNC Symbol%3BAcc:HGNC:25656]	GO:0052695:cellular glucuronidation;GO:0019391:glucuronoside catabolic process;GO:0002084:protein depalmitoylation;	GO:0005829:cytosol;GO:0005759:mitochondrial matrix;GO:0005739:mitochondrion;	GO:0004553:hydrolase activity, hydrolyzing O-glycosyl compounds;GO:0008474:palmitoyl-(protein) hydrolase activity;	K13702	-
ENSG00000106077	169.185	1.27147	0.346502	0.13717	2.52607	0.0115346	0.0364893	7	73736094	73738852	-	ABHD11	abhydrolase domain containing 11 [Source:HGNC Symbol%3BAcc:HGNC:16407]	-	GO:0005739:mitochondrion;	GO:0016787:hydrolase activity;	K13703	-
ENSG00000100439	798.134	0.768646	-0.379609	0.0664957	-5.70877	1.13793e-08	1.21162e-07	14	22598290	22612963	+	ABHD4	abhydrolase domain containing 4%2C N-acyl phospholipase B [Source:HGNC Symbol%3BAcc:HGNC:20154]	GO:0016042:lipid catabolic process;GO:0055088:lipid homeostasis;GO:0070292:N-acylphosphatidylethanolamine metabolic process;GO:0... <Preview truncated at 128 characters>	GO:0005789:endoplasmic reticulum membrane;GO:0005811:lipid particle;GO:0005739:mitochondrion;	GO:0052689:carboxylic ester hydrolase activity;GO:0016787:hydrolase activity;GO:0042171:lysophosphatidic acid acyltransferase ac... <Preview truncated at 128 characters>	K13698	-
ENSG00000143322	1193.11	1.24705	0.318525	0.0669826	4.75533	1.98119e-06	1.47759e-05	1	179099330	179229684	-	ABL2	ABL proto-oncogene 2%2C non-receptor tyrosine kinase [Source:HGNC Symbol%3BAcc:HGNC:77]	GO:0007155:cell adhesion;GO:0006464:cellular protein modification process;GO:0071300:cellular response to retinoic acid;GO:00356... <Preview truncated at 128 characters>	GO:0015629:actin cytoskeleton;GO:0005829:cytosol;	GO:0051015:actin filament binding;GO:0003785:actin monomer binding;GO:0005524:ATP binding;GO:0000287:magnesium ion binding;GO:00... <Preview truncated at 128 characters>	K08887	;ko04012 ErbB signaling pathway;ko04014 Ras signaling pathway;ko05416 Viral myocarditis;
ENSG00000175164	548.478	0.692027	-0.5311	0.0839632	-6.32539	2.52591e-10	3.31879e-09	9	133233278	133276024	-	ABO	ABO%2C alpha 1-3-N-acetylgalactosaminyltransferase and alpha 1-3-galactosyltransferase [Source:HGNC Symbol%3BAcc:HGNC:79]	GO:0005975:carbohydrate metabolic process;GO:0030259:lipid glycosylation;GO:0006486:protein glycosylation;GO:0006310:DNA recombi... <Preview truncated at 128 characters>	GO:0005576:extracellular region;GO:0005794:Golgi apparatus;GO:0032580:Golgi cisterna membrane;GO:0000139:Golgi membrane;GO:00160... <Preview truncated at 128 characters>	GO:0003823:antigen binding;GO:0004381:fucosylgalactoside 3-alpha-galactosyltransferase activity;GO:0004380:glycoprotein-fucosylg... <Preview truncated at 128 characters>	K00709	;ko00601 Glycosphingolipid biosynthesis - lacto and neolacto series;ko01100 Metabolic pathways;
ENSG00000146109	516.855	1.23599	0.305662	0.0818898	3.7326	0.000189511	0.000966893	6	26596953	26600739	+	ABT1	activator of basal transcription 1 [Source:HGNC Symbol%3BAcc:HGNC:17369]	GO:0000480:endonucleolytic cleavage in 5-ETS of tricistronic rRNA transcript (SSU-rRNA, 5.8S rRNA, LSU-rRNA);GO:0000447:endonuc... <Preview truncated at 128 characters>	GO:0005730:nucleolus;GO:0005634:nucleus;	GO:0003677:DNA binding;GO:0003723:RNA binding;GO:0003713:transcription coactivator activity;	K14785	-
ENSG00000076555	178.344	0.709648	-0.494823	0.1396	-3.54458	0.000393247	0.00187627	12	109116587	109268226	+	ACACB	acetyl-CoA carboxylase beta [Source:HGNC Symbol%3BAcc:HGNC:85]	GO:0006084:acetyl-CoA metabolic process;GO:0097009:energy homeostasis;GO:0006633:fatty acid biosynthetic process;GO:2001295:malo... <Preview truncated at 128 characters>	GO:0005829:cytosol;GO:0005741:mitochondrial outer membrane;GO:0005739:mitochondrion;GO:0005634:nucleus;	GO:0003989:acetyl-CoA carboxylase activity;GO:0005524:ATP binding;GO:0009374:biotin binding;GO:0042802:identical protein binding... <Preview truncated at 128 characters>	K01946	;ko00061 Fatty acid biosynthesis;ko00620 Pyruvate metabolism;ko00640 Propanoate metabolism;ko01100 Metabolic pathways;ko04152 AM... <Preview truncated at 128 characters>
ENSG00000151498	435.636	1.25353	0.325995	0.0912918	3.57091	0.000355738	0.00171344	11	134253548	134265855	+	ACAD8	acyl-CoA dehydrogenase family member 8 [Source:HGNC Symbol%3BAcc:HGNC:87]	GO:0009083:branched-chain amino acid catabolic process;GO:0006629:lipid metabolic process;GO:0006574:valine catabolic process;	GO:0005759:mitochondrial matrix;GO:0005739:mitochondrion;	GO:0003995:acyl-CoA dehydrogenase activity;GO:0050660:flavin adenine dinucleotide binding;	K11538	;ko00280 Valine, leucine and isoleucine degradation;ko01100 Metabolic pathways;
ENSG00000196177	427.394	0.719973	-0.473985	0.0885652	-5.35182	8.70743e-08	8.12011e-07	10	123008979	123058290	+	ACADSB	acyl-CoA dehydrogenase short/branched chain [Source:HGNC Symbol%3BAcc:HGNC:91]	GO:0006631:fatty acid metabolic process;GO:0006550:isoleucine catabolic process;	GO:0005759:mitochondrial matrix;GO:0005739:mitochondrion;	GO:0003853:2-methylacyl-CoA dehydrogenase activity;GO:0050660:flavin adenine dinucleotide binding;GO:0042802:identical protein b... <Preview truncated at 128 characters>	K09478	;ko00071 Fatty acid degradation;ko00280 Valine, leucine and isoleucine degradation;ko01100 Metabolic pathways;ko01212 Fatty acid... <Preview truncated at 128 characters>
ENSG00000120437	2326.22	1.21885	0.285517	0.0454377	6.2837	3.30598e-10	4.28509e-09	6	159762045	159779112	+	ACAT2	acetyl-CoA acetyltransferase 2 [Source:HGNC Symbol%3BAcc:HGNC:94]	GO:0006635:fatty acid beta-oxidation;GO:0006629:lipid metabolic process;	GO:0005737:cytoplasm;GO:0005829:cytosol;GO:0070062:extracellular exosome;GO:0005739:mitochondrion;	GO:0003985:acetyl-CoA C-acetyltransferase activity;	K00626	;ko00071 Fatty acid degradation;ko00072 Synthesis and degradation of ketone bodies;ko00280 Valine, leucine and isoleucine degrad... <Preview truncated at 128 characters>
ENSG00000110455	322.195	0.713521	-0.486972	0.112869	-4.31449	1.59974e-05	0.000101584	11	44065925	44084237	+	ACCS	1-aminocyclopropane-1-carboxylate synthase homolog (inactive) [Source:HGNC Symbol%3BAcc:HGNC:23989]	GO:0042218:1-aminocyclopropane-1-carboxylate biosynthetic process;	-	GO:0003824:catalytic activity;GO:0042802:identical protein binding;GO:0030170:pyridoxal phosphate binding;	-	-
ENSG00000102977	327.496	1.20558	0.269728	0.109214	2.46972	0.0135218	0.0418827	16	67657512	67660810	-	ACD	ACD shelterin complex subunit and telomerase recruitment factor [Source:HGNC Symbol%3BAcc:HGNC:25070]	GO:0030326:embryonic limb morphogenesis;GO:0070200:establishment of protein localization to telomere;GO:0006886:intracellular pr... <Preview truncated at 128 characters>	GO:0000781:chromosome, telomeric region;GO:0016604:nuclear body;GO:0000783:nuclear telomere cap complex;GO:0005654:nucleoplasm;G... <Preview truncated at 128 characters>	GO:0070182:DNA polymerase binding;GO:0044877:macromolecular complex binding;GO:0042162:telomeric DNA binding;	K11114	-
ENSG00000177076	164.009	0.471133	-1.08579	0.159625	-6.80215	1.03067e-11	1.59405e-10	9	19409009	19452505	+	ACER2	alkaline ceramidase 2 [Source:HGNC Symbol%3BAcc:HGNC:23675]	GO:0006919:activation of cysteine-type endopeptidase activity involved in apoptotic process;GO:0006974:cellular response to DNA ... <Preview truncated at 128 characters>	GO:0005794:Golgi apparatus;GO:0000139:Golgi membrane;GO:0030173:integral component of Golgi membrane;	GO:0071633:dihydroceramidase activity;GO:0046872:metal ion binding;GO:0017040:ceramidase activity;	K01441	;ko00600 Sphingolipid metabolism;ko01100 Metabolic pathways;ko04071 Sphingolipid signaling pathway;
ENSG00000078124	1443.71	1.84291	0.881983	0.0581117	15.1774	4.99366e-52	8.93473e-50	11	76860859	77026797	+	ACER3	alkaline ceramidase 3 [Source:HGNC Symbol%3BAcc:HGNC:16066]	GO:0046514:ceramide catabolic process;GO:0006954:inflammatory response;GO:0042552:myelination;GO:0071602:phytosphingosine biosyn... <Preview truncated at 128 characters>	GO:0005789:endoplasmic reticulum membrane;GO:0030176:integral component of endoplasmic reticulum membrane;GO:0030173:integral co... <Preview truncated at 128 characters>	GO:0005509:calcium ion binding;GO:0071633:dihydroceramidase activity;GO:0017040:ceramidase activity;GO:0070774:phytoceramidase a... <Preview truncated at 128 characters>	K04711;K17985	;ko00600 Sphingolipid metabolism;ko01100 Metabolic pathways;;ko04137 Mitophagy - animal;ko04140 Autophagy - animal;ko05010 Alzhe... <Preview truncated at 128 characters>
ENSG00000144476	128.19	0.494126	-1.01705	0.164017	-6.20089	5.61434e-10	7.05173e-09	2	236567787	236582354	+	ACKR3	atypical chemokine receptor 3 [Source:HGNC Symbol%3BAcc:HGNC:23692]	GO:0001525:angiogenesis;GO:0019722:calcium-mediated signaling;GO:0007155:cell adhesion;GO:0060326:cell chemotaxis;GO:0070098:che... <Preview truncated at 128 characters>	GO:0009986:cell surface;GO:0005905:coated pit;GO:0005769:early endosome;GO:0005768:endosome;GO:0009897:external side of plasma m... <Preview truncated at 128 characters>	GO:0019957:C-C chemokine binding;GO:0016493:C-C chemokine receptor activity;GO:0019958:C-X-C chemokine binding;GO:0016494:C-X-C ... <Preview truncated at 128 characters>	K04304	;ko04060 Cytokine-cytokine receptor interaction;ko04061 Viral protein interaction with cytokine and cytokine receptor;
ENSG00000097021	915.13	1.53577	0.618965	0.0708458	8.73679	2.39828e-18	7.04807e-17	1	6264269	6393767	-	ACOT7	acyl-CoA thioesterase 7 [Source:HGNC Symbol%3BAcc:HGNC:24157]	GO:0006637:acyl-CoA metabolic process;GO:0015937:coenzyme A biosynthetic process;GO:0006631:fatty acid metabolic process;GO:0036... <Preview truncated at 128 characters>	GO:0005829:cytosol;GO:0070062:extracellular exosome;GO:0005739:mitochondrion;GO:0005654:nucleoplasm;GO:0044297:cell body;GO:0005... <Preview truncated at 128 characters>	GO:0047617:acyl-CoA hydrolase activity;GO:0052689:carboxylic ester hydrolase activity;GO:0000062:fatty-acyl-CoA binding;GO:00360... <Preview truncated at 128 characters>	K17360	;ko00062 Fatty acid elongation;ko01040 Biosynthesis of unsaturated fatty acids;
ENSG00000134575	285.871	0.774549	-0.368572	0.114345	-3.22333	0.00126708	0.00533552	11	47239302	47248906	-	ACP2	acid phosphatase 2%2C lysosomal [Source:HGNC Symbol%3BAcc:HGNC:123]	GO:0016311:dephosphorylation;GO:0007040:lysosome organization;	GO:0070062:extracellular exosome;GO:0016021:integral component of membrane;GO:0043202:lysosomal lumen;GO:0005765:lysosomal membr... <Preview truncated at 128 characters>	GO:0003993:acid phosphatase activity;GO:0016791:phosphatase activity;	K14410	;ko00740 Riboflavin metabolism;ko01100 Metabolic pathways;ko04142 Lysosome;
ENSG00000167107	231.177	0.610237	-0.712559	0.123957	-5.74844	9.00701e-09	9.74381e-08	17	50426158	50474845	+	ACSF2	acyl-CoA synthetase family member 2 [Source:HGNC Symbol%3BAcc:HGNC:26101]	GO:0006637:acyl-CoA metabolic process;GO:0006631:fatty acid metabolic process;	GO:0005759:mitochondrial matrix;GO:0005739:mitochondrion;	GO:0005524:ATP binding;GO:0047760:butyrate-CoA ligase activity;GO:0004467:long-chain fatty acid-CoA ligase activity;GO:0031956:m... <Preview truncated at 128 characters>	K00666;K06248	-;ko04151 PI3K-Akt signaling pathway;ko04510 Focal adhesion;ko04512 ECM-receptor interaction;ko05165 Human papillomavirus infect... <Preview truncated at 128 characters>
ENSG00000151726	2708.86	0.751941	-0.41131	0.0456423	-9.01158	2.03101e-19	6.56035e-18	4	184755595	184826818	-	ACSL1	acyl-CoA synthetase long chain family member 1 [Source:HGNC Symbol%3BAcc:HGNC:3569]	GO:0033211:adiponectin-activated signaling pathway;GO:0015908:fatty acid transport;GO:0008610:lipid biosynthetic process;GO:0044... <Preview truncated at 128 characters>	GO:0005783:endoplasmic reticulum;GO:0005789:endoplasmic reticulum membrane;GO:0016021:integral component of membrane;GO:0016020:... <Preview truncated at 128 characters>	GO:0047676:arachidonate-CoA ligase activity;GO:0005524:ATP binding;GO:0004467:long-chain fatty acid-CoA ligase activity;GO:00904... <Preview truncated at 128 characters>	K01897	;ko00061 Fatty acid biosynthesis;ko00071 Fatty acid degradation;ko01100 Metabolic pathways;ko01212 Fatty acid metabolism;ko03320... <Preview truncated at 128 characters>
ENSG00000123983	10065.5	0.817995	-0.289836	0.0461084	-6.28596	3.25832e-10	4.23234e-09	2	222860942	222944639	+	ACSL3	acyl-CoA synthetase long chain family member 3 [Source:HGNC Symbol%3BAcc:HGNC:3570]	GO:0007420:brain development;GO:0006633:fatty acid biosynthetic process;GO:0006631:fatty acid metabolic process;GO:0044539:long-... <Preview truncated at 128 characters>	GO:0005783:endoplasmic reticulum;GO:0005789:endoplasmic reticulum membrane;GO:0005794:Golgi apparatus;GO:0016021:integral compon... <Preview truncated at 128 characters>	GO:0047676:arachidonate-CoA ligase activity;GO:0005524:ATP binding;GO:0004467:long-chain fatty acid-CoA ligase activity;GO:00904... <Preview truncated at 128 characters>	K01897	;ko00061 Fatty acid biosynthesis;ko00071 Fatty acid degradation;ko01100 Metabolic pathways;ko01212 Fatty acid metabolism;ko03320... <Preview truncated at 128 characters>
ENSG00000068366	2813.23	1.25848	0.331681	0.0916067	3.62071	0.000293794	0.00143901	X	109624244	109733403	-	ACSL4	acyl-CoA synthetase long chain family member 4 [Source:HGNC Symbol%3BAcc:HGNC:3571]	GO:0060996:dendritic spine development;GO:0060136:embryonic process involved in female pregnancy;GO:0006631:fatty acid metabolic... <Preview truncated at 128 characters>	GO:0005737:cytoplasm;GO:0005783:endoplasmic reticulum;GO:0005789:endoplasmic reticulum membrane;GO:0070062:extracellular exosome... <Preview truncated at 128 characters>	GO:0047676:arachidonate-CoA ligase activity;GO:0005524:ATP binding;GO:0004467:long-chain fatty acid-CoA ligase activity;GO:00904... <Preview truncated at 128 characters>	K01897	;ko00061 Fatty acid biosynthesis;ko00071 Fatty acid degradation;ko01100 Metabolic pathways;ko01212 Fatty acid metabolism;ko03320... <Preview truncated at 128 characters>
ENSG00000075624	33123.8	1.32636	0.407476	0.0461114	8.83678	9.85189e-19	2.98666e-17	7	5526409	5563902	-	ACTB	actin beta [Source:HGNC Symbol%3BAcc:HGNC:132]	GO:0007409:axonogenesis;GO:0048870:cell motility;GO:0001895:retina homeostasis;	GO:0015629:actin cytoskeleton;GO:0005856:cytoskeleton;GO:0005829:cytosol;GO:0097433:dense body;GO:0005925:focal adhesion;GO:0005... <Preview truncated at 128 characters>	GO:0005524:ATP binding;GO:0019901:protein kinase binding;	K05692;K16467	-
ENSG00000136518	2479.9	1.19136	0.25261	0.050608	4.99151	5.99081e-07	4.88309e-06	3	179562886	179588407	+	ACTL6A	actin like 6A [Source:HGNC Symbol%3BAcc:HGNC:24124]	GO:0043044:ATP-dependent chromatin remodeling;GO:0001825:blastocyst formation;GO:0006338:chromatin remodeling;GO:0006310:DNA rec... <Preview truncated at 128 characters>	GO:0000785:chromatin;GO:0031011:Ino80 complex;GO:0071564:npBAF complex;GO:0035267:NuA4 histone acetyltransferase complex;GO:0005... <Preview truncated at 128 characters>	GO:0003682:chromatin binding;GO:0003713:transcription coactivator activity;	K11340	;ko04714 Thermogenesis;ko05225 Hepatocellular carcinoma;
ENSG00000072110	4552.23	1.80642	0.853131	0.0470083	18.1485	1.31942e-73	6.17421e-71	14	68874128	68979440	-	ACTN1	actinin alpha 1 [Source:HGNC Symbol%3BAcc:HGNC:163]	GO:0045214:sarcomere organization;GO:0048741:skeletal muscle fiber development;GO:0051017:actin filament bundle assembly;GO:0051... <Preview truncated at 128 characters>	GO:0005923:bicellular tight junction;GO:0031252:cell leading edge;GO:0097433:dense body;GO:0005925:focal adhesion;GO:0090637:inn... <Preview truncated at 128 characters>	GO:0003779:actin binding;GO:0051393:alpha-actinin binding;GO:0005509:calcium ion binding;GO:0030274:LIM domain binding;GO:005121... <Preview truncated at 128 characters>	K05699	;ko04510 Focal adhesion;ko04520 Adherens junction;ko04530 Tight junction;ko04670 Leukocyte transendothelial migration;ko04810 Re... <Preview truncated at 128 characters>
ENSG00000133627	179.534	1.69517	0.761433	0.144305	5.27656	1.31631e-07	1.19338e-06	7	152759749	152855378	+	ACTR3B	actin related protein 3B [Source:HGNC Symbol%3BAcc:HGNC:17256]	-	GO:0042995:cell projection;GO:0005737:cytoplasm;GO:0005856:cytoskeleton;GO:0070062:extracellular exosome;	GO:0003779:actin binding;GO:0005524:ATP binding;	K18584	;ko04144 Endocytosis;ko04530 Tight junction;ko04666 Fc gamma R-mediated phagocytosis;ko04810 Regulation of actin cytoskeleton;ko... <Preview truncated at 128 characters>
ENSG00000101442	282.244	1.2717	0.346761	0.107218	3.23416	0.00122	0.00516348	20	38748460	38772520	+	ACTR5	actin related protein 5 [Source:HGNC Symbol%3BAcc:HGNC:14671]	GO:0043044:ATP-dependent chromatin remodeling;GO:0006310:DNA recombination;GO:0006302:double-strand break repair;GO:0006355:regu... <Preview truncated at 128 characters>	GO:0005737:cytoplasm;GO:0031011:Ino80 complex;GO:0005654:nucleoplasm;GO:0005634:nucleus;	-	K11672	-
ENSG00000115170	565.943	0.805063	-0.312826	0.0836991	-3.73751	0.000185852	0.000949286	2	157736251	157876330	-	ACVR1	activin A receptor type 1 [Source:HGNC Symbol%3BAcc:HGNC:171]	GO:0032924:activin receptor signaling pathway;GO:0002526:acute inflammatory response;GO:0001525:angiogenesis;GO:0003289:atrial s... <Preview truncated at 128 characters>	GO:0048179:activin receptor complex;GO:0045177:apical part of cell;GO:0070724:BMP receptor complex;GO:0005887:integral component... <Preview truncated at 128 characters>	GO:0048185:activin binding;GO:0016361:activin receptor activity, type I;GO:0005524:ATP binding;GO:0045296:cadherin binding;	K04675	;ko04060 Cytokine-cytokine receptor interaction;ko04350 TGF-beta signaling pathway;ko04550 Signaling pathways regulating pluripo... <Preview truncated at 128 characters>
ENSG00000119640	337.768	1.35688	0.440291	0.100221	4.39321	1.11687e-05	7.31554e-05	14	75053237	75069483	-	ACYP1	acylphosphatase 1 [Source:HGNC Symbol%3BAcc:HGNC:179]	GO:0006796:phosphate-containing compound metabolic process;	-	GO:0003998:acylphosphatase activity;	K01512	;ko00620 Pyruvate metabolism;ko01100 Metabolic pathways;
ENSG00000135074	499.595	2.84104	1.50642	0.0958017	15.7243	1.03051e-55	2.18748e-53	5	157395534	157575775	-	ADAM19	ADAM metallopeptidase domain 19 [Source:HGNC Symbol%3BAcc:HGNC:197]	GO:0042987:amyloid precursor protein catabolic process;GO:0006509:membrane protein ectodomain proteolysis;GO:0001890:placenta de... <Preview truncated at 128 characters>	GO:0005794:Golgi apparatus;GO:0016021:integral component of membrane;GO:0005634:nucleus;GO:0005886:plasma membrane;	GO:0046872:metal ion binding;GO:0004222:metalloendopeptidase activity;GO:1902945:metalloendopeptidase activity involved in amylo... <Preview truncated at 128 characters>	K08608	-
ENSG00000151651	456.556	2.14921	1.10381	0.101344	10.8917	1.26238e-27	6.75614e-26	10	133262420	133276868	-	ADAM8	ADAM metallopeptidase domain 8 [Source:HGNC Symbol%3BAcc:HGNC:215]	GO:0001525:angiogenesis;GO:0000902:cell morphogenesis;GO:0098609:cell-cell adhesion;GO:0071456:cellular response to hypoxia;GO:0... <Preview truncated at 128 characters>	GO:0071133:alpha9-beta1 integrin-ADAM8 complex;GO:0009986:cell surface;GO:0005737:cytoplasm;GO:0032127:dense core granule membra... <Preview truncated at 128 characters>	GO:0005509:calcium ion binding;GO:0050839:cell adhesion molecule binding;GO:0004222:metalloendopeptidase activity;GO:0008237:met... <Preview truncated at 128 characters>	K06540	-
ENSG00000151388	382.608	1.63686	0.710932	0.101813	6.98269	2.89577e-12	4.77828e-11	5	33523535	33892019	-	ADAMTS12	ADAM metallopeptidase with thrombospondin type 1 motif 12 [Source:HGNC Symbol%3BAcc:HGNC:14605]	GO:0016477:cell migration;GO:0007160:cell-matrix adhesion;GO:0071773:cellular response to BMP stimulus;GO:0071347:cellular respo... <Preview truncated at 128 characters>	GO:0031012:extracellular matrix;GO:0005576:extracellular region;	GO:0046872:metal ion binding;GO:0004222:metalloendopeptidase activity;	K08626	-
ENSG00000143382	378.847	0.544758	-0.876312	0.107822	-8.12737	4.38714e-16	1.05767e-14	1	150549369	150560937	+	ADAMTSL4	ADAMTS like 4 [Source:HGNC Symbol%3BAcc:HGNC:19706]	GO:0006915:apoptotic process;GO:0002064:epithelial cell development;GO:0030198:extracellular matrix organization;GO:0043065:posi... <Preview truncated at 128 characters>	GO:0005788:endoplasmic reticulum lumen;GO:0031012:extracellular matrix;GO:0005576:extracellular region;GO:0005614:interstitial m... <Preview truncated at 128 characters>	GO:0042802:identical protein binding;GO:0004222:metalloendopeptidase activity;GO:0002020:protease binding;	K15225	;ko04918 Thyroid hormone synthesis;
ENSG00000189007	344.833	1.4382	0.524262	0.103803	5.05056	4.40526e-07	3.67272e-06	6	143422832	143450695	-	ADAT2	adenosine deaminase tRNA specific 2 [Source:HGNC Symbol%3BAcc:HGNC:21172]	GO:0002100:tRNA wobble adenosine to inosine editing;	GO:0005654:nucleoplasm;	GO:0052717:tRNA-specific adenosine-34 deaminase activity;GO:0008270:zinc ion binding;	K15441	-
ENSG00000138031	691.209	1.64276	0.716119	0.0729148	9.82131	9.11483e-23	3.64793e-21	2	24819169	24920237	-	ADCY3	adenylate cyclase 3 [Source:HGNC Symbol%3BAcc:HGNC:234]	GO:0007340:acrosome reaction;GO:0007189:adenylate cyclase-activating G-protein coupled receptor signaling pathway;GO:0006171:cAM... <Preview truncated at 128 characters>	GO:0060170:ciliary membrane;GO:0005929:cilium;GO:0005737:cytoplasm;GO:0005794:Golgi apparatus;GO:0016021:integral component of m... <Preview truncated at 128 characters>	GO:0004016:adenylate cyclase activity;GO:0005524:ATP binding;GO:0005516:calmodulin binding;GO:0046872:metal ion binding;GO:00082... <Preview truncated at 128 characters>	K08043	;ko00230 Purine metabolism;ko01100 Metabolic pathways;ko01522 Endocrine resistance;ko04015 Rap1 signaling pathway;ko04020 Calciu... <Preview truncated at 128 characters>
ENSG00000174233	397.553	0.773264	-0.370966	0.0933999	-3.97181	7.13294e-05	0.000399559	12	48766194	48789089	-	ADCY6	adenylate cyclase 6 [Source:HGNC Symbol%3BAcc:HGNC:237]	GO:0007189:adenylate cyclase-activating G-protein coupled receptor signaling pathway;GO:0007193:adenylate cyclase-inhibiting G-p... <Preview truncated at 128 characters>	GO:0005929:cilium;GO:0005887:integral component of plasma membrane;GO:0031226:intrinsic component of plasma membrane;GO:0016020:... <Preview truncated at 128 characters>	GO:0004016:adenylate cyclase activity;GO:0005524:ATP binding;GO:0046872:metal ion binding;GO:0019901:protein kinase binding;GO:0... <Preview truncated at 128 characters>	K08046	;ko00230 Purine metabolism;ko01100 Metabolic pathways;ko01522 Endocrine resistance;ko04015 Rap1 signaling pathway;ko04022 cGMP-P... <Preview truncated at 128 characters>
ENSG00000087274	1765.28	0.826956	-0.274117	0.0498395	-5.49999	3.79813e-08	3.74478e-07	4	2843844	2930076	+	ADD1	adducin 1 [Source:HGNC Symbol%3BAcc:HGNC:243]	GO:0030036:actin cytoskeleton organization;GO:0051017:actin filament bundle assembly;GO:0051016:barbed-end actin filament cappin... <Preview truncated at 128 characters>	GO:0005912:adherens junction;GO:0005737:cytoplasm;GO:0005856:cytoskeleton;GO:0005829:cytosol;GO:0008290:F-actin capping protein ... <Preview truncated at 128 characters>	GO:0003779:actin binding;GO:0051015:actin filament binding;GO:0045296:cadherin binding;GO:0005516:calmodulin binding;GO:0046982:... <Preview truncated at 128 characters>	K18622;K11504	-
ENSG00000148700	1588.94	0.713127	-0.487768	0.0594641	-8.20273	2.3499e-16	5.77974e-15	10	109996368	110135565	+	ADD3	adducin 3 [Source:HGNC Symbol%3BAcc:HGNC:245]	GO:0051016:barbed-end actin filament capping;	GO:0005903:brush border;GO:0005938:cell cortex;GO:0005911:cell-cell junction;GO:0000794:condensed nuclear chromosome;GO:0005856:... <Preview truncated at 128 characters>	GO:0051015:actin filament binding;GO:0005516:calmodulin binding;GO:0005200:structural constituent of cytoskeleton;	K18622	-
ENSG00000123146	286.035	1.30304	0.38188	0.113789	3.35604	0.000790666	0.00350064	19	14380501	14408725	+	ADGRE5	adhesion G protein-coupled receptor E5 [Source:HGNC Symbol%3BAcc:HGNC:1711]	GO:0007189:adenylate cyclase-activating G-protein coupled receptor signaling pathway;GO:0007155:cell adhesion;GO:0007166:cell su... <Preview truncated at 128 characters>	GO:0070062:extracellular exosome;GO:0005925:focal adhesion;GO:0005887:integral component of plasma membrane;GO:0016020:membrane;... <Preview truncated at 128 characters>	GO:0005509:calcium ion binding;GO:0004930:G-protein coupled receptor activity;GO:0004888:transmembrane signaling receptor activi... <Preview truncated at 128 characters>	K08446;K08443	-
ENSG00000153292	1427.63	0.52078	-0.941255	0.0553396	-17.0087	7.08025e-65	2.15358e-62	6	46997708	47042350	-	ADGRF1	adhesion G protein-coupled receptor F1 [Source:HGNC Symbol%3BAcc:HGNC:18990]	GO:0007189:adenylate cyclase-activating G-protein coupled receptor signaling pathway;GO:0007166:cell surface receptor signaling ... <Preview truncated at 128 characters>	GO:0005576:extracellular region;GO:0016021:integral component of membrane;GO:0005886:plasma membrane;	GO:0004930:G-protein coupled receptor activity;	K08453	-
ENSG00000205336	1294.65	0.735112	-0.443963	0.0587283	-7.55961	4.04277e-14	8.15254e-13	16	57610652	57665580	+	ADGRG1	adhesion G protein-coupled receptor G1 [Source:HGNC Symbol%3BAcc:HGNC:4512]	GO:0007189:adenylate cyclase-activating G-protein coupled receptor signaling pathway;GO:0001525:angiogenesis;GO:0007420:brain de... <Preview truncated at 128 characters>	GO:0070062:extracellular exosome;GO:0097451:glial limiting end-foot;GO:0016021:integral component of membrane;GO:0005887:integra... <Preview truncated at 128 characters>	GO:0005518:collagen binding;GO:0050840:extracellular matrix binding;GO:0004930:G-protein coupled receptor activity;GO:0008201:he... <Preview truncated at 128 characters>	K08450;K09228;K08857	-
ENSG00000112414	1701.61	0.817524	-0.290667	0.0521644	-5.57214	2.51632e-08	2.55553e-07	6	142301854	142446266	+	ADGRG6	adhesion G protein-coupled receptor G6 [Source:HGNC Symbol%3BAcc:HGNC:13841]	GO:0007189:adenylate cyclase-activating G-protein coupled receptor signaling pathway;GO:0019933:cAMP-mediated signaling;GO:00071... <Preview truncated at 128 characters>	GO:0009986:cell surface;GO:0005737:cytoplasm;GO:0005789:endoplasmic reticulum membrane;GO:0016021:integral component of membrane... <Preview truncated at 128 characters>	GO:0005518:collagen binding;GO:0004175:endopeptidase activity;GO:0050840:extracellular matrix binding;GO:0004930:G-protein coupl... <Preview truncated at 128 characters>	K08463	-
ENSG00000148926	355.902	0.493339	-1.01935	0.114511	-8.90175	5.49713e-19	1.70038e-17	11	10305073	10307397	+	ADM	adrenomedullin [Source:HGNC Symbol%3BAcc:HGNC:259]	GO:0007189:adenylate cyclase-activating G-protein coupled receptor signaling pathway;GO:1990410:adrenomedullin receptor signalin... <Preview truncated at 128 characters>	GO:0005737:cytoplasm;GO:0005576:extracellular region;GO:0005615:extracellular space;	GO:0031700:adrenomedullin receptor binding;GO:0005179:hormone activity;GO:0005102:receptor binding;	K12333	;ko04080 Neuroactive ligand-receptor interaction;ko04270 Vascular smooth muscle contraction;
ENSG00000101544	1088.97	1.21256	0.278054	0.061016	4.55707	5.1872e-06	3.59948e-05	18	80109262	80147523	+	ADNP2	ADNP homeobox 2 [Source:HGNC Symbol%3BAcc:HGNC:23803]	GO:0034599:cellular response to oxidative stress;GO:0071300:cellular response to retinoic acid;GO:0060548:negative regulation of... <Preview truncated at 128 characters>	GO:0000785:chromatin;GO:0005634:nucleus;	GO:0003677:DNA binding;GO:0000981:sequence-specific DNA binding RNA polymerase II transcription factor activity;GO:0046872:metal... <Preview truncated at 128 characters>	-	-
ENSG00000181915	661.761	1.23247	0.301552	0.0712041	4.23504	2.28515e-05	0.000140465	10	62804720	62808479	+	ADO	2-aminoethanethiol dioxygenase [Source:HGNC Symbol%3BAcc:HGNC:23506]	-	GO:0005829:cytosol;	GO:0047800:cysteamine dioxygenase activity;GO:0046872:metal ion binding;	K10712	;ko00430 Taurine and hypotaurine metabolism;ko01100 Metabolic pathways;
ENSG00000170425	841.465	1.42509	0.511054	0.077423	6.6008	4.08942e-11	5.86269e-10	17	15945130	15975746	+	ADORA2B	adenosine A2b receptor [Source:HGNC Symbol%3BAcc:HGNC:264]	GO:0007190:activation of adenylate cyclase activity;GO:0000187:activation of MAPK activity;GO:0006968:cellular defense response;... <Preview truncated at 128 characters>	GO:0005887:integral component of plasma membrane;GO:0005886:plasma membrane;	GO:0001609:G-protein coupled adenosine receptor activity;	K04267	;ko04015 Rap1 signaling pathway;ko04020 Calcium signaling pathway;ko04080 Neuroactive ligand-receptor interaction;ko04270 Vascul... <Preview truncated at 128 characters>
ENSG00000130706	1203.03	1.26076	0.334296	0.072101	4.6365	3.54351e-06	2.52811e-05	20	62302093	62308862	+	ADRM1	ADRM1 26S proteasome ubiquitin receptor [Source:HGNC Symbol%3BAcc:HGNC:15759]	GO:0043248:proteasome assembly;GO:0006368:transcription elongation from RNA polymerase II promoter;GO:0006511:ubiquitin-dependen... <Preview truncated at 128 characters>	GO:0005829:cytosol;GO:0005654:nucleoplasm;GO:0005886:plasma membrane;GO:0000502:proteasome complex;GO:0008541:proteasome regulat... <Preview truncated at 128 characters>	GO:0061133:endopeptidase activator activity;GO:0002020:protease binding;GO:0070628:proteasome binding;GO:0043130:ubiquitin bindi... <Preview truncated at 128 characters>	-	-
ENSG00000239900	389.036	1.28928	0.366561	0.0931038	3.93712	8.24643e-05	0.000455638	22	40346461	40390463	+	ADSL	adenylosuccinate lyase [Source:HGNC Symbol%3BAcc:HGNC:291]	GO:0044208:de novo AMP biosynthetic process;GO:0006189:de novo IMP biosynthetic process;GO:0009060:aerobic respiration;GO:00... <Preview truncated at 128 characters>	GO:0005829:cytosol;GO:0032991:macromolecular complex;	GO:0070626:(S)-2-(5-amino-1-(5-phospho-D-ribosyl)imidazole-4-carboxamido)succinate AMP-lyase (fumarate-forming) activity;GO:0042... <Preview truncated at 128 characters>	K01756	;ko00230 Purine metabolism;ko00250 Alanine, aspartate and glutamate metabolism;ko01100 Metabolic pathways;ko01240 Biosynthesis o... <Preview truncated at 128 characters>
ENSG00000181026	432.584	2.08206	1.05801	0.0978272	10.8151	2.92046e-27	1.52717e-25	15	88621337	88632281	+	AEN	apoptosis enhancing nuclease [Source:HGNC Symbol%3BAcc:HGNC:25722]	GO:0042771:intrinsic apoptotic signaling pathway in response to DNA damage by p53 class mediator;GO:0010212:response to ionizing... <Preview truncated at 128 characters>	GO:0031965:nuclear membrane;GO:0005730:nucleolus;GO:0005654:nucleoplasm;GO:0005634:nucleus;	GO:0004527:exonuclease activity;GO:0003676:nucleic acid binding;	K18340	-
ENSG00000169129	2565.23	0.801414	-0.31938	0.0445047	-7.17633	7.1607e-13	1.26386e-11	10	114294824	114404756	-	AFAP1L2	actin filament associated protein 1 like 2 [Source:HGNC Symbol%3BAcc:HGNC:25901]	GO:0006954:inflammatory response;GO:0045742:positive regulation of epidermal growth factor receptor signaling pathway;GO:0032757... <Preview truncated at 128 characters>	GO:0005737:cytoplasm;GO:0005829:cytosol;GO:0005886:plasma membrane;	GO:0030296:protein tyrosine kinase activator activity;GO:0042169:SH2 domain binding;GO:0017124:SH3 domain binding;GO:0035591:sig... <Preview truncated at 128 characters>	-	-
ENSG00000038002	312.922	0.724547	-0.464848	0.107437	-4.32669	1.51369e-05	9.65901e-05	4	177430774	177442437	-	AGA	aspartylglucosaminidase [Source:HGNC Symbol%3BAcc:HGNC:318]	GO:0006517:protein deglycosylation;	GO:0035578:azurophil granule lumen;GO:0005737:cytoplasm;GO:0005783:endoplasmic reticulum;GO:0005576:extracellular region;GO:0005... <Preview truncated at 128 characters>	GO:0003948:N4-(beta-N-acetylglucosaminyl)-L-asparaginase activity;GO:0008233:peptidase activity;GO:0043621:protein self-associat... <Preview truncated at 128 characters>	K01444	;ko00511 Other glycan degradation;ko04142 Lysosome;
ENSG00000106351	290.352	0.739015	-0.436324	0.107723	-4.05042	5.11249e-05	0.000294982	7	100539203	100568220	+	AGFG2	ArfGAP with FG repeats 2 [Source:HGNC Symbol%3BAcc:HGNC:5177]	-	GO:0016020:membrane;	GO:0005096:GTPase activator activity;GO:0046872:metal ion binding;	K11341	-
ENSG00000123908	1826.21	1.28107	0.357349	0.0553161	6.46013	1.04615e-10	1.4355e-09	8	140520156	140635633	-	AGO2	argonaute RISC catalytic component 2 [Source:HGNC Symbol%3BAcc:HGNC:3263]	GO:0035280:miRNA loading onto RISC involved in gene silencing by miRNA;GO:0035278:negative regulation of translation involved in... <Preview truncated at 128 characters>	GO:0005737:cytoplasm;GO:0036464:cytoplasmic ribonucleoprotein granule;GO:0005829:cytosol;GO:0005634:nucleus;GO:0000932:cytoplasm... <Preview truncated at 128 characters>	GO:0001046:core promoter sequence-specific DNA binding;GO:0003725:double-stranded RNA binding;GO:0035198:miRNA binding;GO:000372... <Preview truncated at 128 characters>	K11593	;ko04361 Axon regeneration;
ENSG00000134698	463.574	0.710329	-0.493442	0.0930709	-5.30178	1.14676e-07	1.04799e-06	1	35808016	35857890	+	AGO4	argonaute RISC component 4 [Source:HGNC Symbol%3BAcc:HGNC:18424]	GO:0008584:male gonad development;GO:0007140:male meiosis;GO:0035280:miRNA loading onto RISC involved in gene silencing by miRNA... <Preview truncated at 128 characters>	GO:0005737:cytoplasm;GO:0036464:cytoplasmic ribonucleoprotein granule;GO:0005829:cytosol;GO:0016020:membrane;GO:0005634:nucleus;... <Preview truncated at 128 characters>	GO:0003725:double-stranded RNA binding;GO:0035198:miRNA binding;GO:0003727:single-stranded RNA binding;	K11593	;ko04361 Axon regeneration;
ENSG00000155189	1220.79	1.61047	0.687484	0.0618485	11.1156	1.05327e-28	6.00691e-27	8	6708642	6761503	+	AGPAT5	1-acylglycerol-3-phosphate O-acyltransferase 5 [Source:HGNC Symbol%3BAcc:HGNC:20886]	GO:0006639:acylglycerol metabolic process;GO:0016024:CDP-diacylglycerol biosynthetic process;GO:0002244:hematopoietic progenitor... <Preview truncated at 128 characters>	GO:0012505:endomembrane system;GO:0005789:endoplasmic reticulum membrane;GO:0016021:integral component of membrane;GO:0005741:mi... <Preview truncated at 128 characters>	GO:0003841:1-acylglycerol-3-phosphate O-acyltransferase activity;GO:0016746:transferase activity, transferring acyl groups;	K19007	;ko00561 Glycerolipid metabolism;ko00564 Glycerophospholipid metabolism;ko01100 Metabolic pathways;ko04072 Phospholipase D signa... <Preview truncated at 128 characters>
ENSG00000106541	430.865	0.221371	-2.17546	0.109314	-19.9011	3.97818e-88	3.02507e-85	7	16791811	16833433	-	AGR2	anterior gradient 2%2C protein disulphide isomerase family member [Source:HGNC Symbol%3BAcc:HGNC:328]	GO:0048546:digestive tract morphogenesis;GO:0060480:lung goblet cell differentiation;GO:0070254:mucus secretion;GO:0060548:negat... <Preview truncated at 128 characters>	GO:0005783:endoplasmic reticulum;GO:0005615:extracellular space;	GO:0002162:dystroglycan binding;GO:0005154:epidermal growth factor receptor binding;GO:0042802:identical protein binding;	-	-
ENSG00000188157	4581.4	0.808769	-0.306201	0.0977022	-3.13403	0.00172425	0.00700836	1	1020120	1056118	+	AGRN	agrin [Source:HGNC Symbol%3BAcc:HGNC:329]	GO:0009887:organ morphogenesis;GO:0045162:clustering of voltage-gated sodium channels;GO:0007213:G-protein coupled acetylcholine... <Preview truncated at 128 characters>	GO:0005604:basement membrane;GO:0070062:extracellular exosome;GO:0005576:extracellular region;GO:0005796:Golgi lumen;GO:0016021:... <Preview truncated at 128 characters>	GO:0005509:calcium ion binding;GO:0035374:chondroitin sulfate binding;GO:0002162:dystroglycan binding;GO:0043395:heparan sulfate... <Preview truncated at 128 characters>	K06254	;ko04512 ECM-receptor interaction;
ENSG00000153207	3669.42	1.43095	0.516977	0.0443986	11.644	2.46218e-31	1.62807e-29	1	246839098	246931948	-	AHCTF1	AT-hook containing transcription factor 1 [Source:HGNC Symbol%3BAcc:HGNC:24618]	GO:0007049:cell cycle;GO:0051301:cell division;GO:0051028:mRNA transport;GO:0051292:nuclear pore complex assembly;GO:0015031:pro... <Preview truncated at 128 characters>	GO:0005829:cytosol;GO:0070062:extracellular exosome;GO:0000776:kinetochore;GO:0016363:nuclear matrix;GO:0031965:nuclear membrane... <Preview truncated at 128 characters>	GO:0003677:DNA binding;	-	-
ENSG00000226121	235.123	1.31352	0.393443	0.120058	3.2771	0.00104878	0.00450465	2	161500885	161507705	-	AHCTF1P1	AT-hook containing transcription factor 1 pseudogene 1 [Source:HGNC Symbol%3BAcc:HGNC:24620]	GO:0007049:cell cycle;GO:0051301:cell division;GO:0051028:mRNA transport;GO:0051292:nuclear pore complex assembly;GO:0015031:pro... <Preview truncated at 128 characters>	GO:0005829:cytosol;GO:0070062:extracellular exosome;GO:0000776:kinetochore;GO:0016363:nuclear matrix;GO:0031965:nuclear membrane... <Preview truncated at 128 characters>	GO:0003677:DNA binding;	-	-
ENSG00000101444	5057.06	1.37085	0.455072	0.0384912	11.8228	2.97732e-32	2.08184e-30	20	34280268	34311802	-	AHCY	adenosylhomocysteinase [Source:HGNC Symbol%3BAcc:HGNC:343]	GO:0002439:chronic inflammatory response to antigenic stimulus;GO:0042745:circadian sleep/wake cycle;GO:0006730:one-carbon metab... <Preview truncated at 128 characters>	GO:0005829:cytosol;GO:0070062:extracellular exosome;GO:0042470:melanosome;GO:0043005:neuron projection;GO:0005634:nucleus;	GO:0004013:adenosylhomocysteinase activity;GO:0030554:adenyl nucleotide binding;GO:0042802:identical protein binding;GO:0051287:... <Preview truncated at 128 characters>	K01251	;ko00270 Cysteine and methionine metabolism;ko01100 Metabolic pathways;
ENSG00000124942	69051.4	0.638887	-0.646368	0.036998	-17.4703	2.41049e-68	8.30026e-66	11	62433542	62556235	-	AHNAK	AHNAK nucleoprotein [Source:HGNC Symbol%3BAcc:HGNC:347]	GO:0043484:regulation of RNA splicing;GO:1901385:regulation of voltage-gated calcium channel activity;	GO:0015629:actin cytoskeleton;GO:0044291:cell-cell contact zone;GO:0043034:costamere;GO:0005737:cytoplasm;GO:0005829:cytosol;GO:... <Preview truncated at 128 characters>	GO:0045296:cadherin binding;GO:0042802:identical protein binding;GO:0003723:RNA binding;GO:0044548:S100 protein binding;GO:00974... <Preview truncated at 128 characters>	-	-
ENSG00000185567	6020.96	0.585318	-0.772707	0.0454012	-17.0195	5.88237e-65	1.81955e-62	14	104937244	104978374	-	AHNAK2	AHNAK nucleoprotein 2 [Source:HGNC Symbol%3BAcc:HGNC:20125]	GO:0043484:regulation of RNA splicing;	GO:0005737:cytoplasm;GO:0005829:cytosol;GO:0005634:nucleus;GO:0005886:plasma membrane;GO:0042383:sarcolemma;GO:0030315:T-tubule;	-	-	-
ENSG00000100591	2639.22	1.58196	0.661718	0.0473653	13.9705	2.35917e-44	3.09748e-42	14	77457870	77469472	+	AHSA1	activator of HSP90 ATPase activity 1 [Source:HGNC Symbol%3BAcc:HGNC:1189]	GO:0032781:positive regulation of ATPase activity;GO:0006457:protein folding;	GO:0005829:cytosol;GO:0005783:endoplasmic reticulum;GO:0070062:extracellular exosome;	GO:0001671:ATPase activator activity;GO:0045296:cadherin binding;GO:0051087:chaperone binding;GO:0051879:Hsp90 protein binding;	K17985	;ko04137 Mitophagy - animal;ko04140 Autophagy - animal;ko05010 Alzheimer disease;ko05014 Amyotrophic lateral sclerosis;ko05016 H... <Preview truncated at 128 characters>
ENSG00000106305	788.321	1.49561	0.580738	0.0690345	8.41229	4.02093e-17	1.05132e-15	7	6009255	6023834	+	AIMP2	aminoacyl tRNA synthetase complex interacting multifunctional protein 2 [Source:HGNC Symbol%3BAcc:HGNC:20609]	GO:0006915:apoptotic process;GO:0008285:negative regulation of cell proliferation;GO:1903632:positive regulation of aminoacyl-tR... <Preview truncated at 128 characters>	GO:0017101:aminoacyl-tRNA synthetase multienzyme complex;GO:0005829:cytosol;GO:0016020:membrane;GO:0005634:nucleus;	GO:0060090:binding, bridging;	K15438	-
ENSG00000129474	2830.87	0.825235	-0.277123	0.0458039	-6.05019	1.44673e-09	1.72794e-08	14	22971177	22982551	-	AJUBA	ajuba LIM protein [Source:HGNC Symbol%3BAcc:HGNC:20250]	GO:0016339:calcium-dependent cell-cell adhesion via plasma membrane cell adhesion molecules;GO:0007049:cell cycle;GO:0034613:cel... <Preview truncated at 128 characters>	GO:0005912:adherens junction;GO:0005911:cell-cell junction;GO:0005829:cytosol;GO:0005925:focal adhesion;GO:0005794:Golgi apparat... <Preview truncated at 128 characters>	GO:0051015:actin filament binding;GO:0045294:alpha-catenin binding;GO:0003682:chromatin binding;GO:0046872:metal ion binding;GO:... <Preview truncated at 128 characters>	K16682	;ko04390 Hippo signaling pathway;ko04391 Hippo signaling pathway - fly;ko04392 Hippo signaling pathway - multiple species;
ENSG00000004455	4075.33	1.49582	0.580934	0.0461144	12.5977	2.17492e-36	1.9175e-34	1	33007986	33080996	-	AK2	adenylate kinase 2 [Source:HGNC Symbol%3BAcc:HGNC:362]	GO:0006172:ADP biosynthetic process;GO:0046033:AMP metabolic process;GO:0046034:ATP metabolic process;GO:0015949:nucleobase-cont... <Preview truncated at 128 characters>	GO:0005737:cytoplasm;GO:0070062:extracellular exosome;GO:0005758:mitochondrial intermembrane space;GO:0005739:mitochondrion;GO:0... <Preview truncated at 128 characters>	GO:0004017:adenylate kinase activity;GO:0005524:ATP binding;	K00939	;ko00230 Purine metabolism;ko00730 Thiamine metabolism;ko01100 Metabolic pathways;ko01240 Biosynthesis of cofactors;
ENSG00000263535	274.601	1.21249	0.277968	0.109185	2.54584	0.0109017	0.0348006	17	31345519	31346190	+	AK4P1	adenylate kinase 4 pseudogene 1 [Source:HGNC Symbol%3BAcc:HGNC:364]	GO:0006172:ADP biosynthetic process;GO:0046033:AMP metabolic process;GO:0046034:ATP metabolic process;GO:0007420:brain developme... <Preview truncated at 128 characters>	GO:0005737:cytoplasm;GO:0005759:mitochondrial matrix;GO:0005739:mitochondrion;	GO:0004017:adenylate kinase activity;GO:0005524:ATP binding;GO:0005525:GTP binding;GO:0004550:nucleoside diphosphate kinase acti... <Preview truncated at 128 characters>	K00939	;ko00230 Purine metabolism;ko00730 Thiamine metabolism;ko01100 Metabolic pathways;ko01240 Biosynthesis of cofactors;
ENSG00000155085	156.315	0.550284	-0.861752	0.150646	-5.72037	1.06295e-08	1.13643e-07	6	109492855	109691217	-	AK9	adenylate kinase 9 [Source:HGNC Symbol%3BAcc:HGNC:33814]	GO:0006756:AMP phosphorylation;GO:0006757:ADP phosphorylation;GO:0061508:CDP phosphorylation;GO:0061566:CMP phosphorylation;GO:0... <Preview truncated at 128 characters>	GO:0005737:cytoplasm;GO:0005829:cytosol;GO:0005739:mitochondrion;GO:0031965:nuclear membrane;GO:0005654:nucleoplasm;GO:0005634:n... <Preview truncated at 128 characters>	GO:0004017:adenylate kinase activity;GO:0005524:ATP binding;GO:0004550:nucleoside diphosphate kinase activity;GO:0050145:nucleos... <Preview truncated at 128 characters>	K18533	;ko00230 Purine metabolism;ko00240 Pyrimidine metabolism;ko01100 Metabolic pathways;ko01240 Biosynthesis of cofactors;
ENSG00000170776	4708.28	0.735744	-0.442724	0.0417086	-10.6147	2.5461e-26	1.26957e-24	15	85380571	85749358	+	AKAP13	A-kinase anchoring protein 13 [Source:HGNC Symbol%3BAcc:HGNC:371]	GO:0086023:adrenergic receptor signaling pathway involved in heart process;GO:0071875:adrenergic receptor signaling pathway;GO:0... <Preview truncated at 128 characters>	GO:0005938:cell cortex;GO:0005829:cytosol;GO:0016020:membrane;GO:0005634:nucleus;GO:0048471:perinuclear region of cytoplasm;GO:0... <Preview truncated at 128 characters>	GO:0004691:cAMP-dependent protein kinase activity;GO:0005085:guanyl-nucleotide exchange factor activity;GO:0005078:MAP-kinase sc... <Preview truncated at 128 characters>	K16529	;ko04928 Parathyroid hormone synthesis, secretion and action;ko05163 Human cytomegalovirus infection;
ENSG00000174574	1106.25	1.34199	0.42437	0.0593811	7.14656	8.89788e-13	1.54949e-11	1	38991276	39006059	+	AKIRIN1	akirin 1 [Source:HGNC Symbol%3BAcc:HGNC:25744]	GO:0014839:myoblast migration involved in skeletal muscle regeneration;GO:1902725:negative regulation of satellite cell differen... <Preview truncated at 128 characters>	GO:0000785:chromatin;GO:0031965:nuclear membrane;GO:0005654:nucleoplasm;GO:0005634:nucleus;	GO:0003712:transcription cofactor activity;	K17985	;ko04137 Mitophagy - animal;ko04140 Autophagy - animal;ko05010 Alzheimer disease;ko05014 Amyotrophic lateral sclerosis;ko05016 H... <Preview truncated at 128 characters>
ENSG00000117448	1213.79	0.816489	-0.292495	0.0622771	-4.69667	2.64439e-06	1.92501e-05	1	45550543	45570049	+	AKR1A1	aldo-keto reductase family 1 member A1 [Source:HGNC Symbol%3BAcc:HGNC:380]	GO:0046185:aldehyde catabolic process;GO:0006081:cellular aldehyde metabolic process;GO:0042840:D-glucuronate catabolic process;... <Preview truncated at 128 characters>	GO:0016324:apical plasma membrane;GO:0005829:cytosol;GO:0070062:extracellular exosome;GO:0005615:extracellular space;GO:0045202:... <Preview truncated at 128 characters>	GO:0004032:alditol:NADP+ 1-oxidoreductase activity;GO:0004033:aldo-keto reductase (NADP) activity;GO:0047655:allyl-alcohol dehyd... <Preview truncated at 128 characters>	K00002	;ko00010 Glycolysis / Gluconeogenesis;ko00040 Pentose and glucuronate interconversions;ko00053 Ascorbate and aldarate metabolism... <Preview truncated at 128 characters>
ENSG00000187134	462.555	1.39869	0.484079	0.165754	2.92046	0.00349511	0.012954	10	4963253	4983283	+	AKR1C1	aldo-keto reductase family 1 member C1 [Source:HGNC Symbol%3BAcc:HGNC:384]	GO:0015721:bile acid and bile salt transport;GO:0008206:bile acid metabolic process;GO:0071395:cellular response to jasmonic aci... <Preview truncated at 128 characters>	GO:0005829:cytosol;GO:0070062:extracellular exosome;	GO:0047006:17-alpha,20-alpha-dihydroxypregn-4-en-3-one dehydrogenase activity;GO:0044594:17-beta-hydroxysteroid dehydrogenase (N... <Preview truncated at 128 characters>	K00089	;ko00140 Steroid hormone biosynthesis;ko05204 Chemical carcinogenesis;
ENSG00000196139	281.516	1.28342	0.359993	0.108101	3.33017	0.000867936	0.00381407	10	5035354	5107686	+	AKR1C3	aldo-keto reductase family 1 member C3 [Source:HGNC Symbol%3BAcc:HGNC:386]	GO:0008206:bile acid metabolic process;GO:0007586:digestion;GO:0071276:cellular response to cadmium ion;GO:0071277:cellular resp... <Preview truncated at 128 characters>	GO:0005829:cytosol;GO:0005737:cytoplasm;GO:0070062:extracellular exosome;GO:0005634:nucleus;	GO:0047006:17-alpha,20-alpha-dihydroxypregn-4-en-3-one dehydrogenase activity;GO:0044594:17-beta-hydroxysteroid dehydrogenase (N... <Preview truncated at 128 characters>	K04119	;ko00140 Steroid hormone biosynthesis;ko00590 Arachidonic acid metabolism;ko00790 Folate biosynthesis;ko01100 Metabolic pathways... <Preview truncated at 128 characters>
ENSG00000142208	1587.3	1.22324	0.29071	0.0530559	5.47932	4.26973e-08	4.19163e-07	14	104769349	104795751	-	AKT1	AKT serine/threonine kinase 1 [Source:HGNC Symbol%3BAcc:HGNC:391]	GO:0006924:activation-induced cell death of T cells;GO:0007568:aging;GO:0043276:anoikis;GO:0008637:apoptotic mitochondrial chang... <Preview truncated at 128 characters>	GO:0005911:cell-cell junction;GO:0036064:ciliary basal body;GO:0005737:cytoplasm;GO:0005829:cytosol;GO:0005634:nucleus;	GO:0071889:14-3-3 protein binding;GO:0005524:ATP binding;GO:0005516:calmodulin binding;GO:0019899:enzyme binding;GO:0004674:prot... <Preview truncated at 128 characters>	K04456	;ko01521 EGFR tyrosine kinase inhibitor resistance;ko01522 Endocrine resistance;ko01524 Platinum drug resistance;ko04010 MAPK si... <Preview truncated at 128 characters>
ENSG00000023330	633.881	1.31548	0.395585	0.0827289	4.7817	1.73816e-06	1.31135e-05	3	52198086	52214327	+	ALAS1	5-aminolevulinate synthase 1 [Source:HGNC Symbol%3BAcc:HGNC:396]	GO:0048821:erythrocyte development;GO:0006783:heme biosynthetic process;GO:0042541:hemoglobin biosynthetic process;GO:0006782:pr... <Preview truncated at 128 characters>	GO:0005829:cytosol;GO:0005759:mitochondrial matrix;GO:0005739:mitochondrion;GO:0005654:nucleoplasm;	GO:0003870:5-aminolevulinate synthase activity;GO:0042802:identical protein binding;GO:0030170:pyridoxal phosphate binding;	K00643	;ko00260 Glycine, serine and threonine metabolism;ko00860 Porphyrin and chlorophyll metabolism;ko01100 Metabolic pathways;ko0124... <Preview truncated at 128 characters>
ENSG00000165092	131.067	0.130509	-2.93778	0.205243	-14.3137	1.79759e-46	2.56297e-44	9	72900671	73080442	-	ALDH1A1	aldehyde dehydrogenase 1 family member A1 [Source:HGNC Symbol%3BAcc:HGNC:402]	GO:0030392:fructosamine catabolic process;GO:0009449:gamma-aminobutyric acid biosynthetic process;GO:0036438:maintenance of lens... <Preview truncated at 128 characters>	GO:0030424:axon;GO:0005829:cytosol;GO:0045202:synapse;GO:0005737:cytoplasm;GO:0070062:extracellular exosome;	GO:0004029:aldehyde dehydrogenase (NAD) activity;GO:0019145:aminobutyraldehyde dehydrogenase activity;GO:0018479:benzaldehyde de... <Preview truncated at 128 characters>	K07249	;ko00830 Retinol metabolism;ko01100 Metabolic pathways;
ENSG00000184254	8772.53	1.38148	0.46622	0.0405928	11.4853	1.56413e-30	9.98088e-29	15	100877714	100916626	+	ALDH1A3	aldehyde dehydrogenase 1 family member A3 [Source:HGNC Symbol%3BAcc:HGNC:409]	GO:0042904:9-cis-retinoic acid biosynthetic process;GO:0009952:anterior/posterior pattern specification;GO:0001568:blood vessel ... <Preview truncated at 128 characters>	GO:0005737:cytoplasm;GO:0005829:cytosol;GO:0048471:perinuclear region of cytoplasm;GO:0070062:extracellular exosome;	GO:0004028:3-chloroallyl aldehyde dehydrogenase activity;GO:0004029:aldehyde dehydrogenase (NAD) activity;GO:0016918:retinal bin... <Preview truncated at 128 characters>	K00129	;ko00010 Glycolysis / Gluconeogenesis;ko00340 Histidine metabolism;ko00350 Tyrosine metabolism;ko00360 Phenylalanine metabolism;... <Preview truncated at 128 characters>
ENSG00000137124	205.646	1.74772	0.805477	0.14425	5.58391	2.35169e-08	2.39634e-07	9	38392702	38398661	+	ALDH1B1	aldehyde dehydrogenase 1 family member B1 [Source:HGNC Symbol%3BAcc:HGNC:407]	GO:0006068:ethanol catabolic process;GO:0005975:carbohydrate metabolic process;	GO:0005759:mitochondrial matrix;GO:0005829:cytosol;GO:0043231:intracellular membrane-bounded organelle;GO:0005739:mitochondrion;... <Preview truncated at 128 characters>	GO:0004029:aldehyde dehydrogenase (NAD) activity;GO:0043878:glyceraldehyde-3-phosphate dehydrogenase (NAD+) (non-phosphorylating... <Preview truncated at 128 characters>	K00128	;ko00010 Glycolysis / Gluconeogenesis;ko00053 Ascorbate and aldarate metabolism;ko00071 Fatty acid degradation;ko00280 Valine, l... <Preview truncated at 128 characters>
ENSG00000111275	491.777	0.800761	-0.320556	0.0862209	-3.71784	0.00020093	0.00102059	12	111766887	111817532	+	ALDH2	aldehyde dehydrogenase 2 family member [Source:HGNC Symbol%3BAcc:HGNC:404]	GO:0006068:ethanol catabolic process;GO:0006066:alcohol metabolic process;GO:0005975:carbohydrate metabolic process;	GO:0005759:mitochondrial matrix;GO:0070062:extracellular exosome;	GO:0004029:aldehyde dehydrogenase (NAD) activity;GO:0043878:glyceraldehyde-3-phosphate dehydrogenase (NAD+) (non-phosphorylating... <Preview truncated at 128 characters>	K00128	;ko00010 Glycolysis / Gluconeogenesis;ko00053 Ascorbate and aldarate metabolism;ko00071 Fatty acid degradation;ko00280 Valine, l... <Preview truncated at 128 characters>
ENSG00000108602	984.609	0.382826	-1.38524	0.0742751	-18.6501	1.25984e-77	7.18504e-75	17	19737984	19748943	-	ALDH3A1	aldehyde dehydrogenase 3 family member A1 [Source:HGNC Symbol%3BAcc:HGNC:405]	GO:0007568:aging;GO:0006081:cellular aldehyde metabolic process;GO:0008284:positive regulation of cell proliferation;GO:0051591:... <Preview truncated at 128 characters>	GO:0005829:cytosol;GO:0005783:endoplasmic reticulum;GO:0005615:extracellular space;GO:0016021:integral component of membrane;GO:... <Preview truncated at 128 characters>	GO:0004028:3-chloroallyl aldehyde dehydrogenase activity;GO:0008106:alcohol dehydrogenase (NADP+) activity;GO:0004029:aldehyde d... <Preview truncated at 128 characters>	K00129	;ko00010 Glycolysis / Gluconeogenesis;ko00340 Histidine metabolism;ko00350 Tyrosine metabolism;ko00360 Phenylalanine metabolism;... <Preview truncated at 128 characters>
ENSG00000006534	357.119	0.44678	-1.16236	0.10298	-11.2873	1.51696e-29	9.22818e-28	11	68008578	68029282	+	ALDH3B1	aldehyde dehydrogenase 3 family member B1 [Source:HGNC Symbol%3BAcc:HGNC:410]	GO:0006066:alcohol metabolic process;GO:0046185:aldehyde catabolic process;GO:0034599:cellular response to oxidative stress;GO:0... <Preview truncated at 128 characters>	GO:0005737:cytoplasm;GO:0005829:cytosol;GO:0070062:extracellular exosome;GO:0005886:plasma membrane;GO:0030667:secretory granule... <Preview truncated at 128 characters>	GO:0004028:3-chloroallyl aldehyde dehydrogenase activity;GO:0004030:aldehyde dehydrogenase [NAD(P)+] activity;GO:0018479:benzald... <Preview truncated at 128 characters>	K00129	;ko00010 Glycolysis / Gluconeogenesis;ko00340 Histidine metabolism;ko00350 Tyrosine metabolism;ko00360 Phenylalanine metabolism;... <Preview truncated at 128 characters>
ENSG00000159423	259.206	0.723667	-0.466602	0.112107	-4.16211	3.15325e-05	0.000189502	1	18871430	18902724	-	ALDH4A1	aldehyde dehydrogenase 4 family member A1 [Source:HGNC Symbol%3BAcc:HGNC:406]	GO:0019470:4-hydroxyproline catabolic process;GO:0006562:proline catabolic process;GO:0010133:proline catabolic process to gluta... <Preview truncated at 128 characters>	GO:0005829:cytosol;GO:0005759:mitochondrial matrix;GO:0005739:mitochondrion;	GO:0003842:1-pyrroline-5-carboxylate dehydrogenase activity;GO:0004029:aldehyde dehydrogenase (NAD) activity;GO:0009055:electron... <Preview truncated at 128 characters>	K00294	;ko00250 Alanine, aspartate and glutamate metabolism;ko00330 Arginine and proline metabolism;ko01100 Metabolic pathways;
ENSG00000119711	298.758	0.563634	-0.827171	0.107086	-7.72435	1.12429e-14	2.36385e-13	14	74056847	74084492	-	ALDH6A1	aldehyde dehydrogenase 6 family member A1 [Source:HGNC Symbol%3BAcc:HGNC:7179]	GO:0006210:thymine catabolic process;GO:0019859:thymine metabolic process;GO:0006574:valine catabolic process;GO:0006573:valine ... <Preview truncated at 128 characters>	GO:0005739:mitochondrion;GO:0005759:mitochondrial matrix;GO:0005654:nucleoplasm;	GO:0000062:fatty-acyl-CoA binding;GO:0018478:malonate-semialdehyde dehydrogenase (acetylating) activity;GO:0004491:methylmalonat... <Preview truncated at 128 characters>	K00140	;ko00280 Valine, leucine and isoleucine degradation;ko00410 beta-Alanine metabolism;ko00562 Inositol phosphate metabolism;ko0064... <Preview truncated at 128 characters>
ENSG00000164904	2512.39	0.735932	-0.442355	0.051042	-8.6665	4.45626e-18	1.27671e-16	5	126531200	126595362	-	ALDH7A1	aldehyde dehydrogenase 7 family member A1 [Source:HGNC Symbol%3BAcc:HGNC:877]	GO:0006081:cellular aldehyde metabolic process;GO:0042426:choline catabolic process;GO:0019285:glycine betaine biosynthetic proc... <Preview truncated at 128 characters>	GO:0005829:cytosol;GO:0070062:extracellular exosome;GO:0005759:mitochondrial matrix;GO:0005739:mitochondrion;GO:0005634:nucleus;	GO:0004029:aldehyde dehydrogenase (NAD) activity;GO:0008802:betaine-aldehyde dehydrogenase activity;GO:0043878:glyceraldehyde-3-... <Preview truncated at 128 characters>	K14085;K04613	-
ENSG00000119523	692.44	1.19666	0.259009	0.0727581	3.55986	0.00037105	0.00178236	9	99216425	99221942	-	ALG2	ALG2 alpha-1%2C3/1%2C6-mannosyltransferase [Source:HGNC Symbol%3BAcc:HGNC:23159]	GO:0006488:dolichol-linked oligosaccharide biosynthetic process;GO:0006490:oligosaccharide-lipid intermediate biosynthetic proce... <Preview truncated at 128 characters>	GO:0015629:actin cytoskeleton;GO:0005737:cytoplasm;GO:0005829:cytosol;GO:0005789:endoplasmic reticulum membrane;GO:0016021:integ... <Preview truncated at 128 characters>	GO:0000033:alpha-1,3-mannosyltransferase activity;GO:0048306:calcium-dependent protein binding;GO:0004378:GDP-Man:Man1GlcNAc2-PP... <Preview truncated at 128 characters>	K03843	;ko00510 N-Glycan biosynthesis;ko00513 Various types of N-glycan biosynthesis;ko01100 Metabolic pathways;
ENSG00000214160	392.072	1.35013	0.433102	0.0920213	4.70654	2.51954e-06	1.83927e-05	3	184242301	184249548	-	ALG3	ALG3 alpha-1%2C3- mannosyltransferase [Source:HGNC Symbol%3BAcc:HGNC:23056]	GO:0006488:dolichol-linked oligosaccharide biosynthetic process;GO:0006486:protein glycosylation;	GO:0005783:endoplasmic reticulum;GO:0005789:endoplasmic reticulum membrane;GO:0016021:integral component of membrane;	GO:0000033:alpha-1,3-mannosyltransferase activity;GO:0052925:dol-P-Man:Man(5)GlcNAc(2)-PP-Dol alpha-1,3-mannosyltransferase acti... <Preview truncated at 128 characters>	K03845	;ko00510 N-Glycan biosynthesis;ko00513 Various types of N-glycan biosynthesis;ko01100 Metabolic pathways;
ENSG00000159063	1036.23	1.28393	0.360568	0.0666385	5.41081	6.27397e-08	5.97599e-07	11	78095244	78139660	-	ALG8	ALG8 alpha-1%2C3-glucosyltransferase [Source:HGNC Symbol%3BAcc:HGNC:23161]	GO:0006488:dolichol-linked oligosaccharide biosynthetic process;GO:0006490:oligosaccharide-lipid intermediate biosynthetic proce... <Preview truncated at 128 characters>	GO:0005789:endoplasmic reticulum membrane;GO:0016021:integral component of membrane;GO:0005634:nucleus;	GO:0000033:alpha-1,3-mannosyltransferase activity;GO:0042283:dolichyl pyrophosphate Glc1Man9GlcNAc2 alpha-1,3-glucosyltransferas... <Preview truncated at 128 characters>	K03849	;ko00510 N-Glycan biosynthesis;ko01100 Metabolic pathways;
ENSG00000189046	242.991	1.58541	0.664859	0.118383	5.61616	1.95251e-08	2.00638e-07	12	109088188	109093631	-	ALKBH2	alkB homolog 2%2C alpha-ketoglutarate dependent dioxygenase [Source:HGNC Symbol%3BAcc:HGNC:32487]	GO:0006307:DNA dealkylation involved in DNA repair;GO:0080111:DNA demethylation;GO:0070989:oxidative demethylation;GO:0035511:ox... <Preview truncated at 128 characters>	GO:0005654:nucleoplasm;	GO:0051747:cytosine C-5 DNA demethylase activity;GO:0043734:DNA-N1-methyladenine dioxygenase activity;GO:0008198:ferrous iron bi... <Preview truncated at 128 characters>	K10859	-
ENSG00000137760	580.137	1.22249	0.289822	0.0781398	3.70902	0.000208059	0.00105211	11	107502727	107565742	-	ALKBH8	alkB homolog 8%2C tRNA methyltransferase [Source:HGNC Symbol%3BAcc:HGNC:25189]	GO:0006974:cellular response to DNA damage stimulus;GO:0030488:tRNA methylation;GO:0002098:tRNA wobble uridine modification;	GO:0005737:cytoplasm;GO:0005829:cytosol;GO:0016604:nuclear body;GO:0005654:nucleoplasm;GO:0005634:nucleus;	GO:0016706:oxidoreductase activity, acting on paired donors, with incorporation or reduction of molecular oxygen, 2-oxoglutarate... <Preview truncated at 128 characters>	K10770	-
ENSG00000215067	147.154	0.701884	-0.510696	0.149702	-3.41142	0.000646266	0.00291795	17	6875232	7012530	-	ALOX12-AS1	ALOX12 antisense RNA 1 [Source:HGNC Symbol%3BAcc:HGNC:51342]	-	-	-	-	-
ENSG00000163286	145.03	0.109023	-3.1973	0.206998	-15.4461	8.01885e-54	1.55685e-51	2	232406844	232410714	+	ALPG	alkaline phosphatase%2C germ cell [Source:HGNC Symbol%3BAcc:HGNC:441]	GO:0016311:dephosphorylation;	GO:0031225:anchored component of membrane;GO:0005576:extracellular region;GO:0005886:plasma membrane;	GO:0004035:alkaline phosphatase activity;GO:0046872:metal ion binding;	K01077	;ko00730 Thiamine metabolism;ko00790 Folate biosynthesis;ko01100 Metabolic pathways;ko01240 Biosynthesis of cofactors;
ENSG00000073331	146.453	0.586714	-0.769271	0.156258	-4.92307	8.51962e-07	6.74255e-06	4	112285509	112442621	+	ALPK1	alpha kinase 1 [Source:HGNC Symbol%3BAcc:HGNC:20917]	GO:0060271:cilium morphogenesis;GO:0002753:cytoplasmic pattern recognition receptor signaling pathway;GO:0045087:innate immune r... <Preview truncated at 128 characters>	GO:0005813:centrosome;GO:0005929:cilium;GO:0005829:cytosol;GO:0000922:spindle pole;GO:0032391:photoreceptor connecting cilium;	GO:0005524:ATP binding;GO:0048029:monosaccharide binding;GO:0004674:protein serine/threonine kinase activity;	K08868	-
ENSG00000163283	2773.77	0.277613	-1.84885	0.122455	-15.0982	1.66464e-51	2.8933e-49	2	232378724	232382889	+	ALPP	alkaline phosphatase%2C placental [Source:HGNC Symbol%3BAcc:HGNC:439]	GO:0016311:dephosphorylation;	GO:0031225:anchored component of membrane;GO:0005576:extracellular region;GO:0005886:plasma membrane;GO:0009986:cell surface;GO:... <Preview truncated at 128 characters>	GO:0004035:alkaline phosphatase activity;GO:0000287:magnesium ion binding;GO:0002020:protease binding;GO:0008270:zinc ion bindin... <Preview truncated at 128 characters>	K01077	;ko00730 Thiamine metabolism;ko00790 Folate biosynthesis;ko01100 Metabolic pathways;ko01240 Biosynthesis of cofactors;
ENSG00000178038	935.197	0.720466	-0.472999	0.0671715	-7.04166	1.89967e-12	3.18356e-11	3	46668995	46693704	-	ALS2CL	ALS2 C-terminal like [Source:HGNC Symbol%3BAcc:HGNC:20605]	GO:0007032:endosome organization;	GO:0005829:cytosol;	GO:0005096:GTPase activator activity;GO:0042802:identical protein binding;	-	-
ENSG00000183684	809.475	1.35157	0.434638	0.0672926	6.45893	1.05445e-10	1.44473e-09	17	81887835	81891586	-	ALYREF	Aly/REF export factor [Source:HGNC Symbol%3BAcc:HGNC:19071]	GO:0006406:mRNA export from nucleus;GO:0000398:mRNA splicing, via spliceosome;GO:0001649:osteoblast differentiation;GO:0032786:p... <Preview truncated at 128 characters>	GO:0071013:catalytic step 2 spliceosome;GO:0005737:cytoplasm;GO:0005829:cytosol;GO:0070062:extracellular exosome;GO:0016020:memb... <Preview truncated at 128 characters>	GO:0003723:RNA binding;	K12881	;ko03013 RNA transport;ko03015 mRNA surveillance pathway;ko03040 Spliceosome;ko05014 Amyotrophic lateral sclerosis;ko05168 Herpe... <Preview truncated at 128 characters>
ENSG00000110497	679.661	0.83202	-0.265311	0.0714882	-3.71125	0.000206238	0.00104435	11	46396414	46594125	-	AMBRA1	autophagy and beclin 1 regulator 1 [Source:HGNC Symbol%3BAcc:HGNC:25990]	GO:0000045:autophagosome assembly;GO:0006914:autophagy;GO:0000422:mitochondrion degradation;GO:0030154:cell differentiation;GO:0... <Preview truncated at 128 characters>	GO:0005776:autophagosome;GO:0005930:axoneme;GO:0005737:cytoplasm;GO:0031410:cytoplasmic vesicle;GO:0005829:cytosol;GO:0043231:in... <Preview truncated at 128 characters>	GO:0051020:GTPase binding;GO:0031625:ubiquitin protein ligase binding;	K17985	;ko04137 Mitophagy - animal;ko04140 Autophagy - animal;ko05010 Alzheimer disease;ko05014 Amyotrophic lateral sclerosis;ko05016 H... <Preview truncated at 128 characters>
ENSG00000123505	2567.4	1.68986	0.756907	0.0492657	15.3638	2.86432e-53	5.44519e-51	6	110874770	110898879	+	AMD1	adenosylmethionine decarboxylase 1 [Source:HGNC Symbol%3BAcc:HGNC:457]	GO:0006595:polyamine metabolic process;GO:0006557:S-adenosylmethioninamine biosynthetic process;GO:0008295:spermidine biosynthet... <Preview truncated at 128 characters>	GO:0005829:cytosol;	GO:0004014:adenosylmethionine decarboxylase activity;GO:0042802:identical protein binding;GO:0019810:putrescine binding;	K01611	;ko00270 Cysteine and methionine metabolism;ko00330 Arginine and proline metabolism;ko01100 Metabolic pathways;
ENSG00000139211	1052.16	1.92312	0.943449	0.0684511	13.7828	3.23342e-43	3.98716e-41	12	47075707	47079959	-	AMIGO2	adhesion molecule with Ig like domain 2 [Source:HGNC Symbol%3BAcc:HGNC:24073]	GO:0007420:brain development;GO:0007157:heterophilic cell-cell adhesion via plasma membrane cell adhesion molecules;GO:0007156:h... <Preview truncated at 128 characters>	GO:0016021:integral component of membrane;GO:0005634:nucleus;GO:0005886:plasma membrane;	-	-	-
ENSG00000101935	1122.83	1.32211	0.402846	0.067875	5.93511	2.9364e-09	3.3853e-08	X	110194186	110440318	-	AMMECR1	AMMECR nuclear protein 1 [Source:HGNC Symbol%3BAcc:HGNC:467]	-	GO:0005634:nucleus;GO:0005739:mitochondrion;GO:0005654:nucleoplasm;	-	K09654	;ko00515 Mannose type O-glycan biosynthesis;ko01100 Metabolic pathways;
ENSG00000126016	527.878	0.368327	-1.44094	0.0861545	-16.7251	8.60671e-63	2.45426e-60	X	112774503	112840831	-	AMOT	angiomotin [Source:HGNC Symbol%3BAcc:HGNC:17810]	GO:0030036:actin cytoskeleton organization;GO:0001525:angiogenesis;GO:0043534:blood vessel endothelial cell migration;GO:0042074... <Preview truncated at 128 characters>	GO:0005884:actin filament;GO:0005923:bicellular tight junction;GO:0030054:cell junction;GO:0009986:cell surface;GO:0005737:cytop... <Preview truncated at 128 characters>	GO:0043532:angiostatin binding;GO:0038023:signaling receptor activity;	K16819	;ko04390 Hippo signaling pathway;ko04530 Tight junction;
ENSG00000166025	4778.91	0.753916	-0.407524	0.0411415	-9.90541	3.94334e-23	1.62819e-21	11	94706431	94876748	+	AMOTL1	angiomotin like 1 [Source:HGNC Symbol%3BAcc:HGNC:17811]	GO:0030036:actin cytoskeleton organization;GO:0001525:angiogenesis;GO:0003365:establishment of cell polarity involved in ameboid... <Preview truncated at 128 characters>	GO:0005923:bicellular tight junction;GO:0031410:cytoplasmic vesicle;GO:0005829:cytosol;GO:0005886:plasma membrane;	GO:0042802:identical protein binding;	K06104	;ko04530 Tight junction;
ENSG00000116337	273.903	1.59794	0.676212	0.108991	6.2043	5.49409e-10	6.92931e-09	1	109616104	109632051	+	AMPD2	adenosine monophosphate deaminase 2 [Source:HGNC Symbol%3BAcc:HGNC:469]	GO:0046033:AMP metabolic process;GO:0052652:cyclic purine nucleotide metabolic process;GO:0097009:energy homeostasis;GO:0006188:... <Preview truncated at 128 characters>	GO:0005829:cytosol;	GO:0003876:AMP deaminase activity;GO:0042802:identical protein binding;GO:0046872:metal ion binding;	K01490	;ko00230 Purine metabolism;ko01100 Metabolic pathways;
ENSG00000133805	235.844	0.736615	-0.441018	0.126446	-3.48781	0.000487002	0.00226556	11	10308313	10507579	+	AMPD3	adenosine monophosphate deaminase 3 [Source:HGNC Symbol%3BAcc:HGNC:470]	GO:0006196:AMP catabolic process;GO:0046033:AMP metabolic process;GO:0006188:IMP biosynthetic process;GO:0032264:IMP salvage;GO:... <Preview truncated at 128 characters>	GO:0005829:cytosol;GO:0005576:extracellular region;GO:0034774:secretory granule lumen;	GO:0003876:AMP deaminase activity;GO:0046872:metal ion binding;	K01490;K04372	;ko00230 Purine metabolism;ko01100 Metabolic pathways;;ko04010 MAPK signaling pathway;ko04066 HIF-1 signaling pathway;ko04910 In... <Preview truncated at 128 characters>
ENSG00000214174	126.193	0.752133	-0.41094	0.162609	-2.52717	0.0114984	0.0364188	17	64966550	64975630	-	AMZ2P1	AMZ2 pseudogene 1 [Source:HGNC Symbol%3BAcc:HGNC:26491]	-	-	GO:0046872:metal ion binding;GO:0008237:metallopeptidase activity;	K06974	-
ENSG00000153107	1870.91	1.3107	0.390338	0.0568047	6.87158	6.34932e-12	1.00937e-10	2	111611639	111884690	-	ANAPC1	anaphase promoting complex subunit 1 [Source:HGNC Symbol%3BAcc:HGNC:19988]	GO:0031145:anaphase-promoting complex-dependent proteasomal ubiquitin-dependent protein catabolic process;GO:0051301:cell divisi... <Preview truncated at 128 characters>	GO:0005680:anaphase-promoting complex;GO:0005829:cytosol;GO:0005654:nucleoplasm;	GO:0060090:binding, bridging;	K03348	;ko04110 Cell cycle;ko04114 Oocyte meiosis;ko04120 Ubiquitin mediated proteolysis;ko04914 Progesterone-mediated oocyte maturatio... <Preview truncated at 128 characters>
ENSG00000053900	690.275	1.22906	0.297556	0.0761536	3.90732	9.33256e-05	0.000510702	4	25377263	25418498	+	ANAPC4	anaphase promoting complex subunit 4 [Source:HGNC Symbol%3BAcc:HGNC:19990]	GO:0031145:anaphase-promoting complex-dependent proteasomal ubiquitin-dependent protein catabolic process;GO:0007049:cell cycle;... <Preview truncated at 128 characters>	GO:0005680:anaphase-promoting complex;GO:0005829:cytosol;GO:0034399:nuclear periphery;GO:0005654:nucleoplasm;GO:0005634:nucleus;	GO:0019903:protein phosphatase binding;GO:0004842:ubiquitin-protein transferase activity;	K03351	;ko04110 Cell cycle;ko04114 Oocyte meiosis;ko04120 Ubiquitin mediated proteolysis;ko04914 Progesterone-mediated oocyte maturatio... <Preview truncated at 128 characters>
ENSG00000196510	1076.95	1.276	0.351623	0.0611143	5.75353	8.74013e-09	9.47194e-08	12	110372900	110403730	-	ANAPC7	anaphase promoting complex subunit 7 [Source:HGNC Symbol%3BAcc:HGNC:17380]	GO:0031145:anaphase-promoting complex-dependent proteasomal ubiquitin-dependent protein catabolic process;GO:0051301:cell divisi... <Preview truncated at 128 characters>	GO:0005680:anaphase-promoting complex;GO:0005737:cytoplasm;GO:0005829:cytosol;GO:0015630:microtubule cytoskeleton;GO:0005654:nuc... <Preview truncated at 128 characters>	GO:0019903:protein phosphatase binding;	K03354	;ko04110 Cell cycle;ko04114 Oocyte meiosis;ko04120 Ubiquitin mediated proteolysis;ko04914 Progesterone-mediated oocyte maturatio... <Preview truncated at 128 characters>
ENSG00000013523	548.098	1.33896	0.421116	0.0807602	5.2144	1.84417e-07	1.63856e-06	14	76786009	76826246	-	ANGEL1	angel homolog 1 [Source:HGNC Symbol%3BAcc:HGNC:19961]	-	GO:0005801:cis-Golgi network;GO:0005829:cytosol;GO:0005783:endoplasmic reticulum;GO:0005634:nucleus;GO:0048471:perinuclear regio... <Preview truncated at 128 characters>	GO:0000175:3-5-exoribonuclease activity;GO:0008190:eukaryotic initiation factor 4E binding;GO:0019904:protein domain specific ... <Preview truncated at 128 characters>	K18729	-
ENSG00000151150	666.86	0.631593	-0.662932	0.0803877	-8.24669	1.62843e-16	4.07109e-15	10	60026298	60733490	-	ANK3	ankyrin 3 [Source:HGNC Symbol%3BAcc:HGNC:494]	GO:0007409:axonogenesis;GO:0071286:cellular response to magnesium ion;GO:0045184:establishment of protein localization;GO:004300... <Preview truncated at 128 characters>	GO:0043194:axon initial segment;GO:0009925:basal plasma membrane;GO:0016323:basolateral plasma membrane;GO:0009986:cell surface;... <Preview truncated at 128 characters>	GO:0045296:cadherin binding;GO:0008093:cytoskeletal adaptor activity;GO:0008092:cytoskeletal protein binding;GO:0030674:protein ... <Preview truncated at 128 characters>	K10380	;ko04624 Toll and Imd signaling pathway;ko05205 Proteoglycans in cancer;
ENSG00000154122	584.578	0.833041	-0.263541	0.0863963	-3.05037	0.00228558	0.00897559	5	14704800	14871778	-	ANKH	ANKH inorganic pyrophosphate transport regulator [Source:HGNC Symbol%3BAcc:HGNC:15492]	GO:0007626:locomotory behavior;GO:0030500:regulation of bone mineralization;GO:0001501:skeletal system development;GO:0055085:tr... <Preview truncated at 128 characters>	GO:0016021:integral component of membrane;GO:0005887:integral component of plasma membrane;GO:0019867:outer membrane;GO:0005886:... <Preview truncated at 128 characters>	GO:0030504:inorganic diphosphate transmembrane transporter activity;GO:0005315:inorganic phosphate transmembrane transporter act... <Preview truncated at 128 characters>	K09228;K17985	;ko05168 Herpes simplex virus 1 infection;;ko04137 Mitophagy - animal;ko04140 Autophagy - animal;ko05010 Alzheimer disease;ko050... <Preview truncated at 128 characters>
ENSG00000106524	1276.84	0.762331	-0.39151	0.0631717	-6.19755	5.73493e-10	7.1933e-09	7	16599779	16645817	-	ANKMY2	ankyrin repeat and MYND domain containing 2 [Source:HGNC Symbol%3BAcc:HGNC:25370]	-	GO:0005929:cilium;	GO:0019899:enzyme binding;GO:0046872:metal ion binding;	-	-
ENSG00000148677	106.877	2.15104	1.10503	0.196548	5.62221	1.88531e-08	1.94279e-07	10	90912096	90921087	-	ANKRD1	ankyrin repeat domain 1 [Source:HGNC Symbol%3BAcc:HGNC:15819]	GO:0055008:cardiac muscle tissue morphogenesis;GO:0035690:cellular response to drug;GO:0071456:cellular response to hypoxia;GO:0... <Preview truncated at 128 characters>	GO:0005737:cytoplasm;GO:0005829:cytosol;GO:0001650:fibrillar center;GO:0031674:I band;GO:0005654:nucleoplasm;GO:0005634:nucleus;... <Preview truncated at 128 characters>	GO:0003677:DNA binding;GO:0042826:histone deacetylase binding;GO:0002039:p53 binding;GO:0070412:R-SMAD binding;GO:0061629:RNA po... <Preview truncated at 128 characters>	-	-
ENSG00000076513	1290.98	0.763381	-0.389525	0.0565684	-6.88591	5.74181e-12	9.16781e-11	12	109999186	110039763	+	ANKRD13A	ankyrin repeat domain 13A [Source:HGNC Symbol%3BAcc:HGNC:21268]	GO:0002091:negative regulation of receptor internalization;	GO:0005737:cytoplasm;GO:0005770:late endosome;GO:0048471:perinuclear region of cytoplasm;GO:0005886:plasma membrane;	-	K12581	;ko03018 RNA degradation;
ENSG00000198720	289.31	1.39759	0.482939	0.108316	4.45862	8.24883e-06	5.51433e-05	17	29589769	29614761	+	ANKRD13B	ankyrin repeat domain 13B [Source:HGNC Symbol%3BAcc:HGNC:26363]	GO:0002091:negative regulation of receptor internalization;	GO:0005737:cytoplasm;GO:0005769:early endosome;GO:0043231:intracellular membrane-bounded organelle;GO:0005770:late endosome;GO:0... <Preview truncated at 128 characters>	-	-	-
ENSG00000152766	382.475	1.73801	0.797433	0.0963216	8.27886	1.24361e-16	3.13479e-15	10	88819896	88851844	-	ANKRD22	ankyrin repeat domain 22 [Source:HGNC Symbol%3BAcc:HGNC:28321]	-	-	-	K19406	-
ENSG00000105186	714.387	1.31776	0.398087	0.0732749	5.43279	5.54799e-08	5.32899e-07	19	32597006	32676597	-	ANKRD27	ankyrin repeat domain 27 [Source:HGNC Symbol%3BAcc:HGNC:25310]	GO:0045022:early endosome to late endosome transport;GO:0032456:endocytic recycling;GO:0035646:endosome to melanosome transport;... <Preview truncated at 128 characters>	GO:0030659:cytoplasmic vesicle membrane;GO:0005829:cytosol;GO:0005769:early endosome;GO:0005770:late endosome;GO:0005764:lysosom... <Preview truncated at 128 characters>	GO:0005085:guanyl-nucleotide exchange factor activity;GO:0031267:small GTPase binding;GO:0000149:SNARE binding;	-	-
ENSG00000154065	185.363	1.89152	0.919546	0.13497	6.81296	9.56119e-12	1.49394e-10	18	23598926	23662911	-	ANKRD29	ankyrin repeat domain 29 [Source:HGNC Symbol%3BAcc:HGNC:27110]	-	-	-	K08898;K02927	-;ko03010 Ribosome;ko04120 Ubiquitin mediated proteolysis;ko04137 Mitophagy - animal;ko05012 Parkinson disease;ko05022 Pathways ... <Preview truncated at 128 characters>
ENSG00000164236	152.139	1.41551	0.501321	0.145723	3.44024	0.000581194	0.00265369	5	10564070	10657816	+	ANKRD33B	ankyrin repeat domain 33B [Source:HGNC Symbol%3BAcc:HGNC:35240]	-	-	-	-	-
ENSG00000154945	1223.33	1.23327	0.302492	0.0677285	4.46625	7.9604e-06	5.33715e-05	17	50693198	50707914	-	ANKRD40	ankyrin repeat domain 40 [Source:HGNC Symbol%3BAcc:HGNC:28233]	-	-	-	K09488	;ko05012 Parkinson disease;ko05022 Pathways of neurodegeneration - multiple diseases;
ENSG00000151458	1110.28	0.675142	-0.566738	0.0698605	-8.11242	4.96206e-16	1.19312e-14	4	124664048	124712732	-	ANKRD50	ankyrin repeat domain containing 50 [Source:HGNC Symbol%3BAcc:HGNC:29223]	GO:0032456:endocytic recycling;GO:0015031:protein transport;	GO:0005768:endosome;	-	-	-
ENSG00000235098	157.601	0.746536	-0.421716	0.154964	-2.72138	0.00650104	0.0222789	1	1418420	1421769	-	ANKRD65	ankyrin repeat domain 65 [Source:HGNC Symbol%3BAcc:HGNC:42950]	-	-	-	-	-
ENSG00000131620	5656.77	1.94223	0.957715	0.0541584	17.6836	5.61006e-70	2.08946e-67	11	69985907	70189530	+	ANO1	anoctamin 1 [Source:HGNC Symbol%3BAcc:HGNC:21625]	GO:0006812:cation transport;GO:0034605:cellular response to heat;GO:1901653:cellular response to peptide;GO:1902476:chloride tra... <Preview truncated at 128 characters>	GO:0016324:apical plasma membrane;GO:0034707:chloride channel complex;GO:0005737:cytoplasm;GO:0070062:extracellular exosome;GO:0... <Preview truncated at 128 characters>	GO:0005227:calcium activated cation channel activity;GO:0005254:chloride channel activity;GO:0005229:intracellular calcium activ... <Preview truncated at 128 characters>	K19496	-
ENSG00000160746	211.862	0.795317	-0.330399	0.124207	-2.66007	0.00781251	0.0261372	3	43354859	43691594	-	ANO10	anoctamin 10 [Source:HGNC Symbol%3BAcc:HGNC:25519]	GO:0006812:cation transport;GO:0006821:chloride transport;GO:0034220:ion transmembrane transport;GO:0055085:transmembrane transp... <Preview truncated at 128 characters>	GO:0016021:integral component of membrane;GO:0043231:intracellular membrane-bounded organelle;GO:0016020:membrane;GO:0005886:pla... <Preview truncated at 128 characters>	GO:0005227:calcium activated cation channel activity;GO:0005229:intracellular calcium activated chloride channel activity;	K19327	-
ENSG00000185101	301.29	0.713837	-0.486334	0.103863	-4.68246	2.83454e-06	2.05279e-05	11	417933	442011	-	ANO9	anoctamin 9 [Source:HGNC Symbol%3BAcc:HGNC:20679]	GO:0061591:calcium activated galactosylceramide scrambling;GO:0061590:calcium activated phosphatidylcholine scrambling;GO:006158... <Preview truncated at 128 characters>	GO:0016021:integral component of membrane;GO:0005886:plasma membrane;	GO:0005254:chloride channel activity;GO:0005229:intracellular calcium activated chloride channel activity;GO:0017128:phospholipi... <Preview truncated at 128 characters>	K19503	-
ENSG00000140350	6058.06	1.32166	0.402356	0.0441867	9.10583	8.56128e-20	2.85116e-18	15	68778535	68820897	-	ANP32A	acidic nuclear phosphoprotein 32 family member A [Source:HGNC Symbol%3BAcc:HGNC:13233]	GO:0035556:intracellular signal transduction;GO:0006913:nucleocytoplasmic transport;GO:0042981:regulation of apoptotic process;	GO:0005737:cytoplasm;GO:0005783:endoplasmic reticulum;GO:0005654:nucleoplasm;GO:0005634:nucleus;GO:0048471:perinuclear region of... <Preview truncated at 128 characters>	GO:0042393:histone binding;GO:0003723:RNA binding;	K18646	-
ENSG00000163297	187.632	1.61017	0.687213	0.130495	5.26618	1.39289e-07	1.25843e-06	4	79901146	80125454	-	ANTXR2	ANTXR cell adhesion molecule 2 [Source:HGNC Symbol%3BAcc:HGNC:21732]	GO:1901998:toxin transport;	GO:0009986:cell surface;GO:0005789:endoplasmic reticulum membrane;GO:0010008:endosome membrane;GO:0005576:extracellular region;G... <Preview truncated at 128 characters>	GO:0046872:metal ion binding;GO:0004888:transmembrane signaling receptor activity;	K08857	-
ENSG00000122359	4451.1	0.693957	-0.527082	0.0431389	-12.2183	2.48368e-34	1.95376e-32	10	80150889	80205572	-	ANXA11	annexin A11 [Source:HGNC Symbol%3BAcc:HGNC:535]	GO:0032506:cytokinetic process;GO:0006909:phagocytosis;GO:0051592:response to calcium ion;	GO:0042582:azurophil granule;GO:0005737:cytoplasm;GO:0005829:cytosol;GO:0042470:melanosome;GO:0030496:midbody;GO:0005635:nuclear... <Preview truncated at 128 characters>	GO:0005509:calcium ion binding;GO:0005544:calcium-dependent phospholipid binding;GO:0048306:calcium-dependent protein binding;GO... <Preview truncated at 128 characters>	K17095;K12756	;ko05014 Amyotrophic lateral sclerosis;;ko04510 Focal adhesion;ko04670 Leukocyte transendothelial migration;ko04810 Regulation o... <Preview truncated at 128 characters>
ENSG00000138772	1461.22	1.34439	0.426955	0.0617265	6.91687	4.61716e-12	7.42406e-11	4	78551747	78610451	+	ANXA3	annexin A3 [Source:HGNC Symbol%3BAcc:HGNC:541]	GO:0031100:organ regeneration;GO:0042742:defense response to bacterium;GO:0021766:hippocampus development;GO:0043312:neutrophil ... <Preview truncated at 128 characters>	GO:0030424:axon;GO:0005737:cytoplasm;GO:0030425:dendrite;GO:0016020:membrane;GO:0043025:neuronal cell body;GO:0030670:phagocytic... <Preview truncated at 128 characters>	GO:0005509:calcium ion binding;GO:0005544:calcium-dependent phospholipid binding;GO:0048306:calcium-dependent protein binding;GO... <Preview truncated at 128 characters>	K17089	-
ENSG00000196975	2820.56	0.694333	-0.526301	0.0533316	-9.86846	5.70345e-23	2.32859e-21	2	69644425	69827112	+	ANXA4	annexin A4 [Source:HGNC Symbol%3BAcc:HGNC:542]	GO:0030855:epithelial cell differentiation;GO:0032717:negative regulation of interleukin-8 production;GO:0032088:negative regula... <Preview truncated at 128 characters>	GO:0016324:apical plasma membrane;GO:0009986:cell surface;GO:0042584:chromaffin granule membrane;GO:0005737:cytoplasm;GO:0005829... <Preview truncated at 128 characters>	GO:0005509:calcium ion binding;GO:0005544:calcium-dependent phospholipid binding;GO:0048306:calcium-dependent protein binding;GO... <Preview truncated at 128 characters>	K17093	-
ENSG00000164111	6064.59	1.20908	0.273913	0.0427735	6.4038	1.51552e-10	2.03519e-09	4	121667946	121696995	-	ANXA5	annexin A5 [Source:HGNC Symbol%3BAcc:HGNC:543]	GO:0007596:blood coagulation;GO:0097211:cellular response to gonadotropin-releasing hormone;GO:0030195:negative regulation of bl... <Preview truncated at 128 characters>	GO:0043679:axon terminus;GO:0042995:cell projection;GO:0005737:cytoplasm;GO:0005829:cytosol;GO:0030425:dendrite;GO:0005783:endop... <Preview truncated at 128 characters>	GO:0005509:calcium ion binding;GO:0005544:calcium-dependent phospholipid binding;GO:0042802:identical protein binding;GO:0005388... <Preview truncated at 128 characters>	K16646	-
ENSG00000265190	3166.69	0.701792	-0.510884	0.0434749	-11.7512	6.95872e-32	4.70358e-30	10	47460162	47484158	-	ANXA8	annexin A8 [Source:HGNC Symbol%3BAcc:HGNC:546]	GO:0007596:blood coagulation;GO:0016197:endosomal transport;GO:0007032:endosome organization;GO:1900138:negative regulation of p... <Preview truncated at 128 characters>	GO:0005737:cytoplasm;GO:0005829:cytosol;GO:0031902:late endosome membrane;GO:0005886:plasma membrane;	GO:0005509:calcium ion binding;GO:0005544:calcium-dependent phospholipid binding;GO:0051015:actin filament binding;GO:0005547:ph... <Preview truncated at 128 characters>	K17096	-
ENSG00000264230	1727.87	0.695063	-0.524783	0.0568944	-9.22382	2.86689e-20	9.7644e-19	10	46375627	46391784	+	ANXA8L1	annexin A8 like 1 [Source:HGNC Symbol%3BAcc:HGNC:23334]	GO:0016197:endosomal transport;GO:0007032:endosome organization;GO:1900138:negative regulation of phospholipase A2 activity;GO:1... <Preview truncated at 128 characters>	GO:0005737:cytoplasm;	GO:0005509:calcium ion binding;GO:0005544:calcium-dependent phospholipid binding;	K17096	-
ENSG00000002726	555.076	0.125957	-2.989	0.189586	-15.7659	5.34086e-56	1.17435e-53	7	150824627	150861504	+	AOC1	amine oxidase copper containing 1 [Source:HGNC Symbol%3BAcc:HGNC:80]	GO:0009308:amine metabolic process;GO:0097185:cellular response to azide;GO:0071280:cellular response to copper ion;GO:0035874:c... <Preview truncated at 128 characters>	GO:0005923:bicellular tight junction;GO:0070062:extracellular exosome;GO:0005576:extracellular region;GO:0005615:extracellular s... <Preview truncated at 128 characters>	GO:0005509:calcium ion binding;GO:0005507:copper ion binding;GO:0052597:diamine oxidase activity;GO:0008201:heparin binding;GO:0... <Preview truncated at 128 characters>	K11182	;ko00330 Arginine and proline metabolism;ko00340 Histidine metabolism;ko00380 Tryptophan metabolism;ko01100 Metabolic pathways;
ENSG00000148120	919.5	0.768949	-0.37904	0.0654657	-5.7899	7.04282e-09	7.72425e-08	9	94726699	95087159	+	AOPEP	aminopeptidase O (putative) [Source:HGNC Symbol%3BAcc:HGNC:1361]	GO:0006508:proteolysis;	GO:0005829:cytosol;GO:0005730:nucleolus;GO:0005737:cytoplasm;	GO:0070006:metalloaminopeptidase activity;GO:0008270:zinc ion binding;GO:0004177:aminopeptidase activity;	K09606	-
ENSG00000138660	876.777	1.35963	0.443214	0.068914	6.43141	1.26427e-10	1.71165e-09	4	112231740	112273110	+	AP1AR	adaptor related protein complex 1 associated regulatory protein [Source:HGNC Symbol%3BAcc:HGNC:28808]	GO:0034613:cellular protein localization;GO:2000146:negative regulation of cell motility;GO:0001920:negative regulation of recep... <Preview truncated at 128 characters>	GO:0005829:cytosol;GO:0005769:early endosome;GO:0005768:endosome;GO:0005794:Golgi apparatus;GO:0005770:late endosome;GO:0030133:... <Preview truncated at 128 characters>	GO:0035650:AP-1 adaptor complex binding;GO:0019894:kinesin binding;	-	-
ENSG00000106367	962.617	1.26044	0.333923	0.0696937	4.7913	1.65707e-06	1.2538e-05	7	101154456	101161596	+	AP1S1	adaptor related protein complex 1 subunit sigma 1 [Source:HGNC Symbol%3BAcc:HGNC:559]	GO:0006886:intracellular protein transport;GO:0006898:receptor-mediated endocytosis;GO:0009615:response to virus;GO:0016192:vesi... <Preview truncated at 128 characters>	GO:0030121:AP-1 adaptor complex;GO:0005905:coated pit;GO:0030659:cytoplasmic vesicle membrane;GO:0005829:cytosol;GO:0005794:Golg... <Preview truncated at 128 characters>	GO:0035615:clathrin adaptor activity;	K12394	;ko04142 Lysosome;ko05170 Human immunodeficiency virus 1 infection;
ENSG00000182287	501.007	1.49878	0.583789	0.0869313	6.71552	1.87392e-11	2.8055e-10	X	15825806	15854931	-	AP1S2	adaptor related protein complex 1 subunit sigma 2 [Source:HGNC Symbol%3BAcc:HGNC:560]	GO:0006886:intracellular protein transport;GO:0016192:vesicle-mediated transport;GO:0006898:receptor-mediated endocytosis;GO:000... <Preview truncated at 128 characters>	GO:0030121:AP-1 adaptor complex;GO:0030119:AP-type membrane coat adaptor complex;GO:0005905:coated pit;GO:0030659:cytoplasmic ve... <Preview truncated at 128 characters>	GO:0035615:clathrin adaptor activity;	K12394	;ko04142 Lysosome;ko05170 Human immunodeficiency virus 1 infection;
ENSG00000152056	1084.61	0.694794	-0.525344	0.0595522	-8.82156	1.12873e-18	3.39924e-17	2	223667680	223838027	-	AP1S3	adaptor related protein complex 1 subunit sigma 3 [Source:HGNC Symbol%3BAcc:HGNC:18971]	GO:0006605:protein targeting;GO:0016192:vesicle-mediated transport;	GO:0030121:AP-1 adaptor complex;GO:0005905:coated pit;GO:0030659:cytoplasmic vesicle membrane;GO:0005829:cytosol;GO:0000139:Golg... <Preview truncated at 128 characters>	GO:0035615:clathrin adaptor activity;	K12395;K09113;K11447	;ko04142 Lysosome;ko05170 Human immunodeficiency virus 1 infection;;ko04931 Insulin resistance;ko04932 Non-alcoholic fatty liver... <Preview truncated at 128 characters>
ENSG00000070718	795.687	1.57036	0.651091	0.0668412	9.74087	2.01811e-22	7.77014e-21	8	42152946	42171673	+	AP3M2	adaptor related protein complex 3 subunit mu 2 [Source:HGNC Symbol%3BAcc:HGNC:570]	GO:0008089:anterograde axon cargo transport;GO:0048490:anterograde synaptic vesicle transport;GO:0006897:endocytosis;GO:0006886:... <Preview truncated at 128 characters>	GO:0030119:AP-type membrane coat adaptor complex;GO:1904115:axon cytoplasm;GO:0030131:clathrin adaptor complex;GO:0031410:cytopl... <Preview truncated at 128 characters>	-	K12398	;ko04142 Lysosome;
ENSG00000154856	337.651	0.277623	-1.8488	0.115803	-15.965	2.23955e-57	5.30803e-55	18	10454635	10489949	+	APCDD1	APC down-regulated 1 [Source:HGNC Symbol%3BAcc:HGNC:15718]	GO:0001942:hair follicle development;GO:0030178:negative regulation of Wnt signaling pathway;GO:0016055:Wnt signaling pathway;	GO:0005887:integral component of plasma membrane;GO:0005886:plasma membrane;	GO:0042802:identical protein binding;GO:0017147:Wnt-protein binding;	K17985;K14443	;ko04137 Mitophagy - animal;ko04140 Autophagy - animal;ko05010 Alzheimer disease;ko05014 Amyotrophic lateral sclerosis;ko05016 H... <Preview truncated at 128 characters>
ENSG00000164062	1189.26	1.30208	0.380814	0.0574506	6.62854	3.39014e-11	4.90254e-10	3	49674014	49683971	+	APEH	acylaminoacyl-peptide hydrolase [Source:HGNC Symbol%3BAcc:HGNC:586]	GO:0050435:beta-amyloid metabolic process;GO:0006508:proteolysis;GO:0006415:translational termination;	GO:0005829:cytosol;GO:0070062:extracellular exosome;GO:0005576:extracellular region;GO:0031965:nuclear membrane;	GO:0042802:identical protein binding;GO:0008242:omega peptidase activity;GO:0003723:RNA binding;GO:0004252:serine-type endopepti... <Preview truncated at 128 characters>	K01303	-
ENSG00000100823	4726.38	1.25058	0.322592	0.0416891	7.73803	1.00968e-14	2.13025e-13	14	20455191	20457772	+	APEX1	apurinic/apyrimidinic endodeoxyribonuclease 1 [Source:HGNC Symbol%3BAcc:HGNC:587]	GO:0007568:aging;GO:0006284:base-excision repair;GO:0006287:base-excision repair, gap-filling;GO:0045454:cell redox homeostasis;... <Preview truncated at 128 characters>	GO:0005813:centrosome;GO:0000781:chromosome, telomeric region;GO:0005737:cytoplasm;GO:0005783:endoplasmic reticulum;GO:0005739:m... <Preview truncated at 128 characters>	GO:0008408:3-5 exonuclease activity;GO:0031490:chromatin DNA binding;GO:0003684:damaged DNA binding;GO:0003677:DNA binding;GO:... <Preview truncated at 128 characters>	K10771	;ko03410 Base excision repair;
ENSG00000169188	602.004	1.28648	0.363429	0.0873629	4.15999	3.1826e-05	0.000191187	X	55000363	55009057	+	APEX2	apurinic/apyrimidinic endodeoxyribonuclease 2 [Source:HGNC Symbol%3BAcc:HGNC:17889]	GO:0006284:base-excision repair;GO:0007049:cell cycle;GO:0006310:DNA recombination;	GO:0001650:fibrillar center;GO:0043231:intracellular membrane-bounded organelle;GO:0005739:mitochondrion;GO:0005654:nucleoplasm;... <Preview truncated at 128 characters>	GO:0003677:DNA binding;GO:0003906:DNA-(apurinic or apyrimidinic site) lyase activity;GO:0008311:double-stranded DNA 3-5 exodeo... <Preview truncated at 128 characters>	K10772	;ko03410 Base excision repair;
ENSG00000244509	2478.2	1.44608	0.532151	0.044748	11.8922	1.29951e-32	9.37395e-31	22	39014257	39020352	+	APOBEC3C	apolipoprotein B mRNA editing enzyme catalytic subunit 3C [Source:HGNC Symbol%3BAcc:HGNC:17353]	GO:0009972:cytidine deamination;GO:0016554:cytidine to uridine editing;GO:0051607:defense response to virus;GO:0070383:DNA cytos... <Preview truncated at 128 characters>	GO:0005737:cytoplasm;GO:0005634:nucleus;GO:0000932:cytoplasmic mRNA processing body;	GO:0004126:cytidine deaminase activity;GO:0047844:deoxycytidine deaminase activity;GO:0003723:RNA binding;GO:0008270:zinc ion bi... <Preview truncated at 128 characters>	K18750	;ko05170 Human immunodeficiency virus 1 infection;
ENSG00000128394	473.241	1.20023	0.263316	0.0869881	3.02703	0.00246967	0.00961215	22	39040604	39055972	+	APOBEC3F	apolipoprotein B mRNA editing enzyme catalytic subunit 3F [Source:HGNC Symbol%3BAcc:HGNC:17356]	GO:0016553:base conversion or substitution editing;GO:0016554:cytidine to uridine editing;GO:0051607:defense response to virus;G... <Preview truncated at 128 characters>	GO:0030895:apolipoprotein B mRNA editing enzyme complex;GO:0005737:cytoplasm;GO:0005634:nucleus;GO:0000932:cytoplasmic mRNA proc... <Preview truncated at 128 characters>	GO:0004126:cytidine deaminase activity;GO:0047844:deoxycytidine deaminase activity;GO:0042802:identical protein binding;GO:00037... <Preview truncated at 128 characters>	K18750	;ko05170 Human immunodeficiency virus 1 infection;
ENSG00000100342	185.499	0.487538	-1.03641	0.159155	-6.51198	7.41655e-11	1.03086e-09	22	36253071	36267530	+	APOL1	apolipoprotein L1 [Source:HGNC Symbol%3BAcc:HGNC:618]	GO:1902476:chloride transmembrane transport;GO:0008203:cholesterol metabolic process;GO:0051838:cytolysis by host of symbiont ce... <Preview truncated at 128 characters>	GO:0072562:blood microparticle;GO:0005788:endoplasmic reticulum lumen;GO:0005576:extracellular region;GO:0005615:extracellular s... <Preview truncated at 128 characters>	GO:0005254:chloride channel activity;GO:0008289:lipid binding;	K14480	-
ENSG00000221963	1969.45	0.743081	-0.428408	0.0492641	-8.69616	3.43309e-18	9.96088e-17	22	35648446	35668404	+	APOL6	apolipoprotein L6 [Source:HGNC Symbol%3BAcc:HGNC:14870]	GO:0006869:lipid transport;GO:0042157:lipoprotein metabolic process;	GO:0005737:cytoplasm;GO:0005576:extracellular region;	GO:0008289:lipid binding;	K14480	-
ENSG00000184831	310.193	1.26906	0.343765	0.100995	3.40377	0.000664624	0.00298901	X	23833353	23907938	-	APOO	apolipoprotein O [Source:HGNC Symbol%3BAcc:HGNC:28727]	GO:0042407:cristae formation;GO:0007007:inner mitochondrial membrane organization;GO:0006869:lipid transport;	GO:0005829:cytosol;GO:0005789:endoplasmic reticulum membrane;GO:0005576:extracellular region;GO:0005615:extracellular space;GO:0... <Preview truncated at 128 characters>	-	-	-
ENSG00000062725	920.466	0.819558	-0.287082	0.0677831	-4.2353	2.28247e-05	0.000140347	17	60443158	60526242	-	APPBP2	amyloid beta precursor protein binding protein 2 [Source:HGNC Symbol%3BAcc:HGNC:622]	GO:0006886:intracellular protein transport;GO:0046907:intracellular transport;GO:0043161:proteasome-mediated ubiquitin-dependent... <Preview truncated at 128 characters>	GO:0031462:Cul2-RING ubiquitin ligase complex;GO:0005737:cytoplasm;GO:0030659:cytoplasmic vesicle membrane;GO:0005874:microtubul... <Preview truncated at 128 characters>	GO:0003777:microtubule motor activity;	K12022;K15696	-
ENSG00000198931	410.775	1.278	0.353887	0.0888566	3.98268	6.81435e-05	0.000382182	16	88809339	88811937	-	APRT	adenine phosphoribosyltransferase [Source:HGNC Symbol%3BAcc:HGNC:626]	GO:0006168:adenine salvage;GO:0044209:AMP salvage;GO:0032869:cellular response to insulin stimulus;GO:0007625:grooming behavior;... <Preview truncated at 128 characters>	GO:0005737:cytoplasm;GO:0005829:cytosol;GO:0070062:extracellular exosome;GO:0005576:extracellular region;GO:0005654:nucleoplasm;... <Preview truncated at 128 characters>	GO:0002055:adenine binding;GO:0003999:adenine phosphoribosyltransferase activity;GO:0016208:AMP binding;	K00759	;ko00230 Purine metabolism;ko01100 Metabolic pathways;
ENSG00000165272	1312.41	0.767119	-0.382479	0.109211	-3.50219	0.000461454	0.00216214	9	33441156	33447596	-	AQP3	aquaporin 3 (Gill blood group) [Source:HGNC Symbol%3BAcc:HGNC:636]	GO:0071456:cellular response to hypoxia;GO:0015793:glycerol transport;GO:0042476:odontogenesis;GO:0002684:positive regulation of... <Preview truncated at 128 characters>	GO:0016323:basolateral plasma membrane;GO:0005911:cell-cell junction;GO:0005737:cytoplasm;GO:0016021:integral component of membr... <Preview truncated at 128 characters>	GO:0015254:glycerol channel activity;GO:0042802:identical protein binding;GO:0015204:urea transmembrane transporter activity;GO:... <Preview truncated at 128 characters>	K09876	;ko04962 Vasopressin-regulated water reabsorption;
ENSG00000109321	125.493	1.82119	0.864885	0.176817	4.89142	1.00113e-06	7.84481e-06	4	74445136	74455005	+	AREG	amphiregulin [Source:HGNC Symbol%3BAcc:HGNC:651]	GO:0007267:cell-cell signaling;GO:0060598:dichotomous subdivision of terminal units involved in mammary gland duct morphogenesis... <Preview truncated at 128 characters>	GO:0009986:cell surface;GO:0030669:clathrin-coated endocytic vesicle membrane;GO:0005789:endoplasmic reticulum membrane;GO:00331... <Preview truncated at 128 characters>	GO:0005125:cytokine activity;GO:0005154:epidermal growth factor receptor binding;GO:0008083:growth factor activity;	K09782	;ko04010 MAPK signaling pathway;ko04012 ErbB signaling pathway;ko04151 PI3K-Akt signaling pathway;ko04390 Hippo signaling pathwa... <Preview truncated at 128 characters>
ENSG00000168374	1927.15	1.26822	0.342805	0.051981	6.59481	4.25787e-11	6.09938e-10	3	57571363	57598220	-	ARF4	ADP ribosylation factor 4 [Source:HGNC Symbol%3BAcc:HGNC:655]	GO:0031584:activation of phospholipase D activity;GO:0045176:apical protein localization;GO:0007420:brain development;GO:0016477... <Preview truncated at 128 characters>	GO:0005829:cytosol;GO:0043197:dendritic spine;GO:0070062:extracellular exosome;GO:0005794:Golgi apparatus;GO:0016020:membrane;GO... <Preview truncated at 128 characters>	GO:0005154:epidermal growth factor receptor binding;GO:0005525:GTP binding;GO:0003924:GTPase activity;GO:0005085:guanyl-nucleoti... <Preview truncated at 128 characters>	K07939	;ko04144 Endocytosis;
ENSG00000066777	2240.27	0.796032	-0.329102	0.0595844	-5.52328	3.32725e-08	3.31368e-07	8	67173511	67343781	-	ARFGEF1	ADP ribosylation factor guanine nucleotide exchange factor 1 [Source:HGNC Symbol%3BAcc:HGNC:15772]	GO:0010256:endomembrane system organization;GO:0006887:exocytosis;GO:0007030:Golgi organization;GO:0030837:negative regulation o... <Preview truncated at 128 characters>	GO:0005829:cytosol;GO:0005794:Golgi apparatus;GO:0000139:Golgi membrane;GO:0016363:nuclear matrix;GO:0005730:nucleolus;GO:000565... <Preview truncated at 128 characters>	GO:0005085:guanyl-nucleotide exchange factor activity;GO:0017022:myosin binding;GO:0034237:protein kinase A regulatory subunit b... <Preview truncated at 128 characters>	K18442	;ko04144 Endocytosis;
ENSG00000132254	1024.42	1.26713	0.341569	0.0650247	5.25291	1.49718e-07	1.34665e-06	11	6474683	6481479	-	ARFIP2	ADP ribosylation factor interacting protein 2 [Source:HGNC Symbol%3BAcc:HGNC:17160]	GO:0030036:actin cytoskeleton organization;GO:0006914:autophagy;GO:0006886:intracellular protein transport;GO:0030032:lamellipod... <Preview truncated at 128 characters>	GO:0005938:cell cortex;GO:0005737:cytoplasm;GO:0005829:cytosol;GO:0005886:plasma membrane;GO:0001726:ruffle;GO:0032588:trans-Gol... <Preview truncated at 128 characters>	GO:0045296:cadherin binding;GO:0005525:GTP binding;GO:0030742:GTP-dependent protein binding;GO:0042802:identical protein binding... <Preview truncated at 128 characters>	K17985	;ko04137 Mitophagy - animal;ko04140 Autophagy - animal;ko05010 Alzheimer disease;ko05014 Amyotrophic lateral sclerosis;ko05016 H... <Preview truncated at 128 characters>
ENSG00000146376	931.825	1.1968	0.259187	0.0733837	3.53195	0.000412512	0.00195592	6	129576132	129710177	-	ARHGAP18	Rho GTPase activating protein 18 [Source:HGNC Symbol%3BAcc:HGNC:21035]	GO:0032956:regulation of actin cytoskeleton organization;GO:0030833:regulation of actin filament polymerization;GO:2000145:regul... <Preview truncated at 128 characters>	GO:0005737:cytoplasm;GO:0005881:cytoplasmic microtubule;GO:0005829:cytosol;GO:0016607:nuclear speck;GO:0005886:plasma membrane;G... <Preview truncated at 128 characters>	GO:0045296:cadherin binding;GO:0005096:GTPase activator activity;	-	-
ENSG00000275832	12427.6	0.69891	-0.516822	0.0383421	-13.4792	2.07209e-41	2.29186e-39	17	38419280	38512385	+	ARHGAP23	Rho GTPase activating protein 23 [Source:HGNC Symbol%3BAcc:HGNC:29293]	GO:0051056:regulation of small GTPase mediated signal transduction;GO:0007165:signal transduction;	GO:0005829:cytosol;GO:0070062:extracellular exosome;	GO:0005096:GTPase activator activity;	-	-
ENSG00000165895	726.208	0.755539	-0.404422	0.0717337	-5.63783	1.72206e-08	1.78464e-07	11	100687288	100993941	+	ARHGAP42	Rho GTPase activating protein 42 [Source:HGNC Symbol%3BAcc:HGNC:26545]	GO:0090630:activation of GTPase activity;GO:0035024:negative regulation of Rho protein signal transduction;GO:0003085:negative r... <Preview truncated at 128 characters>	-	GO:0005096:GTPase activator activity;	-	-
ENSG00000141522	1368.68	1.3481	0.430925	0.0694934	6.20095	5.61243e-10	7.05173e-09	17	81867721	81871378	-	ARHGDIA	Rho GDP dissociation inhibitor alpha [Source:HGNC Symbol%3BAcc:HGNC:678]	GO:0071260:cellular response to mechanical stimulus;GO:0071407:cellular response to organic cyclic compound;GO:0071461:cellular ... <Preview truncated at 128 characters>	GO:0005856:cytoskeleton;GO:0005829:cytosol;GO:0070062:extracellular exosome;GO:0001772:immunological synapse;GO:0016020:membrane... <Preview truncated at 128 characters>	GO:0005504:fatty acid binding;GO:0005096:GTPase activator activity;GO:0051879:Hsp90 protein binding;GO:0019901:protein kinase bi... <Preview truncated at 128 characters>	K12462	;ko04722 Neurotrophin signaling pathway;ko04962 Vasopressin-regulated water reabsorption;
ENSG00000076928	644.296	1.24029	0.310676	0.0832446	3.73209	0.000189897	0.000968589	19	41883173	41930150	+	ARHGEF1	Rho guanine nucleotide exchange factor 1 [Source:HGNC Symbol%3BAcc:HGNC:681]	GO:0007186:G-protein coupled receptor signaling pathway;GO:0051056:regulation of small GTPase mediated signal transduction;GO:00... <Preview truncated at 128 characters>	GO:0005737:cytoplasm;GO:0005829:cytosol;GO:0005886:plasma membrane;GO:0016020:membrane;	GO:0001664:G-protein coupled receptor binding;GO:0005085:guanyl-nucleotide exchange factor activity;GO:0003723:RNA binding;	K12330	;ko04270 Vascular smooth muscle contraction;ko04611 Platelet activation;ko04810 Regulation of actin cytoskeleton;ko04928 Parathy... <Preview truncated at 128 characters>
ENSG00000196914	5080.79	0.747734	-0.419404	0.0376819	-11.1301	8.95316e-29	5.13821e-27	11	120336413	120489937	+	ARHGEF12	Rho guanine nucleotide exchange factor 12 [Source:HGNC Symbol%3BAcc:HGNC:14193]	GO:0007186:G-protein coupled receptor signaling pathway;GO:0051056:regulation of small GTPase mediated signal transduction;GO:00... <Preview truncated at 128 characters>	GO:0005737:cytoplasm;GO:0005829:cytosol;GO:0070062:extracellular exosome;GO:0016020:membrane;	GO:0001664:G-protein coupled receptor binding;GO:0005085:guanyl-nucleotide exchange factor activity;	K07532	;ko04270 Vascular smooth muscle contraction;ko04360 Axon guidance;ko04361 Axon regeneration;ko04611 Platelet activation;ko04625 ... <Preview truncated at 128 characters>
ENSG00000104880	922.167	0.778304	-0.361593	0.0658325	-5.49263	3.95999e-08	3.89594e-07	19	7348937	7472485	+	ARHGEF18	Rho/Rac guanine nucleotide exchange factor 18 [Source:HGNC Symbol%3BAcc:HGNC:17090]	GO:0030036:actin cytoskeleton organization;GO:0051497:negative regulation of stress fiber assembly;GO:0008360:regulation of cell... <Preview truncated at 128 characters>	GO:0045177:apical part of cell;GO:0016324:apical plasma membrane;GO:0030054:cell junction;GO:0005856:cytoskeleton;GO:0005829:cyt... <Preview truncated at 128 characters>	GO:0005085:guanyl-nucleotide exchange factor activity;GO:0046872:metal ion binding;	-	-
ENSG00000116584	831.515	1.26248	0.336259	0.0704537	4.77277	1.8171e-06	1.36246e-05	1	155946851	156007070	-	ARHGEF2	Rho/Rac guanine nucleotide exchange factor 2 [Source:HGNC Symbol%3BAcc:HGNC:682]	GO:0007015:actin filament organization;GO:0055059:asymmetric neuroblast division;GO:0007049:cell cycle;GO:0000902:cell morphogen... <Preview truncated at 128 characters>	GO:0005923:bicellular tight junction;GO:0005737:cytoplasm;GO:0031410:cytoplasmic vesicle;GO:0005856:cytoskeleton;GO:0005829:cyto... <Preview truncated at 128 characters>	GO:0005085:guanyl-nucleotide exchange factor activity;GO:0008017:microtubule binding;GO:0031267:small GTPase binding;GO:0008134:... <Preview truncated at 128 characters>	K12791	;ko04530 Tight junction;ko05130 Pathogenic Escherichia coli infection;ko05131 Shigellosis;ko05418 Fluid shear stress and atheros... <Preview truncated at 128 characters>
ENSG00000214944	868.229	0.802073	-0.318195	0.0671944	-4.73545	2.18573e-06	1.6189e-05	5	73626158	73941993	+	ARHGEF28	Rho guanine nucleotide exchange factor 28 [Source:HGNC Symbol%3BAcc:HGNC:30322]	GO:0030154:cell differentiation;GO:0000902:cell morphogenesis;GO:0048013:ephrin receptor signaling pathway;GO:0035556:intracellu... <Preview truncated at 128 characters>	GO:0005829:cytosol;GO:0005886:plasma membrane;	GO:0005085:guanyl-nucleotide exchange factor activity;GO:0046872:metal ion binding;GO:0003723:RNA binding;	K16529;K05725	;ko04928 Parathyroid hormone synthesis, secretion and action;ko05163 Human cytomegalovirus infection;;ko01522 Endocrine resistan... <Preview truncated at 128 characters>
ENSG00000183111	497.228	0.762013	-0.392113	0.0862794	-4.54468	5.50184e-06	3.80479e-05	5	149551947	149634968	+	ARHGEF37	Rho guanine nucleotide exchange factor 37 [Source:HGNC Symbol%3BAcc:HGNC:34430]	-	GO:0005737:cytoplasm;	GO:0005085:guanyl-nucleotide exchange factor activity;	-	-
ENSG00000137135	305.699	0.806974	-0.309406	0.103911	-2.97759	0.0029052	0.0110458	9	35658875	35675866	-	ARHGEF39	Rho guanine nucleotide exchange factor 39 [Source:HGNC Symbol%3BAcc:HGNC:25909]	GO:0030335:positive regulation of cell migration;	GO:0005886:plasma membrane;	GO:0005085:guanyl-nucleotide exchange factor activity;	K01368;K09228;K01672	;ko04142 Lysosome;ko04145 Phagosome;ko04210 Apoptosis;ko04612 Antigen processing and presentation;ko05152 Tuberculosis;;ko05168 ... <Preview truncated at 128 characters>
ENSG00000165801	263.848	0.66274	-0.593486	0.109879	-5.40124	6.61801e-08	6.28401e-07	14	21070273	21090248	+	ARHGEF40	Rho guanine nucleotide exchange factor 40 [Source:HGNC Symbol%3BAcc:HGNC:25516]	GO:0051056:regulation of small GTPase mediated signal transduction;	GO:0005829:cytosol;GO:0005886:plasma membrane;	GO:0005085:guanyl-nucleotide exchange factor activity;	-	-
ENSG00000129675	121.797	0.562221	-0.830791	0.165828	-5.00996	5.44422e-07	4.45547e-06	X	136665547	136780932	-	ARHGEF6	Rac/Cdc42 guanine nucleotide exchange factor 6 [Source:HGNC Symbol%3BAcc:HGNC:685]	GO:0006915:apoptotic process;GO:0007254:JNK cascade;GO:0030032:lamellipodium assembly;	GO:0005829:cytosol;GO:0030027:lamellipodium;	GO:0005096:GTPase activator activity;GO:0005085:guanyl-nucleotide exchange factor activity;	K05729	;ko04810 Regulation of actin cytoskeleton;ko05212 Pancreatic cancer;
ENSG00000179361	225.318	1.45647	0.542476	0.124454	4.35885	1.30748e-05	8.45551e-05	15	74541206	74598131	+	ARID3B	AT-rich interaction domain 3B [Source:HGNC Symbol%3BAcc:HGNC:14350]	GO:0045944:positive regulation of transcription from RNA polymerase II promoter;GO:0006357:regulation of transcription from RNA ... <Preview truncated at 128 characters>	GO:0005654:nucleoplasm;GO:0005634:nucleus;	GO:0003677:DNA binding;	K17985	;ko04137 Mitophagy - animal;ko04140 Autophagy - animal;ko05010 Alzheimer disease;ko05014 Amyotrophic lateral sclerosis;ko05016 H... <Preview truncated at 128 characters>
ENSG00000150347	1060.99	0.486838	-1.03848	0.0697171	-14.8957	3.51466e-50	5.88464e-48	10	61901684	62096944	+	ARID5B	AT-rich interaction domain 5B [Source:HGNC Symbol%3BAcc:HGNC:17362]	GO:0060612:adipose tissue development;GO:0030325:adrenal gland development;GO:0048468:cell development;GO:0060325:face morphogen... <Preview truncated at 128 characters>	GO:0005654:nucleoplasm;GO:0005634:nucleus;	GO:0003677:DNA binding;GO:0000976:transcription regulatory region sequence-specific DNA binding;GO:0003713:transcription coactiv... <Preview truncated at 128 characters>	-	-
ENSG00000177479	1251.2	1.30557	0.384678	0.0569623	6.7532	1.44623e-11	2.19398e-10	3	48918821	48986382	+	ARIH2	ariadne RBR E3 ubiquitin protein ligase 2 [Source:HGNC Symbol%3BAcc:HGNC:690]	GO:0048588:developmental cell growth;GO:0071425:hematopoietic stem cell proliferation;GO:0007275:multicellular organismal develo... <Preview truncated at 128 characters>	GO:0005737:cytoplasm;GO:0005654:nucleoplasm;GO:0005634:nucleus;GO:0000151:ubiquitin ligase complex;GO:0005829:cytosol;GO:0070062... <Preview truncated at 128 characters>	GO:0031624:ubiquitin conjugating enzyme binding;GO:0061630:ubiquitin protein ligase activity;GO:0004842:ubiquitin-protein transf... <Preview truncated at 128 characters>	K11969;K17985	-;ko04137 Mitophagy - animal;ko04140 Autophagy - animal;ko05010 Alzheimer disease;ko05014 Amyotrophic lateral sclerosis;ko05016 ... <Preview truncated at 128 characters>
ENSG00000179674	207.82	0.72767	-0.458643	0.129671	-3.53698	0.00040473	0.00192553	3	160677160	160678448	+	ARL14	ADP ribosylation factor like GTPase 14 [Source:HGNC Symbol%3BAcc:HGNC:22974]	GO:0006886:intracellular protein transport;GO:0016192:vesicle-mediated transport;	GO:0031410:cytoplasmic vesicle;GO:0005886:plasma membrane;	GO:0005525:GTP binding;GO:0003924:GTPase activity;	K17200	-
ENSG00000185305	268.217	0.826789	-0.274408	0.113688	-2.41369	0.0157918	0.0477016	5	53883942	54310582	-	ARL15	ADP ribosylation factor like GTPase 15 [Source:HGNC Symbol%3BAcc:HGNC:25945]	-	GO:0070062:extracellular exosome;	GO:0005525:GTP binding;GO:0003924:GTPase activity;	K17201	-
ENSG00000102931	398.031	1.33803	0.420112	0.0943921	4.45071	8.5588e-06	5.70482e-05	16	57245259	57253635	+	ARL2BP	ADP ribosylation factor like GTPase 2 binding protein [Source:HGNC Symbol%3BAcc:HGNC:17146]	GO:0051457:maintenance of protein location in nucleus;GO:0042531:positive regulation of tyrosine phosphorylation of STAT protein... <Preview truncated at 128 characters>	GO:0005813:centrosome;GO:0005929:cilium;GO:0005829:cytosol;GO:0030496:midbody;GO:0005758:mitochondrial intermembrane space;GO:00... <Preview truncated at 128 characters>	GO:0030695:GTPase regulator activity;GO:0003713:transcription coactivator activity;	K16742	-
ENSG00000122644	362.193	1.3121	0.391881	0.0964831	4.06165	4.87263e-05	0.000282393	7	12686856	12690958	+	ARL4A	ADP ribosylation factor like GTPase 4A [Source:HGNC Symbol%3BAcc:HGNC:695]	GO:0050873:brown fat cell differentiation;GO:0006886:intracellular protein transport;GO:0016192:vesicle-mediated transport;	GO:0005829:cytosol;GO:0005730:nucleolus;GO:0005654:nucleoplasm;GO:0005634:nucleus;GO:0005886:plasma membrane;	GO:0005525:GTP binding;GO:0003924:GTPase activity;	K07945	-
ENSG00000188042	1506.05	1.61697	0.693296	0.061543	11.2652	1.94845e-29	1.16588e-27	2	234493041	234497081	-	ARL4C	ADP ribosylation factor like GTPase 4C [Source:HGNC Symbol%3BAcc:HGNC:698]	GO:0032456:endocytic recycling;GO:0006886:intracellular protein transport;GO:0016192:vesicle-mediated transport;	GO:0005737:cytoplasm;GO:0005829:cytosol;GO:0030175:filopodium;GO:0005634:nucleus;GO:0005886:plasma membrane;	GO:0043014:alpha-tubulin binding;GO:0005525:GTP binding;GO:0003924:GTPase activity;	K07945	-
ENSG00000175906	272.203	1.3887	0.473736	0.109283	4.33493	1.45805e-05	9.32026e-05	17	43398993	43401137	+	ARL4D	ADP ribosylation factor like GTPase 4D [Source:HGNC Symbol%3BAcc:HGNC:656]	GO:0006886:intracellular protein transport;GO:0009306:protein secretion;GO:0016192:vesicle-mediated transport;	GO:0005737:cytoplasm;GO:0005730:nucleolus;GO:0005886:plasma membrane;	GO:0005525:GTP binding;GO:0003924:GTPase activity;	K07945	-
ENSG00000162980	691.91	1.2133	0.27894	0.0717599	3.88713	0.000101435	0.000549478	2	151788984	151828492	-	ARL5A	ADP ribosylation factor like GTPase 5A [Source:HGNC Symbol%3BAcc:HGNC:696]	GO:0006886:intracellular protein transport;GO:1903292:protein localization to Golgi membrane;GO:0016192:vesicle-mediated transpo... <Preview truncated at 128 characters>	GO:0005802:trans-Golgi network;	GO:0005525:GTP binding;GO:0003924:GTPase activity;	K07949	-
ENSG00000165997	1299	1.20285	0.26646	0.0582449	4.57482	4.76624e-06	3.32404e-05	10	18659431	18681639	+	ARL5B	ADP ribosylation factor like GTPase 5B [Source:HGNC Symbol%3BAcc:HGNC:23052]	GO:0006886:intracellular protein transport;GO:1903292:protein localization to Golgi membrane;GO:0016192:vesicle-mediated transpo... <Preview truncated at 128 characters>	GO:0005802:trans-Golgi network;	GO:0005525:GTP binding;GO:0003924:GTPase activity;	K07950	-
ENSG00000113966	293.249	1.34761	0.430406	0.105059	4.09682	4.18873e-05	0.000245407	3	97764521	97801229	+	ARL6	ADP ribosylation factor like GTPase 6 [Source:HGNC Symbol%3BAcc:HGNC:13210]	GO:0030030:cell projection organization;GO:0051258:protein polymerization;GO:0006612:protein targeting to membrane;	GO:0005879:axonemal microtubule;GO:0005930:axoneme;GO:0060170:ciliary membrane;GO:0030117:membrane coat;	GO:0005525:GTP binding;GO:0003924:GTPase activity;GO:0046872:metal ion binding;GO:0005543:phospholipid binding;	K07951	-
ENSG00000104442	1569.69	1.22254	0.289887	0.0568671	5.09761	3.43967e-07	2.93199e-06	8	65602458	65634217	-	ARMC1	armadillo repeat containing 1 [Source:HGNC Symbol%3BAcc:HGNC:17684]	GO:0048312:intracellular distribution of mitochondria;	GO:0005829:cytosol;GO:0005741:mitochondrial outer membrane;GO:0005739:mitochondrion;	GO:0046872:metal ion binding;	K17306	-
ENSG00000170632	836.096	1.29087	0.368344	0.0694183	5.30615	1.11966e-07	1.02476e-06	7	103074881	103099759	+	ARMC10	armadillo repeat containing 10 [Source:HGNC Symbol%3BAcc:HGNC:21706]	GO:0043066:negative regulation of apoptotic process;GO:1902254:negative regulation of intrinsic apoptotic signaling pathway by p... <Preview truncated at 128 characters>	GO:0005783:endoplasmic reticulum;GO:0005789:endoplasmic reticulum membrane;GO:0016021:integral component of membrane;GO:0005739:... <Preview truncated at 128 characters>	GO:0050692:DBD domain binding;GO:0002039:p53 binding;	K10279;K11447	-;ko05202 Transcriptional misregulation in cancer;
ENSG00000105676	303.505	1.58658	0.665916	0.115652	5.75794	8.51479e-09	9.2387e-08	19	19033575	19060311	+	ARMC6	armadillo repeat containing 6 [Source:HGNC Symbol%3BAcc:HGNC:25049]	GO:0002244:hematopoietic progenitor cell differentiation;	GO:0005829:cytosol;	-	K04264	;ko04020 Calcium signaling pathway;ko04080 Neuroactive ligand-receptor interaction;ko04611 Platelet activation;
ENSG00000143437	1119.92	0.768024	-0.380777	0.0589376	-6.46069	1.04226e-10	1.43233e-09	1	150809713	150876708	-	ARNT	aryl hydrocarbon receptor nuclear translocator [Source:HGNC Symbol%3BAcc:HGNC:700]	GO:0030154:cell differentiation;GO:0001892:embryonic placenta development;GO:0001938:positive regulation of endothelial cell pro... <Preview truncated at 128 characters>	GO:0034751:aryl hydrocarbon receptor complex;GO:0000785:chromatin;GO:0005737:cytoplasm;GO:0016604:nuclear body;GO:0005654:nucleo... <Preview truncated at 128 characters>	GO:0017162:aryl hydrocarbon receptor binding;GO:0000987:core promoter proximal region sequence-specific DNA binding;GO:0003700:s... <Preview truncated at 128 characters>	K09097	;ko04066 HIF-1 signaling pathway;ko04934 Cushing syndrome;ko05200 Pathways in cancer;ko05204 Chemical carcinogenesis;ko05211 Ren... <Preview truncated at 128 characters>
ENSG00000029153	1265.12	1.26293	0.336775	0.056865	5.92237	3.1734e-09	3.64242e-08	12	27332836	27425289	+	ARNTL2	aryl hydrocarbon receptor nuclear translocator like 2 [Source:HGNC Symbol%3BAcc:HGNC:18984]	GO:0007623:circadian rhythm;GO:0009649:entrainment of circadian clock;GO:0042753:positive regulation of circadian rhythm;GO:0045... <Preview truncated at 128 characters>	GO:0034751:aryl hydrocarbon receptor complex;GO:0000785:chromatin;GO:0005737:cytoplasm;GO:0005730:nucleolus;GO:0005654:nucleopla... <Preview truncated at 128 characters>	GO:0003700:sequence-specific DNA binding transcription factor activity;GO:0000981:sequence-specific DNA binding RNA polymerase I... <Preview truncated at 128 characters>	K09099	-
ENSG00000136950	987.923	1.20065	0.263815	0.0763239	3.45651	0.00054721	0.00251235	9	124862130	124877733	+	ARPC5L	actin related protein 2/3 complex subunit 5 like [Source:HGNC Symbol%3BAcc:HGNC:23366]	GO:0034314:Arp2/3 complex-mediated actin nucleation;	GO:0005885:Arp2/3 protein complex;GO:0005737:cytoplasm;	GO:0003779:actin binding;	K05754	;ko04144 Endocytosis;ko04530 Tight junction;ko04666 Fc gamma R-mediated phagocytosis;ko04810 Regulation of actin cytoskeleton;ko... <Preview truncated at 128 characters>
ENSG00000242498	687.774	0.833996	-0.261888	0.0718424	-3.64531	0.000267066	0.001318	15	89895006	89912952	-	ARPIN	actin related protein 2/3 complex inhibitor [Source:HGNC Symbol%3BAcc:HGNC:28782]	GO:0033058:directional locomotion;GO:0051126:negative regulation of actin nucleation;GO:0030336:negative regulation of cell migr... <Preview truncated at 128 characters>	GO:0030027:lamellipodium;	-	K17985;K12870	;ko04137 Mitophagy - animal;ko04140 Autophagy - animal;ko05010 Alzheimer disease;ko05014 Amyotrophic lateral sclerosis;ko05016 H... <Preview truncated at 128 characters>
ENSG00000113369	820.015	0.740765	-0.432912	0.0780766	-5.54471	2.94443e-08	2.96555e-07	5	91368631	91383317	-	ARRDC3	arrestin domain containing 3 [Source:HGNC Symbol%3BAcc:HGNC:29263]	GO:0060613:fat pad development;GO:0071878:negative regulation of adrenergic receptor signaling pathway;GO:0031651:negative regul... <Preview truncated at 128 characters>	GO:0005737:cytoplasm;GO:0005769:early endosome;GO:0005768:endosome;GO:0005764:lysosome;GO:0005886:plasma membrane;	GO:0031699:beta-3 adrenergic receptor binding;	-	-
ENSG00000183876	687.449	0.564497	-0.824961	0.140556	-5.86926	4.37736e-09	4.93433e-08	5	150296343	150339307	-	ARSI	arylsulfatase family member I [Source:HGNC Symbol%3BAcc:HGNC:32521]	-	GO:0005788:endoplasmic reticulum lumen;GO:0005576:extracellular region;	GO:0004065:arylsulfatase activity;GO:0046872:metal ion binding;	K12375	-
ENSG00000180801	371.269	1.23041	0.299134	0.099028	3.0207	0.00252189	0.00978619	4	113900284	113979727	-	ARSJ	arylsulfatase family member J [Source:HGNC Symbol%3BAcc:HGNC:26286]	-	GO:0015629:actin cytoskeleton;GO:0005788:endoplasmic reticulum lumen;GO:0005576:extracellular region;	GO:0004065:arylsulfatase activity;GO:0046872:metal ion binding;	K12375	-
ENSG00000117407	287.648	1.2731	0.348345	0.119105	2.92469	0.00344803	0.0128056	1	43933320	43937240	+	ARTN	artemin [Source:HGNC Symbol%3BAcc:HGNC:727]	GO:0007411:axon guidance;GO:0050930:induction of positive chemotaxis;GO:0097021:lymphocyte migration into lymphoid organs;GO:000... <Preview truncated at 128 characters>	GO:0005576:extracellular region;GO:0005615:extracellular space;	GO:0030116:glial cell line-derived neurotrophic factor receptor binding;GO:0008083:growth factor activity;GO:0030971:receptor ty... <Preview truncated at 128 characters>	-	-
ENSG00000173409	630.51	1.27359	0.348902	0.0768368	4.54082	5.60368e-06	3.8631e-05	1	230978981	231000733	+	ARV1	ARV1 homolog%2C fatty acid homeostasis modulator [Source:HGNC Symbol%3BAcc:HGNC:29561]	GO:0008206:bile acid metabolic process;GO:0006695:cholesterol biosynthetic process;GO:0030301:cholesterol transport;GO:0032366:i... <Preview truncated at 128 characters>	GO:0032541:cortical endoplasmic reticulum;GO:0005789:endoplasmic reticulum membrane;GO:0005794:Golgi apparatus;GO:0016021:integr... <Preview truncated at 128 characters>	GO:0015248:sterol transporter activity;	-	-
ENSG00000099889	163.323	1.46126	0.547215	0.148689	3.68026	0.000233	0.00116564	22	19969896	20016823	-	ARVCF	ARVCF delta catenin family member [Source:HGNC Symbol%3BAcc:HGNC:728]	GO:0016339:calcium-dependent cell-cell adhesion via plasma membrane cell adhesion molecules;GO:0007155:cell adhesion;GO:0098609:... <Preview truncated at 128 characters>	GO:0005912:adherens junction;GO:0005737:cytoplasm;GO:0005622:intracellular;GO:0005634:nucleus;GO:0005886:plasma membrane;	GO:0045296:cadherin binding;	-	-
ENSG00000104763	1614.38	0.793696	-0.333342	0.0560968	-5.94226	2.81122e-09	3.2492e-08	8	18055992	18084998	-	ASAH1	N-acylsphingosine amidohydrolase 1 [Source:HGNC Symbol%3BAcc:HGNC:735]	GO:0071356:cellular response to tumor necrosis factor;GO:0046513:ceramide biosynthetic process;GO:0046514:ceramide catabolic pro... <Preview truncated at 128 characters>	GO:0070062:extracellular exosome;GO:0005576:extracellular region;GO:0005615:extracellular space;GO:0043202:lysosomal lumen;GO:00... <Preview truncated at 128 characters>	GO:0017064:fatty acid amide hydrolase activity;GO:0016810:hydrolase activity, acting on carbon-nitrogen (but not peptide) bonds;... <Preview truncated at 128 characters>	K12348;K02927	;ko00600 Sphingolipid metabolism;ko01100 Metabolic pathways;ko04071 Sphingolipid signaling pathway;ko04142 Lysosome;;ko03010 Rib... <Preview truncated at 128 characters>
ENSG00000153317	1916.65	1.29066	0.368111	0.0552092	6.66757	2.60073e-11	3.82461e-10	8	130052104	130443674	-	ASAP1	ArfGAP with SH3 domain%2C ankyrin repeat and PH domain 1 [Source:HGNC Symbol%3BAcc:HGNC:2720]	GO:0060271:cilium morphogenesis;GO:0061000:negative regulation of dendritic spine development;GO:0043547:positive regulation of ... <Preview truncated at 128 characters>	GO:0031253:cell projection membrane;GO:0005829:cytosol;GO:0043197:dendritic spine;GO:0002102:podosome;GO:0005737:cytoplasm;	GO:0045296:cadherin binding;GO:0005096:GTPase activator activity;GO:0046872:metal ion binding;GO:0005547:phosphatidylinositol-3,... <Preview truncated at 128 characters>	K12488	;ko04144 Endocytosis;ko04666 Fc gamma R-mediated phagocytosis;
ENSG00000088280	313.982	0.470996	-1.08621	0.105516	-10.2943	7.47445e-25	3.40171e-23	1	23428563	23484568	-	ASAP3	ArfGAP with SH3 domain%2C ankyrin repeat and PH domain 3 [Source:HGNC Symbol%3BAcc:HGNC:14987]	GO:0016477:cell migration;GO:0043547:positive regulation of GTPase activity;GO:0051492:regulation of stress fiber assembly;	GO:0005829:cytosol;GO:0005925:focal adhesion;GO:0043231:intracellular membrane-bounded organelle;GO:0005654:nucleoplasm;GO:00017... <Preview truncated at 128 characters>	GO:0005096:GTPase activator activity;GO:0046872:metal ion binding;	K12488	;ko04144 Endocytosis;ko04666 Fc gamma R-mediated phagocytosis;
ENSG00000196372	514.529	1.26501	0.339152	0.0809341	4.19048	2.78369e-05	0.000168667	10	5638867	5666595	-	ASB13	ankyrin repeat and SOCS box containing 13 [Source:HGNC Symbol%3BAcc:HGNC:19765]	GO:0035556:intracellular signal transduction;GO:0016567:protein ubiquitination;	GO:0005829:cytosol;	-	K10335	-
ENSG00000138381	624.024	1.24008	0.310435	0.0768847	4.03767	5.39839e-05	0.000310096	2	189661385	189670831	+	ASNSD1	asparagine synthetase domain containing 1 [Source:HGNC Symbol%3BAcc:HGNC:24910]	GO:0006529:asparagine biosynthetic process;GO:0006541:glutamine metabolic process;	-	GO:0004066:asparagine synthase (glutamine-hydrolyzing) activity;	-	-
ENSG00000198363	5949.14	1.21313	0.278731	0.0403137	6.91406	4.70985e-12	7.56644e-11	8	61500556	61714640	-	ASPH	aspartate beta-hydroxylase [Source:HGNC Symbol%3BAcc:HGNC:757]	GO:0097202:activation of cysteine-type endopeptidase activity;GO:0032237:activation of store-operated calcium channel activity;G... <Preview truncated at 128 characters>	GO:0034704:calcium channel complex;GO:0032541:cortical endoplasmic reticulum;GO:0005783:endoplasmic reticulum;GO:0005789:endopla... <Preview truncated at 128 characters>	GO:0005509:calcium ion binding;GO:0009055:electron carrier activity;GO:0008307:structural constituent of muscle;GO:0005198:struc... <Preview truncated at 128 characters>	K00476	;ko04020 Calcium signaling pathway;ko04260 Cardiac muscle contraction;
ENSG00000130707	1761.39	0.570511	-0.809672	0.051143	-15.8315	1.88585e-56	4.30209e-54	9	130444961	130501274	+	ASS1	argininosuccinate synthase 1 [Source:HGNC Symbol%3BAcc:HGNC:758]	GO:0006526:arginine biosynthetic process;GO:0000053:argininosuccinate metabolic process;GO:0007623:circadian rhythm;GO:0000050:u... <Preview truncated at 128 characters>	GO:0005737:cytoplasm;GO:0005829:cytosol;GO:0070852:cell body fiber;GO:0005783:endoplasmic reticulum;GO:0070062:extracellular exo... <Preview truncated at 128 characters>	GO:0004055:argininosuccinate synthase activity;GO:0005524:ATP binding;GO:0016597:amino acid binding;GO:0042802:identical protein... <Preview truncated at 128 characters>	K01940	;ko00220 Arginine biosynthesis;ko00250 Alanine, aspartate and glutamate metabolism;ko01100 Metabolic pathways;ko01230 Biosynthes... <Preview truncated at 128 characters>
ENSG00000156802	4550.53	1.19726	0.259739	0.0442991	5.8633	4.53765e-09	5.10555e-08	8	123319850	123416350	-	ATAD2	ATPase family AAA domain containing 2 [Source:HGNC Symbol%3BAcc:HGNC:30123]	GO:0006325:chromatin organization;GO:0031936:negative regulation of chromatin silencing;GO:0045944:positive regulation of transc... <Preview truncated at 128 characters>	GO:0070062:extracellular exosome;GO:0005654:nucleoplasm;GO:0005634:nucleus;	GO:0005524:ATP binding;GO:0016887:ATPase activity;GO:0003682:chromatin binding;GO:0042393:histone binding;	K17985;K00088;K06115	-
ENSG00000197785	383.851	1.44956	0.535618	0.100597	5.32442	1.01277e-07	9.35848e-07	1	1512162	1534685	+	ATAD3A	ATPase family AAA domain containing 3A [Source:HGNC Symbol%3BAcc:HGNC:25567]	GO:0007005:mitochondrion organization;GO:0043066:negative regulation of apoptotic process;GO:0001558:regulation of cell growth;	GO:0005743:mitochondrial inner membrane;GO:0005739:mitochondrion;GO:0005886:plasma membrane;GO:0030667:secretory granule membran... <Preview truncated at 128 characters>	GO:0005524:ATP binding;GO:0008270:zinc ion binding;GO:0042802:identical protein binding;	K17681	-
ENSG00000160072	275.996	1.52259	0.606524	0.129609	4.67966	2.87351e-06	2.07854e-05	1	1471765	1497848	+	ATAD3B	ATPase family AAA domain containing 3B [Source:HGNC Symbol%3BAcc:HGNC:24007]	GO:0007005:mitochondrion organization;	GO:0005743:mitochondrial inner membrane;GO:0005739:mitochondrion;GO:0005886:plasma membrane;GO:0030667:secretory granule membran... <Preview truncated at 128 characters>	GO:0005524:ATP binding;GO:0008270:zinc ion binding;	K17681	-
ENSG00000128272	4467.47	1.4048	0.490368	0.0416766	11.766	5.84178e-32	3.99298e-30	22	39519695	39522683	+	ATF4	activating transcription factor 4 [Source:HGNC Symbol%3BAcc:HGNC:786]	GO:0030282:bone mineralization;GO:0034198:cellular response to amino acid starvation;GO:1903351:cellular response to dopamine;GO... <Preview truncated at 128 characters>	GO:1990590:ATF1-ATF4 transcription factor complex;GO:1990589:ATF4-CREB1 transcription factor complex;GO:1990617:CHOP-ATF4 comple... <Preview truncated at 128 characters>	GO:0008140:cAMP response element binding protein binding;GO:0003677:DNA binding;GO:0001228:RNA polymerase II transcription regul... <Preview truncated at 128 characters>	K04374	;ko04010 MAPK signaling pathway;ko04022 cGMP-PKG signaling pathway;ko04137 Mitophagy - animal;ko04141 Protein processing in endo... <Preview truncated at 128 characters>
ENSG00000213676	1509.53	0.774515	-0.368635	0.0605039	-6.09276	1.10983e-09	1.34297e-08	6	32115264	32128253	-	ATF6B	activating transcription factor 6 beta [Source:HGNC Symbol%3BAcc:HGNC:2349]	GO:0036500:ATF6-mediated unfolded protein response;GO:0030968:endoplasmic reticulum unfolded protein response;GO:1903892:negativ... <Preview truncated at 128 characters>	GO:0000785:chromatin;GO:0005789:endoplasmic reticulum membrane;GO:0005794:Golgi apparatus;GO:0030176:integral component of endop... <Preview truncated at 128 characters>	GO:0035497:cAMP response element binding;GO:0003700:sequence-specific DNA binding transcription factor activity;GO:0000981:seque... <Preview truncated at 128 characters>	K09049	;ko04022 cGMP-PKG signaling pathway;ko04141 Protein processing in endoplasmic reticulum;ko04151 PI3K-Akt signaling pathway;ko042... <Preview truncated at 128 characters>
ENSG00000170653	570.632	0.830849	-0.267341	0.0784576	-3.40746	0.000655695	0.00295322	12	53507856	53626410	-	ATF7	activating transcription factor 7 [Source:HGNC Symbol%3BAcc:HGNC:792]	GO:0000122:negative regulation of transcription from RNA polymerase II promoter;GO:0045944:positive regulation of transcription ... <Preview truncated at 128 characters>	GO:0000785:chromatin;GO:0000781:chromosome, telomeric region;GO:0005737:cytoplasm;GO:0005654:nucleoplasm;GO:0005634:nucleus;	GO:0035497:cAMP response element binding;GO:0003700:sequence-specific DNA binding transcription factor activity;GO:0000981:seque... <Preview truncated at 128 characters>	K09045	-
ENSG00000126775	643.756	0.716906	-0.480143	0.0821095	-5.8476	4.98719e-09	5.5804e-08	14	55366391	55411830	-	ATG14	autophagy related 14 [Source:HGNC Symbol%3BAcc:HGNC:19962]	GO:0000045:autophagosome assembly;GO:0016240:autophagosome docking;GO:0042149:cellular response to glucose starvation;GO:0009267... <Preview truncated at 128 characters>	GO:0005776:autophagosome;GO:0000421:autophagosome membrane;GO:0005930:axoneme;GO:0005829:cytosol;GO:0005789:endoplasmic reticulu... <Preview truncated at 128 characters>	GO:0051020:GTPase binding;	K17889	;ko04140 Autophagy - animal;ko05010 Alzheimer disease;ko05014 Amyotrophic lateral sclerosis;ko05016 Huntington disease;ko05017 S... <Preview truncated at 128 characters>
ENSG00000085978	652.826	1.63211	0.706734	0.085568	8.25932	1.46499e-16	3.67253e-15	2	233210051	233295674	+	ATG16L1	autophagy related 16 like 1 [Source:HGNC Symbol%3BAcc:HGNC:21498]	GO:0000045:autophagosome assembly;GO:0016236:macroautophagy;GO:0039689:negative stranded viral RNA replication;GO:0010508:positi... <Preview truncated at 128 characters>	GO:0005776:autophagosome;GO:0000421:autophagosome membrane;GO:0005930:axoneme;GO:0005829:cytosol;GO:0034045:pre-autophagosomal s... <Preview truncated at 128 characters>	GO:0051020:GTPase binding;GO:0042802:identical protein binding;GO:0019787:ubiquitin-like protein transferase activity;	K17890	;ko04136 Autophagy - other;ko04140 Autophagy - animal;ko04621 NOD-like receptor signaling pathway;ko05131 Shigellosis;
ENSG00000138363	2520.01	1.49697	0.582049	0.0469465	12.3982	2.67421e-35	2.23873e-33	2	215311956	215349773	+	ATIC	5-aminoimidazole-4-carboxamide ribonucleotide formyltransferase/IMP cyclohydrolase [Source:HGNC Symbol%3BAcc:HGNC:794]	GO:0006189:de novo IMP biosynthetic process;GO:0031100:organ regeneration;GO:0003360:brainstem development;GO:0098761:cellular... <Preview truncated at 128 characters>	GO:0005829:cytosol;GO:0070062:extracellular exosome;GO:0016020:membrane;GO:0005886:plasma membrane;	GO:0045296:cadherin binding;GO:0003937:IMP cyclohydrolase activity;GO:0004643:phosphoribosylaminoimidazolecarboxamide formyltran... <Preview truncated at 128 characters>	K00602	;ko00230 Purine metabolism;ko00670 One carbon pool by folate;ko01100 Metabolic pathways;ko01523 Antifolate resistance;
ENSG00000119787	3377.64	1.19656	0.258896	0.0459142	5.6387	1.71338e-08	1.77666e-07	2	38293954	38377285	-	ATL2	atlastin GTPase 2 [Source:HGNC Symbol%3BAcc:HGNC:24047]	GO:0007029:endoplasmic reticulum organization;GO:0007030:Golgi organization;GO:0051260:protein homooligomerization;	GO:0005783:endoplasmic reticulum;GO:0016021:integral component of membrane;GO:0016020:membrane;	GO:0005525:GTP binding;GO:0003924:GTPase activity;GO:0042802:identical protein binding;	K17339	-
ENSG00000101974	1406.41	1.46108	0.547034	0.0602723	9.07603	1.12607e-19	3.72123e-18	X	139726346	139945276	-	ATP11C	ATPase phospholipid transporting 11C [Source:HGNC Symbol%3BAcc:HGNC:13554]	GO:0034220:ion transmembrane transport;GO:0045332:phospholipid translocation;	GO:0031901:early endosome membrane;GO:0005783:endoplasmic reticulum;GO:0005789:endoplasmic reticulum membrane;GO:0005887:integra... <Preview truncated at 128 characters>	GO:0005524:ATP binding;GO:0000287:magnesium ion binding;GO:0090555:phosphatidylethanolamine-translocating ATPase activity;	K01530	-
ENSG00000105726	218.14	1.3823	0.467067	0.135476	3.4476	0.000565585	0.00258808	19	19645198	19663676	-	ATP13A1	ATPase 13A1 [Source:HGNC Symbol%3BAcc:HGNC:24215]	GO:0006874:cellular calcium ion homeostasis;GO:0034220:ion transmembrane transport;GO:0015031:protein transport;	GO:0005789:endoplasmic reticulum membrane;GO:0016021:integral component of membrane;GO:0016020:membrane;	GO:0015410:manganese-transporting ATPase activity;GO:0005524:ATP binding;GO:0046872:metal ion binding;GO:0019829:cation-transpor... <Preview truncated at 128 characters>	K14950	-
ENSG00000133657	4883.74	1.27847	0.354421	0.0434456	8.15782	3.4113e-16	8.30082e-15	3	194402672	194498364	-	ATP13A3	ATPase 13A3 [Source:HGNC Symbol%3BAcc:HGNC:24113]	GO:0006874:cellular calcium ion homeostasis;	GO:0031901:early endosome membrane;GO:0016021:integral component of membrane;GO:0031902:late endosome membrane;GO:0016020:membra... <Preview truncated at 128 characters>	GO:0015594:putrescine-importing ATPase activity;GO:0005524:ATP binding;GO:0019829:cation-transporting ATPase activity;GO:0046872... <Preview truncated at 128 characters>	K14951	-
ENSG00000203865	116.957	0.657529	-0.604873	0.18207	-3.3222	0.000893103	0.00390492	1	116378437	116421301	-	ATP1A1-AS1	ATP1A1 antisense RNA 1 [Source:HGNC Symbol%3BAcc:HGNC:28262]	-	-	-	-	-
ENSG00000069849	9121.59	0.642422	-0.638406	0.0477531	-13.3689	9.18911e-41	9.86478e-39	3	141876124	141926549	+	ATP1B3	ATPase Na+/K+ transporting subunit beta 3 [Source:HGNC Symbol%3BAcc:HGNC:806]	GO:0030007:cellular potassium ion homeostasis;GO:0006883:cellular sodium ion homeostasis;GO:0086009:membrane repolarization;GO:0... <Preview truncated at 128 characters>	GO:0016324:apical plasma membrane;GO:0016323:basolateral plasma membrane;GO:0005901:caveola;GO:0070062:extracellular exosome;GO:... <Preview truncated at 128 characters>	GO:0001671:ATPase activator activity;GO:0051117:ATPase binding;GO:0005391:sodium:potassium-exchanging ATPase activity;GO:0030674... <Preview truncated at 128 characters>	K01540	;ko04022 cGMP-PKG signaling pathway;ko04024 cAMP signaling pathway;ko04260 Cardiac muscle contraction;ko04261 Adrenergic signali... <Preview truncated at 128 characters>
ENSG00000166896	154.547	1.36592	0.449873	0.150291	2.99334	0.00275938	0.0105818	12	57906039	57959148	+	ATP23	ATP23 metallopeptidase and ATP synthase assembly factor homolog [Source:HGNC Symbol%3BAcc:HGNC:29452]	GO:0006303:double-strand break repair via nonhomologous end joining;GO:0034982:mitochondrial protein processing;GO:0033615:mitoc... <Preview truncated at 128 characters>	GO:0030054:cell junction;GO:0005829:cytosol;GO:0005958:DNA-dependent protein kinase-DNA ligase 4 complex;GO:0031314:extrinsic co... <Preview truncated at 128 characters>	GO:0004677:DNA-dependent protein kinase activity;GO:0046872:metal ion binding;GO:0004222:metalloendopeptidase activity;	K18156	-
ENSG00000070961	1189.22	1.33601	0.417926	0.0624373	6.69353	2.17857e-11	3.2377e-10	12	89588049	89709300	-	ATP2B1	ATPase plasma membrane Ca2+ transporting 1 [Source:HGNC Symbol%3BAcc:HGNC:814]	GO:0007568:aging;GO:0007420:brain development;GO:1990034:calcium ion export from cell;GO:0006874:cellular calcium ion homeostasi... <Preview truncated at 128 characters>	GO:0016324:apical plasma membrane;GO:0016323:basolateral plasma membrane;GO:0009898:cytoplasmic side of plasma membrane;GO:00325... <Preview truncated at 128 characters>	GO:0005524:ATP binding;GO:0019829:cation-transporting ATPase activity;GO:0015085:calcium ion transmembrane transporter activity;... <Preview truncated at 128 characters>	K05850	;ko04020 Calcium signaling pathway;ko04022 cGMP-PKG signaling pathway;ko04024 cAMP signaling pathway;ko04261 Adrenergic signalin... <Preview truncated at 128 characters>
ENSG00000058668	2580.36	0.657031	-0.605966	0.0476961	-12.7047	5.56574e-37	5.02845e-35	1	203626787	203744081	+	ATP2B4	ATPase plasma membrane Ca2+ transporting 4 [Source:HGNC Symbol%3BAcc:HGNC:817]	GO:1901660:calcium ion export;GO:0098703:calcium ion import across plasma membrane;GO:0097553:calcium ion transmembrane import i... <Preview truncated at 128 characters>	GO:0016323:basolateral plasma membrane;GO:0005901:caveola;GO:0005887:integral component of plasma membrane;	GO:0005524:ATP binding;GO:0019829:cation-transporting ATPase activity;GO:0015085:calcium ion transmembrane transporter activity;... <Preview truncated at 128 characters>	K05850	;ko04020 Calcium signaling pathway;ko04022 cGMP-PKG signaling pathway;ko04024 cAMP signaling pathway;ko04261 Adrenergic signalin... <Preview truncated at 128 characters>
ENSG00000159199	639.187	1.27841	0.354356	0.0821082	4.31572	1.59082e-05	0.000101123	17	48892765	48895871	+	ATP5MC1	ATP synthase membrane subunit c locus 1 [Source:HGNC Symbol%3BAcc:HGNC:841]	GO:0015986:ATP synthesis coupled proton transport;	GO:0016021:integral component of membrane;GO:0005743:mitochondrial inner membrane;GO:0005753:mitochondrial proton-transporting A... <Preview truncated at 128 characters>	GO:0008289:lipid binding;GO:0015078:hydrogen ion transmembrane transporter activity;	K02128	;ko00190 Oxidative phosphorylation;ko01100 Metabolic pathways;ko04714 Thermogenesis;ko05010 Alzheimer disease;ko05012 Parkinson ... <Preview truncated at 128 characters>
ENSG00000033627	1248.6	0.835188	-0.259826	0.0613961	-4.23197	2.31657e-05	0.000142157	17	42458844	42522582	+	ATP6V0A1	ATPase H+ transporting V0 subunit a1 [Source:HGNC Symbol%3BAcc:HGNC:865]	GO:0016241:regulation of macroautophagy;GO:1901998:toxin transport;GO:0007035:vacuolar acidification;	GO:0005829:cytosol;GO:0010008:endosome membrane;GO:0070062:extracellular exosome;GO:0005794:Golgi apparatus;GO:0016021:integral ... <Preview truncated at 128 characters>	GO:0051117:ATPase binding;GO:0046961:proton-transporting ATPase activity, rotational mechanism;GO:0015078:hydrogen ion transmemb... <Preview truncated at 128 characters>	K02154	;ko00190 Oxidative phosphorylation;ko01100 Metabolic pathways;ko04142 Lysosome;ko04145 Phagosome;ko04721 Synaptic vesicle cycle;... <Preview truncated at 128 characters>
ENSG00000117410	456.454	1.26703	0.341451	0.0880875	3.87627	0.000106069	0.000571866	1	43974487	43978295	+	ATP6V0B	ATPase H+ transporting V0 subunit b [Source:HGNC Symbol%3BAcc:HGNC:861]	GO:1902600:hydrogen ion transmembrane transport;GO:0016241:regulation of macroautophagy;	GO:0005768:endosome;GO:0016021:integral component of membrane;GO:0033179:proton-transporting V-type ATPase, V0 domain;GO:0005774... <Preview truncated at 128 characters>	GO:0046961:proton-transporting ATPase activity, rotational mechanism;GO:0005215:transporter activity;GO:0008553:hydrogen-exporti... <Preview truncated at 128 characters>	K03661	;ko00190 Oxidative phosphorylation;ko01100 Metabolic pathways;ko04142 Lysosome;ko04145 Phagosome;ko04721 Synaptic vesicle cycle;... <Preview truncated at 128 characters>
ENSG00000185883	146.201	1.33072	0.412204	0.157982	2.60917	0.0090761	0.0296751	16	2513952	2520218	+	ATP6V0C	ATPase H+ transporting V0 subunit c [Source:HGNC Symbol%3BAcc:HGNC:855]	GO:0030177:positive regulation of Wnt signaling pathway;GO:1902600:hydrogen ion transmembrane transport;GO:0016241:regulation of... <Preview truncated at 128 characters>	GO:0035577:azurophil granule membrane;GO:0010008:endosome membrane;GO:0070062:extracellular exosome;GO:0005925:focal adhesion;GO... <Preview truncated at 128 characters>	GO:0046933:proton-transporting ATP synthase activity, rotational mechanism;GO:0046961:proton-transporting ATPase activity, rotat... <Preview truncated at 128 characters>	K02155	;ko00190 Oxidative phosphorylation;ko01100 Metabolic pathways;ko04142 Lysosome;ko04145 Phagosome;ko04721 Synaptic vesicle cycle;... <Preview truncated at 128 characters>
ENSG00000250565	117.272	1.3946	0.479853	0.166732	2.87799	0.00400214	0.0146049	2	46490750	46542577	-	ATP6V1E2	ATPase H+ transporting V1 subunit E2 [Source:HGNC Symbol%3BAcc:HGNC:18125]	GO:0016241:regulation of macroautophagy;	GO:0001669:acrosomal vesicle;GO:0005829:cytosol;GO:0033178:proton-transporting two-sector ATPase complex, catalytic domain;	GO:0008553:hydrogen-exporting ATPase activity, phosphorylative mechanism;GO:0046961:proton-transporting ATPase activity, rotatio... <Preview truncated at 128 characters>	K02150	;ko00190 Oxidative phosphorylation;ko01100 Metabolic pathways;ko04145 Phagosome;ko04150 mTOR signaling pathway;ko04721 Synaptic ... <Preview truncated at 128 characters>
ENSG00000124406	234.962	0.63813	-0.648078	0.12803	-5.06192	4.15056e-07	3.47626e-06	4	42408373	42657121	-	ATP8A1	ATPase phospholipid transporting 8A1 [Source:HGNC Symbol%3BAcc:HGNC:13531]	GO:0045332:phospholipid translocation;GO:0034220:ion transmembrane transport;GO:0007612:learning;GO:0030335:positive regulation ... <Preview truncated at 128 characters>	GO:0042584:chromaffin granule membrane;GO:0031410:cytoplasmic vesicle;GO:0005783:endoplasmic reticulum;GO:0016021:integral compo... <Preview truncated at 128 characters>	GO:0005524:ATP binding;GO:0000287:magnesium ion binding;GO:0019829:cation-transporting ATPase activity;	K14802	-
ENSG00000132932	335.884	2.52713	1.3375	0.108818	12.2912	1.01011e-34	8.12093e-33	13	25371974	26025851	+	ATP8A2	ATPase phospholipid transporting 8A2 [Source:HGNC Symbol%3BAcc:HGNC:13533]	GO:0007568:aging;GO:0007409:axonogenesis;GO:0050908:detection of light stimulus involved in visual perception;GO:0042755:eating ... <Preview truncated at 128 characters>	GO:0005768:endosome;GO:0005794:Golgi apparatus;GO:0016021:integral component of membrane;GO:0005654:nucleoplasm;GO:0001917:photo... <Preview truncated at 128 characters>	GO:0005524:ATP binding;GO:0000287:magnesium ion binding;GO:0090555:phosphatidylethanolamine-translocating ATPase activity;	K14802	-
ENSG00000081923	2420.3	0.760235	-0.395482	0.0493056	-8.02104	1.04851e-15	2.45956e-14	18	57646426	57803315	-	ATP8B1	ATPase phospholipid transporting 8B1 [Source:HGNC Symbol%3BAcc:HGNC:3706]	GO:0045176:apical protein localization;GO:0015721:bile acid and bile salt transport;GO:0008206:bile acid metabolic process;GO:00... <Preview truncated at 128 characters>	GO:0016324:apical plasma membrane;GO:0031526:brush border membrane;GO:0005829:cytosol;GO:0005783:endoplasmic reticulum;GO:000579... <Preview truncated at 128 characters>	GO:0005524:ATP binding;GO:1901612:cardiolipin binding;GO:0000287:magnesium ion binding;	K17985;K01530	-
ENSG00000054793	668.504	0.634916	-0.655363	0.0732791	-8.94338	3.7744e-19	1.19175e-17	20	51596514	51768390	-	ATP9A	ATPase phospholipid transporting 9A (putative) [Source:HGNC Symbol%3BAcc:HGNC:13540]	GO:0006897:endocytosis;GO:1903542:negative regulation of exosomal secretion;GO:0045332:phospholipid translocation;GO:2001135:reg... <Preview truncated at 128 characters>	GO:0005769:early endosome;GO:0031901:early endosome membrane;GO:0005768:endosome;GO:0016021:integral component of membrane;GO:00... <Preview truncated at 128 characters>	GO:0005524:ATP binding;GO:0000287:magnesium ion binding;GO:0002020:protease binding;	K01530	-
ENSG00000166377	272.419	0.812342	-0.29984	0.120296	-2.49253	0.0126838	0.0395963	18	79069285	79378287	+	ATP9B	ATPase phospholipid transporting 9B (putative) [Source:HGNC Symbol%3BAcc:HGNC:13541]	GO:0006897:endocytosis;GO:0045332:phospholipid translocation;GO:0006890:retrograde vesicle-mediated transport, Golgi to ER;GO:00... <Preview truncated at 128 characters>	GO:0005768:endosome;GO:0016021:integral component of membrane;GO:0048471:perinuclear region of cytoplasm;GO:0005886:plasma membr... <Preview truncated at 128 characters>	GO:0005524:ATP binding;GO:0000287:magnesium ion binding;GO:0046872:metal ion binding;GO:0003964:RNA-directed DNA polymerase acti... <Preview truncated at 128 characters>	K01530	-
ENSG00000175054	1905.2	1.30442	0.383407	0.0584938	6.55466	5.57691e-11	7.88982e-10	3	142449007	142578733	-	ATR	ATR serine/threonine kinase [Source:HGNC Symbol%3BAcc:HGNC:882]	GO:0006974:cellular response to DNA damage stimulus;GO:0071480:cellular response to gamma radiation;GO:0034644:cellular response... <Preview truncated at 128 characters>	GO:0005694:chromosome;GO:0005794:Golgi apparatus;GO:0005654:nucleoplasm;GO:0005634:nucleus;GO:0016605:PML body;GO:0001741:XY bod... <Preview truncated at 128 characters>	GO:0005524:ATP binding;GO:0003677:DNA binding;GO:0032405:MutLalpha complex binding;GO:0032407:MutSalpha complex binding;GO:00046... <Preview truncated at 128 characters>	K06640	;ko03460 Fanconi anemia pathway;ko04110 Cell cycle;ko04115 p53 signaling pathway;ko04214 Apoptosis - fly;ko04218 Cellular senesc... <Preview truncated at 128 characters>
ENSG00000124788	733.793	0.834734	-0.260612	0.0700335	-3.72125	0.000198239	0.00100861	6	16299112	16761491	-	ATXN1	ataxin 1 [Source:HGNC Symbol%3BAcc:HGNC:10548]	GO:0048856:anatomical structure development;GO:0007420:brain development;GO:0007612:learning;GO:0007613:memory;GO:0000122:negati... <Preview truncated at 128 characters>	GO:0005737:cytoplasm;GO:0005829:cytosol;GO:0042405:nuclear inclusion body;GO:0016363:nuclear matrix;GO:0005730:nucleolus;GO:0005... <Preview truncated at 128 characters>	GO:0003677:DNA binding;GO:0042802:identical protein binding;GO:0034046:poly(G) binding;GO:0008266:poly(U) RNA binding;GO:0008022... <Preview truncated at 128 characters>	K04613;K12581;K08857	-
ENSG00000130638	2280.07	0.829477	-0.269726	0.0469755	-5.74185	9.36487e-09	1.0107e-07	22	45671798	45845307	+	ATXN10	ataxin 10 [Source:HGNC Symbol%3BAcc:HGNC:10549]	GO:0060271:cilium morphogenesis;GO:0007399:nervous system development;GO:0031175:neuron projection development;	GO:0005737:cytoplasm;GO:0005829:cytosol;GO:0030425:dendrite;GO:0005615:extracellular space;GO:0016020:membrane;GO:0043025:neuron... <Preview truncated at 128 characters>	GO:0019899:enzyme binding;GO:0042802:identical protein binding;	K19323	;ko05017 Spinocerebellar ataxia;
ENSG00000127423	400.263	1.30754	0.386857	0.094649	4.08728	4.36456e-05	0.000254972	1	25831913	25859458	-	AUNIP	aurora kinase A and ninein interacting protein [Source:HGNC Symbol%3BAcc:HGNC:28363]	GO:0000724:double-strand break repair via homologous recombination;GO:2001033:negative regulation of double-strand break repair ... <Preview truncated at 128 characters>	GO:0005813:centrosome;GO:0005737:cytoplasm;GO:0005634:nucleus;GO:0000922:spindle pole;	GO:0003684:damaged DNA binding;	K16800	-
ENSG00000115307	943.577	1.19131	0.252547	0.0655396	3.85335	0.000116511	0.000622823	2	74526645	74529760	-	AUP1	AUP1 lipid droplet regulating VLDL assembly factor [Source:HGNC Symbol%3BAcc:HGNC:891]	GO:0071712:ER-associated misfolded protein catabolic process;GO:0034389:lipid particle organization;GO:1990044:protein localizat... <Preview truncated at 128 characters>	GO:0005776:autophagosome;GO:0031410:cytoplasmic vesicle;GO:0005783:endoplasmic reticulum;GO:0070062:extracellular exosome;GO:000... <Preview truncated at 128 characters>	GO:0043130:ubiquitin binding;GO:0031624:ubiquitin conjugating enzyme binding;GO:0031625:ubiquitin protein ligase binding;GO:0097... <Preview truncated at 128 characters>	K19716	-
ENSG00000087586	2966.59	1.22898	0.297457	0.0429191	6.93064	4.18937e-12	6.76602e-11	20	56369389	56392337	-	AURKA	aurora kinase A [Source:HGNC Symbol%3BAcc:HGNC:11393]	GO:0009948:anterior/posterior axis specification;GO:0051301:cell division;GO:0051642:centrosome localization;GO:0000086:G2/M tra... <Preview truncated at 128 characters>	GO:0043203:axon hillock;GO:0005814:centriole;GO:0005813:centrosome;GO:0032133:chromosome passenger complex;GO:0005929:cilium;GO:... <Preview truncated at 128 characters>	GO:0005524:ATP binding;GO:0035174:histone serine kinase activity;GO:0046982:protein heterodimerization activity;GO:0004672:prote... <Preview truncated at 128 characters>	K11481	;ko04114 Oocyte meiosis;ko04914 Progesterone-mediated oocyte maturation;
ENSG00000169857	168.317	1.663	0.733791	0.150811	4.86564	1.14087e-06	8.82612e-06	15	33858782	34075155	-	AVEN	apoptosis and caspase activation inhibitor [Source:HGNC Symbol%3BAcc:HGNC:13509]	GO:0006915:apoptotic process;GO:0043066:negative regulation of apoptotic process;GO:0010972:negative regulation of G2/M transiti... <Preview truncated at 128 characters>	GO:0005829:cytosol;GO:0012505:endomembrane system;GO:0016020:membrane;	-	K04133	;ko04020 Calcium signaling pathway;ko04080 Neuroactive ligand-receptor interaction;ko04725 Cholinergic synapse;ko04810 Regulatio... <Preview truncated at 128 characters>
ENSG00000167601	491.544	2.02999	1.02147	0.103665	9.85357	6.61495e-23	2.68871e-21	19	41219223	41261766	+	AXL	AXL receptor tyrosine kinase [Source:HGNC Symbol%3BAcc:HGNC:905]	GO:0031100:organ regeneration;GO:0001974:blood vessel remodeling;GO:0048469:cell maturation;GO:0016477:cell migration;GO:0031668... <Preview truncated at 128 characters>	GO:0015629:actin cytoskeleton;GO:0009986:cell surface;GO:0070062:extracellular exosome;GO:0005615:extracellular space;GO:0044228... <Preview truncated at 128 characters>	GO:0005524:ATP binding;GO:0032036:myosin heavy chain binding;GO:0043548:phosphatidylinositol 3-kinase binding;GO:0001786:phospha... <Preview truncated at 128 characters>	K05115	;ko01521 EGFR tyrosine kinase inhibitor resistance;
ENSG00000166710	13963.4	0.78121	-0.356218	0.0424146	-8.39848	4.52295e-17	1.1792e-15	15	44711358	44718851	+	B2M	beta-2-microglobulin [Source:HGNC Symbol%3BAcc:HGNC:914]	GO:0002474:antigen processing and presentation of peptide antigen via MHC class I;GO:0006955:immune response;	GO:0005576:extracellular region;GO:0042612:MHC class I protein complex;	-	K08055	;ko04612 Antigen processing and presentation;ko05163 Human cytomegalovirus infection;ko05166 Human T-cell leukemia virus 1 infec... <Preview truncated at 128 characters>
ENSG00000162885	769.645	1.21727	0.283652	0.0774036	3.66459	0.000247738	0.00123194	1	235447190	235504452	-	B3GALNT2	beta-1%2C3-N-acetylgalactosaminyltransferase 2 [Source:HGNC Symbol%3BAcc:HGNC:28596]	GO:0006486:protein glycosylation;GO:0006493:protein O-linked glycosylation;	GO:0005783:endoplasmic reticulum;GO:0005789:endoplasmic reticulum membrane;GO:0000139:Golgi membrane;GO:0016021:integral compone... <Preview truncated at 128 characters>	GO:0008376:acetylgalactosaminyltransferase activity;	K09654	;ko00515 Mannose type O-glycan biosynthesis;ko01100 Metabolic pathways;
ENSG00000176022	285.945	1.4062	0.491807	0.11327	4.3419	1.41253e-05	9.06744e-05	1	1232237	1235041	+	B3GALT6	beta-1%2C3-galactosyltransferase 6 [Source:HGNC Symbol%3BAcc:HGNC:17978]	GO:0030206:chondroitin sulfate biosynthetic process;GO:0006024:glycosaminoglycan biosynthetic process;GO:0030203:glycosaminoglyc... <Preview truncated at 128 characters>	GO:0005794:Golgi apparatus;GO:0032580:Golgi cisterna membrane;GO:0005797:Golgi medial cisterna;GO:0000139:Golgi membrane;GO:0016... <Preview truncated at 128 characters>	GO:0047220:galactosylxylosylprotein 3-beta-galactosyltransferase activity;GO:0008499:UDP-galactose:beta-N-acetylglucosamine beta... <Preview truncated at 128 characters>	K00734	;ko00532 Glycosaminoglycan biosynthesis - chondroitin sulfate / dermatan sulfate;ko00534 Glycosaminoglycan biosynthesis - hepara... <Preview truncated at 128 characters>
ENSG00000170340	425.886	1.21377	0.279499	0.0893253	3.129	0.00175404	0.00711155	2	62196115	62224731	+	B3GNT2	UDP-GlcNAc:betaGal beta-1%2C3-N-acetylglucosaminyltransferase 2 [Source:HGNC Symbol%3BAcc:HGNC:15629]	GO:0007411:axon guidance;GO:0018146:keratan sulfate biosynthetic process;GO:0016266:O-glycan processing;GO:0030311:poly-N-acetyl... <Preview truncated at 128 characters>	GO:0005794:Golgi apparatus;GO:0000139:Golgi membrane;GO:0016021:integral component of membrane;	GO:0008376:acetylgalactosaminyltransferase activity;GO:0008375:acetylglucosaminyltransferase activity;GO:0008457:beta-galactosyl... <Preview truncated at 128 characters>	K00741	;ko00533 Glycosaminoglycan biosynthesis - keratan sulfate;ko00601 Glycosphingolipid biosynthesis - lacto and neolacto series;ko0... <Preview truncated at 128 characters>
ENSG00000179913	173.417	1.45427	0.540292	0.134852	4.00654	6.16143e-05	0.000349537	19	17794828	17813576	+	B3GNT3	UDP-GlcNAc:betaGal beta-1%2C3-N-acetylglucosaminyltransferase 3 [Source:HGNC Symbol%3BAcc:HGNC:13528]	GO:0018146:keratan sulfate biosynthetic process;GO:0016266:O-glycan processing;GO:0030311:poly-N-acetyllactosamine biosynthetic ... <Preview truncated at 128 characters>	GO:0005794:Golgi apparatus;GO:0000139:Golgi membrane;GO:0005887:integral component of plasma membrane;	GO:0008376:acetylgalactosaminyltransferase activity;GO:0008375:acetylglucosaminyltransferase activity;GO:0047223:beta-1,3-galact... <Preview truncated at 128 characters>	K07970	;ko00601 Glycosphingolipid biosynthesis - lacto and neolacto series;ko01100 Metabolic pathways;
ENSG00000139044	111.108	0.742848	-0.428861	0.167118	-2.56622	0.0102815	0.0330463	12	459939	563509	+	B4GALNT3	beta-1%2C4-N-acetyl-galactosaminyltransferase 3 [Source:HGNC Symbol%3BAcc:HGNC:24137]	-	GO:0005794:Golgi apparatus;GO:0032580:Golgi cisterna membrane;GO:0016021:integral component of membrane;GO:0043231:intracellular... <Preview truncated at 128 characters>	GO:0008376:acetylgalactosaminyltransferase activity;GO:0033842:N-acetyl-beta-glucosaminyl-glycoprotein 4-beta-N-acetylgalactosam... <Preview truncated at 128 characters>	K09656	;ko00513 Various types of N-glycan biosynthesis;ko01100 Metabolic pathways;
ENSG00000086062	1609.41	0.817289	-0.291081	0.0516735	-5.63308	1.77022e-08	1.8304e-07	9	33104082	33167356	-	B4GALT1	beta-1%2C4-galactosyltransferase 1 [Source:HGNC Symbol%3BAcc:HGNC:924]	GO:0002526:acute inflammatory response;GO:0060055:angiogenesis involved in wound healing;GO:0007339:binding of sperm to zona pel... <Preview truncated at 128 characters>	GO:0035577:azurophil granule membrane;GO:0016323:basolateral plasma membrane;GO:0031526:brush border membrane;GO:0030057:desmoso... <Preview truncated at 128 characters>	GO:0043014:alpha-tubulin binding;GO:0003831:beta-N-acetylglucosaminylglycopeptide beta-1,4-galactosyltransferase activity;GO:004... <Preview truncated at 128 characters>	K07966	;ko00052 Galactose metabolism;ko00510 N-Glycan biosynthesis;ko00513 Various types of N-glycan biosynthesis;ko00514 Other types o... <Preview truncated at 128 characters>
ENSG00000117411	454.153	1.45623	0.542235	0.090247	6.00834	1.87427e-09	2.20112e-08	1	43978943	43991170	+	B4GALT2	beta-1%2C4-galactosyltransferase 2 [Source:HGNC Symbol%3BAcc:HGNC:925]	GO:0005975:carbohydrate metabolic process;GO:0021680:cerebellar Purkinje cell layer development;GO:0070085:glycosylation;GO:0007... <Preview truncated at 128 characters>	GO:0005794:Golgi apparatus;GO:0032580:Golgi cisterna membrane;GO:0000139:Golgi membrane;GO:0016021:integral component of membran... <Preview truncated at 128 characters>	GO:0003831:beta-N-acetylglucosaminylglycopeptide beta-1,4-galactosyltransferase activity;GO:0008378:galactosyltransferase activi... <Preview truncated at 128 characters>	K07967	;ko00052 Galactose metabolism;ko00510 N-Glycan biosynthesis;ko00513 Various types of N-glycan biosynthesis;ko00514 Other types o... <Preview truncated at 128 characters>
ENSG00000158850	456.469	1.30457	0.383572	0.0942483	4.0698	4.70531e-05	0.000273216	1	161171310	161177968	-	B4GALT3	beta-1%2C4-galactosyltransferase 3 [Source:HGNC Symbol%3BAcc:HGNC:926]	GO:0005975:carbohydrate metabolic process;GO:0006682:galactosylceramide biosynthetic process;GO:0070085:glycosylation;GO:0006486... <Preview truncated at 128 characters>	GO:0005829:cytosol;GO:0070062:extracellular exosome;GO:0005794:Golgi apparatus;GO:0032580:Golgi cisterna membrane;GO:0000139:Gol... <Preview truncated at 128 characters>	GO:0003831:beta-N-acetylglucosaminylglycopeptide beta-1,4-galactosyltransferase activity;GO:0008378:galactosyltransferase activi... <Preview truncated at 128 characters>	K07968;K00231	;ko00510 N-Glycan biosynthesis;ko00513 Various types of N-glycan biosynthesis;ko00514 Other types of O-glycan biosynthesis;ko005... <Preview truncated at 128 characters>
ENSG00000118276	306.969	1.41729	0.50313	0.103954	4.83994	1.29879e-06	9.95503e-06	18	31622246	31685836	-	B4GALT6	beta-1%2C4-galactosyltransferase 6 [Source:HGNC Symbol%3BAcc:HGNC:929]	GO:0005975:carbohydrate metabolic process;GO:0022010:central nervous system myelination;GO:0021955:central nervous system neuron... <Preview truncated at 128 characters>	GO:0005794:Golgi apparatus;GO:0032580:Golgi cisterna membrane;GO:0000139:Golgi membrane;GO:0016021:integral component of membran... <Preview truncated at 128 characters>	GO:0008378:galactosyltransferase activity;GO:0046872:metal ion binding;GO:0008489:UDP-galactose:glucosylceramide beta-1,4-galact... <Preview truncated at 128 characters>	K07553	;ko00600 Sphingolipid metabolism;ko01100 Metabolic pathways;
ENSG00000247081	127.687	0.701286	-0.511924	0.177292	-2.88747	0.00388351	0.0142461	8	103153394	103298772	-	BAALC-AS1	BAALC antisense RNA 1 [Source:HGNC Symbol%3BAcc:HGNC:50461]	-	-	-	-	-
ENSG00000186318	478.488	0.768048	-0.380732	0.0834526	-4.56225	5.06076e-06	3.51977e-05	11	117285232	117316259	-	BACE1	beta-secretase 1 [Source:HGNC Symbol%3BAcc:HGNC:933]	GO:1990000:amyloid fibril formation;GO:0042987:amyloid precursor protein catabolic process;GO:0034205:beta-amyloid formation;GO:... <Preview truncated at 128 characters>	GO:0030424:axon;GO:0009986:cell surface;GO:0030425:dendrite;GO:0005769:early endosome;GO:0005788:endoplasmic reticulum lumen;GO:... <Preview truncated at 128 characters>	GO:0001540:beta-amyloid binding;GO:0004190:aspartic-type endopeptidase activity;GO:0008798:beta-aspartyl-peptidase activity;GO:0... <Preview truncated at 128 characters>	K04521	;ko05010 Alzheimer disease;
ENSG00000278768	109.121	0.719914	-0.474103	0.178183	-2.66077	0.00779631	0.0260926	11	117288453	117293578	+	BACE1-AS	BACE1 antisense RNA [Source:HGNC Symbol%3BAcc:HGNC:37125]	-	-	-	-	-
ENSG00000156273	749.091	0.821183	-0.284225	0.082305	-3.45331	0.00055375	0.00253982	21	29194071	29630751	+	BACH1	BTB domain and CNC homolog 1 [Source:HGNC Symbol%3BAcc:HGNC:935]	GO:0006281:DNA repair;GO:0000122:negative regulation of transcription from RNA polymerase II promoter;GO:0006357:regulation of t... <Preview truncated at 128 characters>	GO:0000785:chromatin;GO:0005737:cytoplasm;GO:0005829:cytosol;GO:0005654:nucleoplasm;GO:0005634:nucleus;	GO:0001228:RNA polymerase II transcription regulatory region sequence-specific DNA binding transcription factor activity involve... <Preview truncated at 128 characters>	K09042;K05201	-;ko04080 Neuroactive ligand-receptor interaction;ko04724 Glutamatergic synapse;
ENSG00000107262	1175.89	0.746991	-0.420837	0.0628533	-6.69554	2.14881e-11	3.19608e-10	9	33247820	33264720	-	BAG1	BAG cochaperone 1 [Source:HGNC Symbol%3BAcc:HGNC:937]	GO:0006915:apoptotic process;GO:0007166:cell surface receptor signaling pathway;GO:0051085:chaperone mediated protein folding re... <Preview truncated at 128 characters>	GO:0005737:cytoplasm;GO:0005829:cytosol;GO:0016020:membrane;GO:0005634:nucleus;GO:0005654:nucleoplasm;	GO:0000774:adenyl-nucleotide exchange factor activity;GO:0051087:chaperone binding;GO:0031072:heat shock protein binding;GO:0031... <Preview truncated at 128 characters>	K09555	;ko04141 Protein processing in endoplasmic reticulum;
ENSG00000112208	452.321	1.66679	0.737071	0.100533	7.33164	2.27346e-13	4.24864e-12	6	57172326	57189833	+	BAG2	BAG cochaperone 2 [Source:HGNC Symbol%3BAcc:HGNC:938]	GO:0032091:negative regulation of protein binding;GO:0031397:negative regulation of protein ubiquitination;GO:1901800:positive r... <Preview truncated at 128 characters>	GO:0030424:axon;GO:0005829:cytosol;GO:0030425:dendrite;GO:1901588:dendritic microtubule;	GO:0000774:adenyl-nucleotide exchange factor activity;GO:0051087:chaperone binding;GO:0031072:heat shock protein binding;GO:0042... <Preview truncated at 128 characters>	K09556	;ko04141 Protein processing in endoplasmic reticulum;
ENSG00000226137	144.826	0.717472	-0.479006	0.152065	-3.15	0.00163268	0.00668682	17	81029130	81034881	-	BAIAP2-DT	BAIAP2 divergent transcript [Source:HGNC Symbol%3BAcc:HGNC:44342]	-	-	-	-	-
ENSG00000043039	268.144	0.765602	-0.385334	0.110236	-3.49555	0.000473089	0.00220928	11	129375848	129452279	+	BARX2	BARX homeobox 2 [Source:HGNC Symbol%3BAcc:HGNC:956]	GO:0001502:cartilage condensation;GO:0014902:myotube differentiation;GO:0000122:negative regulation of transcription from RNA po... <Preview truncated at 128 characters>	GO:0015629:actin cytoskeleton;GO:0000785:chromatin;GO:0005829:cytosol;GO:0005794:Golgi apparatus;GO:0005654:nucleoplasm;GO:00056... <Preview truncated at 128 characters>	GO:0003682:chromatin binding;GO:0003677:DNA binding;GO:0001228:RNA polymerase II transcription regulatory region sequence-specif... <Preview truncated at 128 characters>	K09361	-
ENSG00000176788	640.469	1.22489	0.292656	0.0752596	3.88862	0.000100816	0.000546613	5	17065598	17276843	+	BASP1	brain abundant membrane attached signal protein 1 [Source:HGNC Symbol%3BAcc:HGNC:957]	GO:0045892:negative regulation of transcription, DNA-templated;	GO:0030054:cell junction;GO:0008180:COP9 signalosome;GO:0005737:cytoplasm;GO:0030426:growth cone;GO:0016363:nuclear matrix;GO:00... <Preview truncated at 128 characters>	GO:0019904:protein domain specific binding;GO:0000976:transcription regulatory region sequence-specific DNA binding;GO:0003714:t... <Preview truncated at 128 characters>	K17272	-
ENSG00000087088	463.947	1.3812	0.46592	0.0846065	5.5069	3.65199e-08	3.60849e-07	19	48954815	48961798	+	BAX	BCL2 associated X%2C apoptosis regulator [Source:HGNC Symbol%3BAcc:HGNC:959]	GO:0006919:activation of cysteine-type endopeptidase activity involved in apoptotic process;GO:0008635:activation of cysteine-ty... <Preview truncated at 128 characters>	GO:0097145:BAK complex;GO:0097144:BAX complex;GO:0097136:Bcl-2 family protein complex;GO:0005737:cytoplasm;	GO:0051434:BH3 domain binding;GO:0015267:channel activity;GO:0051087:chaperone binding;GO:0030544:Hsp70 protein binding;	K02159	;ko01521 EGFR tyrosine kinase inhibitor resistance;ko01522 Endocrine resistance;ko01524 Platinum drug resistance;ko04071 Sphingo... <Preview truncated at 128 characters>
ENSG00000198604	2956.76	1.22724	0.295413	0.0484497	6.09732	1.07862e-09	1.30796e-08	14	34752731	34875647	-	BAZ1A	bromodomain adjacent to zinc finger domain 1A [Source:HGNC Symbol%3BAcc:HGNC:960]	GO:0006338:chromatin remodeling;GO:0006261:DNA-dependent DNA replication;GO:0016573:histone acetylation;GO:0006357:regulation of... <Preview truncated at 128 characters>	GO:0008623:CHRAC;GO:0000228:nuclear chromosome;GO:0016590:ACF complex;	GO:0046872:metal ion binding;	K11655	-
ENSG00000123636	1049.88	0.744531	-0.425596	0.064549	-6.59337	4.2995e-11	6.14455e-10	2	159318979	159616569	-	BAZ2B	bromodomain adjacent to zinc finger domain 2B [Source:HGNC Symbol%3BAcc:HGNC:963]	GO:0006338:chromatin remodeling;GO:0006357:regulation of transcription from RNA polymerase II promoter;GO:0034472:snRNA 3-end p... <Preview truncated at 128 characters>	GO:0005634:nucleus;GO:0032039:integrator complex;GO:0008290:F-actin capping protein complex;GO:0071203:WASH complex;	GO:0003677:DNA binding;GO:0046872:metal ion binding;GO:0003779:actin binding;	K14443;K12581;K10364	;ko03018 RNA degradation;;ko03018 RNA degradation;;ko04144 Endocytosis;
ENSG00000171159	241.414	0.661061	-0.597144	0.230334	-2.59251	0.00952772	0.0309012	9	128160265	128163924	+	BBLN	bublin coiled coil protein [Source:HGNC Symbol%3BAcc:HGNC:17823]	-	-	-	-	-
ENSG00000187244	2362.18	0.748119	-0.41866	0.0969255	-4.3194	1.56452e-05	9.96246e-05	19	44809071	44821421	+	BCAM	basal cell adhesion molecule (Lutheran blood group) [Source:HGNC Symbol%3BAcc:HGNC:6722]	GO:0007155:cell adhesion;GO:0007160:cell-matrix adhesion;GO:0007165:signal transduction;	GO:0009897:external side of plasma membrane;GO:0070062:extracellular exosome;GO:0005576:extracellular region;GO:0005887:integral... <Preview truncated at 128 characters>	GO:0043236:laminin binding;GO:0005055:laminin receptor activity;GO:0008022:protein C-terminus binding;GO:0004888:transmembrane s... <Preview truncated at 128 characters>	K06578	-
ENSG00000272068	334.389	0.722673	-0.468585	0.104264	-4.49421	6.98284e-06	4.72689e-05	1	156637783	156641004	-	BCAN-AS1	BCAN antisense RNA 1 [Source:HGNC Symbol%3BAcc:HGNC:55233]	-	-	-	-	-
ENSG00000050820	672.447	1.26761	0.342107	0.0817613	4.18422	2.86151e-05	0.000172979	16	75228181	75268053	-	BCAR1	BCAR1 scaffold protein%2C Cas family member [Source:HGNC Symbol%3BAcc:HGNC:971]	GO:0007015:actin filament organization;GO:0090527:actin filament reorganization;GO:0050851:antigen receptor-mediated signaling p... <Preview truncated at 128 characters>	GO:0015629:actin cytoskeleton;GO:0030424:axon;GO:0005737:cytoplasm;GO:0005829:cytosol;GO:0005925:focal adhesion;GO:0030027:lamel... <Preview truncated at 128 characters>	GO:0019901:protein kinase binding;GO:0017124:SH3 domain binding;	K05726	;ko04015 Rap1 signaling pathway;ko04062 Chemokine signaling pathway;ko04510 Focal adhesion;ko04670 Leukocyte transendothelial mi... <Preview truncated at 128 characters>
ENSG00000137936	1215.17	1.47084	0.55664	0.062281	8.93755	3.97896e-19	1.252e-17	1	93561741	93847150	-	BCAR3	BCAR3 adaptor protein%2C NSP family member [Source:HGNC Symbol%3BAcc:HGNC:973]	GO:0086100:endothelin receptor signaling pathway;GO:0008286:insulin receptor signaling pathway;GO:0002089:lens morphogenesis in ... <Preview truncated at 128 characters>	GO:0005737:cytoplasm;GO:0005925:focal adhesion;GO:0016020:membrane;	GO:0005085:guanyl-nucleotide exchange factor activity;GO:0019900:kinase binding;GO:0001784:phosphotyrosine binding;	K12606	;ko03018 RNA degradation;
ENSG00000116752	984.56	1.22345	0.290958	0.0692995	4.19855	2.68629e-05	0.000163198	1	114567557	114581629	-	BCAS2	BCAS2 pre-mRNA processing factor [Source:HGNC Symbol%3BAcc:HGNC:975]	GO:0000398:mRNA splicing, via spliceosome;GO:0008380:RNA splicing;GO:0000375:RNA splicing, via transesterification reactions;	GO:0071013:catalytic step 2 spliceosome;GO:0005813:centrosome;GO:0016607:nuclear speck;GO:0005730:nucleolus;GO:0005654:nucleopla... <Preview truncated at 128 characters>	-	K12861	;ko03040 Spliceosome;
ENSG00000141376	205.63	0.734193	-0.445768	0.131743	-3.38361	0.000715389	0.00319292	17	60677453	61392838	+	BCAS3	BCAS3 microtubule associated cell migration factor [Source:HGNC Symbol%3BAcc:HGNC:14347]	GO:0090630:activation of GTPase activity;GO:0001525:angiogenesis;GO:0071391:cellular response to estrogen stimulus;GO:0007030:Go... <Preview truncated at 128 characters>	GO:0031252:cell leading edge;GO:0005737:cytoplasm;GO:0005881:cytoplasmic microtubule;GO:0045111:intermediate filament cytoskelet... <Preview truncated at 128 characters>	GO:0010698:acetyltransferase activator activity;GO:0048487:beta-tubulin binding;GO:0003682:chromatin binding;GO:0035035:histone ... <Preview truncated at 128 characters>	K05632;K18047	-
ENSG00000060982	1731.81	1.43462	0.520671	0.0639711	8.13915	3.98052e-16	9.63454e-15	12	24810024	24949101	-	BCAT1	branched chain amino acid transaminase 1 [Source:HGNC Symbol%3BAcc:HGNC:976]	GO:0009082:branched-chain amino acid biosynthetic process;GO:0000082:G1/S transition of mitotic cell cycle;GO:0009098:leucine bi... <Preview truncated at 128 characters>	GO:0005829:cytosol;GO:0005739:mitochondrion;	GO:0004084:branched-chain-amino-acid transaminase activity;GO:0042802:identical protein binding;GO:0052656:L-isoleucine transami... <Preview truncated at 128 characters>	K00826;K02927	;ko00270 Cysteine and methionine metabolism;ko00280 Valine, leucine and isoleucine degradation;ko00290 Valine, leucine and isole... <Preview truncated at 128 characters>
ENSG00000107949	1968.49	1.39388	0.479106	0.0618806	7.74242	9.75386e-15	2.06266e-13	10	125823546	125853695	+	BCCIP	BRCA2 and CDKN1A interacting protein [Source:HGNC Symbol%3BAcc:HGNC:978]	GO:0006281:DNA repair;GO:0000132:establishment of mitotic spindle orientation;GO:0034453:microtubule anchoring;GO:0000226:microt... <Preview truncated at 128 characters>	GO:0005814:centriole;GO:0005813:centrosome;GO:0005829:cytosol;GO:0097431:mitotic spindle pole;GO:0019908:nuclear cyclin-dependen... <Preview truncated at 128 characters>	GO:0019207:kinase regulator activity;GO:0003723:RNA binding;GO:0015631:tubulin binding;	K15262	-
ENSG00000083123	382.088	0.79478	-0.331372	0.101822	-3.25443	0.00113619	0.00483906	6	80106647	80346270	+	BCKDHB	branched chain keto acid dehydrogenase E1 subunit beta [Source:HGNC Symbol%3BAcc:HGNC:987]	GO:0009083:branched-chain amino acid catabolic process;GO:0007584:response to nutrient;GO:0051591:response to cAMP;GO:0051384:re... <Preview truncated at 128 characters>	GO:0005947:mitochondrial alpha-ketoglutarate dehydrogenase complex;GO:0005759:mitochondrial matrix;GO:0005739:mitochondrion;GO:0... <Preview truncated at 128 characters>	GO:0003863:3-methyl-2-oxobutanoate dehydrogenase (2-methylpropanoyl-transferring) activity;GO:0044877:macromolecular complex bin... <Preview truncated at 128 characters>	K00167	;ko00280 Valine, leucine and isoleucine degradation;ko00640 Propanoate metabolism;ko01100 Metabolic pathways;
ENSG00000153094	462.14	0.710407	-0.493282	0.0848829	-5.81133	6.19779e-09	6.85929e-08	2	111119378	111168445	+	BCL2L11	BCL2 like 11 [Source:HGNC Symbol%3BAcc:HGNC:994]	GO:0006919:activation of cysteine-type endopeptidase activity involved in apoptotic process;GO:0006915:apoptotic process;GO:1902... <Preview truncated at 128 characters>	GO:0097136:Bcl-2 family protein complex;GO:0097141:BIM-BCL-2 complex;GO:0097140:BIM-BCL-xl complex;GO:0005829:cytosol;GO:0012505... <Preview truncated at 128 characters>	GO:0008017:microtubule binding;GO:0019901:protein kinase binding;	K16341	;ko01521 EGFR tyrosine kinase inhibitor resistance;ko04068 FoxO signaling pathway;ko04151 PI3K-Akt signaling pathway;ko04210 Apo... <Preview truncated at 128 characters>
ENSG00000113916	269.952	0.510168	-0.970954	0.122365	-7.93491	2.10643e-15	4.72265e-14	3	187721377	187745725	-	BCL6	BCL6 transcription repressor [Source:HGNC Symbol%3BAcc:HGNC:1001]	GO:0030036:actin cytoskeleton organization;GO:0030183:B cell differentiation;GO:0000902:cell morphogenesis;GO:0006974:cellular r... <Preview truncated at 128 characters>	GO:0005794:Golgi apparatus;GO:0005730:nucleolus;GO:0005654:nucleoplasm;GO:0005634:nucleus;GO:0005657:replication fork;	GO:0003682:chromatin binding;GO:0031490:chromatin DNA binding;GO:0003700:sequence-specific DNA binding transcription factor acti... <Preview truncated at 128 characters>	K15618	;ko04068 FoxO signaling pathway;ko05202 Transcriptional misregulation in cancer;
ENSG00000183337	1009.16	1.19472	0.256676	0.0643102	3.99121	6.57371e-05	0.000369708	X	40049815	40177329	-	BCOR	BCL6 corepressor [Source:HGNC Symbol%3BAcc:HGNC:20893]	GO:0001835:blastocyst hatching;GO:0007507:heart development;GO:0035518:histone H2A monoubiquitination;GO:0030502:negative regula... <Preview truncated at 128 characters>	GO:0005654:nucleoplasm;GO:0005634:nucleus;	GO:0031072:heat shock protein binding;GO:0042826:histone deacetylase binding;GO:0000977:RNA polymerase II regulatory region sequ... <Preview truncated at 128 characters>	-	-
ENSG00000074582	478.748	1.37	0.454179	0.0855612	5.30823	1.10693e-07	1.01362e-06	2	218658764	218663443	+	BCS1L	BCS1 homolog%2C ubiquinol-cytochrome c reductase complex chaperone [Source:HGNC Symbol%3BAcc:HGNC:1020]	GO:0033617:mitochondrial respiratory chain complex IV assembly;GO:0032981:mitochondrial respiratory chain complex I assembly;GO:... <Preview truncated at 128 characters>	GO:0005743:mitochondrial inner membrane;GO:0005750:mitochondrial respiratory chain complex III;GO:0005739:mitochondrion;GO:00160... <Preview truncated at 128 characters>	GO:0005524:ATP binding;	K08900	-
ENSG00000164039	129.189	0.720851	-0.472227	0.15906	-2.96885	0.00298912	0.011306	4	103077592	103099870	-	BDH2	3-hydroxybutyrate dehydrogenase 2 [Source:HGNC Symbol%3BAcc:HGNC:32389]	GO:0030855:epithelial cell differentiation;GO:0006635:fatty acid beta-oxidation;GO:0042168:heme metabolic process;GO:0055072:iro... <Preview truncated at 128 characters>	GO:0005737:cytoplasm;GO:0005829:cytosol;GO:0070062:extracellular exosome;	GO:0003858:3-hydroxybutyrate dehydrogenase activity;GO:0051287:NAD binding;GO:0016628:oxidoreductase activity, acting on the CH-... <Preview truncated at 128 characters>	K00019	;ko00072 Synthesis and degradation of ketone bodies;ko00650 Butanoate metabolism;ko01100 Metabolic pathways;
ENSG00000178409	139.277	2.04011	1.02865	0.164704	6.24543	4.22629e-10	5.42403e-09	6	107065182	107115515	-	BEND3	BEN domain containing 3 [Source:HGNC Symbol%3BAcc:HGNC:23040]	GO:0006306:DNA methylation;GO:0098532:histone H3-K27 trimethylation;GO:0080182:histone H3-K4 trimethylation;GO:0036124:histone H... <Preview truncated at 128 characters>	GO:0000792:heterochromatin;GO:0005730:nucleolus;GO:0005654:nucleoplasm;	GO:0000182:rDNA binding;	-	-
ENSG00000134107	902.688	0.775281	-0.367208	0.0697471	-5.26485	1.40303e-07	1.26696e-06	3	4979437	4985323	+	BHLHE40	basic helix-loop-helix family member e40 [Source:HGNC Symbol%3BAcc:HGNC:1046]	GO:0009952:anterior/posterior pattern specification;GO:0032922:circadian regulation of gene expression;GO:0007623:circadian rhyt... <Preview truncated at 128 characters>	GO:0000785:chromatin;GO:0005737:cytoplasm;GO:0016604:nuclear body;GO:0005634:nucleus;	GO:0043425:bHLH transcription factor binding;GO:0003700:sequence-specific DNA binding transcription factor activity;GO:0000981:s... <Preview truncated at 128 characters>	K03729	;ko04710 Circadian rhythm;
ENSG00000123095	2047.32	0.572336	-0.805067	0.121506	-6.62576	3.4547e-11	4.988e-10	12	26120030	26125037	-	BHLHE41	basic helix-loop-helix family member e41 [Source:HGNC Symbol%3BAcc:HGNC:16617]	GO:0009952:anterior/posterior pattern specification;GO:0032922:circadian regulation of gene expression;GO:0010832:negative regul... <Preview truncated at 128 characters>	GO:0000785:chromatin;GO:0005634:nucleus;	GO:0043425:bHLH transcription factor binding;GO:0000981:sequence-specific DNA binding RNA polymerase II transcription factor act... <Preview truncated at 128 characters>	K03730	;ko04710 Circadian rhythm;
ENSG00000151746	335.577	1.44035	0.526415	0.117872	4.466	7.96972e-06	5.33948e-05	12	32106835	32383633	+	BICD1	BICD cargo adaptor 1 [Source:HGNC Symbol%3BAcc:HGNC:1049]	GO:0009653:anatomical structure morphogenesis;GO:0008298:intracellular mRNA localization;GO:0072393:microtubule anchoring at mic... <Preview truncated at 128 characters>	GO:0005813:centrosome;GO:0031410:cytoplasmic vesicle;GO:0005856:cytoskeleton;GO:0005829:cytosol;GO:0005794:Golgi apparatus;GO:00... <Preview truncated at 128 characters>	GO:0008093:cytoskeletal adaptor activity;GO:0034452:dynactin binding;GO:0070840:dynein complex binding;GO:0045505:dynein interme... <Preview truncated at 128 characters>	K18739	-
ENSG00000135127	106.355	1.65032	0.722743	0.183734	3.93364	8.36698e-05	0.0004616	12	119989236	120094494	+	BICDL1	BICD family like cargo adaptor 1 [Source:HGNC Symbol%3BAcc:HGNC:28095]	GO:0055107:Golgi to secretory granule transport;GO:0031175:neuron projection development;GO:0047496:vesicle transport along micr... <Preview truncated at 128 characters>	GO:0005813:centrosome;GO:0005737:cytoplasm;	GO:0034452:dynactin binding;GO:0031267:small GTPase binding;	K16756	-
ENSG00000162069	250.7	0.822148	-0.28253	0.117013	-2.41453	0.0157557	0.0476298	16	3027682	3036944	-	BICDL2	BICD family like cargo adaptor 2 [Source:HGNC Symbol%3BAcc:HGNC:33584]	GO:0055107:Golgi to secretory granule transport;GO:0047496:vesicle transport along microtubule;	GO:0005737:cytoplasm;	GO:0031267:small GTPase binding;	K16756	-
ENSG00000112624	553.519	0.824922	-0.277671	0.0785806	-3.53358	0.00040997	0.00194589	6	42746958	42868558	+	BICRAL	BICRA like chromatin remodeling complex associated protein [Source:HGNC Symbol%3BAcc:HGNC:21111]	GO:0045893:positive regulation of transcription, DNA-templated;	GO:0016514:SWI/SNF complex;	-	-	-
ENSG00000015475	717.2	1.22792	0.296219	0.0699496	4.23475	2.28802e-05	0.000140594	22	17734138	17774770	-	BID	BH3 interacting domain death agonist [Source:HGNC Symbol%3BAcc:HGNC:1050]	GO:0006919:activation of cysteine-type endopeptidase activity involved in apoptotic process;GO:0008637:apoptotic mitochondrial c... <Preview truncated at 128 characters>	GO:0005829:cytosol;GO:0032592:integral component of mitochondrial membrane;GO:0016020:membrane;GO:0005741:mitochondrial outer me... <Preview truncated at 128 characters>	GO:0005123:death receptor binding;GO:0031625:ubiquitin protein ligase binding;	K04726	;ko01524 Platinum drug resistance;ko04071 Sphingolipid signaling pathway;ko04115 p53 signaling pathway;ko04210 Apoptosis;ko04215... <Preview truncated at 128 characters>
ENSG00000147439	318.189	1.20365	0.267421	0.0997204	2.6817	0.00732485	0.0247461	8	22620418	22669148	-	BIN3	bridging integrator 3 [Source:HGNC Symbol%3BAcc:HGNC:1054]	GO:0051666:actin cortical patch localization;GO:0007015:actin filament organization;GO:0061640:cytoskeleton-dependent cytokinesi... <Preview truncated at 128 characters>	GO:0015629:actin cytoskeleton;GO:0005737:cytoplasm;GO:0005856:cytoskeleton;	GO:0008093:cytoskeletal adaptor activity;	K11447	;ko05202 Transcriptional misregulation in cancer;
ENSG00000110330	2014.95	0.829836	-0.269101	0.0598671	-4.49498	6.95777e-06	4.71341e-05	11	102347211	102378670	+	BIRC2	baculoviral IAP repeat containing 2 [Source:HGNC Symbol%3BAcc:HGNC:590]	GO:0007166:cell surface receptor signaling pathway;GO:0007249:I-kappaB kinase/NF-kappaB signaling;GO:0070266:necroptotic process... <Preview truncated at 128 characters>	GO:0035631:CD40 receptor complex;GO:0005737:cytoplasm;GO:0009898:cytoplasmic side of plasma membrane;GO:0005829:cytosol;GO:00451... <Preview truncated at 128 characters>	GO:0051087:chaperone binding;GO:0043027:cysteine-type endopeptidase inhibitor activity involved in apoptotic process;GO:0098770:... <Preview truncated at 128 characters>	K16060	;ko01524 Platinum drug resistance;ko04064 NF-kappa B signaling pathway;ko04120 Ubiquitin mediated proteolysis;ko04210 Apoptosis;... <Preview truncated at 128 characters>
ENSG00000023445	366.786	0.651579	-0.617988	0.0983355	-6.28448	3.28943e-10	4.26971e-09	11	102317450	102339403	+	BIRC3	baculoviral IAP repeat containing 3 [Source:HGNC Symbol%3BAcc:HGNC:591]	GO:0007166:cell surface receptor signaling pathway;GO:0007249:I-kappaB kinase/NF-kappaB signaling;GO:0043066:negative regulation... <Preview truncated at 128 characters>	GO:0005737:cytoplasm;GO:0005829:cytosol;GO:0045121:membrane raft;GO:0005654:nucleoplasm;GO:0005634:nucleus;GO:0032991:macromolec... <Preview truncated at 128 characters>	GO:0043027:cysteine-type endopeptidase inhibitor activity involved in apoptotic process;GO:0046872:metal ion binding;GO:0044877:... <Preview truncated at 128 characters>	K16060;K09228	;ko01524 Platinum drug resistance;ko04064 NF-kappa B signaling pathway;ko04120 Ubiquitin mediated proteolysis;ko04210 Apoptosis;... <Preview truncated at 128 characters>
ENSG00000197299	1611.68	1.37649	0.460996	0.0529152	8.71197	2.98642e-18	8.72035e-17	15	90717346	90816166	+	BLM	BLM RecQ like helicase [Source:HGNC Symbol%3BAcc:HGNC:1058]	GO:0072757:cellular response to camptothecin;GO:0006974:cellular response to DNA damage stimulus;GO:0072711:cellular response to... <Preview truncated at 128 characters>	GO:0005694:chromosome;GO:0005737:cytoplasm;GO:0005829:cytosol;GO:0000800:lateral element;GO:0000228:nuclear chromosome;GO:001636... <Preview truncated at 128 characters>	GO:0043138:3-5 DNA helicase activity;GO:0005524:ATP binding;GO:0008094:DNA-dependent ATPase activity;GO:0000405:bubble DNA bin... <Preview truncated at 128 characters>	K10901	;ko03440 Homologous recombination;ko03460 Fanconi anemia pathway;
ENSG00000090013	269.146	0.710119	-0.493866	0.11819	-4.17859	2.93317e-05	0.000177077	19	40447765	40465764	-	BLVRB	biliverdin reductase B [Source:HGNC Symbol%3BAcc:HGNC:1063]	GO:0042167:heme catabolic process;	GO:0005829:cytosol;GO:0070062:extracellular exosome;GO:0043231:intracellular membrane-bounded organelle;GO:0005654:nucleoplasm;G... <Preview truncated at 128 characters>	GO:0004074:biliverdin reductase activity;GO:0042602:riboflavin reductase (NADPH) activity;	K05901	;ko00740 Riboflavin metabolism;ko00860 Porphyrin and chlorophyll metabolism;ko01100 Metabolic pathways;
ENSG00000104081	189.088	0.395391	-1.33865	0.143785	-9.31007	1.27753e-20	4.47502e-19	15	40087890	40108892	-	BMF	Bcl2 modifying factor [Source:HGNC Symbol%3BAcc:HGNC:24132]	GO:0043276:anoikis;GO:0034644:cellular response to UV;GO:0010507:negative regulation of autophagy;GO:0043065:positive regulation... <Preview truncated at 128 characters>	GO:0001669:acrosomal vesicle;GO:0005829:cytosol;GO:0005741:mitochondrial outer membrane;GO:0016459:myosin complex;GO:0005886:pla... <Preview truncated at 128 characters>	-	K17460	;ko05206 MicroRNAs in cancer;
ENSG00000168283	973.934	1.20835	0.273033	0.060669	4.50037	6.78353e-06	4.6005e-05	10	22321099	22331484	+	BMI1	BMI1 proto-oncogene%2C polycomb ring finger [Source:HGNC Symbol%3BAcc:HGNC:1066]	GO:0007420:brain development;GO:0071549:cellular response to dexamethasone stimulus;GO:0071347:cellular response to interleukin-... <Preview truncated at 128 characters>	GO:0005829:cytosol;GO:0000792:heterochromatin;GO:0016604:nuclear body;GO:0005654:nucleoplasm;GO:0005634:nucleus;GO:0031519:PcG p... <Preview truncated at 128 characters>	GO:0071535:RING-like zinc finger domain binding;GO:0000978:RNA polymerase II core promoter proximal region sequence-specific DNA... <Preview truncated at 128 characters>	K11459	;ko04550 Signaling pathways regulating pluripotency of stem cells;ko05202 Transcriptional misregulation in cancer;ko05206 MicroR... <Preview truncated at 128 characters>
ENSG00000168487	1012	0.681661	-0.552873	0.0623905	-8.86149	7.89536e-19	2.40954e-17	8	22165140	22212326	+	BMP1	bone morphogenetic protein 1 [Source:HGNC Symbol%3BAcc:HGNC:1067]	GO:0051216:cartilage development;GO:0030154:cell differentiation;GO:0001503:ossification;GO:0001502:cartilage condensation;GO:00... <Preview truncated at 128 characters>	GO:0005615:extracellular space;GO:0005794:Golgi apparatus;GO:0005576:extracellular region;GO:0031982:vesicle;	GO:0005509:calcium ion binding;GO:0005125:cytokine activity;GO:0008083:growth factor activity;GO:0004222:metalloendopeptidase ac... <Preview truncated at 128 characters>	K05502	-
ENSG00000125845	158.984	0.772782	-0.371866	0.139902	-2.65805	0.00785938	0.0262459	20	6767686	6780246	+	BMP2	bone morphogenetic protein 2 [Source:HGNC Symbol%3BAcc:HGNC:1069]	GO:0000187:activation of MAPK activity;GO:0009887:organ morphogenesis;GO:0003176:aortic valve development;	GO:0070724:BMP receptor complex;GO:0009986:cell surface;GO:0005576:extracellular region;GO:0005615:extracellular space;	GO:0070700:BMP receptor binding;GO:0039706:co-receptor binding;GO:0005125:cytokine activity;GO:0008083:growth factor activity;	K04662	;ko04013 MAPK signaling pathway - fly;ko04060 Cytokine-cytokine receptor interaction;ko04341 Hedgehog signaling pathway - fly;ko... <Preview truncated at 128 characters>
ENSG00000152785	171.311	0.373895	-1.41929	0.14474	-9.80584	1.0626e-22	4.20659e-21	4	81030708	81057627	+	BMP3	bone morphogenetic protein 3 [Source:HGNC Symbol%3BAcc:HGNC:1070]	GO:0051216:cartilage development;GO:0007267:cell-cell signaling;GO:0001649:osteoblast differentiation;GO:0010862:positive regula... <Preview truncated at 128 characters>	GO:0070062:extracellular exosome;GO:0005615:extracellular space;	GO:0070700:BMP receptor binding;GO:0005125:cytokine activity;GO:0008083:growth factor activity;GO:0005102:receptor binding;	K05496	;ko04060 Cytokine-cytokine receptor interaction;
ENSG00000101144	571.583	0.670196	-0.577346	0.0798761	-7.22801	4.90107e-13	8.77768e-12	20	57168753	57266641	-	BMP7	bone morphogenetic protein 7 [Source:HGNC Symbol%3BAcc:HGNC:1074]	GO:0007411:axon guidance;GO:0030509:BMP signaling pathway;GO:0060445:branching involved in salivary gland morphogenesis;	GO:0005576:extracellular region;GO:0005615:extracellular space;GO:0031982:vesicle;	GO:0070700:BMP receptor binding;GO:0005125:cytokine activity;GO:0008083:growth factor activity;GO:0008201:heparin binding;	K16621	;ko04060 Cytokine-cytokine receptor interaction;ko04350 TGF-beta signaling pathway;ko04360 Axon guidance;ko04390 Hippo signaling... <Preview truncated at 128 characters>
ENSG00000204217	1720.35	0.740922	-0.432607	0.0506462	-8.54175	1.32199e-17	3.63897e-16	2	202376327	202567751	+	BMPR2	bone morphogenetic protein receptor type 2 [Source:HGNC Symbol%3BAcc:HGNC:1078]	GO:0009952:anterior/posterior pattern specification;GO:0003176:aortic valve development;GO:0060840:artery development;GO:0060413... <Preview truncated at 128 characters>	GO:0005912:adherens junction;GO:0016324:apical plasma membrane;GO:0009925:basal plasma membrane;GO:0005901:caveola;	GO:0016362:activin receptor activity, type II;GO:0005524:ATP binding;GO:0036122:BMP binding;	K04671	;ko04060 Cytokine-cytokine receptor interaction;ko04350 TGF-beta signaling pathway;ko04360 Axon guidance;ko04390 Hippo signaling... <Preview truncated at 128 characters>
ENSG00000165733	2445.58	1.29081	0.368275	0.0570499	6.45531	1.07994e-10	1.47743e-09	10	42782795	42834937	+	BMS1	BMS1 ribosome biogenesis factor [Source:HGNC Symbol%3BAcc:HGNC:23505]	GO:0000479:endonucleolytic cleavage of tricistronic rRNA transcript (SSU-rRNA, 5.8S rRNA, LSU-rRNA);GO:0000462:maturation of SSU... <Preview truncated at 128 characters>	GO:0030686:90S preribosome;GO:0005694:chromosome;GO:0005730:nucleolus;GO:0005654:nucleoplasm;	GO:0005524:ATP binding;GO:0005525:GTP binding;GO:0003924:GTPase activity;GO:0003723:RNA binding;GO:0034511:U3 snoRNA binding;	K14569	;ko03008 Ribosome biogenesis in eukaryotes;
ENSG00000164603	157.203	0.764251	-0.387882	0.149489	-2.59473	0.00946665	0.0307414	7	112819147	112939875	-	BMT2	base methyltransferase of 25S rRNA 2 homolog [Source:HGNC Symbol%3BAcc:HGNC:26475]	GO:0034198:cellular response to amino acid starvation;GO:1904262:negative regulation of TORC1 signaling;	GO:0005829:cytosol;GO:0005730:nucleolus;	GO:0016433:rRNA (adenine) methyltransferase activity;GO:1904047:S-adenosyl-L-methionine binding;	-	-
ENSG00000145919	859.195	1.20009	0.263145	0.0673516	3.90703	9.34382e-05	0.000511012	5	173607145	173616659	-	BOD1	biorientation of chromosomes in cell division 1 [Source:HGNC Symbol%3BAcc:HGNC:25114]	GO:0051301:cell division;GO:0007080:mitotic metaphase plate congression;GO:0071962:mitotic sister chromatid cohesion, centromeri... <Preview truncated at 128 characters>	GO:0005813:centrosome;GO:0005737:cytoplasm;GO:0000940:condensed chromosome outer kinetochore;GO:0005876:spindle microtubule;GO:0... <Preview truncated at 128 characters>	GO:0051721:protein phosphatase 2A binding;GO:0004864:protein phosphatase inhibitor activity;	-	-
ENSG00000163170	335.583	1.4516	0.537641	0.101218	5.31171	1.08603e-07	9.96982e-07	2	74135400	74147912	-	BOLA3	bolA family member 3 [Source:HGNC Symbol%3BAcc:HGNC:24415]	-	GO:0005829:cytosol;GO:0005739:mitochondrion;GO:0016604:nuclear body;	-	K09228	;ko05168 Herpes simplex virus 1 infection;
ENSG00000261236	506.836	1.76888	0.822835	0.0998706	8.239	1.73651e-16	4.32351e-15	8	144262045	144291438	-	BOP1	BOP1 ribosomal biogenesis factor [Source:HGNC Symbol%3BAcc:HGNC:15519]	GO:0008283:cell proliferation;GO:0000448:cleavage in ITS2 between 5.8S rRNA and LSU-rRNA of tricistronic rRNA transcript (SSU-rR... <Preview truncated at 128 characters>	GO:0005694:chromosome;GO:0005730:nucleolus;GO:0005654:nucleoplasm;GO:0070545:PeBoW complex;GO:0030687:preribosome, large subunit... <Preview truncated at 128 characters>	GO:0043021:ribonucleoprotein complex binding;GO:0003723:RNA binding;	K14824	-
ENSG00000137274	242.284	0.805926	-0.311281	0.116315	-2.67619	0.00744646	0.0250873	6	3118374	3153578	+	BPHL	biphenyl hydrolase like [Source:HGNC Symbol%3BAcc:HGNC:1094]	GO:0006520:cellular amino acid metabolic process;GO:0009636:response to toxic substance;GO:0006805:xenobiotic metabolic process;	GO:0005741:mitochondrial outer membrane;GO:0005739:mitochondrion;	GO:0047658:alpha-amino-acid esterase activity;	K18399	-
ENSG00000112983	1440.71	0.838384	-0.254318	0.0548421	-4.63727	3.53045e-06	2.52076e-05	5	138139770	138178953	-	BRD8	bromodomain containing 8 [Source:HGNC Symbol%3BAcc:HGNC:19874]	GO:0097067:cellular response to thyroid hormone stimulus;GO:0016573:histone acetylation;GO:0043968:histone H2A acetylation;GO:00... <Preview truncated at 128 characters>	GO:0005739:mitochondrion;GO:0035267:NuA4 histone acetyltransferase complex;GO:0005654:nucleoplasm;GO:0000812:Swr1 complex;	GO:0030374:ligand-dependent nuclear receptor transcription coactivator activity;GO:0046966:thyroid hormone receptor binding;	K11321	-
ENSG00000028310	627.524	1.23075	0.299536	0.0858186	3.49033	0.000482417	0.00224824	5	850291	892801	-	BRD9	bromodomain containing 9 [Source:HGNC Symbol%3BAcc:HGNC:25818]	GO:0006325:chromatin organization;GO:0006357:regulation of transcription from RNA polymerase II promoter;GO:0018230:peptidyl-L-c... <Preview truncated at 128 characters>	GO:0005654:nucleoplasm;GO:0005634:nucleus;GO:0016514:SWI/SNF complex;GO:0005783:endoplasmic reticulum;GO:0005789:endoplasmic ret... <Preview truncated at 128 characters>	GO:0070577:lysine-acetylated histone binding;GO:0003676:nucleic acid binding;GO:0019706:protein-cysteine S-palmitoyltransferase ... <Preview truncated at 128 characters>	K11723	;ko05225 Hepatocellular carcinoma;
ENSG00000184992	1224.56	1.36161	0.445317	0.0654275	6.80627	1.00161e-11	1.55305e-10	12	124993645	125031231	+	BRI3BP	BRI3 binding protein [Source:HGNC Symbol%3BAcc:HGNC:14251]	-	GO:0016021:integral component of membrane;GO:0005741:mitochondrial outer membrane;GO:0005739:mitochondrion;	-	K17985	;ko04137 Mitophagy - animal;ko04140 Autophagy - animal;ko05010 Alzheimer disease;ko05014 Amyotrophic lateral sclerosis;ko05016 H... <Preview truncated at 128 characters>
ENSG00000113460	1246.21	1.54504	0.627646	0.0680464	9.22379	2.86779e-20	9.7644e-19	5	34915677	34925996	+	BRIX1	biogenesis of ribosomes BRX1 [Source:HGNC Symbol%3BAcc:HGNC:24170]	GO:0000027:ribosomal large subunit assembly;GO:0006364:rRNA processing;	GO:0005694:chromosome;GO:0005730:nucleolus;	GO:0003723:RNA binding;GO:0019843:rRNA binding;	K14820	-
ENSG00000174744	758.497	1.24214	0.312826	0.069475	4.50271	6.70933e-06	4.55356e-05	11	66337333	66345125	-	BRMS1	BRMS1 transcriptional repressor and anoikis regulator [Source:HGNC Symbol%3BAcc:HGNC:17262]	GO:0006915:apoptotic process;GO:0016575:histone deacetylation;GO:0032088:negative regulation of NF-kappaB transcription factor a... <Preview truncated at 128 characters>	GO:0005737:cytoplasm;GO:0005654:nucleoplasm;GO:0005634:nucleus;GO:0070822:Sin3-type complex;	GO:0042826:histone deacetylase binding;GO:0051059:NF-kappaB binding;	K19196	-
ENSG00000156983	238.158	1.31172	0.391461	0.116245	3.36755	0.000758398	0.00337004	3	9731729	9748019	+	BRPF1	bromodomain and PHD finger containing 1 [Source:HGNC Symbol%3BAcc:HGNC:14255]	GO:0043966:histone H3 acetylation;GO:0044154:histone H3-K14 acetylation;GO:0043972:histone H3-K23 acetylation;GO:0045893:positiv... <Preview truncated at 128 characters>	GO:0005694:chromosome;GO:0005737:cytoplasm;GO:0005829:cytosol;GO:0000123:histone acetyltransferase complex;GO:0070776:MOZ/MORF h... <Preview truncated at 128 characters>	GO:0010698:acetyltransferase activator activity;GO:0003677:DNA binding;GO:0042393:histone binding;GO:0046872:metal ion binding;	K11348	-
ENSG00000185658	1417.83	0.810588	-0.302959	0.0637884	-4.74944	2.03979e-06	1.51757e-05	21	39184176	39321559	-	BRWD1	bromodomain and WD repeat domain containing 1 [Source:HGNC Symbol%3BAcc:HGNC:12760]	GO:0007010:cytoskeleton organization;GO:0008360:regulation of cell shape;GO:0006357:regulation of transcription from RNA polymer... <Preview truncated at 128 characters>	GO:0005829:cytosol;GO:0005730:nucleolus;GO:0005654:nucleoplasm;GO:0005634:nucleus;	-	K11798	-
ENSG00000165288	1747.13	0.835219	-0.259773	0.0522824	-4.96866	6.74169e-07	5.43685e-06	X	80669503	80809877	-	BRWD3	bromodomain and WD repeat domain containing 3 [Source:HGNC Symbol%3BAcc:HGNC:17342]	GO:0007010:cytoskeleton organization;GO:0008360:regulation of cell shape;GO:0006357:regulation of transcription from RNA polymer... <Preview truncated at 128 characters>	GO:0005634:nucleus;	-	K11798	-
ENSG00000169814	222.037	0.77006	-0.376958	0.125735	-2.99803	0.00271727	0.0104422	3	15601341	15722311	+	BTD	biotinidase [Source:HGNC Symbol%3BAcc:HGNC:1122]	GO:0006768:biotin metabolic process;GO:0007417:central nervous system development;	GO:0070062:extracellular exosome;GO:0005576:extracellular region;GO:0005615:extracellular space;GO:0005759:mitochondrial matrix;	GO:0047708:biotinidase activity;	K01435	;ko00780 Biotin metabolism;ko01100 Metabolic pathways;ko04977 Vitamin digestion and absorption;
ENSG00000134717	1100.93	1.24751	0.31905	0.0592221	5.38735	7.15059e-08	6.74984e-07	1	52056199	52090716	+	BTF3L4	basic transcription factor 3 like 4 [Source:HGNC Symbol%3BAcc:HGNC:30547]	-	GO:0005829:cytosol;GO:0070062:extracellular exosome;GO:0016020:membrane;	GO:0042803:protein homodimerization activity;	K01527	;ko04214 Apoptosis - fly;
ENSG00000133639	1028.67	0.658513	-0.602715	0.0709791	-8.49144	2.04088e-17	5.49352e-16	12	92140278	92145846	-	BTG1	BTG anti-proliferation factor 1 [Source:HGNC Symbol%3BAcc:HGNC:1130]	GO:0016477:cell migration;GO:0030308:negative regulation of cell growth;GO:0008285:negative regulation of cell proliferation;GO:... <Preview truncated at 128 characters>	GO:0005737:cytoplasm;GO:0005654:nucleoplasm;GO:0005634:nucleus;	GO:0019899:enzyme binding;GO:0019900:kinase binding;GO:0003712:transcription cofactor activity;	K14443	;ko03018 RNA degradation;
ENSG00000159388	696.598	0.529188	-0.918148	0.0831406	-11.0433	2.36166e-28	1.31403e-26	1	203305491	203309602	+	BTG2	BTG anti-proliferation factor 2 [Source:HGNC Symbol%3BAcc:HGNC:1131]	GO:0009952:anterior/posterior pattern specification;GO:0008306:associative learning;GO:0006974:cellular response to DNA damage s... <Preview truncated at 128 characters>	GO:0005737:cytoplasm;GO:0005829:cytosol;GO:0070062:extracellular exosome;GO:0005634:nucleus;	GO:0003714:transcription corepressor activity;	K14443	;ko03018 RNA degradation;
ENSG00000154640	333.66	1.24181	0.312447	0.102143	3.05893	0.00222132	0.00876333	21	17593653	17612945	-	BTG3	BTG anti-proliferation factor 3 [Source:HGNC Symbol%3BAcc:HGNC:1132]	GO:0008285:negative regulation of cell proliferation;GO:0045930:negative regulation of mitotic cell cycle;	GO:0005737:cytoplasm;GO:0005634:nucleus;	-	K14443	;ko03018 RNA degradation;
ENSG00000026950	419.599	0.741397	-0.431682	0.0875063	-4.93315	8.09147e-07	6.44281e-06	6	26402237	26415208	+	BTN3A1	butyrophilin subfamily 3 member A1 [Source:HGNC Symbol%3BAcc:HGNC:1138]	GO:0050798:activated T cell proliferation;GO:0002250:adaptive immune response;GO:0001819:positive regulation of cytokine product... <Preview truncated at 128 characters>	GO:0009897:external side of plasma membrane;GO:0016021:integral component of membrane;GO:0005886:plasma membrane;	GO:0005102:receptor binding;	K06712	-
ENSG00000186470	709.78	0.779009	-0.360288	0.0714692	-5.04117	4.62704e-07	3.83659e-06	6	26365159	26378320	+	BTN3A2	butyrophilin subfamily 3 member A2 [Source:HGNC Symbol%3BAcc:HGNC:1139]	GO:0032729:positive regulation of interferon-gamma production;GO:0001817:regulation of cytokine production;GO:0002456:T cell med... <Preview truncated at 128 characters>	GO:0009897:external side of plasma membrane;GO:0016021:integral component of membrane;GO:0016020:membrane;GO:0005886:plasma memb... <Preview truncated at 128 characters>	GO:0005102:receptor binding;	K06712	-
ENSG00000111801	280.4	0.612535	-0.707137	0.11157	-6.33805	2.32684e-10	3.07049e-09	6	26440472	26453415	+	BTN3A3	butyrophilin subfamily 3 member A3 [Source:HGNC Symbol%3BAcc:HGNC:1140]	GO:0001817:regulation of cytokine production;GO:0002456:T cell mediated immunity;GO:0050852:T cell receptor signaling pathway;	GO:0009897:external side of plasma membrane;GO:0016021:integral component of membrane;GO:0016020:membrane;GO:0005886:plasma memb... <Preview truncated at 128 characters>	GO:0005102:receptor binding;	K06712	-
ENSG00000071462	632.492	1.29281	0.37051	0.0846566	4.37662	1.20534e-05	7.83386e-05	7	73683025	73705161	+	BUD23	BUD23 rRNA methyltransferase and ribosome maturation factor [Source:HGNC Symbol%3BAcc:HGNC:16405]	GO:0006325:chromatin organization;GO:2000234:positive regulation of rRNA processing;GO:0070476:rRNA (guanine-N7)-methylation;GO:... <Preview truncated at 128 characters>	GO:0005730:nucleolus;GO:0005654:nucleoplasm;GO:0048471:perinuclear region of cytoplasm;GO:0016021:integral component of membrane... <Preview truncated at 128 characters>	GO:0008168:methyltransferase activity;GO:0046982:protein heterodimerization activity;GO:0003723:RNA binding;GO:0016435:rRNA (gua... <Preview truncated at 128 characters>	K19306;K19374	-
ENSG00000106245	961.73	1.26399	0.337985	0.0753597	4.48495	7.29298e-06	4.91676e-05	7	99408641	99419616	+	BUD31	BUD31 homolog [Source:HGNC Symbol%3BAcc:HGNC:29629]	GO:0000398:mRNA splicing, via spliceosome;GO:2000825:positive regulation of androgen receptor activity;	GO:0000785:chromatin;GO:0005634:nucleus;GO:0005681:spliceosomal complex;GO:0071007:U2-type catalytic step 2 spliceosome;	GO:0016922:ligand-dependent nuclear receptor binding;GO:0030374:ligand-dependent nuclear receptor transcription coactivator acti... <Preview truncated at 128 characters>	K12873;K15696	-
ENSG00000112578	287.368	1.64755	0.720325	0.110189	6.53717	6.26956e-11	8.8015e-10	6	41921499	41933046	+	BYSL	bystin like [Source:HGNC Symbol%3BAcc:HGNC:1157]	GO:0008283:cell proliferation;GO:0000462:maturation of SSU-rRNA from tricistronic rRNA transcript (SSU-rRNA, 5.8S rRNA, LSU-rRNA... <Preview truncated at 128 characters>	GO:0045177:apical part of cell;GO:0005694:chromosome;GO:0005737:cytoplasm;GO:0005730:nucleolus;GO:0005654:nucleoplasm;GO:0030688... <Preview truncated at 128 characters>	GO:0030515:snoRNA binding;GO:0003723:RNA binding;	K14797	-
ENSG00000136261	4103.29	1.18959	0.250464	0.0452154	5.53935	3.036e-08	3.04769e-07	7	16646131	16706523	+	BZW2	basic leucine zipper and W2 domains 2 [Source:HGNC Symbol%3BAcc:HGNC:18808]	GO:0030154:cell differentiation;GO:0007399:nervous system development;	-	-	-	-
ENSG00000171067	308.716	1.61102	0.687974	0.109049	6.30886	2.81094e-10	3.67476e-09	11	68261338	68272001	-	C11orf24	chromosome 11 open reading frame 24 [Source:HGNC Symbol%3BAcc:HGNC:1174]	-	GO:0005794:Golgi apparatus;GO:0016021:integral component of membrane;GO:0043231:intracellular membrane-bounded organelle;GO:0005... <Preview truncated at 128 characters>	-	K11504	-
ENSG00000180425	191.586	0.73883	-0.436685	0.138226	-3.15921	0.00158197	0.00649371	11	114391443	114400511	-	C11orf71	chromosome 11 open reading frame 71 [Source:HGNC Symbol%3BAcc:HGNC:25937]	-	GO:0016604:nuclear body;GO:0005654:nucleoplasm;GO:0005634:nucleus;	-	-	-
ENSG00000173715	557.547	0.837229	-0.256307	0.0799888	-3.20428	0.00135401	0.00565203	11	66744451	66843516	+	C11orf80	chromosome 11 open reading frame 80 [Source:HGNC Symbol%3BAcc:HGNC:26197]	GO:0042138:meiotic DNA double-strand break formation;GO:0007131:reciprocal meiotic recombination;	GO:0005694:chromosome;	-	K10361;K08658	-;ko00900 Terpenoid backbone biosynthesis;
ENSG00000278615	186.322	1.36135	0.445039	0.141359	3.1483	0.00164223	0.00671688	11	62662817	62665210	-	C11orf98	chromosome 11 open reading frame 98 [Source:HGNC Symbol%3BAcc:HGNC:51238]	GO:0045893:positive regulation of transcription, DNA-templated;	GO:0005634:nucleus;	-	-	-
ENSG00000133641	539.619	1.3177	0.398026	0.0832657	4.78019	1.75128e-06	1.31906e-05	12	88033846	88050160	+	C12orf29	chromosome 12 open reading frame 29 [Source:HGNC Symbol%3BAcc:HGNC:25322]	GO:0002244:hematopoietic progenitor cell differentiation;	-	-	K16533;K10408	-;ko05014 Amyotrophic lateral sclerosis;ko05016 Huntington disease;ko05022 Pathways of neurodegeneration - multiple diseases;
ENSG00000204954	159.602	1.58658	0.66592	0.261565	2.5459	0.0108995	0.0347998	12	103940763	103965708	-	C12orf73	chromosome 12 open reading frame 73 [Source:HGNC Symbol%3BAcc:HGNC:34450]	GO:0034551:mitochondrial respiratory chain complex III assembly;GO:0006457:protein folding;GO:0030433:ER-associated ubiquitin-de... <Preview truncated at 128 characters>	GO:0016021:integral component of membrane;GO:0005743:mitochondrial inner membrane;GO:0005739:mitochondrion;GO:0042470:melanosome... <Preview truncated at 128 characters>	GO:0005524:ATP binding;GO:0051082:unfolded protein binding;	K09487	;ko04141 Protein processing in endoplasmic reticulum;ko04151 PI3K-Akt signaling pathway;ko04657 IL-17 signaling pathway;ko04915 ... <Preview truncated at 128 characters>
ENSG00000235162	999.811	1.78598	0.83672	0.06596	12.6853	7.13826e-37	6.4174e-35	12	105235290	105396097	+	C12orf75	chromosome 12 open reading frame 75 [Source:HGNC Symbol%3BAcc:HGNC:35164]	-	-	-	-	-
ENSG00000174456	152.028	0.784636	-0.349904	0.145415	-2.40624	0.0161175	0.0485307	12	110027028	110073636	-	C12orf76	chromosome 12 open reading frame 76 [Source:HGNC Symbol%3BAcc:HGNC:33790]	-	GO:0005634:nucleus;	GO:0003677:DNA binding;GO:0046872:metal ion binding;	K01368;K09228;K05220	;ko04142 Lysosome;ko04145 Phagosome;ko04210 Apoptosis;ko04612 Antigen processing and presentation;ko05152 Tuberculosis;;ko05168 ... <Preview truncated at 128 characters>
ENSG00000100802	276.32	0.807191	-0.309017	0.110791	-2.7892	0.00528382	0.0186698	14	22985894	23010166	-	C14orf93	chromosome 14 open reading frame 93 [Source:HGNC Symbol%3BAcc:HGNC:20162]	GO:0048856:anatomical structure development;GO:0030154:cell differentiation;GO:0010628:positive regulation of gene expression;	GO:0005576:extracellular region;	GO:0003723:RNA binding;	K02355	-
ENSG00000155330	392.623	1.23546	0.305046	0.0968609	3.14932	0.00163651	0.00669948	16	46796603	46831180	-	C16orf87	chromosome 16 open reading frame 87 [Source:HGNC Symbol%3BAcc:HGNC:33754]	-	-	-	K17985	;ko04137 Mitophagy - animal;ko04140 Autophagy - animal;ko05010 Alzheimer disease;ko05014 Amyotrophic lateral sclerosis;ko05016 H... <Preview truncated at 128 characters>
ENSG00000174109	125.555	1.34575	0.428415	0.160143	2.67521	0.00746829	0.0251337	16	1419752	1420756	-	C16orf91	chromosome 16 open reading frame 91 [Source:HGNC Symbol%3BAcc:HGNC:27558]	-	GO:0016021:integral component of membrane;	-	-	-
ENSG00000186665	203.304	1.29906	0.377464	0.131085	2.87953	0.00398263	0.0145395	17	67991099	67996469	-	C17orf58	chromosome 17 open reading frame 58 [Source:HGNC Symbol%3BAcc:HGNC:27568]	-	-	-	-	-
ENSG00000108666	689.621	1.20802	0.272646	0.0722679	3.77271	0.000161483	0.000836048	17	32324565	32350023	-	C17orf75	chromosome 17 open reading frame 75 [Source:HGNC Symbol%3BAcc:HGNC:30173]	GO:0006886:intracellular protein transport;	GO:0031410:cytoplasmic vesicle;GO:0005802:trans-Golgi network;	-	K17985;K12900	;ko04137 Mitophagy - animal;ko04140 Autophagy - animal;ko05010 Alzheimer disease;ko05014 Amyotrophic lateral sclerosis;ko05016 H... <Preview truncated at 128 characters>
ENSG00000167747	730.415	1.47921	0.564829	0.0778901	7.25161	4.1184e-13	7.45644e-12	19	50797687	50804929	-	C19orf48	chromosome 19 open reading frame 48 [Source:HGNC Symbol%3BAcc:HGNC:29667]	-	-	-	K01368;K14404;K15225	;ko04142 Lysosome;ko04145 Phagosome;ko04210 Apoptosis;ko04612 Antigen processing and presentation;ko05152 Tuberculosis;;ko03015 ... <Preview truncated at 128 characters>
ENSG00000104979	499.153	1.36982	0.453991	0.0851586	5.33112	9.76109e-08	9.04723e-07	19	13774456	13778773	+	C19orf53	chromosome 19 open reading frame 53 [Source:HGNC Symbol%3BAcc:HGNC:24991]	-	-	-	-	-
ENSG00000188493	283.145	0.751249	-0.412638	0.111193	-3.71101	0.000206432	0.00104504	19	40740856	40751553	-	C19orf54	chromosome 19 open reading frame 54 [Source:HGNC Symbol%3BAcc:HGNC:24758]	-	-	-	K17985;K11091	;ko04137 Mitophagy - animal;ko04140 Autophagy - animal;ko05010 Alzheimer disease;ko05014 Amyotrophic lateral sclerosis;ko05016 H... <Preview truncated at 128 characters>
ENSG00000106392	668.362	1.41083	0.496546	0.0753683	6.58827	4.44979e-11	6.34938e-10	7	7156934	7248616	+	C1GALT1	core 1 synthase%2C glycoprotein-N-acetylgalactosamine 3-beta-galactosyltransferase 1 [Source:HGNC Symbol%3BAcc:HGNC:24337]	GO:0001525:angiogenesis;GO:0030154:cell differentiation;GO:0001822:kidney development;GO:0016267:O-glycan processing, core 1;	GO:0000139:Golgi membrane;GO:0016021:integral component of membrane;	GO:0016263:glycoprotein-N-acetylgalactosamine 3-beta-galactosyltransferase activity;GO:0046872:metal ion binding;	K00731	;ko00512 Mucin type O-glycan biosynthesis;ko00514 Other types of O-glycan biosynthesis;ko01100 Metabolic pathways;
ENSG00000116922	393.851	1.41511	0.500918	0.0968263	5.17337	2.29913e-07	2.02018e-06	1	37681570	37692249	-	C1orf109	chromosome 1 open reading frame 109 [Source:HGNC Symbol%3BAcc:HGNC:26039]	-	GO:0005737:cytoplasm;GO:0005829:cytosol;GO:0005730:nucleolus;GO:0005654:nucleoplasm;GO:0005634:nucleus;	-	K09537;K16467	-
ENSG00000197982	125.377	1.67939	0.747941	0.162149	4.61267	3.9753e-06	2.81308e-05	1	37806979	37809454	+	C1orf122	chromosome 1 open reading frame 122 [Source:HGNC Symbol%3BAcc:HGNC:24789]	-	-	-	-	-
ENSG00000119280	617.757	1.23278	0.301916	0.0785031	3.84592	0.000120103	0.00063978	1	230837119	230869589	-	C1orf198	chromosome 1 open reading frame 198 [Source:HGNC Symbol%3BAcc:HGNC:25900]	-	GO:0005829:cytosol;	-	-	-
ENSG00000116667	301.198	0.788039	-0.343661	0.104152	-3.29962	0.000968151	0.00419885	1	184387029	184629019	+	C1orf21	chromosome 1 open reading frame 21 [Source:HGNC Symbol%3BAcc:HGNC:15494]	-	-	-	-	-
ENSG00000239887	193.645	1.32692	0.408085	0.129598	3.14885	0.00163917	0.00670585	1	162378841	162386812	+	C1orf226	chromosome 1 open reading frame 226 [Source:HGNC Symbol%3BAcc:HGNC:34351]	-	-	-	K16513	;ko04713 Circadian entrainment;
ENSG00000108561	4178.98	1.57069	0.6514	0.0503853	12.9284	3.11356e-38	2.929e-36	17	5432777	5448830	-	C1QBP	complement C1q binding protein [Source:HGNC Symbol%3BAcc:HGNC:1243]	GO:0006915:apoptotic process;GO:0006958:complement activation, classical pathway;GO:0006955:immune response;GO:0045087:innate im... <Preview truncated at 128 characters>	GO:0009986:cell surface;GO:0005737:cytoplasm;GO:0005829:cytosol;GO:0005615:extracellular space;GO:0016020:membrane;GO:0005759:mi... <Preview truncated at 128 characters>	GO:0031690:adrenergic receptor binding;GO:0001849:complement component C1q binding;GO:0005540:hyaluronic acid binding;GO:0030984... <Preview truncated at 128 characters>	K15414	-
ENSG00000133466	659.164	0.600501	-0.735762	0.0763774	-9.63324	5.78733e-22	2.16432e-20	22	37180166	37199385	-	C1QTNF6	C1q and TNF related 6 [Source:HGNC Symbol%3BAcc:HGNC:14343]	-	GO:0005581:collagen trimer;GO:0005615:extracellular space;	GO:0042802:identical protein binding;	K19470	-
ENSG00000139178	554.216	0.705601	-0.503076	0.0797709	-6.30652	2.85386e-10	3.72554e-09	12	7089587	7109238	-	C1RL	complement C1r subcomponent like [Source:HGNC Symbol%3BAcc:HGNC:21265]	GO:0006958:complement activation, classical pathway;GO:0045087:innate immune response;GO:0031638:zymogen activation;	GO:0072562:blood microparticle;GO:0070062:extracellular exosome;GO:0005615:extracellular space;	GO:0004252:serine-type endopeptidase activity;GO:0005509:calcium ion binding;	K04613;K18674;K01330	-;ko04145 Phagosome;ko04610 Complement and coagulation cascades;ko05133 Pertussis;ko05150 Staphylococcus aureus infection;ko0517... <Preview truncated at 128 characters>
ENSG00000205885	241.103	0.803804	-0.315085	0.119309	-2.64091	0.00826831	0.0274258	12	7108052	7122524	+	C1RL-AS1	C1RL antisense RNA 1 [Source:HGNC Symbol%3BAcc:HGNC:27461]	-	-	-	-	-
ENSG00000101220	527.953	1.42134	0.507251	0.0860658	5.89376	3.77507e-09	4.29253e-08	20	3753508	3767781	-	C20orf27	chromosome 20 open reading frame 27 [Source:HGNC Symbol%3BAcc:HGNC:15873]	GO:1901224:positive regulation of NIK/NF-kappaB signaling;GO:0030511:positive regulation of transforming growth factor beta rece... <Preview truncated at 128 characters>	-	GO:0008157:protein phosphatase 1 binding;	-	-
ENSG00000154642	530.698	0.827796	-0.272653	0.0986511	-2.76382	0.00571298	0.0199566	21	17788974	17819386	-	C21orf91	chromosome 21 open reading frame 91 [Source:HGNC Symbol%3BAcc:HGNC:16459]	GO:0021895:cerebral cortex neuron differentiation;GO:0060999:positive regulation of dendritic spine development;	-	-	-	-
ENSG00000184208	559.774	0.763044	-0.390161	0.0799104	-4.88248	1.04758e-06	8.15977e-06	22	41688877	41698136	+	C22orf46	chromosome 22 putative open reading frame 46 [Source:HGNC Symbol%3BAcc:HGNC:26294]	-	GO:0005576:extracellular region;	-	K02927	;ko03010 Ribosome;ko04120 Ubiquitin mediated proteolysis;ko04137 Mitophagy - animal;ko05012 Parkinson disease;ko05022 Pathways o... <Preview truncated at 128 characters>
ENSG00000125730	962.601	0.557621	-0.842643	0.0661927	-12.7301	4.02077e-37	3.6507e-35	19	6677704	6730562	-	C3	complement C3 [Source:HGNC Symbol%3BAcc:HGNC:1318]	GO:0097242:beta-amyloid clearance;GO:0006956:complement activation;GO:0006957:complement activation, alternative pathway;GO:0006... <Preview truncated at 128 characters>	GO:0035578:azurophil granule lumen;GO:0072562:blood microparticle;GO:0009986:cell surface;GO:0005788:endoplasmic reticulum lumen... <Preview truncated at 128 characters>	GO:0031715:C5L2 anaphylatoxin chemotactic receptor binding;GO:0004866:endopeptidase inhibitor activity;GO:0005102:receptor bindi... <Preview truncated at 128 characters>	K03990	;ko04080 Neuroactive ligand-receptor interaction;ko04145 Phagosome;ko04610 Complement and coagulation cascades;ko04613 Neutrophi... <Preview truncated at 128 characters>
ENSG00000164096	781.736	0.785343	-0.348605	0.0706274	-4.93584	7.98073e-07	6.36019e-06	4	119296419	119304445	-	C4orf3	chromosome 4 open reading frame 3 [Source:HGNC Symbol%3BAcc:HGNC:19225]	GO:1901895:negative regulation of calcium-transporting ATPase activity;GO:1901877:negative regulation of calcium ion binding;	GO:0005789:endoplasmic reticulum membrane;GO:0016021:integral component of membrane;	-	K07560	-
ENSG00000151470	355.745	0.741384	-0.431708	0.0998301	-4.32443	1.5293e-05	9.75182e-05	4	129093317	129116640	+	C4orf33	chromosome 4 open reading frame 33 [Source:HGNC Symbol%3BAcc:HGNC:27025]	-	-	-	-	-
ENSG00000106804	593.027	0.803522	-0.315591	0.0772435	-4.08566	4.39516e-05	0.000256595	9	120932987	121075195	-	C5	complement C5 [Source:HGNC Symbol%3BAcc:HGNC:1331]	GO:0000187:activation of MAPK activity;GO:0007166:cell surface receptor signaling pathway;GO:0006935:chemotaxis;GO:0006957:compl... <Preview truncated at 128 characters>	GO:0070062:extracellular exosome;GO:0005576:extracellular region;GO:0005615:extracellular space;GO:0005579:membrane attack compl... <Preview truncated at 128 characters>	GO:0008009:chemokine activity;GO:0004866:endopeptidase inhibitor activity;GO:0005102:receptor binding;	K03994	;ko04080 Neuroactive ligand-receptor interaction;ko04610 Complement and coagulation cascades;ko04613 Neutrophil extracellular tr... <Preview truncated at 128 characters>
ENSG00000186493	212.108	0.66058	-0.598195	0.130166	-4.59563	4.3145e-06	3.03577e-05	5	2752131	2755397	+	C5orf38	chromosome 5 open reading frame 38 [Source:HGNC Symbol%3BAcc:HGNC:24226]	-	-	-	-	-
ENSG00000188112	1947.8	0.638533	-0.647166	0.0523602	-12.3599	4.30769e-35	3.55725e-33	6	42092233	42142620	-	C6orf132	chromosome 6 open reading frame 132 [Source:HGNC Symbol%3BAcc:HGNC:21288]	-	-	-	K17985;K12581	;ko04137 Mitophagy - animal;ko04140 Autophagy - animal;ko05010 Alzheimer disease;ko05014 Amyotrophic lateral sclerosis;ko05016 H... <Preview truncated at 128 characters>
ENSG00000197261	286.332	1.38084	0.465544	0.123064	3.78295	0.000154981	0.000807424	6	49550666	49561907	+	C6orf141	chromosome 6 open reading frame 141 [Source:HGNC Symbol%3BAcc:HGNC:21351]	GO:0001835:blastocyst hatching;	GO:0005654:nucleoplasm;	-	K11447	;ko05202 Transcriptional misregulation in cancer;
ENSG00000198663	1440.39	0.796417	-0.328405	0.0535817	-6.12905	8.84075e-10	1.08067e-08	6	36871870	36928964	+	C6orf89	chromosome 6 open reading frame 89 [Source:HGNC Symbol%3BAcc:HGNC:21114]	GO:0050673:epithelial cell proliferation;GO:0045787:positive regulation of cell cycle;GO:1901727:positive regulation of histone ... <Preview truncated at 128 characters>	GO:0005737:cytoplasm;GO:0000139:Golgi membrane;GO:0016021:integral component of membrane;GO:0030496:midbody;GO:0005730:nucleolus... <Preview truncated at 128 characters>	-	K12733;K02927	;ko03040 Spliceosome;;ko03010 Ribosome;ko04120 Ubiquitin mediated proteolysis;ko04137 Mitophagy - animal;ko05012 Parkinson disea... <Preview truncated at 128 characters>
ENSG00000146540	1126.11	1.35307	0.43624	0.0595584	7.32458	2.3964e-13	4.46724e-12	7	996986	1138260	-	C7orf50	chromosome 7 open reading frame 50 [Source:HGNC Symbol%3BAcc:HGNC:22421]	-	-	GO:0003723:RNA binding;	K17985	;ko04137 Mitophagy - animal;ko04140 Autophagy - animal;ko05010 Alzheimer disease;ko05014 Amyotrophic lateral sclerosis;ko05016 H... <Preview truncated at 128 characters>
ENSG00000288596	124.333	0.670033	-0.577697	0.168739	-3.42362	0.000617936	0.00280321	8	66667615	66685564	+	C8orf44	chromosome 8 open reading frame 44 [Source:HGNC Symbol%3BAcc:HGNC:25646]	-	-	-	-	-
ENSG00000135045	217.304	1.23868	0.308804	0.122738	2.51596	0.0118707	0.0374163	9	74946583	74952912	-	C9orf40	chromosome 9 open reading frame 40 [Source:HGNC Symbol%3BAcc:HGNC:23433]	-	-	-	-	-
ENSG00000165118	360.827	1.21948	0.286261	0.0950523	3.01161	0.00259864	0.0100562	9	83938311	83956986	-	C9orf64	chromosome 9 open reading frame 64 [Source:HGNC Symbol%3BAcc:HGNC:28144]	GO:0006400:tRNA modification;	-	-	K09228	;ko05168 Herpes simplex virus 1 infection;
ENSG00000155621	414.121	0.791475	-0.337384	0.0989603	-3.40929	0.000651334	0.00293604	9	71911510	71986054	+	C9orf85	chromosome 9 open reading frame 85 [Source:HGNC Symbol%3BAcc:HGNC:28784]	-	-	-	K17985;K17822;K12581	-;ko03018 RNA degradation;
ENSG00000063180	103.927	0.573677	-0.80169	0.181777	-4.4103	1.03229e-05	6.79873e-05	19	48637946	48646187	-	CA11	carbonic anhydrase 11 [Source:HGNC Symbol%3BAcc:HGNC:1370]	GO:0006730:one-carbon metabolic process;	GO:0016323:basolateral plasma membrane;GO:0005576:extracellular region;	GO:0016836:hydro-lyase activity;GO:0008270:zinc ion binding;	-	-
ENSG00000185015	167.747	0.631987	-0.662033	0.145138	-4.56142	5.08094e-06	3.53112e-05	8	85220587	85284073	+	CA13	carbonic anhydrase 13 [Source:HGNC Symbol%3BAcc:HGNC:14914]	GO:0006730:one-carbon metabolic process;	GO:0005737:cytoplasm;GO:0005829:cytosol;GO:0043231:intracellular membrane-bounded organelle;GO:0043209:myelin sheath;	GO:0004089:carbonate dehydratase activity;GO:0016836:hydro-lyase activity;GO:0008270:zinc ion binding;	K01672	;ko00910 Nitrogen metabolism;ko01100 Metabolic pathways;
ENSG00000104267	5237.37	0.799086	-0.323578	0.0488397	-6.62531	3.46531e-11	4.99541e-10	8	85463968	85481493	+	CA2	carbonic anhydrase 2 [Source:HGNC Symbol%3BAcc:HGNC:1373]	GO:0038166:angiotensin-activated signaling pathway;GO:0015670:carbon dioxide transport;GO:0071498:cellular response to fluid she... <Preview truncated at 128 characters>	GO:0045177:apical part of cell;GO:0030424:axon;GO:0016323:basolateral plasma membrane;GO:0005737:cytoplasm;GO:0005829:cytosol;GO... <Preview truncated at 128 characters>	GO:0004064:arylesterase activity;GO:0004089:carbonate dehydratase activity;GO:0016836:hydro-lyase activity;GO:0008270:zinc ion b... <Preview truncated at 128 characters>	K18245	;ko00910 Nitrogen metabolism;ko01100 Metabolic pathways;ko04964 Proximal tubule bicarbonate reclamation;ko04966 Collecting duct ... <Preview truncated at 128 characters>
ENSG00000253549	101.823	0.477384	-1.06678	0.188864	-5.6484	1.61945e-08	1.68693e-07	8	85440596	85464915	-	CA3-AS1	CA3 antisense RNA 1 [Source:HGNC Symbol%3BAcc:HGNC:51657]	-	-	-	-	-
ENSG00000149679	279.769	0.781832	-0.355069	0.110711	-3.20717	0.00134046	0.00560187	20	62388634	62407285	-	CABLES2	Cdk5 and Abl enzyme substrate 2 [Source:HGNC Symbol%3BAcc:HGNC:16143]	GO:0007049:cell cycle;GO:0051301:cell division;GO:0051726:regulation of cell cycle;	-	-	-	-
ENSG00000067191	101.735	1.36679	0.45079	0.184967	2.43713	0.0148042	0.0451799	17	39173453	39197703	-	CACNB1	calcium voltage-gated channel auxiliary subunit beta 1 [Source:HGNC Symbol%3BAcc:HGNC:1401]	GO:0034765:regulation of ion transmembrane transport;GO:0007268:synaptic transmission;GO:0007528:neuromuscular junction developm... <Preview truncated at 128 characters>	GO:1990454:L-type voltage-gated calcium channel complex;GO:0030315:T-tubule;GO:0005886:plasma membrane;GO:0042383:sarcolemma;GO:... <Preview truncated at 128 characters>	GO:0005245:voltage-gated calcium channel activity;GO:0008331:high voltage-gated calcium channel activity;GO:0005262:calcium chan... <Preview truncated at 128 characters>	K04862	;ko04010 MAPK signaling pathway;ko04260 Cardiac muscle contraction;ko04261 Adrenergic signaling in cardiomyocytes;ko04921 Oxytoc... <Preview truncated at 128 characters>
ENSG00000075461	302.941	0.514467	-0.958848	0.108742	-8.81765	1.16889e-18	3.51436e-17	17	66964707	67033398	+	CACNG4	calcium voltage-gated channel auxiliary subunit gamma 4 [Source:HGNC Symbol%3BAcc:HGNC:1408]	GO:2000969:positive regulation of alpha-amino-3-hydroxy-5-methyl-4-isoxazole propionate selective glutamate receptor activity;GO... <Preview truncated at 128 characters>	GO:0032281:alpha-amino-3-hydroxy-5-methyl-4-isoxazolepropionic acid selective glutamate receptor complex;GO:0044297:cell body;GO... <Preview truncated at 128 characters>	GO:0005246:calcium channel regulator activity;GO:0016247:channel regulator activity;GO:0035255:ionotropic glutamate receptor bin... <Preview truncated at 128 characters>	K04869	;ko04010 MAPK signaling pathway;ko04260 Cardiac muscle contraction;ko04261 Adrenergic signaling in cardiomyocytes;ko04921 Oxytoc... <Preview truncated at 128 characters>
ENSG00000116161	3188.75	1.49008	0.575393	0.0461857	12.4582	1.26118e-35	1.08059e-33	1	174999163	175012027	+	CACYBP	calcyclin binding protein [Source:HGNC Symbol%3BAcc:HGNC:30423]	GO:0007568:aging;GO:0055007:cardiac muscle cell differentiation;GO:0071277:cellular response to calcium ion;GO:0007507:heart dev... <Preview truncated at 128 characters>	GO:0030877:beta-catenin destruction complex;GO:0044297:cell body;GO:0005829:cytosol;GO:0070062:extracellular exosome;GO:0043005:... <Preview truncated at 128 characters>	GO:0019904:protein domain specific binding;GO:0042803:protein homodimerization activity;GO:0044548:S100 protein binding;GO:00156... <Preview truncated at 128 characters>	K04507	;ko04310 Wnt signaling pathway;
ENSG00000084774	1207.77	1.65705	0.728621	0.065527	11.1194	1.00951e-28	5.77544e-27	2	27217369	27243943	+	CAD	carbamoyl-phosphate synthetase 2%2C aspartate transcarbamylase%2C and dihydroorotase [Source:HGNC Symbol%3BAcc:HGNC:1424]	GO:0006207:de novo pyrimidine nucleobase biosynthetic process;GO:0044205:de novo UMP biosynthetic process;GO:0031100:organ r... <Preview truncated at 128 characters>	GO:0042995:cell projection;GO:0005737:cytoplasm;GO:0005829:cytosol;GO:0070062:extracellular exosome;GO:0016020:membrane;GO:00430... <Preview truncated at 128 characters>	GO:0070335:aspartate binding;GO:0004070:aspartate carbamoyltransferase activity;GO:0005524:ATP binding;GO:0004088:carbamoyl-phos... <Preview truncated at 128 characters>	K11540	;ko00240 Pyrimidine metabolism;ko00250 Alanine, aspartate and glutamate metabolism;ko01100 Metabolic pathways;ko01240 Biosynthes... <Preview truncated at 128 characters>
ENSG00000104327	145.207	0.484271	-1.04611	0.158148	-6.61478	3.72112e-11	5.35149e-10	8	90058608	90095475	-	CALB1	calbindin 1 [Source:HGNC Symbol%3BAcc:HGNC:1434]	GO:0071310:cellular response to organic substance;GO:0090102:cochlea development;GO:0007626:locomotory behavior;GO:0007616:long-... <Preview truncated at 128 characters>	GO:0030424:axon;GO:0044305:calyx of Held;GO:0032437:cuticular plate;GO:0005829:cytosol;GO:0030425:dendrite;GO:0043197:dendritic ... <Preview truncated at 128 characters>	GO:0005509:calcium ion binding;GO:0005499:vitamin D binding;GO:0008270:zinc ion binding;GO:0046872:metal ion binding;GO:0003964:... <Preview truncated at 128 characters>	K14757	;ko04961 Endocrine and other factor-regulated calcium reabsorption;
ENSG00000172137	1256.44	4.0108	2.00389	0.0734433	27.2849	6.41628e-164	2.34194e-160	16	71358713	71390436	+	CALB2	calbindin 2 [Source:HGNC Symbol%3BAcc:HGNC:1435]	GO:0051480:cytosolic calcium ion homeostasis;GO:1900271:regulation of long-term synaptic potentiation;	GO:0032437:cuticular plate;GO:0005829:cytosol;GO:0030425:dendrite;GO:0005921:gap junction;GO:0043005:neuron projection;GO:000563... <Preview truncated at 128 characters>	GO:0005509:calcium ion binding;	-	-
ENSG00000012822	473.739	0.578863	-0.788706	0.0906219	-8.70326	3.22479e-18	9.39215e-17	12	53708517	53727745	-	CALCOCO1	calcium binding and coiled-coil domain 1 [Source:HGNC Symbol%3BAcc:HGNC:29306]	GO:0030518:intracellular steroid hormone receptor signaling pathway;GO:0010628:positive regulation of gene expression;GO:0045944... <Preview truncated at 128 characters>	GO:0005829:cytosol;GO:0043231:intracellular membrane-bounded organelle;GO:0005634:nucleus;	GO:0070016:armadillo repeat domain binding;GO:0008013:beta-catenin binding;GO:0046872:metal ion binding;GO:0030374:ligand-depend... <Preview truncated at 128 characters>	K04135	;ko04020 Calcium signaling pathway;ko04022 cGMP-PKG signaling pathway;ko04080 Neuroactive ligand-receptor interaction;ko04152 AM... <Preview truncated at 128 characters>
ENSG00000064989	113.671	0.628482	-0.670056	0.18287	-3.66411	0.000248204	0.00123359	2	187341964	187448460	-	CALCRL	calcitonin receptor like receptor [Source:HGNC Symbol%3BAcc:HGNC:16709]	GO:0007189:adenylate cyclase-activating G-protein coupled receptor signaling pathway;GO:0007188:adenylate cyclase-modulating G-p... <Preview truncated at 128 characters>	GO:1903143:adrenomedullin receptor complex;GO:1990406:CGRP receptor complex;GO:0005737:cytoplasm;GO:0005783:endoplasmic reticulu... <Preview truncated at 128 characters>	GO:1990409:adrenomedullin binding;GO:0001605:adrenomedullin receptor activity;GO:0001635:calcitonin gene-related peptide recepto... <Preview truncated at 128 characters>	K04577;K04613	-
ENSG00000138172	119.064	1.62002	0.696009	0.174058	3.99871	6.36885e-05	0.000359516	10	103446786	103452402	-	CALHM2	calcium homeostasis modulator family member 2 [Source:HGNC Symbol%3BAcc:HGNC:23493]	GO:0043065:positive regulation of apoptotic process;	GO:0005887:integral component of plasma membrane;	GO:0005261:cation channel activity;	K19739	-
ENSG00000198668	8605.75	1.23532	0.304884	0.0406707	7.49639	6.5597e-14	1.29561e-12	14	90396502	90408268	+	CALM1	calmodulin 1 [Source:HGNC Symbol%3BAcc:HGNC:1442]	GO:0007190:activation of adenylate cyclase activity;GO:0016240:autophagosome docking;GO:0005513:detection of calcium ion;GO:0090... <Preview truncated at 128 characters>	GO:0034704:calcium channel complex;GO:1902494:catalytic complex;GO:0005813:centrosome;GO:0005737:cytoplasm;	GO:0010856:adenylate cyclase activator activity;GO:0008179:adenylate cyclase binding;GO:0019855:calcium channel inhibitor activi... <Preview truncated at 128 characters>	K02183	;ko04014 Ras signaling pathway;ko04015 Rap1 signaling pathway;ko04020 Calcium signaling pathway;ko04022 cGMP-PKG signaling pathw... <Preview truncated at 128 characters>
ENSG00000128595	3363.56	1.22517	0.292986	0.0421629	6.94892	3.68088e-12	5.99786e-11	7	128739292	128773400	+	CALU	calumenin [Source:HGNC Symbol%3BAcc:HGNC:1458]	-	GO:0005789:endoplasmic reticulum membrane;GO:0005576:extracellular region;GO:0005794:Golgi apparatus;GO:0042470:melanosome;GO:00... <Preview truncated at 128 characters>	GO:0005509:calcium ion binding;	K04252	-
ENSG00000070808	201.213	0.19015	-2.39479	0.153661	-15.5849	9.22195e-55	1.87001e-52	5	150219491	150290093	-	CAMK2A	calcium/calmodulin dependent protein kinase II alpha [Source:HGNC Symbol%3BAcc:HGNC:1460]	GO:0038166:angiotensin-activated signaling pathway;GO:0006816:calcium ion transport;GO:0048813:dendrite morphogenesis;GO:0060996... <Preview truncated at 128 characters>	GO:0030424:axon;GO:0005954:calcium- and calmodulin-dependent protein kinase complex;GO:0005737:cytoplasm;GO:0005829:cytosol;GO:0... <Preview truncated at 128 characters>	GO:0005524:ATP binding;GO:0009931:calcium-dependent protein serine/threonine kinase activity;GO:0005516:calmodulin binding;GO:00... <Preview truncated at 128 characters>	K04515	;ko04012 ErbB signaling pathway;ko04020 Calcium signaling pathway;ko04024 cAMP signaling pathway;ko04066 HIF-1 signaling pathway... <Preview truncated at 128 characters>
ENSG00000145349	811.092	0.828691	-0.271094	0.0746969	-3.62925	0.000284245	0.00139674	4	113418054	113761927	-	CAMK2D	calcium/calmodulin dependent protein kinase II delta [Source:HGNC Symbol%3BAcc:HGNC:1462]	GO:0010613:positive regulation of cardiac muscle hypertrophy;GO:0006468:protein phosphorylation;GO:0060341:regulation of cellula... <Preview truncated at 128 characters>	GO:0005737:cytoplasm;GO:0043005:neuron projection;GO:0042383:sarcolemma;GO:0033017:sarcoplasmic reticulum membrane;GO:0005954:ca... <Preview truncated at 128 characters>	GO:0005524:ATP binding;GO:0005516:calmodulin binding;GO:0004683:calmodulin-dependent protein kinase activity;GO:0042802:identica... <Preview truncated at 128 characters>	K04515	;ko04012 ErbB signaling pathway;ko04020 Calcium signaling pathway;ko04024 cAMP signaling pathway;ko04066 HIF-1 signaling pathway... <Preview truncated at 128 characters>
ENSG00000148660	1466.74	0.696886	-0.521005	0.0548978	-9.49046	2.30014e-21	8.32887e-20	10	73812501	73874591	-	CAMK2G	calcium/calmodulin dependent protein kinase II gamma [Source:HGNC Symbol%3BAcc:HGNC:1463]	GO:0006816:calcium ion transport;GO:0030154:cell differentiation;GO:0000082:G1/S transition of mitotic cell cycle;GO:0007399:ner... <Preview truncated at 128 characters>	GO:0005954:calcium- and calmodulin-dependent protein kinase complex;GO:0005737:cytoplasm;GO:0043005:neuron projection;GO:0014069... <Preview truncated at 128 characters>	GO:0005524:ATP binding;GO:0005516:calmodulin binding;GO:0004683:calmodulin-dependent protein kinase activity;GO:0042802:identica... <Preview truncated at 128 characters>	K04515	;ko04012 ErbB signaling pathway;ko04020 Calcium signaling pathway;ko04024 cAMP signaling pathway;ko04066 HIF-1 signaling pathway... <Preview truncated at 128 characters>
ENSG00000004660	404.988	1.25998	0.333405	0.09923	3.35992	0.000779661	0.00345779	17	3860315	3894891	-	CAMKK1	calcium/calmodulin dependent protein kinase kinase 1 [Source:HGNC Symbol%3BAcc:HGNC:1469]	GO:0035556:intracellular signal transduction;GO:0045860:positive regulation of protein kinase activity;	GO:0005737:cytoplasm;GO:0005829:cytosol;GO:0005654:nucleoplasm;	GO:0005524:ATP binding;GO:0005516:calmodulin binding;GO:0004683:calmodulin-dependent protein kinase activity;GO:0004674:protein ... <Preview truncated at 128 characters>	K07359	;ko04140 Autophagy - animal;ko04152 AMPK signaling pathway;ko04211 Longevity regulating pathway;ko04920 Adipocytokine signaling ... <Preview truncated at 128 characters>
ENSG00000131236	5660.54	1.27873	0.354717	0.037323	9.50398	2.02016e-21	7.38838e-20	1	40040233	40072649	+	CAP1	cyclase associated actin cytoskeleton regulatory protein 1 [Source:HGNC Symbol%3BAcc:HGNC:20040]	GO:0030036:actin cytoskeleton organization;GO:0007190:activation of adenylate cyclase activity;GO:0001667:ameboidal-type cell mi... <Preview truncated at 128 characters>	GO:0035578:azurophil granule lumen;GO:0030864:cortical actin cytoskeleton;GO:0005737:cytoplasm;GO:0070062:extracellular exosome;... <Preview truncated at 128 characters>	GO:0003779:actin binding;GO:0008179:adenylate cyclase binding;	K17261	-
ENSG00000042493	1296.08	0.815328	-0.294547	0.0587555	-5.01311	5.35586e-07	4.38513e-06	2	85394753	85418432	-	CAPG	capping actin protein%2C gelsolin like [Source:HGNC Symbol%3BAcc:HGNC:1474]	GO:0051014:actin filament severing;GO:0008154:actin polymerization or depolymerization;GO:0051016:barbed-end actin filament capp... <Preview truncated at 128 characters>	GO:0015629:actin cytoskeleton;GO:0005814:centriole;GO:0005737:cytoplasm;GO:0070062:extracellular exosome;GO:0005615:extracellula... <Preview truncated at 128 characters>	GO:0051015:actin filament binding;GO:0045296:cadherin binding;GO:0005546:phosphatidylinositol-4,5-bisphosphate binding;GO:001990... <Preview truncated at 128 characters>	K10368	-
ENSG00000014216	7285.17	0.738367	-0.437591	0.0439155	-9.96438	2.18236e-23	9.13488e-22	11	65180566	65212006	+	CAPN1	calpain 1 [Source:HGNC Symbol%3BAcc:HGNC:1476]	GO:0006508:proteolysis;GO:0050790:regulation of catalytic activity;GO:0097264:self proteolysis;GO:0060056:mammary gland involuti... <Preview truncated at 128 characters>	GO:0005737:cytoplasm;GO:0005829:cytosol;GO:0005886:plasma membrane;GO:0070062:extracellular exosome;GO:0005576:extracellular reg... <Preview truncated at 128 characters>	GO:0005509:calcium ion binding;GO:0004198:calcium-dependent cysteine-type endopeptidase activity;GO:0008233:peptidase activity;	K01367	;ko04141 Protein processing in endoplasmic reticulum;ko04210 Apoptosis;ko04217 Necroptosis;ko04218 Cellular senescence;ko05010 A... <Preview truncated at 128 characters>
ENSG00000254614	151.089	0.766361	-0.383904	0.149409	-2.56948	0.0101851	0.0327886	11	65177606	65181834	-	CAPN1-AS1	CAPN1 antisense RNA 1 [Source:HGNC Symbol%3BAcc:HGNC:56068]	-	-	-	-	-
ENSG00000142330	117.915	1.41954	0.505419	0.172435	2.93106	0.00337807	0.0125867	2	240586734	240617705	+	CAPN10	calpain 10 [Source:HGNC Symbol%3BAcc:HGNC:1477]	GO:0031532:actin cytoskeleton reorganization;GO:0006921:cellular component disassembly involved in execution phase of apoptosis;... <Preview truncated at 128 characters>	GO:0005737:cytoplasm;GO:0005829:cytosol;GO:0005739:mitochondrion;GO:0005886:plasma membrane;GO:0070062:extracellular exosome;GO:... <Preview truncated at 128 characters>	GO:0004198:calcium-dependent cysteine-type endopeptidase activity;GO:0008092:cytoskeletal protein binding;GO:0000149:SNARE bindi... <Preview truncated at 128 characters>	K08579	-
ENSG00000103326	362.332	1.51439	0.598735	0.0976281	6.13281	8.63405e-10	1.05682e-08	16	527712	554636	+	CAPN15	calpain 15 [Source:HGNC Symbol%3BAcc:HGNC:11182]	GO:0006508:proteolysis;	GO:0005737:cytoplasm;	GO:0004198:calcium-dependent cysteine-type endopeptidase activity;GO:0046872:metal ion binding;	K08582	-
ENSG00000203697	438.843	2.67132	1.41755	0.0915136	15.4901	4.0491e-54	8.03218e-52	1	223538007	223665723	-	CAPN8	calpain 8 [Source:HGNC Symbol%3BAcc:HGNC:1485]	GO:1990092:calcium-dependent self proteolysis;GO:0007586:digestion;GO:0006508:proteolysis;	GO:0005737:cytoplasm;GO:0005794:Golgi apparatus;	GO:0005509:calcium ion binding;GO:0004198:calcium-dependent cysteine-type endopeptidase activity;GO:0042802:identical protein bi... <Preview truncated at 128 characters>	K08577;K09228	-;ko05168 Herpes simplex virus 1 infection;
ENSG00000126247	2446.43	0.83928	-0.252776	0.0508896	-4.96714	6.79471e-07	5.47476e-06	19	36139953	36150353	+	CAPNS1	calpain small subunit 1 [Source:HGNC Symbol%3BAcc:HGNC:1481]	GO:0008284:positive regulation of cell proliferation;GO:0016241:regulation of macroautophagy;	GO:0005829:cytosol;GO:0070062:extracellular exosome;GO:0016020:membrane;GO:0005886:plasma membrane;	GO:0005509:calcium ion binding;GO:0004198:calcium-dependent cysteine-type endopeptidase activity;	K08583	;ko05131 Shigellosis;
ENSG00000256812	295.555	0.490545	-1.02754	0.108262	-9.49129	2.28198e-21	8.27955e-20	16	55566684	55567687	+	CAPNS2	calpain small subunit 2 [Source:HGNC Symbol%3BAcc:HGNC:16371]	-	GO:0005829:cytosol;GO:0005886:plasma membrane;	GO:0005509:calcium ion binding;GO:0004198:calcium-dependent cysteine-type endopeptidase activity;	K08584	-
ENSG00000135387	13003.8	1.20562	0.269774	0.0385252	7.00253	2.51381e-12	4.15553e-11	11	34051731	34102610	+	CAPRIN1	cell cycle associated protein 1 [Source:HGNC Symbol%3BAcc:HGNC:6743]	GO:0017148:negative regulation of translation;GO:0050775:positive regulation of dendrite morphogenesis;GO:0061003:positive regul... <Preview truncated at 128 characters>	GO:0031252:cell leading edge;GO:0005737:cytoplasm;GO:0010494:cytoplasmic stress granule;GO:0005829:cytosol;GO:0030425:dendrite;G... <Preview truncated at 128 characters>	GO:0003723:RNA binding;	K18743	-
ENSG00000110888	773.48	1.4226	0.508529	0.0808789	6.28753	3.2255e-10	4.19269e-09	12	30709552	30823302	-	CAPRIN2	caprin family member 2 [Source:HGNC Symbol%3BAcc:HGNC:21259]	GO:0030308:negative regulation of cell growth;GO:0017148:negative regulation of translation;GO:0090263:positive regulation of ca... <Preview truncated at 128 characters>	GO:0005813:centrosome;GO:0005737:cytoplasm;GO:0005829:cytosol;GO:0005739:mitochondrion;GO:0005654:nucleoplasm;GO:0005886:plasma ... <Preview truncated at 128 characters>	GO:0046872:metal ion binding;GO:0003723:RNA binding;GO:0005102:receptor binding;	K18744	-
ENSG00000100065	581.963	1.41495	0.500756	0.0820363	6.10407	1.03398e-09	1.25717e-08	22	37490362	37519542	-	CARD10	caspase recruitment domain family member 10 [Source:HGNC Symbol%3BAcc:HGNC:16422]	GO:0007250:activation of NF-kappaB-inducing kinase activity;GO:0090051:negative regulation of cell migration involved in sprouti... <Preview truncated at 128 characters>	GO:0032449:CBM complex;GO:0005737:cytoplasm;	GO:0050700:CARD domain binding;GO:0030159:receptor signaling complex scaffold activity;	-	-
ENSG00000204397	136.686	0.513083	-0.962736	0.156729	-6.14268	8.11419e-10	9.95187e-09	11	105041326	105101431	-	CARD16	caspase recruitment domain family member 16 [Source:HGNC Symbol%3BAcc:HGNC:33701]	GO:0071456:cellular response to hypoxia;GO:0071222:cellular response to lipopolysaccharide;GO:0071494:cellular response to UV-C;... <Preview truncated at 128 characters>	GO:0097179:protease inhibitor complex;GO:0032991:macromolecular complex;	GO:0050700:CARD domain binding;GO:0089720:caspase binding;GO:0004869:cysteine-type endopeptidase inhibitor activity;GO:0042802:i... <Preview truncated at 128 characters>	K01370	;ko04217 Necroptosis;ko04613 Neutrophil extracellular trap formation;ko04621 NOD-like receptor signaling pathway;ko04623 Cytosol... <Preview truncated at 128 characters>
ENSG00000132357	417.638	0.771471	-0.374315	0.0935564	-4.00096	6.30856e-05	0.000356885	5	40841308	40860175	+	CARD6	caspase recruitment domain family member 6 [Source:HGNC Symbol%3BAcc:HGNC:16394]	GO:0006915:apoptotic process;GO:0042981:regulation of apoptotic process;	-	-	K12797	;ko04621 NOD-like receptor signaling pathway;
ENSG00000105483	258.802	0.733376	-0.447376	0.115573	-3.87094	0.000108417	0.000582971	19	48180770	48255946	-	CARD8	caspase recruitment domain family member 8 [Source:HGNC Symbol%3BAcc:HGNC:17057]	GO:0006919:activation of cysteine-type endopeptidase activity involved in apoptotic process;GO:0051607:defense response to virus... <Preview truncated at 128 characters>	GO:0005737:cytoplasm;GO:0005829:cytosol;GO:0061702:inflammasome complex;GO:0072559:NLRP3 inflammasome complex;GO:0005654:nucleop... <Preview truncated at 128 characters>	GO:0050700:CARD domain binding;GO:0008656:cysteine-type endopeptidase activator activity involved in apoptotic process;GO:000417... <Preview truncated at 128 characters>	K12801;K17985	;ko04621 NOD-like receptor signaling pathway;;ko04137 Mitophagy - animal;ko04140 Autophagy - animal;ko05010 Alzheimer disease;ko... <Preview truncated at 128 characters>
ENSG00000138380	280.655	0.556791	-0.844792	0.117897	-7.16554	7.74823e-13	1.35836e-11	2	202912214	202988263	+	CARF	calcium responsive transcription factor [Source:HGNC Symbol%3BAcc:HGNC:14435]	GO:0071277:cellular response to calcium ion;GO:0035865:cellular response to potassium ion;GO:0061400:positive regulation of tran... <Preview truncated at 128 characters>	GO:0001652:granular component;GO:0005634:nucleus;	GO:0003677:DNA binding;GO:0001228:RNA polymerase II transcription regulatory region sequence-specific DNA binding transcription ... <Preview truncated at 128 characters>	K17985	;ko04137 Mitophagy - animal;ko04140 Autophagy - animal;ko05010 Alzheimer disease;ko05014 Amyotrophic lateral sclerosis;ko05016 H... <Preview truncated at 128 characters>
ENSG00000142453	950.714	1.19307	0.254678	0.0724061	3.51735	0.000435878	0.00205285	19	10871553	10923075	+	CARM1	coactivator associated arginine methyltransferase 1 [Source:HGNC Symbol%3BAcc:HGNC:23393]	GO:0007568:aging;GO:0034971:histone H3-R17 methylation;GO:0034970:histone H3-R2 methylation;GO:0016571:histone methylation;GO:20... <Preview truncated at 128 characters>	GO:0005737:cytoplasm;GO:0005829:cytosol;GO:0005654:nucleoplasm;GO:0005634:nucleus;GO:0032991:macromolecular complex;GO:0090575:R... <Preview truncated at 128 characters>	GO:0008013:beta-catenin binding;GO:0042054:histone methyltransferase activity;GO:0035642:histone methyltransferase activity (H3-... <Preview truncated at 128 characters>	K05931	;ko01522 Endocrine resistance;
ENSG00000156017	940.68	1.25268	0.325022	0.0690289	4.7085	2.49551e-06	1.82318e-05	9	74980790	75028423	-	CARNMT1	carnosine N-methyltransferase 1 [Source:HGNC Symbol%3BAcc:HGNC:23435]	GO:0035498:carnosine metabolic process;GO:0032259:methylation;GO:0006548:histidine catabolic process;	GO:0005829:cytosol;GO:0005634:nucleus;	GO:0030735:carnosine N-methyltransferase activity;GO:0042803:protein homodimerization activity;GO:0008757:S-adenosylmethionine-d... <Preview truncated at 128 characters>	K19787	;ko00340 Histidine metabolism;ko01100 Metabolic pathways;
ENSG00000110619	2130.92	1.5341	0.617397	0.0540162	11.4298	2.96641e-30	1.84768e-28	11	3000922	3057613	-	CARS1	cysteinyl-tRNA synthetase 1 [Source:HGNC Symbol%3BAcc:HGNC:1493]	GO:0006423:cysteinyl-tRNA aminoacylation;	GO:0005737:cytoplasm;GO:0005829:cytosol;	GO:0005524:ATP binding;GO:0004817:cysteine-tRNA ligase activity;GO:0042802:identical protein binding;GO:0046872:metal ion bindin... <Preview truncated at 128 characters>	K01883	;ko00970 Aminoacyl-tRNA biosynthesis;
ENSG00000134905	924.338	1.39904	0.484432	0.0640033	7.56886	3.76509e-14	7.60939e-13	13	110641412	110713603	-	CARS2	cysteinyl-tRNA synthetase 2%2C mitochondrial [Source:HGNC Symbol%3BAcc:HGNC:25695]	GO:0006423:cysteinyl-tRNA aminoacylation;	GO:0005737:cytoplasm;GO:0005759:mitochondrial matrix;	GO:0005524:ATP binding;GO:0004817:cysteine-tRNA ligase activity;GO:0046872:metal ion binding;	K01883;K17985	;ko00970 Aminoacyl-tRNA biosynthesis;;ko04137 Mitophagy - animal;ko04140 Autophagy - animal;ko05010 Alzheimer disease;ko05014 Am... <Preview truncated at 128 characters>
ENSG00000147044	2418.62	0.835458	-0.25936	0.0484682	-5.35114	8.74001e-08	8.14633e-07	X	41514934	41923554	-	CASK	calcium/calmodulin dependent serine protein kinase [Source:HGNC Symbol%3BAcc:HGNC:1497]	GO:0070509:calcium ion import;GO:0021987:cerebral cortex development;GO:0001953:negative regulation of cell-matrix adhesion;GO:0... <Preview truncated at 128 characters>	GO:0097440:apical dendrite;GO:0005604:basement membrane;GO:0016323:basolateral plasma membrane;GO:0005911:cell-cell junction;GO:... <Preview truncated at 128 characters>	GO:0005524:ATP binding;GO:0005516:calmodulin binding;GO:0042043:neurexin family protein binding;GO:0030165:PDZ domain binding;GO... <Preview truncated at 128 characters>	K06103	-
ENSG00000177303	282.689	0.81885	-0.28833	0.117712	-2.44944	0.0143078	0.0439	17	75500261	75515537	-	CASKIN2	CASK interacting protein 2 [Source:HGNC Symbol%3BAcc:HGNC:18200]	-	GO:0005737:cytoplasm;GO:0016020:membrane;	-	-	-
ENSG00000137752	656.934	0.441351	-1.18	0.0909965	-12.9676	1.86881e-38	1.79504e-36	11	105025397	105035250	-	CASP1	caspase 1 [Source:HGNC Symbol%3BAcc:HGNC:1499]	GO:0006915:apoptotic process;GO:0071346:cellular response to interferon-gamma;GO:0071222:cellular response to lipopolysaccharide... <Preview truncated at 128 characters>	GO:0097169:AIM2 inflammasome complex;GO:0005737:cytoplasm;GO:0005829:cytosol;GO:0005576:extracellular region;GO:0072557:IPAF inf... <Preview truncated at 128 characters>	GO:0050700:CARD domain binding;GO:0008656:cysteine-type endopeptidase activator activity involved in apoptotic process;GO:000419... <Preview truncated at 128 characters>	K01370	;ko04217 Necroptosis;ko04613 Neutrophil extracellular trap formation;ko04621 NOD-like receptor signaling pathway;ko04623 Cytosol... <Preview truncated at 128 characters>
ENSG00000003400	149.183	0.719052	-0.475832	0.150223	-3.16751	0.00153749	0.00632578	2	201182872	201229428	+	CASP10	caspase 10 [Source:HGNC Symbol%3BAcc:HGNC:1500]	GO:0006919:activation of cysteine-type endopeptidase activity involved in apoptotic process;GO:0006915:apoptotic process;GO:0043... <Preview truncated at 128 characters>	GO:0031265:CD95 death-inducing signaling complex;GO:0005737:cytoplasm;GO:0005829:cytosol;GO:0097342:ripoptosome;	GO:0004197:cysteine-type endopeptidase activity;GO:0097153:cysteine-type endopeptidase activity involved in apoptotic process;GO... <Preview truncated at 128 characters>	K04400	;ko04210 Apoptosis;ko04622 RIG-I-like receptor signaling pathway;ko04668 TNF signaling pathway;ko05152 Tuberculosis;ko05161 Hepa... <Preview truncated at 128 characters>
ENSG00000196954	2147.57	0.706902	-0.500419	0.0498313	-10.0423	9.93761e-24	4.22754e-22	11	104942866	104969366	-	CASP4	caspase 4 [Source:HGNC Symbol%3BAcc:HGNC:1505]	GO:0006915:apoptotic process;GO:0097194:execution phase of apoptosis;GO:0006954:inflammatory response;GO:0045087:innate immune r... <Preview truncated at 128 characters>	GO:0097169:AIM2 inflammasome complex;GO:0005737:cytoplasm;GO:0005829:cytosol;GO:0005783:endoplasmic reticulum;GO:0005789:endopla... <Preview truncated at 128 characters>	GO:0050700:CARD domain binding;GO:0004197:cysteine-type endopeptidase activity;GO:0097199:cysteine-type endopeptidase activity i... <Preview truncated at 128 characters>	K04394	;ko04613 Neutrophil extracellular trap formation;ko04621 NOD-like receptor signaling pathway;ko05130 Pathogenic Escherichia coli... <Preview truncated at 128 characters>
ENSG00000165806	656.534	0.812712	-0.299185	0.0810799	-3.69	0.000224255	0.00112652	10	113679162	113730907	+	CASP7	caspase 7 [Source:HGNC Symbol%3BAcc:HGNC:1508]	GO:0007568:aging;GO:0006915:apoptotic process;GO:0072734:cellular response to staurosporine;GO:0097194:execution phase of apopto... <Preview truncated at 128 characters>	GO:0005737:cytoplasm;GO:0005829:cytosol;GO:0005654:nucleoplasm;GO:0005634:nucleus;	GO:0004190:aspartic-type endopeptidase activity;GO:0004197:cysteine-type endopeptidase activity;GO:0097153:cysteine-type endopep... <Preview truncated at 128 characters>	K04397	;ko04210 Apoptosis;ko04214 Apoptosis - fly;ko04215 Apoptosis - multiple species;ko04668 TNF signaling pathway;ko04932 Non-alcoho... <Preview truncated at 128 characters>
ENSG00000118412	1351.77	1.23929	0.309515	0.0603244	5.13084	2.8845e-07	2.49135e-06	6	89829894	89874436	+	CASP8AP2	caspase 8 associated protein 2 [Source:HGNC Symbol%3BAcc:HGNC:1510]	GO:0006919:activation of cysteine-type endopeptidase activity involved in apoptotic process;GO:0097190:apoptotic signaling pathw... <Preview truncated at 128 characters>	GO:0005737:cytoplasm;GO:0005739:mitochondrion;GO:0005654:nucleoplasm;GO:0005634:nucleus;GO:0016605:PML body;	GO:0008656:cysteine-type endopeptidase activator activity involved in apoptotic process;GO:0005123:death receptor binding;GO:001... <Preview truncated at 128 characters>	K14572	;ko03008 Ribosome biogenesis in eukaryotes;
ENSG00000274070	109.282	0.56557	-0.822223	0.172849	-4.75688	1.9661e-06	1.46754e-05	7	74964705	75031528	+	CASTOR2	cytosolic arginine sensor for mTORC1 subunit 2 [Source:HGNC Symbol%3BAcc:HGNC:37073]	GO:1903577:cellular response to L-arginine;GO:1904262:negative regulation of TORC1 signaling;GO:1902531:regulation of intracellu... <Preview truncated at 128 characters>	GO:0005829:cytosol;	GO:0042802:identical protein binding;	K17985	;ko04137 Mitophagy - animal;ko04140 Autophagy - animal;ko05010 Alzheimer disease;ko05014 Amyotrophic lateral sclerosis;ko05016 H... <Preview truncated at 128 characters>
ENSG00000239521	232.726	0.36568	-1.45135	0.123992	-11.7052	1.19881e-31	8.01729e-30	7	100200653	100272218	-	CASTOR3	CASTOR family member 3 [Source:HGNC Symbol%3BAcc:HGNC:29954]	GO:1903577:cellular response to L-arginine;GO:1904262:negative regulation of TORC1 signaling;GO:1902531:regulation of intracellu... <Preview truncated at 128 characters>	GO:0005829:cytosol;GO:0000785:chromatin;GO:0000775:chromosome, centromeric region;GO:0008278:cohesin complex;GO:0005615:extracel... <Preview truncated at 128 characters>	GO:0003682:chromatin binding;	K13055;K11447;K09228	;ko04114 Oocyte meiosis;;ko05202 Transcriptional misregulation in cancer;;ko05168 Herpes simplex virus 1 infection;
ENSG00000130940	278.011	0.670128	-0.577492	0.112006	-5.1559	2.52412e-07	2.20408e-06	1	10636604	10796650	-	CASZ1	castor zinc finger 1 [Source:HGNC Symbol%3BAcc:HGNC:26002]	GO:0045944:positive regulation of transcription from RNA polymerase II promoter;GO:0045893:positive regulation of transcription,... <Preview truncated at 128 characters>	GO:0000785:chromatin;GO:0005829:cytosol;GO:0043231:intracellular membrane-bounded organelle;GO:0005654:nucleoplasm;GO:0005634:nu... <Preview truncated at 128 characters>	GO:0001228:RNA polymerase II transcription regulatory region sequence-specific DNA binding transcription factor activity involve... <Preview truncated at 128 characters>	K12756	;ko04510 Focal adhesion;ko04670 Leukocyte transendothelial migration;ko04810 Regulation of actin cytoskeleton;ko05131 Shigellosi... <Preview truncated at 128 characters>
ENSG00000121691	2604.9	0.830175	-0.268513	0.0519227	-5.1714	2.3235e-07	2.03963e-06	11	34438934	34472060	+	CAT	catalase [Source:HGNC Symbol%3BAcc:HGNC:1516]	GO:0009060:aerobic respiration;GO:0007568:aging;GO:0071363:cellular response to growth factor stimulus;GO:0008203:cholesterol me... <Preview truncated at 128 characters>	GO:0005737:cytoplasm;GO:0005829:cytosol;GO:0005783:endoplasmic reticulum;GO:0070062:extracellular exosome;GO:0005576:extracellul... <Preview truncated at 128 characters>	GO:0004046:aminoacylase activity;GO:0016209:antioxidant activity;GO:0004096:catalase activity;GO:0019899:enzyme binding;GO:00200... <Preview truncated at 128 characters>	K03781	;ko00380 Tryptophan metabolism;ko00630 Glyoxylate and dicarboxylate metabolism;ko01100 Metabolic pathways;ko01200 Carbon metabol... <Preview truncated at 128 characters>
ENSG00000168497	167.67	0.573828	-0.801309	0.139829	-5.73064	1.00052e-08	1.07346e-07	2	191834310	191847088	-	CAVIN2	caveolae associated protein 2 [Source:HGNC Symbol%3BAcc:HGNC:10690]	GO:0097320:membrane tubulation;	GO:0005901:caveola;GO:0005737:cytoplasm;GO:0005829:cytosol;GO:0045121:membrane raft;GO:0005654:nucleoplasm;GO:0005886:plasma mem... <Preview truncated at 128 characters>	GO:0001786:phosphatidylserine binding;GO:0005543:phospholipid binding;GO:0005080:protein kinase C binding;	K19387	-
ENSG00000078699	664.847	0.724065	-0.465809	0.0721795	-6.45348	1.09314e-10	1.49143e-09	20	33490075	33650036	+	CBFA2T2	CBFA2/RUNX1 partner transcriptional co-repressor 2 [Source:HGNC Symbol%3BAcc:HGNC:1536]	GO:0060575:intestinal epithelial cell differentiation;GO:0010977:negative regulation of neuron projection development;GO:0045746... <Preview truncated at 128 characters>	GO:0005634:nucleus;	GO:0046872:metal ion binding;GO:0003714:transcription corepressor activity;	K12581;K17985	;ko03018 RNA degradation;;ko04137 Mitophagy - animal;ko04140 Autophagy - animal;ko05010 Alzheimer disease;ko05014 Amyotrophic la... <Preview truncated at 128 characters>
ENSG00000114423	437.355	0.704072	-0.506205	0.0907091	-5.58053	2.3979e-08	2.44206e-07	3	105655461	105869552	-	CBLB	Cbl proto-oncogene B [Source:HGNC Symbol%3BAcc:HGNC:1542]	GO:0006955:immune response;GO:0035556:intracellular signal transduction;GO:0046642:negative regulation of alpha-beta T cell prol... <Preview truncated at 128 characters>	GO:0005829:cytosol;GO:0045121:membrane raft;GO:0005654:nucleoplasm;GO:0005886:plasma membrane;GO:0005737:cytoplasm;	GO:0005509:calcium ion binding;GO:0001784:phosphotyrosine binding;GO:0030971:receptor tyrosine kinase binding;GO:0017124:SH3 dom... <Preview truncated at 128 characters>	K04707	;ko04012 ErbB signaling pathway;ko04120 Ubiquitin mediated proteolysis;ko04144 Endocytosis;ko04910 Insulin signaling pathway;ko0... <Preview truncated at 128 characters>
ENSG00000142273	236.012	1.37528	0.459727	0.131071	3.50746	0.000452399	0.00212299	19	44777869	44800652	+	CBLC	Cbl proto-oncogene C [Source:HGNC Symbol%3BAcc:HGNC:15961]	GO:0007166:cell surface receptor signaling pathway;GO:0042059:negative regulation of epidermal growth factor receptor signaling ... <Preview truncated at 128 characters>	GO:0045121:membrane raft;GO:0005886:plasma membrane;	GO:0005509:calcium ion binding;GO:0005154:epidermal growth factor receptor binding;GO:0001784:phosphotyrosine binding;GO:0030971... <Preview truncated at 128 characters>	K04707	;ko04012 ErbB signaling pathway;ko04120 Ubiquitin mediated proteolysis;ko04144 Endocytosis;ko04910 Insulin signaling pathway;ko0... <Preview truncated at 128 characters>
ENSG00000159228	850.706	1.23108	0.299926	0.065419	4.58469	4.54663e-06	3.18893e-05	21	36069941	36073166	+	CBR1	carbonyl reductase 1 [Source:HGNC Symbol%3BAcc:HGNC:1548]	GO:0019371:cyclooxygenase pathway;GO:0017144:drug metabolic process;GO:0030855:epithelial cell differentiation;GO:2000379:positi... <Preview truncated at 128 characters>	GO:0005829:cytosol;GO:0070062:extracellular exosome;GO:1903561:extracellular vesicle;	GO:0047021:15-hydroxyprostaglandin dehydrogenase (NADP+) activity;GO:0047020:15-hydroxyprostaglandin-D dehydrogenase (NADP+) act... <Preview truncated at 128 characters>	K00079	;ko00590 Arachidonic acid metabolism;ko00790 Folate biosynthesis;ko00980 Metabolism of xenobiotics by cytochrome P450;ko01100 Me... <Preview truncated at 128 characters>
ENSG00000173894	140.022	1.6286	0.703628	0.156548	4.49464	6.96866e-06	4.71903e-05	17	79778148	79787983	+	CBX2	chromobox 2 [Source:HGNC Symbol%3BAcc:HGNC:1552]	GO:0030154:cell differentiation;GO:0006325:chromatin organization;GO:0045137:development of primary sexual characteristics;GO:00... <Preview truncated at 128 characters>	GO:0000791:euchromatin;GO:0000792:heterochromatin;GO:0005654:nucleoplasm;GO:0005634:nucleus;GO:0031519:PcG protein complex;GO:00... <Preview truncated at 128 characters>	GO:0003682:chromatin binding;GO:0003677:DNA binding;GO:0035064:methylated histone binding;	K11451	-
ENSG00000122565	9648.53	1.29064	0.368083	0.0446691	8.2402	1.71928e-16	4.28645e-15	7	26201162	26213607	+	CBX3	chromobox 3 [Source:HGNC Symbol%3BAcc:HGNC:1553]	GO:0006974:cellular response to DNA damage stimulus;GO:0006338:chromatin remodeling;GO:0045892:negative regulation of transcript... <Preview truncated at 128 characters>	GO:0000785:chromatin;GO:0000775:chromosome, centromeric region;GO:0000781:chromosome, telomeric region;GO:0000779:condensed chro... <Preview truncated at 128 characters>	GO:0019899:enzyme binding;GO:1990226:histone methyltransferase binding;GO:0042802:identical protein binding;GO:0019904:protein d... <Preview truncated at 128 characters>	K11586	;ko05131 Shigellosis;
ENSG00000094916	6404.2	0.756442	-0.402698	0.0392134	-10.2694	9.68172e-25	4.36275e-23	12	54230942	54280133	-	CBX5	chromobox 5 [Source:HGNC Symbol%3BAcc:HGNC:1555]	GO:0006974:cellular response to DNA damage stimulus;GO:0045892:negative regulation of transcription, DNA-templated;GO:0000122:ne... <Preview truncated at 128 characters>	GO:0000785:chromatin;GO:0010369:chromocenter;GO:0000775:chromosome, centromeric region;GO:0000781:chromosome, telomeric region;G... <Preview truncated at 128 characters>	GO:0003682:chromatin binding;GO:0019899:enzyme binding;GO:1990226:histone methyltransferase binding;GO:0042802:identical protein... <Preview truncated at 128 characters>	K11587;K12581	-;ko03018 RNA degradation;
ENSG00000164221	290.583	1.41515	0.500952	0.110978	4.51397	6.36244e-06	4.34235e-05	5	115267190	115296693	-	CCDC112	coiled-coil domain containing 112 [Source:HGNC Symbol%3BAcc:HGNC:28599]	-	-	-	-	-
ENSG00000136710	675.166	0.777991	-0.362174	0.0847925	-4.2713	1.94338e-05	0.000121254	2	130337933	130342699	-	CCDC115	coiled-coil domain containing 115 [Source:HGNC Symbol%3BAcc:HGNC:28178]	GO:0006879:cellular iron ion homeostasis;GO:0036295:cellular response to increased oxygen levels;GO:0007042:lysosomal lumen acid... <Preview truncated at 128 characters>	GO:0030137:COPI-coated vesicle;GO:0005783:endoplasmic reticulum;GO:0005793:endoplasmic reticulum-Golgi intermediate compartment;... <Preview truncated at 128 characters>	GO:0051082:unfolded protein binding;	K14561	;ko03008 Ribosome biogenesis in eukaryotes;
ENSG00000007080	585.549	1.36564	0.449576	0.078395	5.73476	9.76509e-09	1.0514e-07	19	17933015	17943991	+	CCDC124	coiled-coil domain containing 124 [Source:HGNC Symbol%3BAcc:HGNC:25171]	GO:0007049:cell cycle;GO:0051301:cell division;	GO:0005829:cytosol;GO:0005815:microtubule organizing center;GO:0030496:midbody;GO:0005886:plasma membrane;	-	K01081;K12581	;ko00230 Purine metabolism;ko00240 Pyrimidine metabolism;ko00760 Nicotinate and nicotinamide metabolism;ko01100 Metabolic pathwa... <Preview truncated at 128 characters>
ENSG00000185298	633.086	1.34485	0.427448	0.0736301	5.80534	6.42348e-09	7.08329e-08	17	81666737	81673904	+	CCDC137	coiled-coil domain containing 137 [Source:HGNC Symbol%3BAcc:HGNC:33451]	-	GO:0005694:chromosome;GO:0001650:fibrillar center;GO:0005730:nucleolus;	GO:0003723:RNA binding;	K09228	;ko05168 Herpes simplex virus 1 infection;
ENSG00000163006	459.251	1.28321	0.359755	0.0911735	3.94583	7.9523e-05	0.000441081	2	108786757	108885477	+	CCDC138	coiled-coil domain containing 138 [Source:HGNC Symbol%3BAcc:HGNC:26531]	-	-	-	-	-
ENSG00000144395	234.812	0.749828	-0.415369	0.119095	-3.48771	0.000487169	0.00226576	2	196639554	196763490	+	CCDC150	coiled-coil domain containing 150 [Source:HGNC Symbol%3BAcc:HGNC:26834]	-	-	-	K17985	;ko04137 Mitophagy - animal;ko04140 Autophagy - animal;ko05010 Alzheimer disease;ko05014 Amyotrophic lateral sclerosis;ko05016 H... <Preview truncated at 128 characters>
ENSG00000154781	319.316	0.802034	-0.318265	0.101295	-3.14196	0.00167821	0.00684258	3	14651762	14672659	+	CCDC174	coiled-coil domain containing 174 [Source:HGNC Symbol%3BAcc:HGNC:28033]	-	GO:0005654:nucleoplasm;GO:0005634:nucleus;	-	-	-
ENSG00000223745	487.479	0.749955	-0.415124	0.0886749	-4.68141	2.84902e-06	2.06246e-05	1	93262186	93346025	-	CCDC18-AS1	CCDC18 antisense RNA 1 [Source:HGNC Symbol%3BAcc:HGNC:52262]	-	-	-	-	-
ENSG00000165813	1044.78	0.732865	-0.44838	0.0631636	-7.09871	1.25928e-12	2.15388e-11	10	114120862	114174232	-	CCDC186	coiled-coil domain containing 186 [Source:HGNC Symbol%3BAcc:HGNC:24349]	GO:0035773:insulin secretion involved in cellular response to glucose stimulus;GO:0009617:response to bacterium;GO:0042593:gluco... <Preview truncated at 128 characters>	GO:0005802:trans-Golgi network;GO:0005794:Golgi apparatus;	GO:0031267:small GTPase binding;	K12581	;ko03018 RNA degradation;
ENSG00000163617	313.346	0.661653	-0.595853	0.109482	-5.4425	5.25381e-08	5.06508e-07	3	113964137	114056594	-	CCDC191	coiled-coil domain containing 191 [Source:HGNC Symbol%3BAcc:HGNC:29272]	-	-	-	-	-
ENSG00000024862	444.291	0.794059	-0.332682	0.0898648	-3.70203	0.00021388	0.00107916	6	138773769	138793319	+	CCDC28A	coiled-coil domain containing 28A [Source:HGNC Symbol%3BAcc:HGNC:21098]	-	-	-	-	-
ENSG00000091986	1646.91	0.135059	-2.88834	0.134995	-21.3959	1.45969e-101	1.56701e-98	3	112596797	112649530	-	CCDC80	coiled-coil domain containing 80 [Source:HGNC Symbol%3BAcc:HGNC:30649]	GO:0030198:extracellular matrix organization;GO:0010811:positive regulation of cell-substrate adhesion;GO:0009617:response to ba... <Preview truncated at 128 characters>	GO:0005604:basement membrane;GO:0005576:extracellular region;GO:0005614:interstitial matrix;	GO:0001968:fibronectin binding;GO:0008201:heparin binding;	K12581	;ko03018 RNA degradation;
ENSG00000149231	2071.13	0.713506	-0.487003	0.0524363	-9.28752	1.57931e-20	5.47955e-19	11	96349241	96389956	-	CCDC82	coiled-coil domain containing 82 [Source:HGNC Symbol%3BAcc:HGNC:26282]	-	GO:0005634:nucleus;	GO:0003677:DNA binding;GO:0046872:metal ion binding;	K09228;K02927	;ko05168 Herpes simplex virus 1 infection;;ko03010 Ribosome;ko04120 Ubiquitin mediated proteolysis;ko04137 Mitophagy - animal;ko... <Preview truncated at 128 characters>
ENSG00000175602	193.292	1.62574	0.701099	0.262725	2.66857	0.00761752	0.0255786	11	65890673	65891635	+	CCDC85B	coiled-coil domain containing 85B [Source:HGNC Symbol%3BAcc:HGNC:24926]	GO:0030154:cell differentiation;GO:0030308:negative regulation of cell growth;GO:0045599:negative regulation of fat cell differe... <Preview truncated at 128 characters>	GO:0005912:adherens junction;GO:0005813:centrosome;GO:0005737:cytoplasm;GO:0005634:nucleus;	GO:0070097:delta-catenin binding;	K16758	-
ENSG00000110104	579.412	1.87606	0.907703	0.0819062	11.0822	1.53016e-28	8.67247e-27	11	60842113	60851081	+	CCDC86	coiled-coil domain containing 86 [Source:HGNC Symbol%3BAcc:HGNC:28359]	-	GO:0005694:chromosome;GO:0005730:nucleolus;GO:0005654:nucleoplasm;GO:0005634:nucleus;	GO:0003723:RNA binding;	K14822	-
ENSG00000115355	1214.53	1.20983	0.274805	0.0588226	4.67176	2.98628e-06	2.15584e-05	2	55287842	55419895	-	CCDC88A	coiled-coil domain containing 88A [Source:HGNC Symbol%3BAcc:HGNC:25523]	GO:0032147:activation of protein kinase activity;GO:0032148:activation of protein kinase B activity;GO:0016477:cell migration;GO... <Preview truncated at 128 characters>	GO:0005814:centriole;GO:0005813:centrosome;GO:0036064:ciliary basal body;GO:0030142:Golgi to ER transport vesicle;GO:0005737:cyt... <Preview truncated at 128 characters>	GO:0003779:actin binding;GO:0051959:dynein light intermediate chain binding;GO:0005154:epidermal growth factor receptor binding;... <Preview truncated at 128 characters>	K09228;K15696;K12581;K17985;K11447;K04613;K16470	-
ENSG00000123106	938.985	1.26524	0.339417	0.0716569	4.73669	2.17237e-06	1.61031e-05	12	28133249	28581511	+	CCDC91	coiled-coil domain containing 91 [Source:HGNC Symbol%3BAcc:HGNC:24855]	GO:0090160:Golgi to lysosome transport;GO:0015031:protein transport;	GO:0005829:cytosol;GO:0005794:Golgi apparatus;GO:0016020:membrane;GO:0005654:nucleoplasm;GO:0005802:trans-Golgi network;	-	K05069;K11667	-
ENSG00000119242	166.579	0.710742	-0.492603	0.144762	-3.40285	0.000666859	0.00299611	12	123918660	123972831	-	CCDC92	coiled-coil domain containing 92 [Source:HGNC Symbol%3BAcc:HGNC:29563]	GO:0007018:microtubule-based movement;	GO:0005814:centriole;GO:0005813:centrosome;GO:0005737:cytoplasm;GO:0043231:intracellular membrane-bounded organelle;GO:0005654:n... <Preview truncated at 128 characters>	GO:0042802:identical protein binding;GO:0005524:ATP binding;GO:0008569:ATP-dependent microtubule motor activity, minus-end-direc... <Preview truncated at 128 characters>	K16452;K10408	-;ko05014 Amyotrophic lateral sclerosis;ko05016 Huntington disease;ko05022 Pathways of neurodegeneration - multiple diseases;
ENSG00000142039	278.3	0.795412	-0.330225	0.119401	-2.76567	0.00568053	0.0198715	19	41310172	41324873	+	CCDC97	coiled-coil domain containing 97 [Source:HGNC Symbol%3BAcc:HGNC:28289]	-	-	-	-	-
ENSG00000188549	2005.39	1.4095	0.495185	0.064121	7.72267	1.13921e-14	2.39248e-13	15	40331452	40340939	-	CCDC9B	coiled-coil domain containing 9B [Source:HGNC Symbol%3BAcc:HGNC:33488]	-	-	GO:0003723:RNA binding;	K09228	;ko05168 Herpes simplex virus 1 infection;
ENSG00000142871	390.49	1.48489	0.570355	0.0920903	6.19343	5.8869e-10	7.37378e-09	1	85580761	85584589	+	CCN1	cellular communication network factor 1 [Source:HGNC Symbol%3BAcc:HGNC:2654]	GO:0003278:apoptotic process involved in heart morphogenesis;GO:0060413:atrial septum morphogenesis;GO:0003181:atrioventricular ... <Preview truncated at 128 characters>	GO:0005788:endoplasmic reticulum lumen;GO:0031012:extracellular matrix;GO:0005576:extracellular region;	GO:0050840:extracellular matrix binding;GO:0008201:heparin binding;GO:0005520:insulin-like growth factor binding;GO:0005178:inte... <Preview truncated at 128 characters>	K06829	-
ENSG00000112576	262.915	1.44338	0.529456	0.119284	4.43861	9.05406e-06	6.01298e-05	6	41934934	42050357	-	CCND3	cyclin D3 [Source:HGNC Symbol%3BAcc:HGNC:1585]	GO:0051301:cell division;GO:0044772:mitotic cell cycle phase transition;GO:0000122:negative regulation of transcription from RNA... <Preview truncated at 128 characters>	GO:0000307:cyclin-dependent protein kinase holoenzyme complex;GO:0005737:cytoplasm;GO:0016020:membrane;GO:0005654:nucleoplasm;GO... <Preview truncated at 128 characters>	GO:0004693:cyclin-dependent protein serine/threonine kinase activity;GO:0016538:cyclin-dependent protein serine/threonine kinase... <Preview truncated at 128 characters>	K10152	;ko04110 Cell cycle;ko04115 p53 signaling pathway;ko04151 PI3K-Akt signaling pathway;ko04218 Cellular senescence;ko04310 Wnt sig... <Preview truncated at 128 characters>
ENSG00000166946	926.201	0.795361	-0.330318	0.067892	-4.86534	1.1426e-06	8.83577e-06	15	43185118	43197177	+	CCNDBP1	cyclin D1 binding protein 1 [Source:HGNC Symbol%3BAcc:HGNC:1587]	GO:0007049:cell cycle;GO:0051726:regulation of cell cycle;	GO:0005737:cytoplasm;GO:0016604:nuclear body;GO:0005654:nucleoplasm;GO:0005634:nucleus;	-	K17985;K02927	;ko04137 Mitophagy - animal;ko04140 Autophagy - animal;ko05010 Alzheimer disease;ko05014 Amyotrophic lateral sclerosis;ko05016 H... <Preview truncated at 128 characters>
ENSG00000138764	1030.54	0.53711	-0.896709	0.0645785	-13.8856	7.74835e-44	9.75223e-42	4	77157207	77433388	+	CCNG2	cyclin G2 [Source:HGNC Symbol%3BAcc:HGNC:1593]	GO:0051301:cell division;GO:0044772:mitotic cell cycle phase transition;GO:0000079:regulation of cyclin-dependent protein serine... <Preview truncated at 128 characters>	GO:0000307:cyclin-dependent protein kinase holoenzyme complex;GO:0005737:cytoplasm;GO:0005634:nucleus;	GO:0016538:cyclin-dependent protein serine/threonine kinase regulator activity;	K10146	;ko04068 FoxO signaling pathway;ko04115 p53 signaling pathway;
ENSG00000134480	741.055	1.28704	0.364054	0.0686916	5.29984	1.15906e-07	1.0587e-06	5	87318416	87412930	-	CCNH	cyclin H [Source:HGNC Symbol%3BAcc:HGNC:1594]	GO:0007049:cell cycle;GO:0070816:phosphorylation of RNA polymerase II C-terminal domain;GO:0050821:protein stabilization;GO:0000... <Preview truncated at 128 characters>	GO:0070516:CAK-ERCC2 complex;GO:0019907:cyclin-dependent protein kinase activating kinase holoenzyme complex;GO:0005654:nucleopl... <Preview truncated at 128 characters>	GO:0016538:cyclin-dependent protein serine/threonine kinase regulator activity;GO:0005096:GTPase activator activity;GO:0051020:G... <Preview truncated at 128 characters>	K06634;K04352	;ko03022 Basal transcription factors;ko03420 Nucleotide excision repair;ko04110 Cell cycle;;ko04010 MAPK signaling pathway;ko040... <Preview truncated at 128 characters>
ENSG00000107443	210.525	1.25578	0.328588	0.128075	2.5656	0.0102999	0.0330997	10	96043394	96060870	+	CCNJ	cyclin J [Source:HGNC Symbol%3BAcc:HGNC:23434]	GO:0044772:mitotic cell cycle phase transition;GO:0000079:regulation of cyclin-dependent protein serine/threonine kinase activit... <Preview truncated at 128 characters>	GO:0005813:centrosome;GO:0000307:cyclin-dependent protein kinase holoenzyme complex;GO:0005737:cytoplasm;GO:0005634:nucleus;	GO:0016538:cyclin-dependent protein serine/threonine kinase regulator activity;	-	-
ENSG00000135083	216.426	1.28537	0.362181	0.12847	2.81918	0.00481465	0.0171859	5	160249083	160345396	-	CCNJL	cyclin J like [Source:HGNC Symbol%3BAcc:HGNC:25876]	GO:0044772:mitotic cell cycle phase transition;GO:0000079:regulation of cyclin-dependent protein serine/threonine kinase activit... <Preview truncated at 128 characters>	GO:0005813:centrosome;GO:0000307:cyclin-dependent protein kinase holoenzyme complex;GO:0005737:cytoplasm;GO:0005634:nucleus;	GO:0016538:cyclin-dependent protein serine/threonine kinase regulator activity;	K05610;K09131;K10394;K02927	-;ko04340 Hedgehog signaling pathway;;ko03010 Ribosome;ko04120 Ubiquitin mediated proteolysis;ko04137 Mitophagy - animal;ko05012... <Preview truncated at 128 characters>
ENSG00000262919	199.658	1.24859	0.320295	0.127801	2.5062	0.0122036	0.038287	X	153587925	153600045	-	CCNQ	cyclin Q [Source:HGNC Symbol%3BAcc:HGNC:28434]	GO:0006357:regulation of transcription from RNA polymerase II promoter;	GO:0005634:nucleus;	GO:0016538:cyclin-dependent protein serine/threonine kinase regulator activity;	-	-
ENSG00000166226	4587.83	1.63073	0.705518	0.0475741	14.8299	9.3908e-50	1.5302e-47	12	69585426	69601570	+	CCT2	chaperonin containing TCP1 subunit 2 [Source:HGNC Symbol%3BAcc:HGNC:1615]	GO:0007339:binding of sperm to zona pellucida;GO:0051086:chaperone mediated protein folding independent of cofactor;GO:0051131:c... <Preview truncated at 128 characters>	GO:0035578:azurophil granule lumen;GO:0044297:cell body;GO:0005832:chaperonin-containing T-complex;GO:0005829:cytosol;GO:0070062... <Preview truncated at 128 characters>	GO:0005524:ATP binding;GO:0044183:protein binding involved in protein folding;GO:0031625:ubiquitin protein ligase binding;GO:005... <Preview truncated at 128 characters>	K09494	-
ENSG00000163468	6523.35	1.50073	0.585663	0.0426926	13.7182	7.90546e-43	9.49176e-41	1	156308968	156367873	-	CCT3	chaperonin containing TCP1 subunit 3 [Source:HGNC Symbol%3BAcc:HGNC:1616]	GO:0007339:binding of sperm to zona pellucida;GO:0046931:pore complex assembly;GO:0032212:positive regulation of telomere mainte... <Preview truncated at 128 characters>	GO:0044297:cell body;GO:0005832:chaperonin-containing T-complex;GO:0005856:cytoskeleton;GO:0005829:cytosol;GO:0070062:extracellu... <Preview truncated at 128 characters>	GO:0005524:ATP binding;GO:0044183:protein binding involved in protein folding;GO:0003723:RNA binding;GO:0051082:unfolded protein... <Preview truncated at 128 characters>	K09495	-
ENSG00000115484	5494.27	1.43071	0.516734	0.047809	10.8083	3.14456e-27	1.63966e-25	2	61868085	61888671	-	CCT4	chaperonin containing TCP1 subunit 4 [Source:HGNC Symbol%3BAcc:HGNC:1617]	GO:0007339:binding of sperm to zona pellucida;GO:0051973:positive regulation of telomerase activity;GO:0032212:positive regulati... <Preview truncated at 128 characters>	GO:0044297:cell body;GO:0042995:cell projection;GO:0005813:centrosome;GO:0005832:chaperonin-containing T-complex;GO:0005829:cyto... <Preview truncated at 128 characters>	GO:0005524:ATP binding;GO:0044183:protein binding involved in protein folding;GO:0003723:RNA binding;GO:0051082:unfolded protein... <Preview truncated at 128 characters>	K09496	-
ENSG00000150753	7244.94	1.55822	0.639901	0.0420635	15.2127	2.91135e-52	5.41426e-50	5	10249929	10266389	+	CCT5	chaperonin containing TCP1 subunit 5 [Source:HGNC Symbol%3BAcc:HGNC:1618]	GO:0007339:binding of sperm to zona pellucida;GO:0032212:positive regulation of telomere maintenance via telomerase;GO:0006457:p... <Preview truncated at 128 characters>	GO:0044297:cell body;GO:0005813:centrosome;GO:0005832:chaperonin-containing T-complex;GO:0005829:cytosol;GO:0070062:extracellula... <Preview truncated at 128 characters>	GO:0005524:ATP binding;GO:0048487:beta-tubulin binding;GO:0031681:G-protein beta-subunit binding;GO:0003730:mRNA 3-UTR binding;... <Preview truncated at 128 characters>	K09497	-
ENSG00000146731	9469.35	1.59213	0.670961	0.0415504	16.1481	1.17071e-58	2.88723e-56	7	56051685	56063989	+	CCT6A	chaperonin containing TCP1 subunit 6A [Source:HGNC Symbol%3BAcc:HGNC:1620]	GO:0032212:positive regulation of telomere maintenance via telomerase;GO:0006457:protein folding;GO:0050821:protein stabilizatio... <Preview truncated at 128 characters>	GO:0005832:chaperonin-containing T-complex;GO:0005737:cytoplasm;GO:0005829:cytosol;GO:0070062:extracellular exosome;GO:0005874:m... <Preview truncated at 128 characters>	GO:0005524:ATP binding;GO:0044183:protein binding involved in protein folding;GO:0003723:RNA binding;GO:0051082:unfolded protein... <Preview truncated at 128 characters>	K09498	-
ENSG00000135624	4674.04	1.42212	0.508038	0.0471036	10.7856	4.02818e-27	2.08847e-25	2	73233420	73253021	+	CCT7	chaperonin containing TCP1 subunit 7 [Source:HGNC Symbol%3BAcc:HGNC:1622]	GO:0007339:binding of sperm to zona pellucida;GO:0032212:positive regulation of telomere maintenance via telomerase;GO:0006457:p... <Preview truncated at 128 characters>	GO:0044297:cell body;GO:0005832:chaperonin-containing T-complex;GO:0005737:cytoplasm;GO:0005829:cytosol;GO:0070062:extracellular... <Preview truncated at 128 characters>	GO:0005524:ATP binding;GO:0044183:protein binding involved in protein folding;GO:0051082:unfolded protein binding;	K09499	-
ENSG00000156261	3859.95	1.47582	0.561519	0.0455913	12.3164	7.39552e-35	6.02537e-33	21	29055805	29073797	-	CCT8	chaperonin containing TCP1 subunit 8 [Source:HGNC Symbol%3BAcc:HGNC:1623]	GO:0007339:binding of sperm to zona pellucida;GO:0046931:pore complex assembly;GO:0032212:positive regulation of telomere mainte... <Preview truncated at 128 characters>	GO:0035578:azurophil granule lumen;GO:0044297:cell body;GO:0005813:centrosome;GO:0005832:chaperonin-containing T-complex;GO:0005... <Preview truncated at 128 characters>	GO:0005524:ATP binding;GO:0016887:ATPase activity;GO:0045296:cadherin binding;GO:0044183:protein binding involved in protein fol... <Preview truncated at 128 characters>	K09500	-
ENSG00000272398	8060.49	0.76112	-0.393805	0.0392294	-10.0385	1.03228e-23	4.38118e-22	6	106969831	106975627	-	CD24	CD24 molecule [Source:HGNC Symbol%3BAcc:HGNC:1645]	-	-	-	K06469	;ko04640 Hematopoietic cell lineage;
ENSG00000167775	146.96	1.65192	0.724146	0.163279	4.43503	9.20597e-06	6.1072e-05	19	8302127	8308358	-	CD320	CD320 molecule [Source:HGNC Symbol%3BAcc:HGNC:16692]	GO:0031296:B cell costimulation;GO:0009235:cobalamin metabolic process;GO:0015889:cobalamin transport;GO:0030890:positive regula... <Preview truncated at 128 characters>	GO:0005783:endoplasmic reticulum;GO:0010008:endosome membrane;GO:0005887:integral component of plasma membrane;GO:0016020:membra... <Preview truncated at 128 characters>	GO:0005509:calcium ion binding;GO:0038024:cargo receptor activity;GO:0031419:cobalamin binding;GO:0008083:growth factor activity... <Preview truncated at 128 characters>	K06734	-
ENSG00000026508	16436.5	1.36648	0.450459	0.0361319	12.4671	1.12857e-35	9.71528e-34	11	35138882	35232402	+	CD44	CD44 molecule (Indian blood group) [Source:HGNC Symbol%3BAcc:HGNC:1681]	GO:0007155:cell adhesion;GO:2000392:regulation of lamellipodium morphogenesis;GO:0044319:wound healing, spreading of cells;GO:00... <Preview truncated at 128 characters>	GO:0016324:apical plasma membrane;GO:0042995:cell projection;GO:0016021:integral component of membrane;GO:0031258:lamellipodium ... <Preview truncated at 128 characters>	GO:0005540:hyaluronic acid binding;GO:0005518:collagen binding;GO:0004888:transmembrane signaling receptor activity;GO:0005154:e... <Preview truncated at 128 characters>	K06256	;ko04512 ECM-receptor interaction;ko04640 Hematopoietic cell lineage;ko05131 Shigellosis;ko05169 Epstein-Barr virus infection;ko... <Preview truncated at 128 characters>
ENSG00000110651	1017.3	1.29443	0.372319	0.0652689	5.70439	1.16761e-08	1.24105e-07	11	2376177	2397802	+	CD81	CD81 molecule [Source:HGNC Symbol%3BAcc:HGNC:1701]	GO:0000187:activation of MAPK activity;GO:0035783:CD4-positive, alpha-beta T cell costimulation;GO:0071404:cellular response to ... <Preview truncated at 128 characters>	GO:0009925:basal plasma membrane;GO:0016323:basolateral plasma membrane;GO:0070062:extracellular exosome;GO:0005925:focal adhesi... <Preview truncated at 128 characters>	GO:0015485:cholesterol binding;GO:0005178:integrin binding;GO:0042289:MHC class II protein binding;GO:0023026:MHC class II prote... <Preview truncated at 128 characters>	K06508	;ko04662 B cell receptor signaling pathway;ko05144 Malaria;ko05160 Hepatitis C;
ENSG00000085117	827.592	0.644634	-0.633448	0.0717914	-8.82345	1.10982e-18	3.3478e-17	11	44564427	44620358	+	CD82	CD82 molecule [Source:HGNC Symbol%3BAcc:HGNC:6210]	-	GO:0070062:extracellular exosome;GO:0005887:integral component of plasma membrane;GO:0005886:plasma membrane;	-	K06509;K17985	;ko04115 p53 signaling pathway;;ko04137 Mitophagy - animal;ko04140 Autophagy - animal;ko05010 Alzheimer disease;ko05014 Amyotrop... <Preview truncated at 128 characters>
ENSG00000010278	9086.46	0.716922	-0.480111	0.0455789	-10.5336	6.04542e-26	2.95788e-24	12	6199715	6238271	+	CD9	CD9 molecule [Source:HGNC Symbol%3BAcc:HGNC:1709]	GO:0007420:brain development;GO:0007155:cell adhesion;GO:0071404:cellular response to low-density lipoprotein particle stimulus;... <Preview truncated at 128 characters>	GO:0016324:apical plasma membrane;GO:0030669:clathrin-coated endocytic vesicle membrane;GO:0030666:endocytic vesicle membrane;GO... <Preview truncated at 128 characters>	GO:0005178:integrin binding;	K06460	;ko04640 Hematopoietic cell lineage;
ENSG00000002586	663.173	1.20048	0.263607	0.0739617	3.5641	0.000365112	0.00175535	X	2691187	2741309	+	CD99	CD99 molecule (Xg blood group) [Source:HGNC Symbol%3BAcc:HGNC:7082]	GO:0034109:homotypic cell-cell adhesion;GO:2000391:positive regulation of neutrophil extravasation;GO:0072683:T cell extravasati... <Preview truncated at 128 characters>	GO:0005737:cytoplasm;GO:0005925:focal adhesion;GO:0005887:integral component of plasma membrane;GO:0005886:plasma membrane;	-	K06520	;ko04514 Cell adhesion molecules;ko04670 Leukocyte transendothelial migration;
ENSG00000158825	562.371	0.582019	-0.780862	0.172944	-4.5151	6.32861e-06	4.32088e-05	1	20589086	20618903	+	CDA	cytidine deaminase [Source:HGNC Symbol%3BAcc:HGNC:1712]	GO:0007166:cell surface receptor signaling pathway;GO:0009972:cytidine deamination;GO:0019858:cytosine metabolic process;GO:0030... <Preview truncated at 128 characters>	GO:0005829:cytosol;GO:0005576:extracellular region;GO:0034774:secretory granule lumen;	GO:0004126:cytidine deaminase activity;GO:0047844:deoxycytidine deaminase activity;GO:0042802:identical protein binding;GO:00018... <Preview truncated at 128 characters>	K01489	;ko00240 Pyrimidine metabolism;ko00983 Drug metabolism - other enzymes;ko01100 Metabolic pathways;
ENSG00000151465	1831.24	1.28014	0.356303	0.054594	6.52642	6.73612e-11	9.39864e-10	10	12195965	12250589	+	CDC123	cell division cycle 123 [Source:HGNC Symbol%3BAcc:HGNC:16827]	GO:0007049:cell cycle;GO:0051301:cell division;GO:0008284:positive regulation of cell proliferation;GO:0045948:positive regulati... <Preview truncated at 128 characters>	GO:0005737:cytoplasm;	-	-	-
ENSG00000081377	1112.37	0.795165	-0.330673	0.0665216	-4.97091	6.66388e-07	5.386e-06	9	96490241	96619843	-	CDC14B	cell division cycle 14B [Source:HGNC Symbol%3BAcc:HGNC:1719]	GO:0060271:cilium morphogenesis;GO:0006281:DNA repair;GO:0000226:microtubule cytoskeleton organization;GO:0000278:mitotic cell c... <Preview truncated at 128 characters>	GO:0005737:cytoplasm;GO:0005856:cytoskeleton;GO:0016021:integral component of membrane;GO:0005730:nucleolus;GO:0005813:centrosom... <Preview truncated at 128 characters>	GO:0004725:protein tyrosine phosphatase activity;GO:0008138:protein tyrosine/serine/threonine phosphatase activity;GO:0004722:pr... <Preview truncated at 128 characters>	K06639	;ko04110 Cell cycle;
ENSG00000164045	545.181	1.63016	0.705013	0.0889035	7.93009	2.18982e-15	4.90357e-14	3	48157146	48188417	-	CDC25A	cell division cycle 25A [Source:HGNC Symbol%3BAcc:HGNC:1725]	GO:0051301:cell division;GO:0008283:cell proliferation;GO:0034644:cellular response to UV;GO:0000082:G1/S transition of mitotic ... <Preview truncated at 128 characters>	GO:0005737:cytoplasm;GO:0005829:cytosol;GO:0005654:nucleoplasm;GO:0005634:nucleus;	GO:0051087:chaperone binding;GO:0004721:phosphoprotein phosphatase activity;GO:0019901:protein kinase binding;GO:0004725:protein... <Preview truncated at 128 characters>	K06645	;ko04110 Cell cycle;ko04218 Cellular senescence;ko04914 Progesterone-mediated oocyte maturation;ko05206 MicroRNAs in cancer;
ENSG00000105401	2047.33	1.24987	0.321784	0.0549439	5.85659	4.72479e-09	5.30631e-08	19	10391133	10420121	-	CDC37	cell division cycle 37%2C HSP90 cochaperone [Source:HGNC Symbol%3BAcc:HGNC:1735]	GO:0098779:activation of mitophagy in response to mitochondrial depolarization;GO:0010608:posttranscriptional regulation of gene... <Preview truncated at 128 characters>	GO:0005737:cytoplasm;GO:0005829:cytosol;GO:0070062:extracellular exosome;GO:1990565:HSP90-CDC37 chaperone complex;GO:0032991:mac... <Preview truncated at 128 characters>	GO:0051087:chaperone binding;GO:0031072:heat shock protein binding;GO:0051879:Hsp90 protein binding;GO:0019900:kinase binding;GO... <Preview truncated at 128 characters>	K09554	;ko04151 PI3K-Akt signaling pathway;
ENSG00000171219	867.857	0.670994	-0.575629	0.0695053	-8.2818	1.21322e-16	3.06667e-15	11	64823052	64844653	-	CDC42BPG	CDC42 binding protein kinase gamma [Source:HGNC Symbol%3BAcc:HGNC:29829]	GO:0031532:actin cytoskeleton reorganization;GO:0031032:actomyosin structure organization;GO:0035556:intracellular signal transd... <Preview truncated at 128 characters>	GO:0031252:cell leading edge;GO:0034451:centriolar satellite;GO:0005737:cytoplasm;GO:0005856:cytoskeleton;GO:0005829:cytosol;	GO:0005524:ATP binding;GO:0000287:magnesium ion binding;GO:0004674:protein serine/threonine kinase activity;	K16307	-
ENSG00000128283	304.51	1.84492	0.88356	0.127628	6.92293	4.42406e-12	7.12614e-11	22	37560480	37569405	+	CDC42EP1	CDC42 effector protein 1 [Source:HGNC Symbol%3BAcc:HGNC:17014]	GO:0030838:positive regulation of actin filament polymerization;GO:0031274:positive regulation of pseudopodium assembly;GO:00083... <Preview truncated at 128 characters>	GO:0005912:adherens junction;GO:0005737:cytoplasm;GO:0005856:cytoskeleton;GO:0005829:cytosol;GO:0012505:endomembrane system;GO:0... <Preview truncated at 128 characters>	GO:0098641:cadherin binding involved in cell-cell adhesion;	K03068	;ko04150 mTOR signaling pathway;ko04310 Wnt signaling pathway;ko04928 Parathyroid hormone synthesis, secretion and action;ko0501... <Preview truncated at 128 characters>
ENSG00000093009	1026.73	1.40253	0.48803	0.0613894	7.94974	1.86902e-15	4.22149e-14	22	19479457	19520612	+	CDC45	cell division cycle 45 [Source:HGNC Symbol%3BAcc:HGNC:1739]	GO:0000076:DNA replication checkpoint;GO:0006270:DNA replication initiation;GO:0000727:double-strand break repair via break-indu... <Preview truncated at 128 characters>	GO:0005813:centrosome;GO:0036064:ciliary basal body;GO:0005737:cytoplasm;GO:0031261:DNA replication preinitiation complex;GO:000... <Preview truncated at 128 characters>	GO:0003682:chromatin binding;GO:0003688:DNA replication origin binding;GO:0003697:single-stranded DNA binding;	K06628	;ko04110 Cell cycle;
ENSG00000094804	3951.9	1.45352	0.539549	0.0470343	11.4714	1.83681e-30	1.16395e-28	17	40287879	40304657	+	CDC6	cell division cycle 6 [Source:HGNC Symbol%3BAcc:HGNC:1744]	GO:0051301:cell division;GO:1904117:cellular response to vasopressin;GO:0000076:DNA replication checkpoint;GO:0006270:DNA replic... <Preview truncated at 128 characters>	GO:0005737:cytoplasm;GO:0005829:cytosol;GO:0045171:intercellular bridge;GO:0072686:mitotic spindle;GO:0005654:nucleoplasm;GO:000... <Preview truncated at 128 characters>	GO:0005524:ATP binding;GO:0003688:DNA replication origin binding;GO:0019900:kinase binding;GO:0000166:nucleotide binding;	K02213	;ko04110 Cell cycle;
ENSG00000170779	1258.08	1.28546	0.362289	0.0611533	5.92427	3.13692e-09	3.60282e-08	14	105009573	105021083	-	CDCA4	cell division cycle associated 4 [Source:HGNC Symbol%3BAcc:HGNC:14625]	GO:0048096:chromatin-mediated maintenance of transcription;	GO:0005829:cytosol;GO:0005654:nucleoplasm;GO:0005634:nucleus;GO:0005886:plasma membrane;	-	-	-
ENSG00000144354	1749	1.36451	0.448381	0.0542216	8.26941	1.34626e-16	3.37954e-15	2	173354820	173368997	+	CDCA7	cell division cycle associated 7 [Source:HGNC Symbol%3BAcc:HGNC:14628]	GO:0006915:apoptotic process;GO:0042127:regulation of cell proliferation;GO:0006355:regulation of transcription, DNA-templated;	GO:0005829:cytosol;GO:0005654:nucleoplasm;GO:0005634:nucleus;	-	K13088	;ko04152 AMPK signaling pathway;ko04657 IL-17 signaling pathway;
ENSG00000164649	2819.25	1.29717	0.375365	0.0451821	8.30782	9.7477e-17	2.47421e-15	7	21900899	21945903	-	CDCA7L	cell division cycle associated 7 like [Source:HGNC Symbol%3BAcc:HGNC:30777]	GO:0008284:positive regulation of cell proliferation;GO:0006355:regulation of transcription, DNA-templated;	GO:0005829:cytosol;GO:0001650:fibrillar center;GO:0005730:nucleolus;GO:0005654:nucleoplasm;GO:0005634:nucleus;	-	K10408	;ko05014 Amyotrophic lateral sclerosis;ko05016 Huntington disease;ko05022 Pathways of neurodegeneration - multiple diseases;
ENSG00000039068	6263.76	0.711766	-0.490524	0.0356295	-13.7673	4.00675e-43	4.9076e-41	16	68737292	68835537	+	CDH1	cadherin 1 [Source:HGNC Symbol%3BAcc:HGNC:1748]	GO:0034332:adherens junction organization;GO:0098609:cell-cell adhesion;GO:0098742:cell-cell adhesion via plasma-membrane adhesi... <Preview truncated at 128 characters>	GO:0015629:actin cytoskeleton;GO:0005912:adherens junction;GO:0043296:apical junction complex;GO:0016342:catenin complex;GO:0030... <Preview truncated at 128 characters>	GO:0030506:ankyrin binding;GO:0008013:beta-catenin binding;GO:0045296:cadherin binding;GO:0005509:calcium ion binding;GO:0050839... <Preview truncated at 128 characters>	K05689	;ko04015 Rap1 signaling pathway;ko04371 Apelin signaling pathway;ko04390 Hippo signaling pathway;ko04514 Cell adhesion molecules... <Preview truncated at 128 characters>
ENSG00000170558	667.488	1.52959	0.613148	0.0768954	7.9738	1.5387e-15	3.49705e-14	18	27932879	28177946	-	CDH2	cadherin 2 [Source:HGNC Symbol%3BAcc:HGNC:1759]	GO:0048514:blood vessel morphogenesis;GO:0007420:brain development;GO:0048854:brain morphogenesis;GO:0016339:calcium-dependent c... <Preview truncated at 128 characters>	GO:0005912:adherens junction;GO:0045177:apical part of cell;GO:0016324:apical plasma membrane;GO:0016327:apicolateral plasma mem... <Preview truncated at 128 characters>	GO:0045294:alpha-catenin binding;GO:0008013:beta-catenin binding;GO:0045296:cadherin binding;GO:0005509:calcium ion binding;GO:0... <Preview truncated at 128 characters>	K06736	;ko04514 Cell adhesion molecules;ko05412 Arrhythmogenic right ventricular cardiomyopathy;
ENSG00000179242	206.225	2.40606	1.26667	0.14493	8.73989	2.33329e-18	6.87925e-17	20	61252261	61940617	+	CDH4	cadherin 4 [Source:HGNC Symbol%3BAcc:HGNC:1763]	GO:0007411:axon guidance;GO:0098742:cell-cell adhesion via plasma-membrane adhesion molecules;GO:0007157:heterophilic cell-cell ... <Preview truncated at 128 characters>	GO:0016342:catenin complex;GO:0005887:integral component of plasma membrane;GO:0005886:plasma membrane;	GO:0045296:cadherin binding;GO:0005509:calcium ion binding;	K06797	;ko04514 Cell adhesion molecules;
ENSG00000167258	3968.61	1.25836	0.331548	0.0442991	7.48432	7.19187e-14	1.41283e-12	17	39461486	39564907	+	CDK12	cyclin dependent kinase 12 [Source:HGNC Symbol%3BAcc:HGNC:24224]	GO:0006397:mRNA processing;GO:2000737:negative regulation of stem cell differentiation;GO:0070816:phosphorylation of RNA polymer... <Preview truncated at 128 characters>	GO:0002944:cyclin K-CDK12 complex;GO:0000307:cyclin-dependent protein kinase holoenzyme complex;GO:0008024:positive transcriptio... <Preview truncated at 128 characters>	GO:0005524:ATP binding;GO:0030332:cyclin binding;GO:0004693:cyclin-dependent protein serine/threonine kinase activity;GO:0004672... <Preview truncated at 128 characters>	K08819;K06115	-
ENSG00000155111	535.268	0.67983	-0.556753	0.0833542	-6.67936	2.39981e-11	3.54341e-10	6	110609978	110815958	-	CDK19	cyclin dependent kinase 19 [Source:HGNC Symbol%3BAcc:HGNC:19338]	GO:0071222:cellular response to lipopolysaccharide;GO:0043065:positive regulation of apoptotic process;GO:0050729:positive regul... <Preview truncated at 128 characters>	GO:0005829:cytosol;GO:0016592:mediator complex;GO:0005634:nucleus;GO:0048471:perinuclear region of cytoplasm;	GO:0005524:ATP binding;GO:0004693:cyclin-dependent protein serine/threonine kinase activity;GO:0008353:RNA polymerase II carboxy... <Preview truncated at 128 characters>	K02208	-
ENSG00000123374	1162.91	1.35262	0.435752	0.0573422	7.59914	2.98103e-14	6.11679e-13	12	55966781	55972789	+	CDK2	cyclin dependent kinase 2 [Source:HGNC Symbol%3BAcc:HGNC:1771]	GO:0051301:cell division;GO:0071732:cellular response to nitric oxide;GO:0090398:cellular senescence;GO:0007099:centriole replic... <Preview truncated at 128 characters>	GO:0015030:Cajal body;GO:0005813:centrosome;GO:0097123:cyclin A1-CDK2 complex;GO:0097124:cyclin A2-CDK2 complex;GO:0097134:cycli... <Preview truncated at 128 characters>	GO:0005524:ATP binding;GO:0030332:cyclin binding;GO:0097472:cyclin-dependent protein kinase activity;GO:0004693:cyclin-dependent... <Preview truncated at 128 characters>	K02206	;ko04068 FoxO signaling pathway;ko04110 Cell cycle;ko04114 Oocyte meiosis;ko04115 p53 signaling pathway;ko04151 PI3K-Akt signali... <Preview truncated at 128 characters>
ENSG00000111328	1598.23	1.19363	0.255362	0.055266	4.6206	3.82637e-06	2.71295e-05	12	123250112	123272334	-	CDK2AP1	cyclin dependent kinase 2 associated protein 1 [Source:HGNC Symbol%3BAcc:HGNC:14002]	GO:0007049:cell cycle;GO:0006261:DNA-dependent DNA replication;GO:0001934:positive regulation of protein phosphorylation;	GO:0005829:cytosol;GO:0005654:nucleoplasm;GO:0005634:nucleus;GO:0048471:perinuclear region of cytoplasm;	GO:0070182:DNA polymerase binding;	K09548	-
ENSG00000135446	1556.4	1.34322	0.425694	0.051229	8.30963	9.60004e-17	2.44012e-15	12	57747727	57756013	-	CDK4	cyclin dependent kinase 4 [Source:HGNC Symbol%3BAcc:HGNC:1773]	GO:0060612:adipose tissue development;GO:0031100:organ regeneration;GO:0051301:cell division;GO:0032869:cellular response to ins... <Preview truncated at 128 characters>	GO:0005923:bicellular tight junction;GO:0000785:chromatin;GO:0097129:cyclin D2-CDK4 complex;GO:0000307:cyclin-dependent protein ... <Preview truncated at 128 characters>	GO:0005524:ATP binding;GO:0030332:cyclin binding;GO:0004693:cyclin-dependent protein serine/threonine kinase activity;GO:0016538... <Preview truncated at 128 characters>	K02089	;ko01522 Endocrine resistance;ko04110 Cell cycle;ko04115 p53 signaling pathway;ko04151 PI3K-Akt signaling pathway;ko04218 Cellul... <Preview truncated at 128 characters>
ENSG00000134058	1656.11	1.3751	0.459538	0.0524678	8.75848	1.97909e-18	5.88247e-17	5	69234795	69277430	+	CDK7	cyclin dependent kinase 7 [Source:HGNC Symbol%3BAcc:HGNC:1778]	GO:0007049:cell cycle;GO:0051301:cell division;GO:0006281:DNA repair;GO:0070816:phosphorylation of RNA polymerase II C-terminal ... <Preview truncated at 128 characters>	GO:0070516:CAK-ERCC2 complex;GO:0019907:cyclin-dependent protein kinase activating kinase holoenzyme complex;GO:0005737:cytoplas... <Preview truncated at 128 characters>	GO:0005524:ATP binding;GO:0008094:DNA-dependent ATPase activity;GO:0004693:cyclin-dependent protein serine/threonine kinase acti... <Preview truncated at 128 characters>	K02202	;ko03022 Basal transcription factors;ko03420 Nucleotide excision repair;ko04110 Cell cycle;
ENSG00000111276	970.954	0.778046	-0.362073	0.0623359	-5.80841	6.30676e-09	6.97144e-08	12	12685498	12722369	+	CDKN1B	cyclin dependent kinase inhibitor 1B [Source:HGNC Symbol%3BAcc:HGNC:1785]	GO:0048102:autophagic cell death;GO:0071236:cellular response to antibiotic;GO:0071285:cellular response to lithium ion;GO:00714... <Preview truncated at 128 characters>	GO:0031464:Cul4A-RING E3 ubiquitin ligase complex;GO:0005737:cytoplasm;GO:0005829:cytosol;GO:0005768:endosome;GO:0043231:intrace... <Preview truncated at 128 characters>	GO:0051087:chaperone binding;GO:0030332:cyclin binding;GO:0004861:cyclin-dependent protein serine/threonine kinase inhibitor act... <Preview truncated at 128 characters>	K06624	;ko01522 Endocrine resistance;ko04012 ErbB signaling pathway;ko04066 HIF-1 signaling pathway;ko04068 FoxO signaling pathway;ko04... <Preview truncated at 128 characters>
ENSG00000147889	430.794	0.768753	-0.379408	0.0976106	-3.88695	0.00010151	0.000549719	9	21967752	21995301	-	CDKN2A	cyclin dependent kinase inhibitor 2A [Source:HGNC Symbol%3BAcc:HGNC:1787]	GO:0090398:cellular senescence;GO:0000082:G1/S transition of mitotic cell cycle;GO:0030308:negative regulation of cell growth;GO... <Preview truncated at 128 characters>	GO:0005737:cytoplasm;GO:0005829:cytosol;GO:0005634:nucleus;GO:0035985:senescence-associated heterochromatin focus;	GO:0004861:cyclin-dependent protein serine/threonine kinase inhibitor activity;GO:0051059:NF-kappaB binding;GO:0019901:protein k... <Preview truncated at 128 characters>	K06621	;ko01522 Endocrine resistance;ko01524 Platinum drug resistance;ko04110 Cell cycle;ko04115 p53 signaling pathway;ko04218 Cellular... <Preview truncated at 128 characters>
ENSG00000147883	409.94	0.569071	-0.813318	0.0954518	-8.52072	1.58568e-17	4.31919e-16	9	22002903	22009305	-	CDKN2B	cyclin dependent kinase inhibitor 2B [Source:HGNC Symbol%3BAcc:HGNC:1788]	GO:0031668:cellular response to extracellular stimulus;GO:0031670:cellular response to nutrient;GO:0090398:cellular senescence;G... <Preview truncated at 128 characters>	GO:0005737:cytoplasm;GO:0005829:cytosol;GO:0005634:nucleus;	GO:0004861:cyclin-dependent protein serine/threonine kinase inhibitor activity;GO:0019901:protein kinase binding;	K04685	;ko04068 FoxO signaling pathway;ko04110 Cell cycle;ko04218 Cellular senescence;ko04350 TGF-beta signaling pathway;ko04934 Cushin... <Preview truncated at 128 characters>
ENSG00000240498	141.128	0.586799	-0.769062	0.15333	-5.01572	5.28344e-07	4.33556e-06	9	21994139	22128103	+	CDKN2B-AS1	CDKN2B antisense RNA 1 [Source:HGNC Symbol%3BAcc:HGNC:34341]	-	-	-	-	-
ENSG00000123080	238.103	0.669349	-0.57917	0.125019	-4.63266	3.60989e-06	2.57245e-05	1	50960745	50974634	+	CDKN2C	cyclin dependent kinase inhibitor 2C [Source:HGNC Symbol%3BAcc:HGNC:1789]	GO:0000082:G1/S transition of mitotic cell cycle;GO:0030308:negative regulation of cell growth;GO:0008285:negative regulation of... <Preview truncated at 128 characters>	GO:0005737:cytoplasm;GO:0005829:cytosol;GO:0005634:nucleus;	GO:0004861:cyclin-dependent protein serine/threonine kinase inhibitor activity;GO:0019901:protein kinase binding;	K06622	;ko01522 Endocrine resistance;ko04110 Cell cycle;ko04934 Cushing syndrome;ko05166 Human T-cell leukemia virus 1 infection;ko0520... <Preview truncated at 128 characters>
ENSG00000140743	669.263	1.40152	0.48699	0.0771742	6.31026	2.78565e-10	3.64431e-09	16	22345936	22437165	-	CDR2	cerebellar degeneration related protein 2 [Source:HGNC Symbol%3BAcc:HGNC:1799]	GO:0010976:positive regulation of neuron projection development;GO:0006361:transcription initiation from RNA polymerase I promot... <Preview truncated at 128 characters>	GO:0005730:nucleolus;GO:0005654:nucleoplasm;GO:0005634:nucleus;	GO:0001042:RNA polymerase I core binding;GO:0001164:RNA polymerase I CORE element sequence-specific DNA binding;GO:0001181:core ... <Preview truncated at 128 characters>	K15216	-
ENSG00000091527	5424.37	1.26038	0.333854	0.0489755	6.81676	9.3117e-12	1.4562e-10	3	133573686	133590261	+	CDV3	CDV3 homolog [Source:HGNC Symbol%3BAcc:HGNC:26928]	-	GO:0005737:cytoplasm;GO:0005829:cytosol;GO:0005886:plasma membrane;	-	-	-
ENSG00000153046	742.237	1.3184	0.398787	0.0704534	5.66029	1.51116e-08	1.58316e-07	6	4706159	4955551	+	CDYL	chromodomain Y like [Source:HGNC Symbol%3BAcc:HGNC:1811]	GO:0060816:random inactivation of X chromosome;GO:0007286:spermatid development;GO:0007283:spermatogenesis;	GO:0005694:chromosome;GO:0005737:cytoplasm;GO:0016607:nuclear speck;GO:0005634:nucleus;	GO:0003682:chromatin binding;GO:0042802:identical protein binding;GO:0035064:methylated histone binding;GO:0030674:protein bindi... <Preview truncated at 128 characters>	K00653	-
ENSG00000172216	502.25	1.45605	0.542056	0.0991867	5.465	4.62899e-08	4.52243e-07	20	50190830	50192668	+	CEBPB	CCAAT enhancer binding protein beta [Source:HGNC Symbol%3BAcc:HGNC:1834]	GO:0006953:acute-phase response;GO:0050873:brown fat cell differentiation;GO:0071230:cellular response to amino acid stimulus;GO... <Preview truncated at 128 characters>	GO:0036488:CHOP-C/EBP complex;GO:0000785:chromatin;GO:0000779:condensed chromosome, centromeric region;GO:0005737:cytoplasm;	GO:0003682:chromatin binding;GO:0003677:DNA binding;GO:0001228:RNA polymerase II transcription regulatory region sequence-specif... <Preview truncated at 128 characters>	K10048	;ko04657 IL-17 signaling pathway;ko04668 TNF signaling pathway;ko05152 Tuberculosis;ko05202 Transcriptional misregulation in can... <Preview truncated at 128 characters>
ENSG00000153879	761.779	1.40726	0.492892	0.0670876	7.34698	2.02729e-13	3.82663e-12	19	33373685	33382686	+	CEBPG	CCAAT enhancer binding protein gamma [Source:HGNC Symbol%3BAcc:HGNC:1837]	GO:0030183:B cell differentiation;GO:0043353:enucleate erythrocyte differentiation;GO:0006955:immune response;GO:0001889:liver d... <Preview truncated at 128 characters>	GO:0000785:chromatin;GO:0005654:nucleoplasm;GO:0005634:nucleus;	GO:0003677:DNA binding;GO:0001228:RNA polymerase II transcription regulatory region sequence-specific DNA binding transcription ... <Preview truncated at 128 characters>	K10049	;ko05152 Tuberculosis;
ENSG00000115816	2507.67	1.26849	0.343113	0.0539338	6.36174	1.99479e-10	2.64578e-09	2	37201612	37231596	-	CEBPZ	CCAAT enhancer binding protein zeta [Source:HGNC Symbol%3BAcc:HGNC:24218]	GO:0045944:positive regulation of transcription from RNA polymerase II promoter;	GO:0005634:nucleus;	GO:0003723:RNA binding;GO:0003713:transcription coactivator activity;	K14832	-
ENSG00000143126	2499.72	0.729344	-0.455329	0.052738	-8.63378	5.93572e-18	1.67689e-16	1	109249539	109275751	+	CELSR2	cadherin EGF LAG seven-pass G-type receptor 2 [Source:HGNC Symbol%3BAcc:HGNC:3231]	GO:0098609:cell-cell adhesion;GO:0033326:cerebrospinal fluid secretion;GO:0060271:cilium morphogenesis;GO:0003341:cilium movemen... <Preview truncated at 128 characters>	GO:0005737:cytoplasm;GO:0016021:integral component of membrane;GO:0005886:plasma membrane;	GO:0005509:calcium ion binding;GO:0004930:G-protein coupled receptor activity;	K04601	-
ENSG00000103888	928.867	1.44063	0.526702	0.0659063	7.99168	1.33111e-15	3.05569e-14	15	80779343	80951776	+	CEMIP	cell migration inducing hyaluronidase 1 [Source:HGNC Symbol%3BAcc:HGNC:29213]	GO:0030213:hyaluronan biosynthetic process;GO:0030214:hyaluronan catabolic process;GO:0030335:positive regulation of cell migrat... <Preview truncated at 128 characters>	GO:0045334:clathrin-coated endocytic vesicle;GO:0005905:coated pit;GO:0030665:clathrin-coated vesicle membrane;GO:0005737:cytopl... <Preview truncated at 128 characters>	GO:0032050:clathrin heavy chain binding;GO:0046923:ER retention sequence binding;GO:0005540:hyaluronic acid binding;GO:0004415:h... <Preview truncated at 128 characters>	K19031	-
ENSG00000135048	1543.86	1.22004	0.286927	0.0526494	5.44975	5.04394e-08	4.88339e-07	9	71683366	71816690	-	CEMIP2	cell migration inducing hyaluronidase 2 [Source:HGNC Symbol%3BAcc:HGNC:11869]	GO:0001525:angiogenesis;GO:0030214:hyaluronan catabolic process;GO:1903670:regulation of sprouting angiogenesis;	GO:0070062:extracellular exosome;GO:0016021:integral component of membrane;GO:0005887:integral component of plasma membrane;GO:0... <Preview truncated at 128 characters>	GO:0045296:cadherin binding;GO:0005509:calcium ion binding;GO:0004415:hyalurononglucosaminidase activity;	K17429	-
ENSG00000125817	2284.34	1.19719	0.259646	0.0511691	5.07428	3.88962e-07	3.27378e-06	20	3783851	3786740	-	CENPB	centromere protein B [Source:HGNC Symbol%3BAcc:HGNC:1852]	-	GO:0005694:chromosome;GO:0000775:chromosome, centromeric region;GO:0000779:condensed chromosome, centromeric region;GO:0016604:n... <Preview truncated at 128 characters>	GO:0019237:centromeric DNA binding;GO:0003682:chromatin binding;GO:0003677:DNA binding;GO:0003696:satellite DNA binding;GO:00435... <Preview truncated at 128 characters>	K11496	-
ENSG00000117724	10772.1	0.830427	-0.268074	0.0420622	-6.37328	1.85027e-10	2.47018e-09	1	214603195	214664571	+	CENPF	centromere protein F [Source:HGNC Symbol%3BAcc:HGNC:1857]	GO:0030154:cell differentiation;GO:0051301:cell division;GO:0007059:chromosome segregation;GO:0071897:DNA biosynthetic process;G... <Preview truncated at 128 characters>	GO:0005930:axoneme;GO:0005813:centrosome;GO:0000775:chromosome, centromeric region;GO:0036064:ciliary basal body;GO:0097539:cili... <Preview truncated at 128 characters>	GO:0003682:chromatin binding;GO:0070840:dynein complex binding;GO:0008017:microtubule binding;GO:0008022:protein C-terminus bind... <Preview truncated at 128 characters>	K11499	-
ENSG00000123219	948.439	1.26255	0.336342	0.0628041	5.35542	8.5359e-08	7.97645e-07	5	65517766	65563168	-	CENPK	centromere protein K [Source:HGNC Symbol%3BAcc:HGNC:29479]	GO:0051382:kinetochore assembly;GO:0000070:mitotic sister chromatid segregation;	GO:0005829:cytosol;GO:0000939:condensed chromosome inner kinetochore;GO:0005654:nucleoplasm;	-	K11503;K17985	-;ko04137 Mitophagy - animal;ko04140 Autophagy - animal;ko05010 Alzheimer disease;ko05014 Amyotrophic lateral sclerosis;ko05016 ... <Preview truncated at 128 characters>
ENSG00000138092	468.937	1.32644	0.407559	0.0923075	4.41523	1.009e-05	6.65497e-05	2	24793136	24822376	+	CENPO	centromere protein O [Source:HGNC Symbol%3BAcc:HGNC:28152]	GO:0034508:centromere complex assembly;	GO:0005829:cytosol;GO:0000776:kinetochore;GO:0031511:Mis6-Sim4 complex;GO:0016604:nuclear body;GO:0005654:nucleoplasm;	-	K11507	-
ENSG00000166582	309.152	1.76176	0.817021	0.105047	7.77765	7.38828e-15	1.58818e-13	17	16342534	16353656	-	CENPV	centromere protein V [Source:HGNC Symbol%3BAcc:HGNC:29920]	GO:0001667:ameboidal-type cell migration;GO:0007049:cell cycle;GO:0051301:cell division;GO:0034508:centromere complex assembly;G... <Preview truncated at 128 characters>	GO:0005829:cytosol;GO:0000776:kinetochore;GO:0015630:microtubule cytoskeleton;GO:0030496:midbody;GO:0031965:nuclear membrane;GO:... <Preview truncated at 128 characters>	GO:0016846:carbon-sulfur lyase activity;GO:0046872:metal ion binding;	K03434;K12581	;ko00563 Glycosylphosphatidylinositol (GPI)-anchor biosynthesis;ko01100 Metabolic pathways;;ko03018 RNA degradation;
ENSG00000169689	248.185	1.32079	0.401401	0.115901	3.46332	0.000533558	0.00245895	17	82018702	82024107	-	CENPX	centromere protein X [Source:HGNC Symbol%3BAcc:HGNC:11422]	GO:0051301:cell division;GO:0006281:DNA repair;GO:0051382:kinetochore assembly;GO:0031297:replication fork processing;GO:0000712... <Preview truncated at 128 characters>	GO:0071821:FANCM-MHF complex;GO:0043240:Fanconi anaemia nuclear complex;GO:0000776:kinetochore;GO:0005654:nucleoplasm;	GO:0003677:DNA binding;GO:0003690:double-stranded DNA binding;	K15360	;ko03460 Fanconi anemia pathway;
ENSG00000168944	782.009	1.18996	0.250913	0.0702898	3.56969	0.000357402	0.001721	5	123344890	123423592	-	CEP120	centrosomal protein 120 [Source:HGNC Symbol%3BAcc:HGNC:26690]	GO:0030953:astral microtubule organization;GO:0007098:centrosome cycle;GO:0021987:cerebral cortex development;GO:0022027:interki... <Preview truncated at 128 characters>	GO:0005814:centriole;GO:0005813:centrosome;GO:0005737:cytoplasm;	GO:0008022:protein C-terminus binding;	K16459	-
ENSG00000100629	503.097	1.20979	0.274761	0.0874035	3.1436	0.00166886	0.00681206	14	80476983	80959517	-	CEP128	centrosomal protein 128 [Source:HGNC Symbol%3BAcc:HGNC:20359]	GO:0008104:protein localization;	GO:0005814:centriole;GO:0005737:cytoplasm;GO:0000922:spindle pole;	-	K16460	-
ENSG00000143702	1630.4	1.21497	0.280922	0.0625842	4.48871	7.16552e-06	4.84336e-05	1	243124428	243255348	-	CEP170	centrosomal protein 170 [Source:HGNC Symbol%3BAcc:HGNC:28920]	-	GO:0005814:centriole;GO:0005813:centrosome;GO:0005829:cytosol;GO:0005874:microtubule;GO:0072686:mitotic spindle;GO:0005634:nucle... <Preview truncated at 128 characters>	GO:0003677:DNA binding;GO:0046872:metal ion binding;	K16463	-
ENSG00000135837	2453.19	0.799958	-0.322003	0.0474984	-6.77924	1.20813e-11	1.8528e-10	1	179954773	180114875	+	CEP350	centrosomal protein 350 [Source:HGNC Symbol%3BAcc:HGNC:24238]	GO:0034453:microtubule anchoring;GO:0071539:protein localization to centrosome;	GO:0042995:cell projection;GO:0005814:centriole;GO:0005813:centrosome;GO:0005737:cytoplasm;GO:0016020:membrane;GO:0005634:nucleu... <Preview truncated at 128 characters>	GO:0008017:microtubule binding;	K16768	-
ENSG00000183137	402.603	1.21756	0.283992	0.102669	2.7661	0.00567313	0.0198611	6	109095110	109174418	+	CEP57L1	centrosomal protein 57 like 1 [Source:HGNC Symbol%3BAcc:HGNC:21561]	-	GO:0005813:centrosome;GO:0005737:cytoplasm;GO:0005874:microtubule;	GO:0043015:gamma-tubulin binding;GO:0042802:identical protein binding;GO:0008017:microtubule binding;	K16762;K18047	-
ENSG00000173588	580.535	1.25487	0.327541	0.0834789	3.92363	8.7223e-05	0.000479175	12	94306449	94459988	-	CEP83	centrosomal protein 83 [Source:HGNC Symbol%3BAcc:HGNC:17966]	GO:0060271:cilium morphogenesis;GO:0051660:establishment of centrosome localization;GO:0071539:protein localization to centrosom... <Preview truncated at 128 characters>	GO:0005814:centriole;GO:0097539:ciliary transition fiber;GO:0005829:cytosol;GO:0005794:Golgi apparatus;	GO:0042802:identical protein binding;	K16754	-
ENSG00000143418	1606.18	1.24502	0.316169	0.0511302	6.1836	6.26559e-10	7.81593e-09	1	150960583	150975003	-	CERS2	ceramide synthase 2 [Source:HGNC Symbol%3BAcc:HGNC:14076]	GO:0046513:ceramide biosynthetic process;GO:0048681:negative regulation of axon regeneration;GO:1900148:negative regulation of S... <Preview truncated at 128 characters>	GO:0005783:endoplasmic reticulum;GO:0005789:endoplasmic reticulum membrane;GO:0016021:integral component of membrane;GO:0016020:... <Preview truncated at 128 characters>	GO:0003677:DNA binding;GO:0016410:N-acyltransferase activity;GO:0050291:sphingosine N-acyltransferase activity;	K04710	;ko00600 Sphingolipid metabolism;ko01100 Metabolic pathways;ko04071 Sphingolipid signaling pathway;
ENSG00000154227	156.486	0.572307	-0.805139	0.148215	-5.43225	5.56491e-08	5.34243e-07	15	100400395	100544995	-	CERS3	ceramide synthase 3 [Source:HGNC Symbol%3BAcc:HGNC:23752]	GO:0046513:ceramide biosynthetic process;GO:0070268:cornification;GO:0008544:epidermis development;GO:0030216:keratinocyte diffe... <Preview truncated at 128 characters>	GO:0005783:endoplasmic reticulum;GO:0005789:endoplasmic reticulum membrane;GO:0016021:integral component of membrane;	GO:0003677:DNA binding;GO:0016410:N-acyltransferase activity;GO:0050291:sphingosine N-acyltransferase activity;	K04710	;ko00600 Sphingolipid metabolism;ko01100 Metabolic pathways;ko04071 Sphingolipid signaling pathway;
ENSG00000090661	142.511	0.482368	-1.0518	0.157201	-6.69075	2.22024e-11	3.29426e-10	19	8206736	8262421	+	CERS4	ceramide synthase 4 [Source:HGNC Symbol%3BAcc:HGNC:23747]	GO:0046513:ceramide biosynthetic process;GO:0030148:sphingolipid biosynthetic process;	GO:0005783:endoplasmic reticulum;GO:0005789:endoplasmic reticulum membrane;GO:0016021:integral component of membrane;	GO:0003677:DNA binding;GO:0016410:N-acyltransferase activity;GO:0050291:sphingosine N-acyltransferase activity;	K04710	;ko00600 Sphingolipid metabolism;ko01100 Metabolic pathways;ko04071 Sphingolipid signaling pathway;
ENSG00000172292	777.047	0.729697	-0.454631	0.0704329	-6.45481	1.08358e-10	1.4813e-09	2	168456249	168775134	+	CERS6	ceramide synthase 6 [Source:HGNC Symbol%3BAcc:HGNC:23826]	GO:0046513:ceramide biosynthetic process;GO:0006954:inflammatory response;GO:0030148:sphingolipid biosynthetic process;	GO:0005783:endoplasmic reticulum;GO:0005789:endoplasmic reticulum membrane;GO:0016021:integral component of membrane;GO:0016020:... <Preview truncated at 128 characters>	GO:0003677:DNA binding;GO:0016410:N-acyltransferase activity;GO:0050291:sphingosine N-acyltransferase activity;	K04710	;ko00600 Sphingolipid metabolism;ko01100 Metabolic pathways;ko04071 Sphingolipid signaling pathway;
ENSG00000070761	715.483	1.33118	0.412701	0.0733226	5.62857	1.81712e-08	1.87676e-07	16	58113592	58129381	-	CFAP20	cilia and flagella associated protein 20 [Source:HGNC Symbol%3BAcc:HGNC:29523]	GO:0060271:cilium morphogenesis;GO:0007275:multicellular organismal development;GO:2000147:positive regulation of cell motility;... <Preview truncated at 128 characters>	GO:0005814:centriole;GO:0036064:ciliary basal body;GO:0005929:cilium;GO:0005737:cytoplasm;GO:0070062:extracellular exosome;GO:00... <Preview truncated at 128 characters>	GO:0003723:RNA binding;	-	-
ENSG00000159079	258.42	1.31755	0.397858	0.116545	3.41377	0.000640708	0.00289429	21	32592079	32612603	-	CFAP298	cilia and flagella associated protein 298 [Source:HGNC Symbol%3BAcc:HGNC:1301]	GO:0060271:cilium morphogenesis;GO:0003352:regulation of cilium movement;	GO:0005929:cilium;GO:0005856:cytoskeleton;GO:0005829:cytosol;GO:0005634:nucleus;	-	K17985	;ko04137 Mitophagy - animal;ko04140 Autophagy - animal;ko05010 Alzheimer disease;ko05014 Amyotrophic lateral sclerosis;ko05016 H... <Preview truncated at 128 characters>
ENSG00000206530	276.778	0.769315	-0.378353	0.110307	-3.42999	0.000603594	0.00274734	3	113286930	113441610	-	CFAP44	cilia and flagella associated protein 44 [Source:HGNC Symbol%3BAcc:HGNC:25631]	GO:0060271:cilium morphogenesis;GO:0060285:cilium-dependent cell motility;GO:0000226:microtubule cytoskeleton organization;GO:00... <Preview truncated at 128 characters>	GO:0005737:cytoplasm;GO:0005856:cytoskeleton;GO:0031514:motile cilium;	GO:0008233:peptidase activity;	-	-
ENSG00000164323	2241.39	1.44817	0.534226	0.0510909	10.4564	1.36964e-25	6.54341e-24	4	185159665	185209504	-	CFAP97	cilia and flagella associated protein 97 [Source:HGNC Symbol%3BAcc:HGNC:29276]	-	-	-	K12581	;ko03018 RNA degradation;
ENSG00000000971	177.612	0.449015	-1.15517	0.148234	-7.79284	6.55181e-15	1.41504e-13	1	196651754	196752476	+	CFH	complement factor H [Source:HGNC Symbol%3BAcc:HGNC:4883]	GO:0006956:complement activation;GO:0006957:complement activation, alternative pathway;GO:0030449:regulation of complement activ... <Preview truncated at 128 characters>	GO:0072562:blood microparticle;GO:0070062:extracellular exosome;GO:0005576:extracellular region;GO:0005615:extracellular space;	GO:0043395:heparan sulfate proteoglycan binding;GO:0008201:heparin binding;GO:0042802:identical protein binding;	K04004	;ko04610 Complement and coagulation cascades;ko05150 Staphylococcus aureus infection;
ENSG00000172757	8086.24	1.20618	0.270441	0.0474744	5.69658	1.22238e-08	1.29775e-07	11	65823022	65862026	-	CFL1	cofilin 1 [Source:HGNC Symbol%3BAcc:HGNC:1874]	GO:0030036:actin cytoskeleton organization;GO:0030042:actin filament depolymerization;GO:0030043:actin filament fragmentation;GO... <Preview truncated at 128 characters>	GO:0015629:actin cytoskeleton;GO:0005737:cytoplasm;GO:0005829:cytosol;GO:0070062:extracellular exosome;GO:0005615:extracellular ... <Preview truncated at 128 characters>	GO:0051015:actin filament binding;	K05765	;ko04360 Axon guidance;ko04666 Fc gamma R-mediated phagocytosis;ko04810 Regulation of actin cytoskeleton;ko05133 Pertussis;ko051... <Preview truncated at 128 characters>
ENSG00000003402	533.732	0.562089	-0.83113	0.0815255	-10.1947	2.0935e-24	9.25095e-23	2	201116154	201176687	+	CFLAR	CASP8 and FADD like apoptosis regulator [Source:HGNC Symbol%3BAcc:HGNC:1876]	GO:0006919:activation of cysteine-type endopeptidase activity involved in apoptotic process;GO:0006915:apoptotic process;GO:0071... <Preview truncated at 128 characters>	GO:0031265:CD95 death-inducing signaling complex;GO:0005737:cytoplasm;GO:0005829:cytosol;GO:0031264:death-inducing signaling com... <Preview truncated at 128 characters>	GO:0097153:cysteine-type endopeptidase activity involved in apoptotic process;GO:0097199:cysteine-type endopeptidase activity in... <Preview truncated at 128 characters>	K04724;K00088;K02927	;ko04064 NF-kappa B signaling pathway;ko04140 Autophagy - animal;ko04210 Apoptosis;ko04217 Necroptosis;ko04668 TNF signaling pat... <Preview truncated at 128 characters>
ENSG00000164430	270.071	1.42016	0.506053	0.110279	4.58886	4.45671e-06	3.13067e-05	6	73413515	73452297	-	CGAS	cyclic GMP-AMP synthase [Source:HGNC Symbol%3BAcc:HGNC:21367]	GO:0002218:activation of innate immune response;GO:0006974:cellular response to DNA damage stimulus;GO:0071360:cellular response... <Preview truncated at 128 characters>	GO:0005829:cytosol;GO:0005634:nucleus;GO:0005886:plasma membrane;GO:0035861:site of double-strand break;	GO:0005524:ATP binding;GO:0003682:chromatin binding;GO:0061501:cyclic-GMP-AMP synthase activity;GO:0003677:DNA binding;GO:000369... <Preview truncated at 128 characters>	K17834	;ko04623 Cytosolic DNA-sensing pathway;ko05131 Shigellosis;ko05163 Human cytomegalovirus infection;ko05168 Herpes simplex virus ... <Preview truncated at 128 characters>
ENSG00000143375	639.378	0.722876	-0.468181	0.0753089	-6.2168	5.07386e-10	6.43041e-09	1	151510510	151538692	+	CGN	cingulin [Source:HGNC Symbol%3BAcc:HGNC:17429]	-	GO:0005923:bicellular tight junction;GO:0030054:cell junction;GO:0016459:myosin complex;GO:0005886:plasma membrane;	GO:0003779:actin binding;GO:0045296:cadherin binding;	K06102	;ko04530 Tight junction;
ENSG00000143942	213.776	2.19179	1.13211	0.127413	8.88533	6.37312e-19	1.96451e-17	2	53767804	53775196	+	CHAC2	ChaC glutathione specific gamma-glutamylcyclotransferase 2 [Source:HGNC Symbol%3BAcc:HGNC:32363]	GO:0006750:glutathione biosynthetic process;GO:0006751:glutathione catabolic process;	GO:0005737:cytoplasm;GO:0005829:cytosol;	GO:0003839:gamma-glutamylcyclotransferase activity;	-	-
ENSG00000159259	504.784	1.38615	0.471082	0.0911709	5.16702	2.37855e-07	2.08695e-06	21	36385392	36419015	+	CHAF1B	chromatin assembly factor 1 subunit B [Source:HGNC Symbol%3BAcc:HGNC:1911]	GO:0007049:cell cycle;GO:0031497:chromatin assembly;GO:0006281:DNA repair;GO:0006260:DNA replication;GO:0006335:DNA replication-... <Preview truncated at 128 characters>	GO:0033186:CAF-1 complex;GO:0000785:chromatin;GO:0005737:cytoplasm;GO:0005654:nucleoplasm;GO:0005634:nucleus;GO:0032991:macromol... <Preview truncated at 128 characters>	GO:0003682:chromatin binding;GO:0042393:histone binding;GO:0051082:unfolded protein binding;	K10751	-
ENSG00000198824	1044.12	1.21155	0.276849	0.0638302	4.33727	1.44265e-05	9.24124e-05	13	114314482	114337626	+	CHAMP1	chromosome alignment maintaining phosphoprotein 1 [Source:HGNC Symbol%3BAcc:HGNC:20311]	GO:0051315:attachment of mitotic spindle microtubules to kinetochore;GO:0034501:protein localization to kinetochore;GO:0035372:p... <Preview truncated at 128 characters>	GO:0000793:condensed chromosome;GO:0005737:cytoplasm;GO:0090543:Flemming body;GO:0000776:kinetochore;GO:0016604:nuclear body;GO:... <Preview truncated at 128 characters>	GO:0046872:metal ion binding;	K09228	;ko05168 Herpes simplex virus 1 infection;
ENSG00000272888	1340.49	0.752843	-0.409579	0.058933	-6.94991	3.65523e-12	5.96672e-11	15	92819540	92899701	+	CHASERR	CHD2 adjacent suppressive regulatory RNA [Source:HGNC Symbol%3BAcc:HGNC:48626]	-	-	-	-	-
ENSG00000250479	290.845	1.28448	0.36118	0.122968	2.93719	0.00331203	0.0123685	22	23765834	23767972	-	CHCHD10	coiled-coil-helix-coiled-coil-helix domain containing 10 [Source:HGNC Symbol%3BAcc:HGNC:15559]	GO:0051457:maintenance of protein location in nucleus;GO:0031930:mitochondria-nucleus signaling pathway;GO:0090144:mitochondrial... <Preview truncated at 128 characters>	GO:0061617:MICOS complex;GO:0005758:mitochondrial intermembrane space;GO:0005739:mitochondrion;GO:0005634:nucleus;	-	-	-
ENSG00000106153	2869.96	1.22709	0.295243	0.045107	6.54539	5.93414e-11	8.36279e-10	7	56101573	56106476	-	CHCHD2	coiled-coil-helix-coiled-coil-helix domain containing 2 [Source:HGNC Symbol%3BAcc:HGNC:21645]	GO:0034599:cellular response to oxidative stress;GO:0007005:mitochondrion organization;GO:0045944:positive regulation of transcr... <Preview truncated at 128 characters>	GO:0005758:mitochondrial intermembrane space;GO:0005739:mitochondrion;GO:0005634:nucleus;	GO:0043565:sequence-specific DNA binding;	K00901	;ko00561 Glycerolipid metabolism;ko00564 Glycerophospholipid metabolism;ko01100 Metabolic pathways;ko04070 Phosphatidylinositol ... <Preview truncated at 128 characters>
ENSG00000106554	1498.86	1.18934	0.250157	0.05589	4.47589	7.60935e-06	5.11682e-05	7	132784870	133082090	-	CHCHD3	coiled-coil-helix-coiled-coil-helix domain containing 3 [Source:HGNC Symbol%3BAcc:HGNC:21906]	GO:0042407:cristae formation;GO:0007007:inner mitochondrial membrane organization;GO:0008053:mitochondrial fusion;GO:0006749:glu... <Preview truncated at 128 characters>	GO:0070062:extracellular exosome;GO:0061617:MICOS complex;GO:0005743:mitochondrial inner membrane;GO:0005739:mitochondrion;GO:00... <Preview truncated at 128 characters>	GO:0060090:binding, bridging;GO:0019902:phosphatase binding;GO:0003746:translation elongation factor activity;	K17563	-
ENSG00000163528	366.188	1.4095	0.495186	0.107316	4.61428	3.94465e-06	2.79355e-05	3	14112077	14124870	-	CHCHD4	coiled-coil-helix-coiled-coil-helix domain containing 4 [Source:HGNC Symbol%3BAcc:HGNC:26467]	GO:0051084:de novo posttranslational protein folding;GO:0033108:mitochondrial respiratory chain complex assembly;GO:0018171:pe... <Preview truncated at 128 characters>	GO:0005758:mitochondrial intermembrane space;GO:0005739:mitochondrion;	GO:0015035:protein disulfide oxidoreductase activity;	K17782	-
ENSG00000153922	1770.5	1.29856	0.376918	0.0657447	5.73305	9.8639e-09	1.06129e-07	5	98853985	98929007	-	CHD1	chromodomain helicase DNA binding protein 1 [Source:HGNC Symbol%3BAcc:HGNC:1915]	GO:0016569:covalent chromatin modification;GO:0043923:positive regulation by host of viral transcription;GO:0006357:regulation o... <Preview truncated at 128 characters>	GO:0005737:cytoplasm;GO:0005654:nucleoplasm;GO:0005634:nucleus;GO:0000775:chromosome, centromeric region;	GO:0005524:ATP binding;GO:0003677:DNA binding;GO:0003678:DNA helicase activity;GO:0035064:methylated histone binding;GO:0070615:... <Preview truncated at 128 characters>	K11367	-
ENSG00000170004	6758.75	0.650296	-0.620831	0.0381722	-16.2639	1.77931e-59	4.57357e-57	17	7884796	7912760	+	CHD3	chromodomain helicase DNA binding protein 3 [Source:HGNC Symbol%3BAcc:HGNC:1918]	GO:0043044:ATP-dependent chromatin remodeling;GO:0007098:centrosome cycle;GO:0006333:chromatin assembly or disassembly;GO:000012... <Preview truncated at 128 characters>	GO:0034451:centriolar satellite;GO:0005813:centrosome;GO:0005737:cytoplasm;GO:0005730:nucleolus;GO:0005654:nucleoplasm;GO:000563... <Preview truncated at 128 characters>	GO:0005524:ATP binding;GO:0003677:DNA binding;GO:0003678:DNA helicase activity;GO:0036121:double-stranded DNA-dependent ATP-depe... <Preview truncated at 128 characters>	K11642	-
ENSG00000111642	693.011	1.18991	0.250848	0.0765576	3.27659	0.00105068	0.00451173	12	6570082	6614524	-	CHD4	chromodomain helicase DNA binding protein 4 [Source:HGNC Symbol%3BAcc:HGNC:1919]	GO:0043044:ATP-dependent chromatin remodeling;GO:0006357:regulation of transcription from RNA polymerase II promoter;GO:0006325:... <Preview truncated at 128 characters>	GO:0005813:centrosome;GO:0000785:chromatin;GO:0005737:cytoplasm;GO:0016020:membrane;GO:0005654:nucleoplasm;GO:0016581:NuRD compl... <Preview truncated at 128 characters>	GO:0005524:ATP binding;GO:0003677:DNA binding;GO:0003678:DNA helicase activity;GO:0042826:histone deacetylase binding;GO:0070615... <Preview truncated at 128 characters>	K11643	;ko05165 Human papillomavirus infection;ko05203 Viral carcinogenesis;
ENSG00000124177	2526.85	0.766693	-0.38328	0.0441888	-8.6737	4.1832e-18	1.20796e-16	20	41402083	41618384	-	CHD6	chromodomain helicase DNA binding protein 6 [Source:HGNC Symbol%3BAcc:HGNC:19057]	GO:0006325:chromatin organization;GO:0036091:positive regulation of transcription from RNA polymerase II promoter in response to... <Preview truncated at 128 characters>	GO:0005654:nucleoplasm;	GO:0005524:ATP binding;GO:0008094:DNA-dependent ATPase activity;GO:0003677:DNA binding;GO:0003678:DNA helicase activity;GO:00706... <Preview truncated at 128 characters>	K14436	-
ENSG00000171316	667.184	1.40757	0.493204	0.0796482	6.19228	5.93002e-10	7.42269e-09	8	60678740	60868028	+	CHD7	chromodomain helicase DNA binding protein 7 [Source:HGNC Symbol%3BAcc:HGNC:20626]	GO:0007512:adult heart development;GO:0007628:adult walking behavior;GO:0035909:aorta morphogenesis;GO:0036302:atrioventricular ... <Preview truncated at 128 characters>	GO:0005730:nucleolus;GO:0005654:nucleoplasm;GO:0005634:nucleus;	GO:0005524:ATP binding;GO:0003682:chromatin binding;GO:0003678:DNA helicase activity;GO:0070615:nucleosome-dependent ATPase acti... <Preview truncated at 128 characters>	K14437	-
ENSG00000177200	2960.72	0.810763	-0.302648	0.0449341	-6.73536	1.6352e-11	2.46224e-10	16	53054991	53329150	+	CHD9	chromodomain helicase DNA binding protein 9 [Source:HGNC Symbol%3BAcc:HGNC:25701]	GO:0006325:chromatin organization;	GO:0005829:cytosol;GO:0005654:nucleoplasm;	GO:0005524:ATP binding;GO:0003677:DNA binding;GO:0003678:DNA helicase activity;GO:0070615:nucleosome-dependent ATPase activity;	K14438	-
ENSG00000149554	2072.9	1.27151	0.346544	0.0529698	6.54231	6.05777e-11	8.51728e-10	11	125625163	125676255	+	CHEK1	checkpoint kinase 1 [Source:HGNC Symbol%3BAcc:HGNC:1925]	GO:0006915:apoptotic process;GO:1902742:apoptotic process involved in development;GO:0006974:cellular response to DNA damage sti... <Preview truncated at 128 characters>	GO:0005813:centrosome;GO:0000785:chromatin;GO:0000794:condensed nuclear chromosome;GO:0005737:cytoplasm;GO:0005829:cytosol;GO:00... <Preview truncated at 128 characters>	GO:0005524:ATP binding;GO:0035402:histone kinase activity (H3-T11 specific);GO:0019904:protein domain specific binding;GO:000467... <Preview truncated at 128 characters>	K02216	;ko04110 Cell cycle;ko04115 p53 signaling pathway;ko04218 Cellular senescence;ko05166 Human T-cell leukemia virus 1 infection;ko... <Preview truncated at 128 characters>
ENSG00000085872	615.503	1.23282	0.301965	0.0883623	3.41735	0.000632341	0.00286145	19	16517894	16542437	-	CHERP	calcium homeostasis endoplasmic reticulum protein [Source:HGNC Symbol%3BAcc:HGNC:16930]	GO:0006874:cellular calcium ion homeostasis;GO:0008285:negative regulation of cell proliferation;GO:0007399:nervous system devel... <Preview truncated at 128 characters>	GO:0005737:cytoplasm;GO:0016020:membrane;GO:0005654:nucleoplasm;GO:0048471:perinuclear region of cytoplasm;GO:0033017:sarcoplasm... <Preview truncated at 128 characters>	GO:0003723:RNA binding;GO:0044325:ion channel binding;	K12841	;ko03040 Spliceosome;
ENSG00000177830	666.38	1.2946	0.372503	0.0736948	5.05467	4.31132e-07	3.59934e-06	11	867859	915058	-	CHID1	chitinase domain containing 1 [Source:HGNC Symbol%3BAcc:HGNC:28474]	GO:0005975:carbohydrate metabolic process;GO:0045087:innate immune response;GO:1900016:negative regulation of cytokine productio... <Preview truncated at 128 characters>	GO:0070062:extracellular exosome;GO:0005576:extracellular region;GO:0005615:extracellular space;GO:0005770:late endosome;GO:0043... <Preview truncated at 128 characters>	GO:0008061:chitin binding;GO:0070492:oligosaccharide binding;	K17525	-
ENSG00000203668	491.234	1.24814	0.319782	0.0848626	3.76823	0.000164412	0.000849259	1	241628851	241640369	-	CHML	CHM like Rab escort protein [Source:HGNC Symbol%3BAcc:HGNC:1941]	GO:0006886:intracellular protein transport;GO:0018344:protein geranylgeranylation;GO:0007264:small GTPase mediated signal transd... <Preview truncated at 128 characters>	GO:0005737:cytoplasm;GO:0005829:cytosol;GO:0005654:nucleoplasm;GO:0005634:nucleus;GO:0005968:Rab-protein geranylgeranyltransfera... <Preview truncated at 128 characters>	GO:0005092:GDP-dissociation inhibitor activity;GO:0005096:GTPase activator activity;GO:0031267:small GTPase binding;	K04256	-
ENSG00000115561	2360.58	0.838299	-0.254464	0.0487238	-5.22258	1.76446e-07	1.57048e-06	2	86503430	86563479	-	CHMP3	charged multivesicular body protein 3 [Source:HGNC Symbol%3BAcc:HGNC:29865]	GO:0006915:apoptotic process;GO:0097352:autophagosome maturation;GO:0032509:endosome transport via multivesicular body sorting p... <Preview truncated at 128 characters>	GO:0031410:cytoplasmic vesicle;GO:0005829:cytosol;GO:0005769:early endosome;GO:0000815:ESCRT III complex;GO:0070062:extracellula... <Preview truncated at 128 characters>	GO:0042802:identical protein binding;GO:0031210:phosphatidylcholine binding;GO:0005546:phosphatidylinositol-4,5-bisphosphate bin... <Preview truncated at 128 characters>	K12193	;ko04144 Endocytosis;ko04217 Necroptosis;
ENSG00000110172	1781.17	1.66725	0.737469	0.0613788	12.015	2.96236e-33	2.23401e-31	11	90200429	90223077	-	CHORDC1	cysteine and histidine rich domain containing 1 [Source:HGNC Symbol%3BAcc:HGNC:14525]	GO:0051298:centrosome duplication;GO:0061077:chaperone-mediated protein folding;GO:2000299:negative regulation of Rho-dependent ... <Preview truncated at 128 characters>	-	GO:0043531:ADP binding;GO:0005524:ATP binding;GO:0051879:Hsp90 protein binding;GO:0008270:zinc ion binding;GO:0046872:metal ion ... <Preview truncated at 128 characters>	K16729	-
ENSG00000123989	431.637	1.30293	0.381763	0.0966938	3.94816	7.87533e-05	0.000437385	2	219538954	219543809	-	CHPF	chondroitin polymerizing factor [Source:HGNC Symbol%3BAcc:HGNC:24291]	GO:0030206:chondroitin sulfate biosynthetic process;	GO:0005829:cytosol;GO:0032580:Golgi cisterna membrane;GO:0000139:Golgi membrane;GO:0016021:integral component of membrane;GO:000... <Preview truncated at 128 characters>	GO:0008376:acetylgalactosaminyltransferase activity;GO:0047238:glucuronosyl-N-acetylgalactosaminyl-proteoglycan 4-beta-N-acetylg... <Preview truncated at 128 characters>	K00747	;ko00532 Glycosaminoglycan biosynthesis - chondroitin sulfate / dermatan sulfate;ko01100 Metabolic pathways;
ENSG00000033100	343.883	1.20093	0.264154	0.100561	2.6268	0.00861924	0.0284132	7	151232483	151240979	+	CHPF2	chondroitin polymerizing factor 2 [Source:HGNC Symbol%3BAcc:HGNC:29270]	GO:0030206:chondroitin sulfate biosynthetic process;	GO:0032580:Golgi cisterna membrane;GO:0000139:Golgi membrane;GO:0016021:integral component of membrane;GO:0016020:membrane;	GO:0008376:acetylgalactosaminyltransferase activity;GO:0047238:glucuronosyl-N-acetylgalactosaminyl-proteoglycan 4-beta-N-acetylg... <Preview truncated at 128 characters>	K03419	;ko00532 Glycosaminoglycan biosynthesis - chondroitin sulfate / dermatan sulfate;ko01100 Metabolic pathways;
ENSG00000111666	234.866	1.48362	0.569119	0.115618	4.92241	8.54858e-07	6.7596e-06	12	101696947	101744140	+	CHPT1	choline phosphotransferase 1 [Source:HGNC Symbol%3BAcc:HGNC:17852]	GO:0006657:CDP-choline pathway;GO:0006629:lipid metabolic process;GO:0006656:phosphatidylcholine biosynthetic process;GO:0006663... <Preview truncated at 128 characters>	GO:0005789:endoplasmic reticulum membrane;GO:0005794:Golgi apparatus;GO:0000139:Golgi membrane;GO:0016021:integral component of ... <Preview truncated at 128 characters>	GO:0019992:diacylglycerol binding;GO:0004142:diacylglycerol cholinephosphotransferase activity;GO:0046872:metal ion binding;	K00994;K09228	;ko00440 Phosphonate and phosphinate metabolism;ko00564 Glycerophospholipid metabolism;ko00565 Ether lipid metabolism;ko01100 Me... <Preview truncated at 128 characters>
ENSG00000104472	999.061	1.1971	0.259543	0.0650454	3.99018	6.60236e-05	0.00037109	8	140511311	140517154	+	CHRAC1	chromatin accessibility complex subunit 1 [Source:HGNC Symbol%3BAcc:HGNC:13544]	GO:0006338:chromatin remodeling;	GO:0008623:CHRAC;GO:0008622:epsilon DNA polymerase complex;GO:0005634:nucleus;	GO:0003677:DNA binding;GO:0003887:DNA-directed DNA polymerase activity;GO:0046982:protein heterodimerization activity;	K11656	-
ENSG00000169684	147.354	1.90882	0.932682	0.16494	5.65468	1.56133e-08	1.63197e-07	15	78565520	78595269	+	CHRNA5	cholinergic receptor nicotinic alpha 5 subunit [Source:HGNC Symbol%3BAcc:HGNC:1959]	GO:0035095:behavioral response to nicotine;GO:0007268:synaptic transmission;GO:0034220:ion transmembrane transport;GO:0050877:ne... <Preview truncated at 128 characters>	GO:0005892:acetylcholine-gated channel complex;GO:0005887:integral component of plasma membrane;GO:0043005:neuron projection;GO:... <Preview truncated at 128 characters>	GO:0015464:acetylcholine receptor activity;GO:0022848:acetylcholine-gated cation channel activity;GO:0015276:ligand-gated ion ch... <Preview truncated at 128 characters>	K04807	;ko04080 Neuroactive ligand-receptor interaction;
ENSG00000223960	220.312	0.739729	-0.434931	0.12344	-3.52342	0.000426017	0.00201107	2	178413635	178440243	+	CHROMR	cholesterol induced regulator of metabolism RNA [Source:HGNC Symbol%3BAcc:HGNC:54059]	-	-	-	-	-
ENSG00000171310	210.802	2.11995	1.08403	0.127533	8.50002	1.89562e-17	5.13279e-16	12	104455295	104762014	+	CHST11	carbohydrate sulfotransferase 11 [Source:HGNC Symbol%3BAcc:HGNC:17422]	GO:0016051:carbohydrate biosynthetic process;GO:0002063:chondrocyte development;GO:0030206:chondroitin sulfate biosynthetic proc... <Preview truncated at 128 characters>	GO:0000139:Golgi membrane;GO:0016021:integral component of membrane;GO:0016020:membrane;	GO:0047756:chondroitin 4-sulfotransferase activity;GO:0001537:N-acetylgalactosamine 4-O-sulfotransferase activity;GO:0050659:N-a... <Preview truncated at 128 characters>	K01017	;ko00532 Glycosaminoglycan biosynthesis - chondroitin sulfate / dermatan sulfate;
ENSG00000122863	603.796	0.75994	-0.396043	0.0745832	-5.31008	1.09577e-07	1.00491e-06	10	71964395	72013558	+	CHST3	carbohydrate sulfotransferase 3 [Source:HGNC Symbol%3BAcc:HGNC:1971]	GO:0005975:carbohydrate metabolic process;GO:0030206:chondroitin sulfate biosynthetic process;GO:0006044:N-acetylglucosamine met... <Preview truncated at 128 characters>	GO:0000139:Golgi membrane;GO:0016021:integral component of membrane;GO:0005802:trans-Golgi network;	GO:0008459:chondroitin 6-sulfotransferase activity;GO:0001517:N-acetylglucosamine 6-O-sulfotransferase activity;	K01020	;ko00532 Glycosaminoglycan biosynthesis - chondroitin sulfate / dermatan sulfate;
ENSG00000131873	926.569	1.42394	0.509889	0.0688356	7.40734	1.28859e-13	2.47025e-12	15	101175727	101252048	-	CHSY1	chondroitin sulfate synthase 1 [Source:HGNC Symbol%3BAcc:HGNC:17198]	GO:0060349:bone morphogenesis;GO:0002063:chondrocyte development;GO:0030206:chondroitin sulfate biosynthetic process;GO:0030279:... <Preview truncated at 128 characters>	GO:0005576:extracellular region;GO:0032580:Golgi cisterna membrane;GO:0000139:Golgi membrane;GO:0016021:integral component of me... <Preview truncated at 128 characters>	GO:0008376:acetylgalactosaminyltransferase activity;GO:0047238:glucuronosyl-N-acetylgalactosaminyl-proteoglycan 4-beta-N-acetylg... <Preview truncated at 128 characters>	K13499	;ko00532 Glycosaminoglycan biosynthesis - chondroitin sulfate / dermatan sulfate;ko01100 Metabolic pathways;
ENSG00000213341	952.375	1.26718	0.341622	0.0628467	5.43581	5.4549e-08	5.2534e-07	10	100188300	100229596	-	CHUK	component of inhibitor of nuclear factor kappa B kinase complex [Source:HGNC Symbol%3BAcc:HGNC:1974]	GO:0009653:anatomical structure morphogenesis;GO:0071276:cellular response to cadmium ion;GO:0034614:cellular response to reacti... <Preview truncated at 128 characters>	GO:0035631:CD40 receptor complex;GO:0005737:cytoplasm;GO:0009898:cytoplasmic side of plasma membrane;GO:0005829:cytosol;GO:00083... <Preview truncated at 128 characters>	GO:0005524:ATP binding;GO:0008384:IkappaB kinase activity;GO:0046982:protein heterodimerization activity;GO:0042803:protein homo... <Preview truncated at 128 characters>	K04467	;ko01523 Antifolate resistance;ko04010 MAPK signaling pathway;ko04014 Ras signaling pathway;ko04062 Chemokine signaling pathway;... <Preview truncated at 128 characters>
ENSG00000005194	1204.86	1.20165	0.265018	0.0556027	4.76627	1.87669e-06	1.4054e-05	16	57428187	57447420	-	CIAPIN1	cytokine induced apoptosis inhibitor 1 [Source:HGNC Symbol%3BAcc:HGNC:28050]	GO:0006915:apoptotic process;GO:0030097:hemopoiesis;GO:0016226:iron-sulfur cluster assembly;GO:0043066:negative regulation of ap... <Preview truncated at 128 characters>	GO:0005737:cytoplasm;GO:0005758:mitochondrial intermembrane space;GO:0005739:mitochondrion;GO:0005730:nucleolus;GO:0005654:nucle... <Preview truncated at 128 characters>	GO:0051537:2 iron, 2 sulfur cluster binding;GO:0051539:4 iron, 4 sulfur cluster binding;GO:0009055:electron carrier activity;GO:... <Preview truncated at 128 characters>	-	-
ENSG00000185043	660.734	1.20614	0.270398	0.0733707	3.68536	0.000228375	0.00114537	15	90229975	90234047	-	CIB1	calcium and integrin binding 1 [Source:HGNC Symbol%3BAcc:HGNC:16920]	GO:0001525:angiogenesis;GO:0006915:apoptotic process;GO:0007155:cell adhesion;GO:0051301:cell division;	GO:0016324:apical plasma membrane;GO:0071944:cell periphery;GO:0005813:centrosome;GO:0005737:cytoplasm;	GO:0005509:calcium ion binding;GO:0008427:calcium-dependent protein kinase inhibitor activity;GO:0008022:protein C-terminus bind... <Preview truncated at 128 characters>	K17259	-
ENSG00000100865	638.36	1.20172	0.2651	0.0765254	3.46421	0.000531793	0.00245205	14	102341102	102362916	-	CINP	cyclin dependent kinase 2 interacting protein [Source:HGNC Symbol%3BAcc:HGNC:23789]	GO:0007049:cell cycle;GO:0051301:cell division;GO:0006281:DNA repair;GO:0006260:DNA replication;	GO:0005634:nucleus;	GO:0046872:metal ion binding;	K13194;K12581;K17985	-;ko03018 RNA degradation;;ko04137 Mitophagy - animal;ko04140 Autophagy - animal;ko05010 Alzheimer disease;ko05014 Amyotrophic l... <Preview truncated at 128 characters>
ENSG00000163507	1759.3	1.2592	0.332511	0.0580933	5.72374	1.04202e-08	1.11535e-07	3	108549864	108589644	-	CIP2A	cellular inhibitor of PP2A [Source:HGNC Symbol%3BAcc:HGNC:29302]	-	GO:0005737:cytoplasm;GO:0005829:cytosol;GO:0016021:integral component of membrane;GO:0005886:plasma membrane;	GO:0045296:cadherin binding;GO:0042803:protein homodimerization activity;	-	-
ENSG00000122873	564.086	1.27354	0.34885	0.0766159	4.55323	5.28292e-06	3.66034e-05	10	58269162	58289586	+	CISD1	CDGSH iron sulfur domain 1 [Source:HGNC Symbol%3BAcc:HGNC:30880]	GO:0043457:regulation of cellular respiration;	GO:0032473:cytoplasmic side of mitochondrial outer membrane;GO:0016021:integral component of membrane;GO:0005741:mitochondrial o... <Preview truncated at 128 characters>	GO:0051537:2 iron, 2 sulfur cluster binding;GO:0042802:identical protein binding;GO:0046872:metal ion binding;	-	-
ENSG00000277972	280.479	1.57818	0.658264	0.120947	5.4426	5.25077e-08	5.06482e-07	17	38730341	38735605	+	CISD3	CDGSH iron sulfur domain 3 [Source:HGNC Symbol%3BAcc:HGNC:27578]	-	GO:0005739:mitochondrion;	GO:0051537:2 iron, 2 sulfur cluster binding;GO:0046872:metal ion binding;	K11460	;ko04550 Signaling pathways regulating pluripotency of stem cells;
ENSG00000122966	1326.57	0.811408	-0.301501	0.0538449	-5.59944	2.15041e-08	2.19984e-07	12	119685791	119877320	-	CIT	citron rho-interacting serine/threonine kinase [Source:HGNC Symbol%3BAcc:HGNC:1985]	GO:0031032:actomyosin structure organization;GO:0048699:generation of neurons;GO:0035556:intracellular signal transduction;GO:00... <Preview truncated at 128 characters>	GO:0005737:cytoplasm;GO:0005856:cytoskeleton;GO:0005829:cytosol;GO:0016020:membrane;GO:0015629:actin cytoskeleton;GO:0032154:cle... <Preview truncated at 128 characters>	GO:0005524:ATP binding;GO:0046872:metal ion binding;GO:0030165:PDZ domain binding;GO:0019901:protein kinase binding;GO:0004674:p... <Preview truncated at 128 characters>	K16308	-
ENSG00000148337	1891.72	0.834663	-0.260734	0.0503195	-5.18157	2.20031e-07	1.94271e-06	9	128161251	128204383	-	CIZ1	CDKN1A interacting zinc finger protein 1 [Source:HGNC Symbol%3BAcc:HGNC:16744]	GO:0051457:maintenance of protein location in nucleus;GO:0032298:positive regulation of DNA-dependent DNA replication initiation... <Preview truncated at 128 characters>	GO:0005654:nucleoplasm;GO:0005634:nucleus;GO:0005886:plasma membrane;	GO:0030332:cyclin binding;GO:0003676:nucleic acid binding;GO:0008270:zinc ion binding;	K00272;K17985	;ko00250 Alanine, aspartate and glutamate metabolism;ko01100 Metabolic pathways;ko04146 Peroxisome;;ko04137 Mitophagy - animal;k... <Preview truncated at 128 characters>
ENSG00000136026	1699.42	1.40088	0.486331	0.0502672	9.67491	3.85413e-22	1.45929e-20	12	106237881	106304279	-	CKAP4	cytoskeleton associated protein 4 [Source:HGNC Symbol%3BAcc:HGNC:16991]	-	GO:0035577:azurophil granule membrane;GO:0036464:cytoplasmic ribonucleoprotein granule;GO:0005856:cytoskeleton;GO:0005829:cytoso... <Preview truncated at 128 characters>	GO:0003723:RNA binding;	K13999	;ko04141 Protein processing in endoplasmic reticulum;
ENSG00000217555	183.587	1.38828	0.473297	0.138436	3.41887	0.000628811	0.00284618	16	66552563	66566251	+	CKLF	chemokine like factor [Source:HGNC Symbol%3BAcc:HGNC:13253]	GO:0048247:lymphocyte chemotaxis;GO:0048246:macrophage chemotaxis;GO:0030593:neutrophil chemotaxis;GO:0032940:secretion by cell;	GO:0005576:extracellular region;GO:0005615:extracellular space;GO:0016021:integral component of membrane;GO:0016020:membrane;	GO:0008009:chemokine activity;	-	-
ENSG00000223572	493.459	0.799107	-0.32354	0.0847199	-3.81893	0.00013403	0.000706948	15	43692886	43699222	+	CKMT1A	creatine kinase%2C mitochondrial 1A [Source:HGNC Symbol%3BAcc:HGNC:31736]	GO:0046314:phosphocreatine biosynthetic process;GO:0043066:negative regulation of apoptotic process;GO:0032091:negative regulati... <Preview truncated at 128 characters>	GO:0005743:mitochondrial inner membrane;GO:0005739:mitochondrion;GO:0044289:contact site;GO:0043209:myelin sheath;GO:0043204:per... <Preview truncated at 128 characters>	GO:0005524:ATP binding;GO:0004111:creatine kinase activity;GO:0016301:kinase activity;GO:0042802:identical protein binding;	K00933	;ko00330 Arginine and proline metabolism;ko01100 Metabolic pathways;
ENSG00000237289	763.312	0.768769	-0.379378	0.0726346	-5.2231	1.75952e-07	1.56801e-06	15	43593054	43604901	+	CKMT1B	creatine kinase%2C mitochondrial 1B [Source:HGNC Symbol%3BAcc:HGNC:1995]	GO:0046314:phosphocreatine biosynthetic process;GO:0043066:negative regulation of apoptotic process;GO:0032091:negative regulati... <Preview truncated at 128 characters>	GO:0005743:mitochondrial inner membrane;GO:0005739:mitochondrion;	GO:0005524:ATP binding;GO:0004111:creatine kinase activity;GO:0016301:kinase activity;	K00933	;ko00330 Arginine and proline metabolism;ko01100 Metabolic pathways;
ENSG00000137975	1379.09	0.716699	-0.480561	0.0654162	-7.34621	2.03909e-13	3.84436e-12	1	86424171	86456553	+	CLCA2	chloride channel accessory 2 [Source:HGNC Symbol%3BAcc:HGNC:2016]	GO:0007155:cell adhesion;GO:0006821:chloride transport;GO:0034220:ion transmembrane transport;	GO:0009925:basal plasma membrane;GO:0030054:cell junction;GO:0005829:cytosol;GO:0005576:extracellular region;GO:0005887:integral... <Preview truncated at 128 characters>	GO:0005254:chloride channel activity;GO:0005229:intracellular calcium activated chloride channel activity;GO:0015276:ligand-gate... <Preview truncated at 128 characters>	K05028	;ko04924 Renin secretion;ko04972 Pancreatic secretion;
ENSG00000114859	100.647	1.6461	0.71905	0.190382	3.77688	0.000158803	0.000823809	3	184346185	184361650	-	CLCN2	chloride voltage-gated channel 2 [Source:HGNC Symbol%3BAcc:HGNC:2020]	GO:0060689:cell differentiation involved in salivary gland development;GO:0006821:chloride transport;GO:0032347:regulation of al... <Preview truncated at 128 characters>	GO:0034707:chloride channel complex;GO:0005887:integral component of plasma membrane;GO:0005886:plasma membrane;	GO:0005247:voltage-gated chloride channel activity;	K05011	;ko04978 Mineral absorption;
ENSG00000163347	7504.18	0.508649	-0.975258	0.0464515	-20.9952	7.25542e-98	7.35619e-95	3	190305707	190322446	-	CLDN1	claudin 1 [Source:HGNC Symbol%3BAcc:HGNC:2032]	GO:0007568:aging;GO:0070830:bicellular tight junction assembly;GO:0016338:calcium-independent cell-cell adhesion via plasma memb... <Preview truncated at 128 characters>	GO:0016324:apical plasma membrane;GO:0016323:basolateral plasma membrane;GO:0005923:bicellular tight junction;GO:0005737:cytopla... <Preview truncated at 128 characters>	GO:0042802:identical protein binding;GO:0005198:structural molecule activity;GO:0001618:virus receptor activity;	K06087	;ko04514 Cell adhesion molecules;ko04530 Tight junction;ko04670 Leukocyte transendothelial migration;ko05130 Pathogenic Escheric... <Preview truncated at 128 characters>
ENSG00000189143	588.411	1.21382	0.279549	0.084122	3.32313	0.000890119	0.0038956	7	73799542	73832690	+	CLDN4	claudin 4 [Source:HGNC Symbol%3BAcc:HGNC:2046]	GO:0070830:bicellular tight junction assembly;GO:0016338:calcium-independent cell-cell adhesion via plasma membrane cell-adhesio... <Preview truncated at 128 characters>	GO:0016324:apical plasma membrane;GO:0016327:apicolateral plasma membrane;GO:0009925:basal plasma membrane;GO:0005923:bicellular... <Preview truncated at 128 characters>	GO:0005254:chloride channel activity;GO:0042802:identical protein binding;GO:0005198:structural molecule activity;GO:0004888:tra... <Preview truncated at 128 characters>	K06087;K01061;K11835	-
ENSG00000110852	781.025	0.621878	-0.685296	0.0808588	-8.47523	2.34624e-17	6.26008e-16	12	9852369	9869386	-	CLEC2B	C-type lectin domain family 2 member B [Source:HGNC Symbol%3BAcc:HGNC:2053]	-	GO:0009897:external side of plasma membrane;GO:0005887:integral component of plasma membrane;GO:0005886:plasma membrane;	GO:0030246:carbohydrate binding;GO:0042802:identical protein binding;	K10071	;ko05167 Kaposi sarcoma-associated herpesvirus infection;
ENSG00000169504	5164.49	1.41558	0.501392	0.0444349	11.2838	1.57864e-29	9.57147e-28	1	24745382	24844321	+	CLIC4	chloride intracellular channel 4 [Source:HGNC Symbol%3BAcc:HGNC:13518]	GO:0001525:angiogenesis;GO:0048754:branching morphogenesis of an epithelial tube;GO:0030154:cell differentiation;GO:0071277:cell... <Preview truncated at 128 characters>	GO:0015629:actin cytoskeleton;GO:0045177:apical part of cell;GO:0009986:cell surface;GO:0005911:cell-cell junction;GO:0005813:ce... <Preview truncated at 128 characters>	GO:0005254:chloride channel activity;GO:0005244:voltage-gated ion channel activity;GO:0044877:macromolecular complex binding;	K05024	-
ENSG00000113282	4443.87	0.690701	-0.533866	0.0404211	-13.2076	7.93061e-40	7.99633e-38	5	157785743	157859145	-	CLINT1	clathrin interactor 1 [Source:HGNC Symbol%3BAcc:HGNC:23186]	GO:0048268:clathrin coat assembly;GO:0006897:endocytosis;	GO:0030125:clathrin vesicle coat;GO:0005829:cytosol;GO:0005768:endosome;GO:0005794:Golgi apparatus;GO:0043231:intracellular memb... <Preview truncated at 128 characters>	GO:0045296:cadherin binding;GO:0030276:clathrin binding;GO:0005543:phospholipid binding;	K12471;K11447	;ko04144 Endocytosis;;ko05202 Transcriptional misregulation in cancer;
ENSG00000013441	1288.92	0.817893	-0.290017	0.0570903	-5.07996	3.77508e-07	3.1837e-06	2	200853009	200864691	-	CLK1	CDC like kinase 1 [Source:HGNC Symbol%3BAcc:HGNC:2068]	GO:0018105:peptidyl-serine phosphorylation;GO:0018107:peptidyl-threonine phosphorylation;GO:0018108:peptidyl-tyrosine phosphoryl... <Preview truncated at 128 characters>	GO:0005737:cytoplasm;GO:0005634:nucleus;	GO:0005524:ATP binding;GO:0004674:protein serine/threonine kinase activity;GO:0004712:protein serine/threonine/tyrosine kinase a... <Preview truncated at 128 characters>	K08823	-
ENSG00000179335	1184.24	0.805771	-0.311557	0.0659089	-4.72709	2.27757e-06	1.67874e-05	15	74598500	74645414	+	CLK3	CDC like kinase 3 [Source:HGNC Symbol%3BAcc:HGNC:2071]	GO:0046777:protein autophosphorylation;GO:0006468:protein phosphorylation;GO:0043484:regulation of RNA splicing;GO:0031087:deade... <Preview truncated at 128 characters>	GO:0001669:acrosomal vesicle;GO:0045111:intermediate filament cytoskeleton;GO:0016020:membrane;GO:0016607:nuclear speck;GO:00056... <Preview truncated at 128 characters>	GO:0005524:ATP binding;GO:0042802:identical protein binding;GO:0004674:protein serine/threonine kinase activity;GO:0004712:prote... <Preview truncated at 128 characters>	K08823;K12615;K09228	-;ko03018 RNA degradation;;ko05168 Herpes simplex virus 1 infection;
ENSG00000113240	530.716	0.660532	-0.598299	0.0825125	-7.251	4.13696e-13	7.48261e-12	5	178602664	178630615	-	CLK4	CDC like kinase 4 [Source:HGNC Symbol%3BAcc:HGNC:13659]	GO:0046777:protein autophosphorylation;GO:0043484:regulation of RNA splicing;	GO:0005634:nucleus;	GO:0005524:ATP binding;GO:0004674:protein serine/threonine kinase activity;GO:0004712:protein serine/threonine/tyrosine kinase a... <Preview truncated at 128 characters>	K08823	-
ENSG00000165959	316.45	0.685338	-0.545112	0.109943	-4.95813	7.1176e-07	5.71726e-06	14	95181940	95319908	-	CLMN	calmin [Source:HGNC Symbol%3BAcc:HGNC:19972]	GO:0008285:negative regulation of cell proliferation;GO:0031175:neuron projection development;GO:0007097:nuclear migration;	GO:0005737:cytoplasm;GO:0016021:integral component of membrane;GO:0034993:LINC complex;GO:0005640:nuclear outer membrane;GO:0016... <Preview truncated at 128 characters>	GO:0051015:actin filament binding;	K15601;K12756	;ko04714 Thermogenesis;;ko04510 Focal adhesion;ko04670 Leukocyte transendothelial migration;ko04810 Regulation of actin cytoskel... <Preview truncated at 128 characters>
ENSG00000125656	294.97	1.25088	0.32294	0.113527	2.84461	0.00444659	0.0160376	19	6361531	6370242	+	CLPP	caseinolytic mitochondrial matrix peptidase proteolytic subunit [Source:HGNC Symbol%3BAcc:HGNC:2084]	GO:0033619:membrane protein proteolysis;GO:0006515:misfolded or incompletely synthesized protein catabolic process;GO:0051603:pr... <Preview truncated at 128 characters>	GO:0009368:endopeptidase Clp complex;GO:0005759:mitochondrial matrix;GO:0005739:mitochondrion;	GO:0004176:ATP-dependent peptidase activity;GO:0051117:ATPase binding;GO:0004175:endopeptidase activity;GO:0042802:identical pro... <Preview truncated at 128 characters>	K01358	;ko04212 Longevity regulating pathway - worm;
ENSG00000092853	1246.8	1.40265	0.488158	0.0696452	7.00921	2.39674e-12	3.9728e-11	1	35720218	35769978	-	CLSPN	claspin [Source:HGNC Symbol%3BAcc:HGNC:19715]	GO:0032147:activation of protein kinase activity;GO:0000077:DNA damage checkpoint;GO:0006281:DNA repair;GO:0000076:DNA replicati... <Preview truncated at 128 characters>	GO:0005694:chromosome;GO:0005794:Golgi apparatus;GO:0005654:nucleoplasm;GO:0005634:nucleus;	GO:0010997:anaphase-promoting complex binding;GO:0000217:DNA secondary structure binding;	K17985;K15696	-
ENSG00000120885	1537.86	0.388271	-1.36487	0.117604	-11.6056	3.85887e-31	2.51516e-29	8	27596917	27614700	-	CLU	clusterin [Source:HGNC Symbol%3BAcc:HGNC:2095]	GO:0000902:cell morphogenesis;GO:0032286:central nervous system myelin maintenance;GO:0051131:chaperone-mediated protein complex... <Preview truncated at 128 characters>	GO:0097440:apical dendrite;GO:0072562:blood microparticle;GO:0009986:cell surface;GO:0042583:chromaffin granule;	GO:0001540:beta-amyloid binding;GO:0051087:chaperone binding;GO:0050750:low-density lipoprotein particle receptor binding;GO:005... <Preview truncated at 128 characters>	K17252	;ko04610 Complement and coagulation cascades;
ENSG00000103351	743.57	0.790591	-0.338997	0.0762556	-4.44554	8.76718e-06	5.83945e-05	16	3500976	3539048	+	CLUAP1	clusterin associated protein 1 [Source:HGNC Symbol%3BAcc:HGNC:19009]	GO:0060271:cilium morphogenesis;GO:0030030:cell projection organization;	GO:0005813:centrosome;GO:0097542:ciliary tip;GO:0005929:cilium;GO:0043231:intracellular membrane-bounded organelle;GO:0030992:in... <Preview truncated at 128 characters>	-	K19684	-
ENSG00000132361	1855.36	1.3709	0.45512	0.0639814	7.11331	1.13291e-12	1.95053e-11	17	2689386	2712663	-	CLUH	clustered mitochondria homolog [Source:HGNC Symbol%3BAcc:HGNC:29094]	GO:0048312:intracellular distribution of mitochondria;GO:0007005:mitochondrion organization;	GO:0005737:cytoplasm;	GO:0003729:mRNA binding;	K03255	-
ENSG00000187118	216.289	1.29232	0.369966	0.128857	2.87113	0.00409002	0.0148809	3	28241584	28325142	+	CMC1	C-X9-C motif containing 1 [Source:HGNC Symbol%3BAcc:HGNC:28783]	GO:0097028:dendritic cell differentiation;GO:0044565:dendritic cell proliferation;GO:0007249:I-kappaB kinase/NF-kappaB signaling... <Preview truncated at 128 characters>	GO:0005739:mitochondrion;GO:0005737:cytoplasm;	GO:0046872:metal ion binding;	K18171;K12651	-;ko04622 RIG-I-like receptor signaling pathway;
ENSG00000103121	505.299	1.33188	0.413463	0.0817618	5.05692	4.26078e-07	3.56041e-06	16	80966448	81020270	-	CMC2	C-X9-C motif containing 2 [Source:HGNC Symbol%3BAcc:HGNC:24447]	-	GO:0005739:mitochondrion;	-	K18172	-
ENSG00000153815	1147.08	0.787171	-0.345251	0.0599572	-5.7583	8.49668e-09	9.22454e-08	16	81444808	81711762	+	CMIP	c-Maf inducing protein [Source:HGNC Symbol%3BAcc:HGNC:24319]	GO:0001701:in utero embryonic development;	GO:0005829:cytosol;GO:0005654:nucleoplasm;GO:0005737:cytoplasm;GO:0005634:nucleus;	-	-	-
ENSG00000184220	934.454	1.66169	0.732651	0.0749309	9.77769	1.40375e-22	5.48573e-21	3	99817837	100181732	+	CMSS1	cms1 ribosomal small subunit homolog [Source:HGNC Symbol%3BAcc:HGNC:28666]	-	-	GO:0003723:RNA binding;	K04613	-
ENSG00000183723	1286.14	1.2135	0.279173	0.0610137	4.57557	4.74921e-06	3.31573e-05	16	66614750	66696743	-	CMTM4	CKLF like MARVEL transmembrane domain containing 4 [Source:HGNC Symbol%3BAcc:HGNC:19175]	-	GO:0016021:integral component of membrane;	-	-	-
ENSG00000153551	173.888	1.71896	0.781535	0.137925	5.66638	1.45847e-08	1.5306e-07	3	32391698	32483067	+	CMTM7	CKLF like MARVEL transmembrane domain containing 7 [Source:HGNC Symbol%3BAcc:HGNC:19178]	GO:0002337:B-1a B cell differentiation;GO:0006935:chemotaxis;	GO:0005615:extracellular space;GO:0016021:integral component of membrane;GO:0016020:membrane;	GO:0005125:cytokine activity;	-	-
ENSG00000180917	1284.17	1.32657	0.407704	0.0555842	7.33488	2.21916e-13	4.15381e-12	16	71281389	71289715	-	CMTR2	cap methyltransferase 2 [Source:HGNC Symbol%3BAcc:HGNC:25635]	GO:0006370:7-methylguanosine mRNA capping;GO:0097309:cap1 mRNA methylation;GO:0097310:cap2 mRNA methylation;	GO:0005737:cytoplasm;GO:0005634:nucleus;	GO:0004483:mRNA (nucleoside-2-O-)-methyltransferase activity;	K14590;K10072	-
ENSG00000169714	7799.95	1.25266	0.325	0.0442144	7.35055	1.97387e-13	3.73297e-12	3	129167827	129183922	-	CNBP	CCHC-type zinc finger nucleic acid binding protein [Source:HGNC Symbol%3BAcc:HGNC:13164]	GO:0042632:cholesterol homeostasis;GO:0071919:G-quadruplex DNA formation;GO:0000122:negative regulation of transcription from RN... <Preview truncated at 128 characters>	GO:0005737:cytoplasm;GO:0005829:cytosol;GO:0005783:endoplasmic reticulum;GO:0005634:nucleus;	GO:0051880:G-quadruplex DNA binding;GO:0003729:mRNA binding;GO:0003723:RNA binding;GO:0003697:single-stranded DNA binding;GO:000... <Preview truncated at 128 characters>	K09250	-
ENSG00000142675	267.805	0.703488	-0.507403	0.128835	-3.93841	8.20241e-05	0.000453756	1	26177484	26189884	+	CNKSR1	connector enhancer of kinase suppressor of Ras 1 [Source:HGNC Symbol%3BAcc:HGNC:19700]	GO:0007265:Ras protein signal transduction;GO:0007266:Rho protein signal transduction;GO:0007169:transmembrane receptor protein ... <Preview truncated at 128 characters>	GO:0005938:cell cortex;GO:0005911:cell-cell junction;GO:0005886:plasma membrane;	GO:0030674:protein binding, bridging;	K17985	;ko04137 Mitophagy - animal;ko04140 Autophagy - animal;ko05010 Alzheimer disease;ko05014 Amyotrophic lateral sclerosis;ko05016 H... <Preview truncated at 128 characters>
ENSG00000182973	627.954	1.28585	0.362721	0.0778571	4.6588	3.18055e-06	2.28614e-05	3	32685145	32773875	+	CNOT10	CCR4-NOT transcription complex subunit 10 [Source:HGNC Symbol%3BAcc:HGNC:23817]	GO:0031047:gene silencing by RNA;GO:0006402:mRNA catabolic process;GO:0017148:negative regulation of translation;GO:0006417:regu... <Preview truncated at 128 characters>	GO:0030014:CCR4-NOT complex;GO:0005829:cytosol;GO:0016020:membrane;GO:0005634:nucleus;GO:0005737:cytoplasm;GO:0070062:extracellu... <Preview truncated at 128 characters>	GO:0042803:protein homodimerization activity;	K12607;K12581	;ko03018 RNA degradation;;ko03018 RNA degradation;
ENSG00000230183	125.461	0.653816	-0.613044	0.164351	-3.73009	0.000191408	0.000976026	15	56005715	56007176	-	CNOT6LP1	CNOT6L pseudogene 1 [Source:HGNC Symbol%3BAcc:HGNC:32355]	GO:0031047:gene silencing by RNA;GO:0006397:mRNA processing;GO:0000289:nuclear-transcribed mRNA poly(A) tail shortening;GO:00082... <Preview truncated at 128 characters>	GO:0030014:CCR4-NOT complex;GO:0005737:cytoplasm;GO:0005829:cytosol;GO:0005634:nucleus;	GO:0000175:3-5-exoribonuclease activity;GO:0046872:metal ion binding;GO:0004535:poly(A)-specific ribonuclease activity;	K12603	;ko03018 RNA degradation;
ENSG00000144580	1731.7	1.26112	0.334702	0.0498017	6.7207	1.80854e-11	2.71207e-10	2	218568580	218597080	+	CNOT9	CCR4-NOT transcription complex subunit 9 [Source:HGNC Symbol%3BAcc:HGNC:10445]	GO:0019221:cytokine-mediated signaling pathway;GO:0031047:gene silencing by RNA;GO:0006402:mRNA catabolic process;GO:0033147:neg... <Preview truncated at 128 characters>	GO:0030014:CCR4-NOT complex;GO:0005634:nucleus;GO:0000932:cytoplasmic mRNA processing body;	GO:0005154:epidermal growth factor receptor binding;GO:0019900:kinase binding;GO:0030374:ligand-dependent nuclear receptor trans... <Preview truncated at 128 characters>	K12606;K09228	;ko03018 RNA degradation;;ko05168 Herpes simplex virus 1 infection;
ENSG00000115649	737.334	0.837073	-0.256575	0.0767843	-3.3415	0.000833269	0.00367234	2	219171897	219178106	-	CNPPD1	cyclin Pas1/PHO80 domain containing 1 [Source:HGNC Symbol%3BAcc:HGNC:25220]	GO:0000079:regulation of cyclin-dependent protein serine/threonine kinase activity;	GO:0000307:cyclin-dependent protein kinase holoenzyme complex;GO:0016021:integral component of membrane;GO:0005634:nucleus;	GO:0016538:cyclin-dependent protein serine/threonine kinase regulator activity;GO:0019901:protein kinase binding;	-	-
ENSG00000257727	339.203	1.23859	0.308703	0.100549	3.07019	0.0021392	0.00847781	12	56309842	56316119	-	CNPY2	canopy FGF signaling regulator 2 [Source:HGNC Symbol%3BAcc:HGNC:13529]	GO:0010629:negative regulation of gene expression;GO:0010988:regulation of low-density lipoprotein particle clearance;GO:0007507... <Preview truncated at 128 characters>	GO:0005783:endoplasmic reticulum;GO:0044666:MLL3/4 complex;	GO:0031490:chromatin DNA binding;GO:0051213:dioxygenase activity;GO:0071558:histone demethylase activity (H3-K27 specific);GO:00... <Preview truncated at 128 characters>	K01647	;ko00020 Citrate cycle (TCA cycle);ko00630 Glyoxylate and dicarboxylate metabolism;ko01100 Metabolic pathways;ko01200 Carbon met... <Preview truncated at 128 characters>
ENSG00000106714	500.871	0.789067	-0.34178	0.0816932	-4.1837	2.86799e-05	0.000173314	9	39064710	39288315	-	CNTNAP3	contactin associated protein family member 3 [Source:HGNC Symbol%3BAcc:HGNC:13834]	GO:0007155:cell adhesion;GO:0008037:cell recognition;GO:2000821:regulation of grooming behavior;GO:0032225:regulation of synapti... <Preview truncated at 128 characters>	GO:0005576:extracellular region;GO:0016021:integral component of membrane;GO:0005886:plasma membrane;GO:0042995:cell projection;... <Preview truncated at 128 characters>	GO:0042803:protein homodimerization activity;	K16467;K02927	-;ko03010 Ribosome;ko04120 Ubiquitin mediated proteolysis;ko04137 Mitophagy - animal;ko05012 Parkinson disease;ko05022 Pathways ... <Preview truncated at 128 characters>
ENSG00000119397	1497.51	0.826609	-0.274723	0.0547435	-5.01836	5.21147e-07	4.27842e-06	9	121074660	121177729	+	CNTRL	centriolin [Source:HGNC Symbol%3BAcc:HGNC:1858]	GO:0035904:aorta development;GO:0007049:cell cycle;GO:0051301:cell division;GO:0060976:coronary vasculature development;GO:00018... <Preview truncated at 128 characters>	GO:0005813:centrosome;GO:0005829:cytosol;GO:0090543:Flemming body;GO:0090619:meiotic spindle pole;GO:0016020:membrane;GO:0005815... <Preview truncated at 128 characters>	GO:0008092:cytoskeletal protein binding;	K16770	-
ENSG00000181924	590.996	1.41454	0.500333	0.0748693	6.68274	2.34509e-11	3.46542e-10	11	73872667	73876901	-	COA4	cytochrome c oxidase assembly factor 4 homolog [Source:HGNC Symbol%3BAcc:HGNC:24604]	GO:0033617:mitochondrial respiratory chain complex IV assembly;	GO:0005758:mitochondrial intermembrane space;GO:0005739:mitochondrion;	-	K18177	;ko04714 Thermogenesis;
ENSG00000168275	456.513	1.29385	0.371674	0.0865043	4.29659	1.73444e-05	0.000109735	1	234373456	234385080	+	COA6	cytochrome c oxidase assembly factor 6 [Source:HGNC Symbol%3BAcc:HGNC:18025]	GO:0042775:mitochondrial ATP synthesis coupled electron transport;GO:0042774:plasma membrane ATP synthesis coupled electron tran... <Preview truncated at 128 characters>	GO:0005758:mitochondrial intermembrane space;GO:0005739:mitochondrion;GO:0005654:nucleoplasm;GO:0005886:plasma membrane;GO:00452... <Preview truncated at 128 characters>	GO:0005507:copper ion binding;GO:0003723:RNA binding;	K18179	;ko04714 Thermogenesis;
ENSG00000162377	985.526	1.37178	0.456047	0.0728095	6.26356	3.7628e-10	4.84623e-09	1	52684449	52698347	-	COA7	cytochrome c oxidase assembly factor 7 [Source:HGNC Symbol%3BAcc:HGNC:25716]	-	GO:0005758:mitochondrial intermembrane space;GO:0005739:mitochondrion;GO:0005654:nucleoplasm;	-	K18180	;ko04714 Thermogenesis;
ENSG00000082438	1936.84	0.821203	-0.284189	0.056531	-5.02713	4.97879e-07	4.10216e-06	2	164653624	164843679	-	COBLL1	cordon-bleu WH2 repeat protein like 1 [Source:HGNC Symbol%3BAcc:HGNC:23571]	-	GO:0070062:extracellular exosome;	GO:0003785:actin monomer binding;GO:0045296:cadherin binding;	K12581;K04482	;ko03018 RNA degradation;;ko03440 Homologous recombination;ko03460 Fanconi anemia pathway;ko05200 Pathways in cancer;ko05212 Pan... <Preview truncated at 128 characters>
ENSG00000197467	171.735	3.27314	1.71068	0.155395	11.0086	3.47392e-28	1.89817e-26	10	69801880	69964275	+	COL13A1	collagen type XIII alpha 1 chain [Source:HGNC Symbol%3BAcc:HGNC:2190]	GO:0030154:cell differentiation;GO:0098609:cell-cell adhesion;GO:0007160:cell-matrix adhesion;GO:0030199:collagen fibril organiz... <Preview truncated at 128 characters>	GO:0005911:cell-cell junction;GO:0005581:collagen trimer;GO:0031012:extracellular matrix;GO:0005615:extracellular space;GO:00160... <Preview truncated at 128 characters>	GO:0005201:extracellular matrix structural constituent;GO:0008201:heparin binding;GO:0001540:beta-amyloid binding;GO:0042802:ide... <Preview truncated at 128 characters>	K16617	;ko04974 Protein digestion and absorption;
ENSG00000187498	1118.38	1.41908	0.504954	0.064785	7.7943	6.47687e-15	1.40051e-13	13	110148963	110307157	-	COL4A1	collagen type IV alpha 1 chain [Source:HGNC Symbol%3BAcc:HGNC:2202]	GO:0071711:basement membrane organization;GO:0007420:brain development;GO:0001569:patterning of blood vessels;GO:0071230:cellula... <Preview truncated at 128 characters>	GO:0005604:basement membrane;GO:0005587:collagen type IV trimer;GO:0031012:extracellular matrix;GO:0005615:extracellular space;G... <Preview truncated at 128 characters>	GO:0005201:extracellular matrix structural constituent;GO:0030020:extracellular matrix structural constituent conferring tensile... <Preview truncated at 128 characters>	K06237;K04482	;ko04151 PI3K-Akt signaling pathway;ko04510 Focal adhesion;ko04512 ECM-receptor interaction;ko04926 Relaxin signaling pathway;ko... <Preview truncated at 128 characters>
ENSG00000134871	2416.4	1.24905	0.320833	0.0462068	6.94343	3.82706e-12	6.21939e-11	13	110305812	110513209	+	COL4A2	collagen type IV alpha 2 chain [Source:HGNC Symbol%3BAcc:HGNC:2203]	GO:0007568:aging;GO:0001525:angiogenesis;GO:0071560:cellular response to transforming growth factor beta stimulus;GO:0038063:col... <Preview truncated at 128 characters>	GO:0005587:collagen type IV trimer;GO:0005788:endoplasmic reticulum lumen;GO:0070062:extracellular exosome;GO:0031012:extracellu... <Preview truncated at 128 characters>	GO:0005201:extracellular matrix structural constituent;GO:0030020:extracellular matrix structural constituent conferring tensile... <Preview truncated at 128 characters>	K06237	;ko04151 PI3K-Akt signaling pathway;ko04510 Focal adhesion;ko04512 ECM-receptor interaction;ko04926 Relaxin signaling pathway;ko... <Preview truncated at 128 characters>
ENSG00000188153	1030.98	0.714574	-0.484845	0.0623447	-7.77684	7.43605e-15	1.59656e-13	X	108439838	108697545	+	COL4A5	collagen type IV alpha 5 chain [Source:HGNC Symbol%3BAcc:HGNC:2207]	GO:0038063:collagen-activated tyrosine kinase receptor signaling pathway;GO:0030198:extracellular matrix organization;GO:0007528... <Preview truncated at 128 characters>	GO:0005604:basement membrane;GO:0005587:collagen type IV trimer;GO:0005788:endoplasmic reticulum lumen;GO:0031012:extracellular ... <Preview truncated at 128 characters>	GO:0005201:extracellular matrix structural constituent;GO:0030020:extracellular matrix structural constituent conferring tensile... <Preview truncated at 128 characters>	K06237	;ko04151 PI3K-Akt signaling pathway;ko04510 Focal adhesion;ko04512 ECM-receptor interaction;ko04926 Relaxin signaling pathway;ko... <Preview truncated at 128 characters>
ENSG00000196167	204.255	0.145533	-2.78058	0.169858	-16.37	3.13169e-60	8.16476e-58	11	111290787	111305498	-	COLCA1	colorectal cancer associated 1 [Source:HGNC Symbol%3BAcc:HGNC:33789]	-	-	-	-	-
ENSG00000214290	171.585	0.34954	-1.51647	0.323618	-4.68599	2.78606e-06	2.02009e-05	11	111298546	111308735	+	COLCA2	colorectal cancer associated 2 [Source:HGNC Symbol%3BAcc:HGNC:26978]	-	GO:0005737:cytoplasm;	-	-	-
ENSG00000130309	1474.06	1.37828	0.462869	0.0578752	7.99772	1.26743e-15	2.92054e-14	19	17555649	17583162	+	COLGALT1	collagen beta(1-O)galactosyltransferase 1 [Source:HGNC Symbol%3BAcc:HGNC:26182]	GO:0030199:collagen fibril organization;GO:1904028:positive regulation of collagen fibril organization;	GO:0005788:endoplasmic reticulum lumen;GO:0016020:membrane;	GO:0050211:procollagen galactosyltransferase activity;	K11703	;ko00310 Lysine degradation;ko00514 Other types of O-glycan biosynthesis;ko01100 Metabolic pathways;
ENSG00000145781	450.847	1.20545	0.269567	0.104855	2.57085	0.0101449	0.0326937	5	116085016	116412762	+	COMMD10	COMM domain containing 10 [Source:HGNC Symbol%3BAcc:HGNC:30201]	-	GO:0005737:cytoplasm;GO:0005654:nucleoplasm;	-	-	-
ENSG00000172301	427.133	1.25957	0.332932	0.101974	3.26486	0.00109519	0.00467824	17	31851871	31859291	-	COPRS	coordinator of PRMT5 and differentiation stimulator [Source:HGNC Symbol%3BAcc:HGNC:28848]	GO:0043985:histone H4-R3 methylation;GO:0007517:muscle organ development;	GO:0005829:cytosol;GO:0005654:nucleoplasm;GO:0005634:nucleus;GO:0005886:plasma membrane;	GO:0042393:histone binding;	-	-
ENSG00000141030	2055.62	1.25649	0.329403	0.0487671	6.75461	1.43221e-11	2.17633e-10	17	17246616	17281273	-	COPS3	COP9 signalosome subunit 3 [Source:HGNC Symbol%3BAcc:HGNC:2239]	GO:0001701:in utero embryonic development;GO:0000338:protein deneddylation;GO:0006511:ubiquitin-dependent protein catabolic proc... <Preview truncated at 128 characters>	GO:0008180:COP9 signalosome;GO:0005829:cytosol;GO:0005654:nucleoplasm;GO:0005737:cytoplasm;	-	K12177	-
ENSG00000005243	237.101	0.629354	-0.668056	0.119322	-5.59876	2.15886e-08	2.20724e-07	17	48026167	48038030	-	COPZ2	COPI coat complex subunit zeta 2 [Source:HGNC Symbol%3BAcc:HGNC:19356]	GO:0006891:intra-Golgi vesicle-mediated transport;GO:0006886:intracellular protein transport;GO:0006890:retrograde vesicle-media... <Preview truncated at 128 characters>	GO:0005801:cis-Golgi network;GO:0030126:COPI vesicle coat;GO:0005829:cytosol;GO:0005789:endoplasmic reticulum membrane;GO:003311... <Preview truncated at 128 characters>	-	-	-
ENSG00000115520	362.948	1.26916	0.343877	0.0982039	3.50166	0.000462361	0.00216584	2	197453493	197475310	+	COQ10B	coenzyme Q10B [Source:HGNC Symbol%3BAcc:HGNC:25819]	GO:0045333:cellular respiration;GO:0006744:ubiquinone biosynthetic process;	GO:0005743:mitochondrial inner membrane;GO:0005739:mitochondrion;	GO:0048039:ubiquinone binding;	K18588	-
ENSG00000132423	434.847	1.29248	0.370147	0.0872537	4.24219	2.21347e-05	0.000136518	6	99369401	99394195	-	COQ3	coenzyme Q3%2C methyltransferase [Source:HGNC Symbol%3BAcc:HGNC:18175]	GO:0006071:glycerol metabolic process;GO:0032259:methylation;GO:0010795:regulation of ubiquinone biosynthetic process;GO:0006744... <Preview truncated at 128 characters>	GO:0031314:extrinsic component of mitochondrial inner membrane;GO:0005759:mitochondrial matrix;GO:0005739:mitochondrion;	GO:0008425:2-polyprenyl-6-methoxy-1,4-benzoquinone methyltransferase activity;GO:0044596:3-demethylubiquinone-10 3-O-methyltrans... <Preview truncated at 128 characters>	K00591	;ko00130 Ubiquinone and other terpenoid-quinone biosynthesis;ko01100 Metabolic pathways;ko01240 Biosynthesis of cofactors;
ENSG00000167186	487.072	0.81547	-0.294296	0.0859511	-3.424	0.000617073	0.00280069	16	19067614	19080095	+	COQ7	coenzyme Q7%2C hydroxylase [Source:HGNC Symbol%3BAcc:HGNC:2244]	GO:0008340:determination of adult lifespan;GO:0000122:negative regulation of transcription from RNA polymerase II promoter;GO:00... <Preview truncated at 128 characters>	GO:0031314:extrinsic component of mitochondrial inner membrane;GO:0005743:mitochondrial inner membrane;GO:0005739:mitochondrion;... <Preview truncated at 128 characters>	GO:0008682:2-octoprenyl-3-methyl-6-methoxy-1,4-benzoquinone hydroxylase activity;GO:0003682:chromatin binding;GO:0046872:metal i... <Preview truncated at 128 characters>	K06134;K10408;K04613	-
ENSG00000123815	180.352	0.719887	-0.474158	0.131894	-3.59499	0.000324407	0.00157425	19	40691514	40725784	-	COQ8B	coenzyme Q8B [Source:HGNC Symbol%3BAcc:HGNC:19041]	GO:0021692:cerebellar Purkinje cell layer morphogenesis;GO:0006468:protein phosphorylation;GO:0006744:ubiquinone biosynthetic pr... <Preview truncated at 128 characters>	GO:0005829:cytosol;GO:0031314:extrinsic component of mitochondrial inner membrane;GO:0016021:integral component of membrane;GO:0... <Preview truncated at 128 characters>	GO:0005524:ATP binding;GO:0016887:ATPase activity;GO:0016301:kinase activity;GO:0008289:lipid binding;	K08869	-
ENSG00000106789	1084.71	0.756167	-0.403224	0.0588426	-6.85259	7.25246e-12	1.142e-10	9	98120975	98192637	-	CORO2A	coronin 2A [Source:HGNC Symbol%3BAcc:HGNC:2255]	GO:0035556:intracellular signal transduction;	GO:0017053:transcriptional repressor complex;	GO:0051015:actin filament binding;	K13887	-
ENSG00000103187	4384.78	1.67231	0.741845	0.0516658	14.3585	9.42103e-47	1.36455e-44	16	84565596	84618078	-	COTL1	coactosin like F-actin binding protein 1 [Source:HGNC Symbol%3BAcc:HGNC:18304]	GO:0050832:defense response to fungus;GO:0030833:regulation of actin filament polymerization;GO:0007507:heart development;GO:007... <Preview truncated at 128 characters>	GO:0030864:cortical actin cytoskeleton;GO:0005829:cytosol;GO:0070062:extracellular exosome;GO:0005576:extracellular region;GO:00... <Preview truncated at 128 characters>	GO:0003779:actin binding;GO:0051015:actin filament binding;GO:0019899:enzyme binding;GO:0031490:chromatin DNA binding;GO:0051213... <Preview truncated at 128 characters>	K17985	;ko04137 Mitophagy - animal;ko04140 Autophagy - animal;ko05010 Alzheimer disease;ko05014 Amyotrophic lateral sclerosis;ko05016 H... <Preview truncated at 128 characters>
ENSG00000197603	426.862	0.705467	-0.50335	0.0893389	-5.63416	1.75909e-08	1.81992e-07	5	37106228	37249376	-	CPLANE1	ciliogenesis and planar polarity effector complex subunit 1 [Source:HGNC Symbol%3BAcc:HGNC:25801]	GO:0060271:cilium morphogenesis;GO:0003279:cardiac septum development;GO:0021549:cerebellum development;GO:0060976:coronary vasc... <Preview truncated at 128 characters>	GO:0035869:ciliary transition zone;GO:0016021:integral component of membrane;	-	K16480;K01025;K17985;K02927;K04613	-
ENSG00000178773	145.94	1.95206	0.964996	0.153566	6.2839	3.30178e-10	4.2827e-09	16	89575758	89597246	+	CPNE7	copine 7 [Source:HGNC Symbol%3BAcc:HGNC:2320]	GO:0071277:cellular response to calcium ion;GO:0006629:lipid metabolic process;	GO:0005737:cytoplasm;GO:0070062:extracellular exosome;GO:0005634:nucleus;GO:0005886:plasma membrane;	GO:0005544:calcium-dependent phospholipid binding;GO:0046872:metal ion binding;GO:0005215:transporter activity;	-	-
ENSG00000021826	147.069	0.710422	-0.493252	0.14873	-3.31642	0.000911773	0.00397797	2	210477682	210679107	+	CPS1	carbamoyl-phosphate synthase 1 [Source:HGNC Symbol%3BAcc:HGNC:2323]	GO:0006207:de novo pyrimidine nucleobase biosynthetic process;GO:0055081:anion homeostasis;GO:0070409:carbamoyl phosphate bios... <Preview truncated at 128 characters>	GO:0005737:cytoplasm;GO:0005743:mitochondrial inner membrane;GO:0005759:mitochondrial matrix;GO:0042645:mitochondrial nucleoid;G... <Preview truncated at 128 characters>	GO:0005524:ATP binding;GO:0005509:calcium ion binding;GO:0004087:carbamoyl-phosphate synthase (ammonia) activity;GO:0004088:carb... <Preview truncated at 128 characters>	K01948	;ko00220 Arginine biosynthesis;ko00250 Alanine, aspartate and glutamate metabolism;ko00910 Nitrogen metabolism;ko01100 Metabolic... <Preview truncated at 128 characters>
ENSG00000165934	3962.68	1.19123	0.252455	0.0492672	5.12421	2.98789e-07	2.57333e-06	14	92121969	92172145	+	CPSF2	cleavage and polyadenylation specific factor 2 [Source:HGNC Symbol%3BAcc:HGNC:2325]	GO:0006398:histone mRNA 3-end processing;GO:0006378:mRNA polyadenylation;GO:0098789:pre-mRNA cleavage required for polyadenylat... <Preview truncated at 128 characters>	GO:0016020:membrane;GO:0005847:mRNA cleavage and polyadenylation specificity factor complex;GO:0005654:nucleoplasm;	GO:0003723:RNA binding;	K14402	;ko03015 mRNA surveillance pathway;
ENSG00000160917	391.066	1.36991	0.454085	0.10475	4.33494	1.45797e-05	9.32026e-05	7	99438922	99457373	+	CPSF4	cleavage and polyadenylation specific factor 4 [Source:HGNC Symbol%3BAcc:HGNC:2327]	GO:0098789:pre-mRNA cleavage required for polyadenylation;	GO:0043231:intracellular membrane-bounded organelle;GO:0005847:mRNA cleavage and polyadenylation specificity factor complex;GO:0... <Preview truncated at 128 characters>	GO:0003723:RNA binding;GO:0008270:zinc ion binding;	K14404	;ko03015 mRNA surveillance pathway;ko05164 Influenza A;
ENSG00000111605	2428.58	1.25748	0.330536	0.0483876	6.831	8.43233e-12	1.32208e-10	12	69239569	69274358	+	CPSF6	cleavage and polyadenylation specific factor 6 [Source:HGNC Symbol%3BAcc:HGNC:13871]	GO:1990120:messenger ribonucleoprotein complex assembly;GO:0006397:mRNA processing;GO:0046833:positive regulation of RNA export ... <Preview truncated at 128 characters>	GO:0005737:cytoplasm;GO:0035061:interchromatin granule;GO:0005849:mRNA cleavage factor complex;GO:0016607:nuclear speck;GO:00056... <Preview truncated at 128 characters>	GO:1990448:exon-exon junction complex binding;GO:0003729:mRNA binding;GO:0043023:ribosomal large subunit binding;	K14398	;ko03015 mRNA surveillance pathway;
ENSG00000143320	1056.46	0.2541	-1.97653	0.0748578	-26.4038	1.23991e-153	3.23263e-150	1	156699606	156705816	-	CRABP2	cellular retinoic acid binding protein 2 [Source:HGNC Symbol%3BAcc:HGNC:2339]	GO:0035115:embryonic forelimb morphogenesis;GO:0008544:epidermis development;GO:0048672:positive regulation of collateral sprout... <Preview truncated at 128 characters>	GO:0005737:cytoplasm;GO:0005829:cytosol;GO:0005783:endoplasmic reticulum;GO:0070062:extracellular exosome;GO:0005654:nucleoplasm... <Preview truncated at 128 characters>	GO:0030332:cyclin binding;GO:0016918:retinal binding;GO:0001972:retinoic acid binding;GO:0005501:retinoid binding;GO:0019841:ret... <Preview truncated at 128 characters>	K17289	-
ENSG00000196872	171.551	0.748295	-0.418322	0.134531	-3.10948	0.00187415	0.0075437	2	98793846	98936259	-	CRACDL	CRACD like [Source:HGNC Symbol%3BAcc:HGNC:33454]	-	-	-	-	-
ENSG00000107175	350.376	0.808074	-0.30744	0.107174	-2.86861	0.00412284	0.0149795	9	35732598	35736999	+	CREB3	cAMP responsive element binding protein 3 [Source:HGNC Symbol%3BAcc:HGNC:2347]	GO:0006935:chemotaxis;GO:0042994:cytoplasmic sequestering of transcription factor;GO:0019043:establishment of viral latency;GO:0... <Preview truncated at 128 characters>	GO:0000785:chromatin;GO:0005737:cytoplasm;GO:0005829:cytosol;GO:0005783:endoplasmic reticulum;GO:0005789:endoplasmic reticulum m... <Preview truncated at 128 characters>	GO:0035497:cAMP response element binding;GO:0008140:cAMP response element binding protein binding;GO:0031726:CCR1 chemokine rece... <Preview truncated at 128 characters>	K09048	;ko04022 cGMP-PKG signaling pathway;ko04024 cAMP signaling pathway;ko04151 PI3K-Akt signaling pathway;ko04152 AMPK signaling pat... <Preview truncated at 128 characters>
ENSG00000111269	660.005	0.83604	-0.258356	0.0785121	-3.29066	0.000999534	0.0043216	12	12611827	12645108	+	CREBL2	cAMP responsive element binding protein like 2 [Source:HGNC Symbol%3BAcc:HGNC:2350]	GO:0007049:cell cycle;GO:0030154:cell differentiation;GO:0045600:positive regulation of fat cell differentiation;GO:0046326:posi... <Preview truncated at 128 characters>	GO:0000785:chromatin;GO:0005634:nucleus;	GO:0003677:DNA binding;GO:0003700:sequence-specific DNA binding transcription factor activity;GO:0000981:sequence-specific DNA b... <Preview truncated at 128 characters>	-	-
ENSG00000164463	329.562	0.577847	-0.791241	0.102125	-7.74774	9.35439e-15	1.98278e-13	5	173056352	173139284	+	CREBRF	CREB3 regulatory factor [Source:HGNC Symbol%3BAcc:HGNC:24050]	GO:1900102:negative regulation of endoplasmic reticulum unfolded protein response;GO:0000122:negative regulation of transcriptio... <Preview truncated at 128 characters>	GO:0005737:cytoplasm;GO:0016604:nuclear body;GO:0005654:nucleoplasm;GO:0005634:nucleus;GO:0016021:integral component of membrane... <Preview truncated at 128 characters>	GO:0001228:RNA polymerase II transcription regulatory region sequence-specific DNA binding transcription factor activity involve... <Preview truncated at 128 characters>	K15201;K17985;K12581	-;ko04137 Mitophagy - animal;ko04140 Autophagy - animal;ko05010 Alzheimer disease;ko05014 Amyotrophic lateral sclerosis;ko05016 ... <Preview truncated at 128 characters>
ENSG00000137504	2907.25	0.834356	-0.261265	0.0469718	-5.56216	2.66449e-08	2.7e-07	11	85657742	85682908	-	CREBZF	CREB/ATF bZIP transcription factor [Source:HGNC Symbol%3BAcc:HGNC:24905]	GO:0045814:negative regulation of gene expression, epigenetic;GO:0045892:negative regulation of transcription, DNA-templated;GO:... <Preview truncated at 128 characters>	GO:0000785:chromatin;GO:0005739:mitochondrion;GO:0005654:nucleoplasm;GO:0005634:nucleus;	GO:0003677:DNA binding;GO:0000981:sequence-specific DNA binding RNA polymerase II transcription factor activity;GO:0042802:ident... <Preview truncated at 128 characters>	-	-
ENSG00000143162	4777.81	0.727872	-0.458244	0.0526933	-8.69644	3.42445e-18	9.95161e-17	1	167529117	167553805	-	CREG1	cellular repressor of E1A stimulated genes 1 [Source:HGNC Symbol%3BAcc:HGNC:2351]	GO:0040008:regulation of growth;GO:0006355:regulation of transcription, DNA-templated;	GO:0005615:extracellular space;GO:0005667:transcription factor complex;	-	K12581	;ko03018 RNA degradation;
ENSG00000184164	221.43	1.23135	0.300238	0.122312	2.45469	0.0141005	0.0433805	22	49918167	49927540	+	CRELD2	cysteine rich with EGF like domains 2 [Source:HGNC Symbol%3BAcc:HGNC:28150]	-	GO:0005783:endoplasmic reticulum;GO:0005615:extracellular space;GO:0005794:Golgi apparatus;	GO:0005509:calcium ion binding;GO:0003756:protein disulfide isomerase activity;	K16467	-
ENSG00000182809	553.513	0.771376	-0.374493	0.0906121	-4.13292	3.58179e-05	0.000212993	14	105472962	105480162	+	CRIP2	cysteine rich protein 2 [Source:HGNC Symbol%3BAcc:HGNC:2361]	GO:0030097:hemopoiesis;GO:0008284:positive regulation of cell proliferation;	GO:0005938:cell cortex;	GO:0008270:zinc ion binding;	-	-
ENSG00000176390	686.04	1.21412	0.279909	0.0799385	3.50155	0.000462553	0.00216618	17	30769388	30824692	-	CRLF3	cytokine receptor like factor 3 [Source:HGNC Symbol%3BAcc:HGNC:17177]	GO:0000082:G1/S transition of mitotic cell cycle;GO:0030308:negative regulation of cell growth;GO:0046427:positive regulation of... <Preview truncated at 128 characters>	GO:0005737:cytoplasm;GO:0005829:cytosol;GO:0005634:nucleus;GO:0005886:plasma membrane;	GO:0003677:DNA binding;GO:0042802:identical protein binding;GO:0046872:metal ion binding;	K12581;K17985;K04257	;ko03018 RNA degradation;;ko04137 Mitophagy - animal;ko04140 Autophagy - animal;ko05010 Alzheimer disease;ko05014 Amyotrophic la... <Preview truncated at 128 characters>
ENSG00000088766	213.42	1.24722	0.318719	0.126115	2.5272	0.0114977	0.0364188	20	6006093	6040053	+	CRLS1	cardiolipin synthase 1 [Source:HGNC Symbol%3BAcc:HGNC:16148]	GO:0032049:cardiolipin biosynthetic process;GO:0046474:glycerophospholipid biosynthetic process;GO:0036148:phosphatidylglycerol ... <Preview truncated at 128 characters>	GO:0016021:integral component of membrane;GO:0005743:mitochondrial inner membrane;GO:0005739:mitochondrion;GO:0031966:mitochondr... <Preview truncated at 128 characters>	GO:0003841:1-acylglycerol-3-phosphate O-acyltransferase activity;GO:0047144:2-acylglycerol-3-phosphate O-acyltransferase activit... <Preview truncated at 128 characters>	K08744	;ko00564 Glycerophospholipid metabolism;ko01100 Metabolic pathways;
ENSG00000058453	273.692	0.682579	-0.550931	0.128318	-4.29349	1.75889e-05	0.000111072	1	16740273	16972964	+	CROCC	ciliary rootlet coiled-coil%2C rootletin [Source:HGNC Symbol%3BAcc:HGNC:21299]	GO:0010457:centriole-centriole cohesion;GO:0007098:centrosome cycle;GO:0032053:ciliary basal body organization;GO:0010669:epithe... <Preview truncated at 128 characters>	GO:0015629:actin cytoskeleton;GO:0005814:centriole;GO:0005813:centrosome;GO:0035253:ciliary rootlet;GO:0005829:cytosol;GO:007006... <Preview truncated at 128 characters>	GO:0003779:actin binding;GO:0019894:kinesin binding;GO:0005200:structural constituent of cytoskeleton;GO:0005198:structural mole... <Preview truncated at 128 characters>	K16469	-
ENSG00000005469	797.941	0.689949	-0.535438	0.0760844	-7.03743	1.95825e-12	3.27571e-11	7	87345664	87399794	+	CROT	carnitine O-octanoyltransferase [Source:HGNC Symbol%3BAcc:HGNC:2366]	GO:0009437:carnitine metabolic process;GO:0015936:coenzyme A metabolic process;GO:0006635:fatty acid beta-oxidation;GO:0033540:f... <Preview truncated at 128 characters>	GO:0005829:cytosol;GO:0043231:intracellular membrane-bounded organelle;GO:0005782:peroxisomal matrix;GO:0005777:peroxisome;	GO:0008458:carnitine O-octanoyltransferase activity;	K05940	;ko04146 Peroxisome;
ENSG00000008405	494.192	1.41906	0.504936	0.0883805	5.7132	1.10869e-08	1.18256e-07	12	106991364	107093549	-	CRY1	cryptochrome circadian regulator 1 [Source:HGNC Symbol%3BAcc:HGNC:2384]	GO:0009785:blue light signaling pathway;GO:0032922:circadian regulation of gene expression;GO:0007623:circadian rhythm;GO:000697... <Preview truncated at 128 characters>	GO:0005737:cytoplasm;GO:0005739:mitochondrion;GO:0005634:nucleus;	GO:0009882:blue light photoreceptor activity;GO:0003677:DNA binding;GO:0003690:double-stranded DNA binding;GO:0070888:E-box bind... <Preview truncated at 128 characters>	K02295	;ko04710 Circadian rhythm;
ENSG00000176092	203.871	0.720501	-0.472928	0.140316	-3.37045	0.000750464	0.00333967	1	26321698	26360080	-	CRYBG2	crystallin beta-gamma domain containing 2 [Source:HGNC Symbol%3BAcc:HGNC:17295]	-	-	GO:0030246:carbohydrate binding;	-	-
ENSG00000080200	1782.94	0.761429	-0.393218	0.0586188	-6.70805	1.97236e-11	2.94563e-10	3	97822011	97944984	+	CRYBG3	crystallin beta-gamma domain containing 3 [Source:HGNC Symbol%3BAcc:HGNC:34427]	GO:0002088:lens development in camera-type eye;GO:0007601:visual perception;	GO:0032991:macromolecular complex;	GO:0030246:carbohydrate binding;GO:0051018:protein kinase A binding;GO:0005212:structural constituent of eye lens;	-	-
ENSG00000124207	11551.9	1.34502	0.42763	0.0438273	9.75715	1.7192e-22	6.66145e-21	20	49046246	49096960	+	CSE1L	chromosome segregation 1 like [Source:HGNC Symbol%3BAcc:HGNC:2431]	GO:0006611:protein export from nucleus;GO:0006606:protein import into nucleus;GO:0006886:intracellular protein transport;	GO:0005737:cytoplasm;GO:0005829:cytosol;GO:0070062:extracellular exosome;GO:0016020:membrane;GO:0005635:nuclear envelope;GO:0005... <Preview truncated at 128 characters>	GO:0005049:nuclear export signal receptor activity;GO:0031267:small GTPase binding;	K18423	;ko05132 Salmonella infection;
ENSG00000184371	142.005	0.459338	-1.12237	0.152767	-7.34696	2.02759e-13	3.82663e-12	1	109910242	109930992	+	CSF1	colony stimulating factor 1 [Source:HGNC Symbol%3BAcc:HGNC:2432]	GO:0060444:branching involved in mammary gland duct morphogenesis;GO:0003006:developmental process involved in reproduction;GO:0... <Preview truncated at 128 characters>	GO:1990682:CSF1-CSF1R complex;GO:0005788:endoplasmic reticulum lumen;GO:0005576:extracellular region;GO:0005615:extracellular sp... <Preview truncated at 128 characters>	GO:0005125:cytokine activity;GO:0008083:growth factor activity;GO:0042802:identical protein binding;GO:0005157:macrophage colony... <Preview truncated at 128 characters>	K05453	;ko04010 MAPK signaling pathway;ko04014 Ras signaling pathway;ko04015 Rap1 signaling pathway;ko04060 Cytokine-cytokine receptor ... <Preview truncated at 128 characters>
[truncated: 2,921 more rows]
