# Supplementary material for: Production of recombinant human epidermal growth factor fused with HaloTag protein and characterisation of its biological functions
Source: PeerJ. 2024 Jul 16;12:e17806. doi: 10.7717/peerj.17806 (PMC11259126; doi:10.7717/peerj.17806)
Supplement: Supplemental Information 3 [file peerj-12-17806-s003.xlsx]

## Sheet: Figure 1
CON	Halo-rhEGF	rhEGF
0.57212	17.3263	21.4329
0.525301	19.2613	20.598
1.90258	21.6248	22.7911

## Sheet: Figure 2
Figure 2A
CON	0.761311	1.22459	1.0141	0.926685	1.10598	0.967338
0.31	0.844918	1.06721	1.08098	1.01737	0.973593	1.10181
1.25	1.47836	1.35541	1.18623	1.03822	1.33947	1.02363
5	1.72229	2.03803	1.86885	1.51668	1.54795	1.36345
20	2.10197	2.2377	2.51607	1.9107	1.63343	1.7335
80	2.49246	2.23475	2.45115	1.87109	1.73037	1.72835
Figure 2B
CON	1.06516	0.909574	1.02527	1.06084	0.86948	1.07066
0.31	1.22207	0.918883	1.05186	1.14917	0.902846	1.02748
1.25	1.52128	1.0984	1.20745	1.28165	1.35231	1.17076
5	1.64761	1.77793	1.39894	1.32483	1.47007	1.59764
20	1.76596	2.03856	1.65293	1.55152	1.32875	1.60059
80	2.08644	1.81117	1.69947	1.68204	1.62316	1.55054

## Sheet: Figure 3
	Figure 3B	NIH 3T3
CON	FGF2	Halo-rhEGF	FGF2+U	Halo-rhEGF+U
0.448437	3.17522	2.61286	1.34716	0.100999
2.00626	3.91367	3.34225	1.84604	0.450725
0.545302	3.17688	2.42252	1.13309	0.356193
	Figure 3B	HaCaT
CON	FGF2	Halo-rhEGF	FGF2+U	Halo-rhEGF+U
1	5.02677	8.2281	0.719182	0.717833
1	3.34619	4.90015	0.070453	0.229227
1	3.00173	3.429	0.419612	0.487652
	Figure 3B	HaCaT
CON	Halo-rhEGF	Halo-rhEGF+SP
0.844146	1.55142	0.824423
1.02989	1.72985	0.956565
1.12596	1.48622	0.724833
	Figure 3C
CON	FGF2	Halo-rhEGF	FGF2+U	Halo-rhEGF+U			CON	FGF2	Halo-rhEGF	FGF2+U	Halo-rhEGF+U
0.996084	2.18449	1.52506	1.63668	1.00838			0.990783	2.85603	3.31326	2.00135	2.8175
0.888927	1.8653	1.3545	1.91358	0.409527			0.923559	1.62449	2.15786	1.27781	1.54965
1.11499	2.14015	1.50906	1.95894	1.11322			1.08572	1.92915	3.10243	1.10624	1.87366

## Sheet: Figure 5
Figure 5B
	c-Jun			CCND1			PCNA			HMGA1			Integrin alpha-1			MCM2
CON	0.940493	0.956416	1.10309	0.901663	1.07833	1.02	1.0225	1.05245	0.925048	0.697977	1.08452	1.2175	0.667426	1.27111	1.06146	1.01415	1.02019	0.965652
Halo-rhEGF	2.80434	3.03214	3.28857	1.78709	1.63477	1.63169	1.35179	1.6877	2.34792	3.12157	3.50401	4.74952	1.88132	2.04544	2.54782	1.11049	1.27026	1.44225

## Sheet: Figure 6
Figure 6A
CON	UVB	UVB+Halo-rhEGF
1.00526	14.8992	1.35057
0.95355	17.2077	2.37102
1.04119	14.7228	1.44552
Figure 6B
CON	UVB	UVB+Halo-rhEGF
1.04078	0.595791	1.3329
1.00941	0.292526	0.693207
0.949835	0.546803	0.884483

## Sheet: Figure 7
Figure 7D
CON	Halo-rhEGF	Q Sepharose + Halo-rhEGF
1.03086	2.44971	4.5845
1.0578	2.50367	4.27247
0.911332	2.86407	5.70582
