# Supplementary material for: Production of recombinant human epidermal growth factor fused with HaloTag protein and characterisation of its biological functions
Source: PeerJ journal article supplement (doi:10.7717/peerj.17806), 2024-07-16
Supplement: Uncropped_Gel_Images.pdf [file Uncropped_Gel_Images.pdf]

# Uncropped gel images for Figure 1

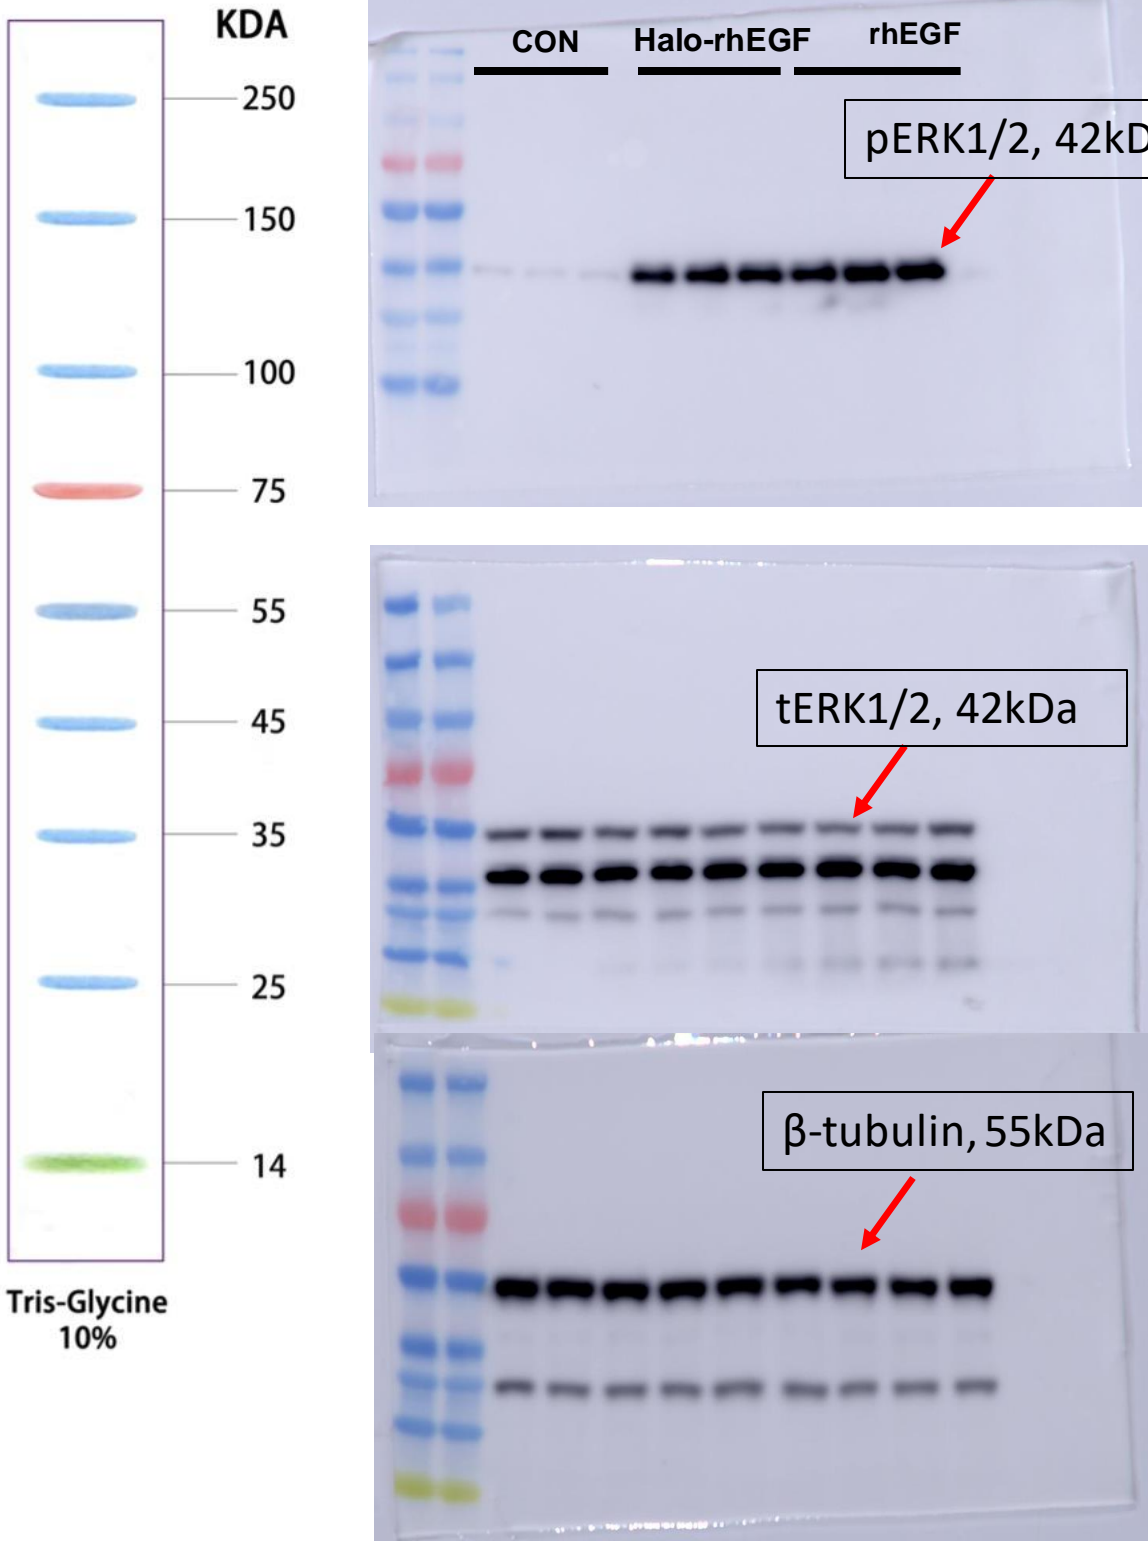

# Uncropped gel images for Figure 3

|            |   |   |   |   |   |
|------------|---|---|---|---|---|
| Halo-rhEGF | - | - | + | - | + |
| FGF2       | - | + | - | + | - |
| U0216      | - | - | - | + | + |

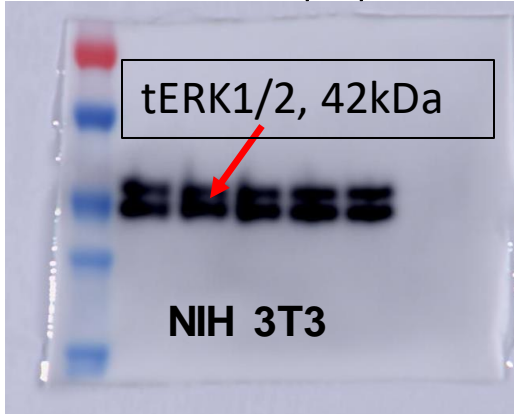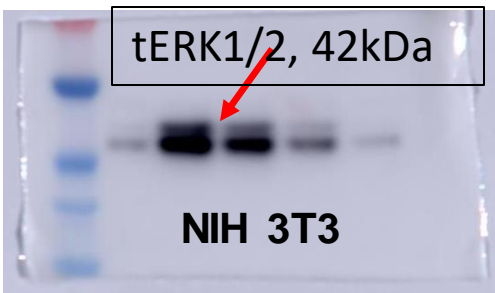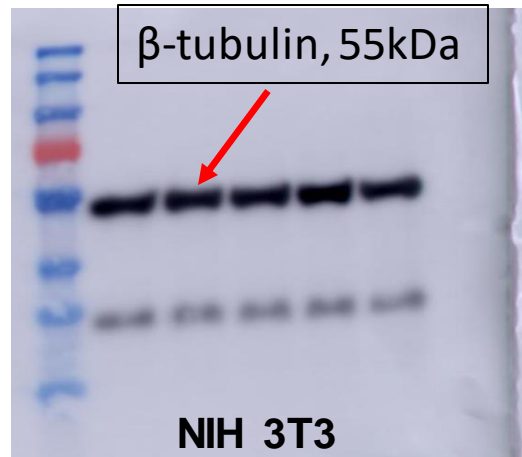

|   |   |   |   |   |            |
|---|---|---|---|---|------------|
| - | - | + | - | + | Halo-rhEGF |
| - | + | - | + | - | FGF2       |
| - | - | - | + | + | U0216      |

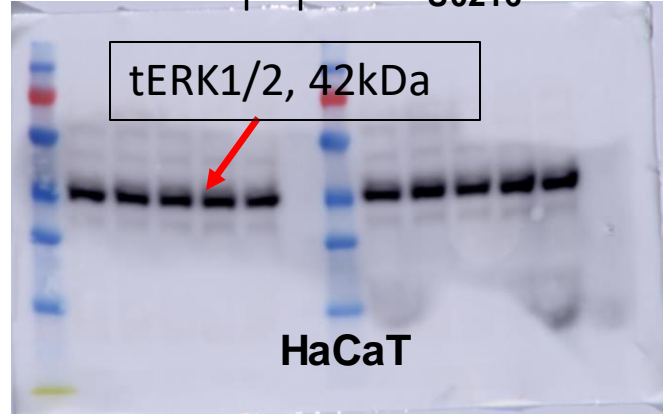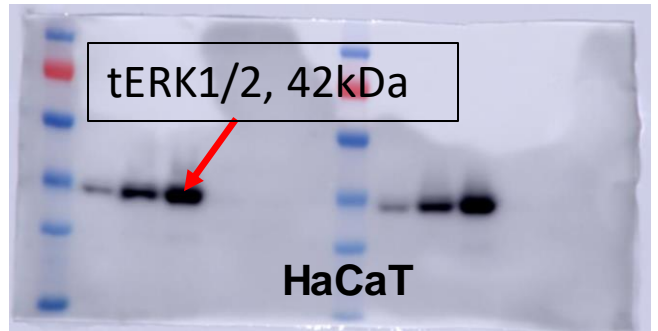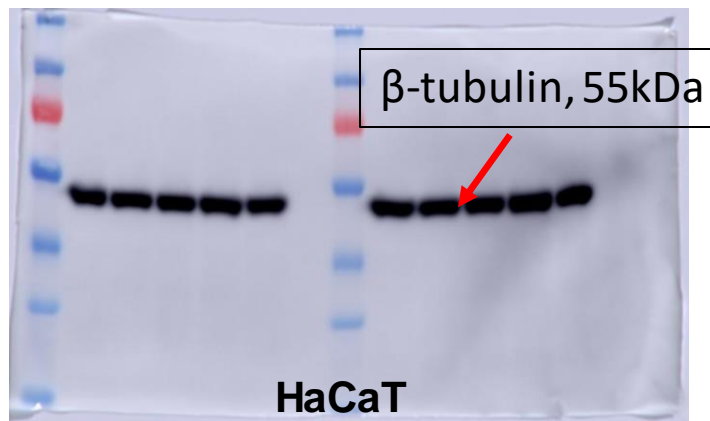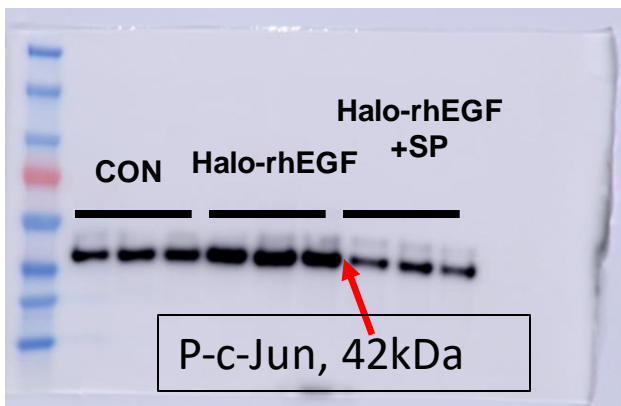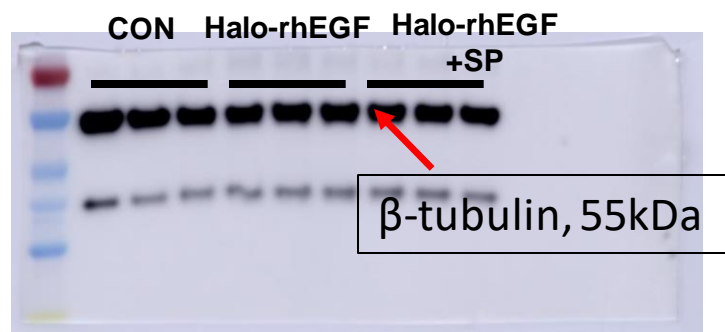

Uncropped gel images for **Figure 5**

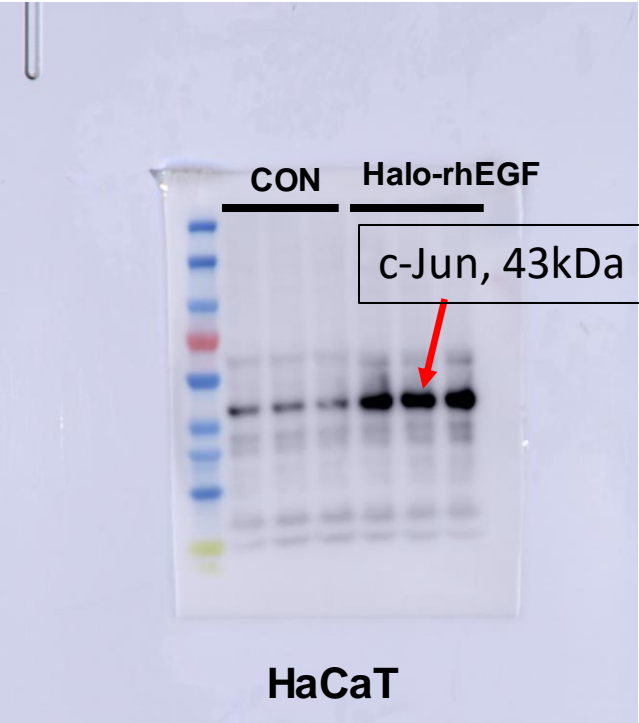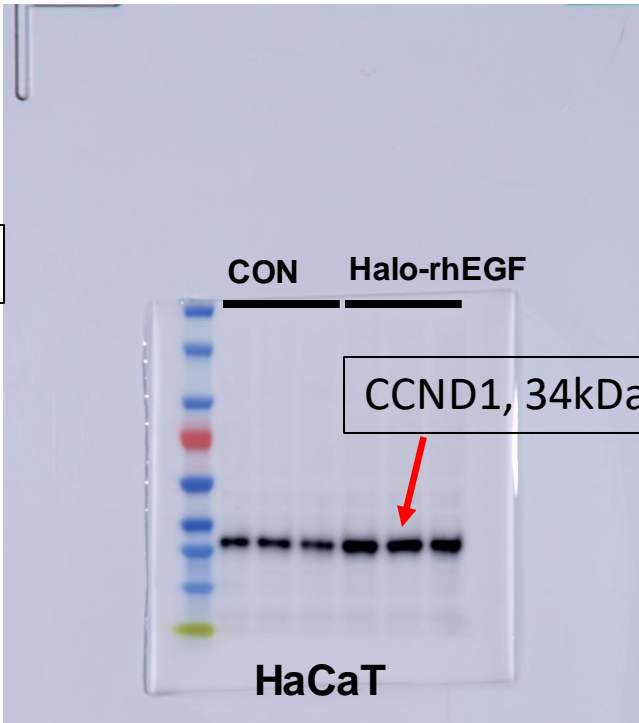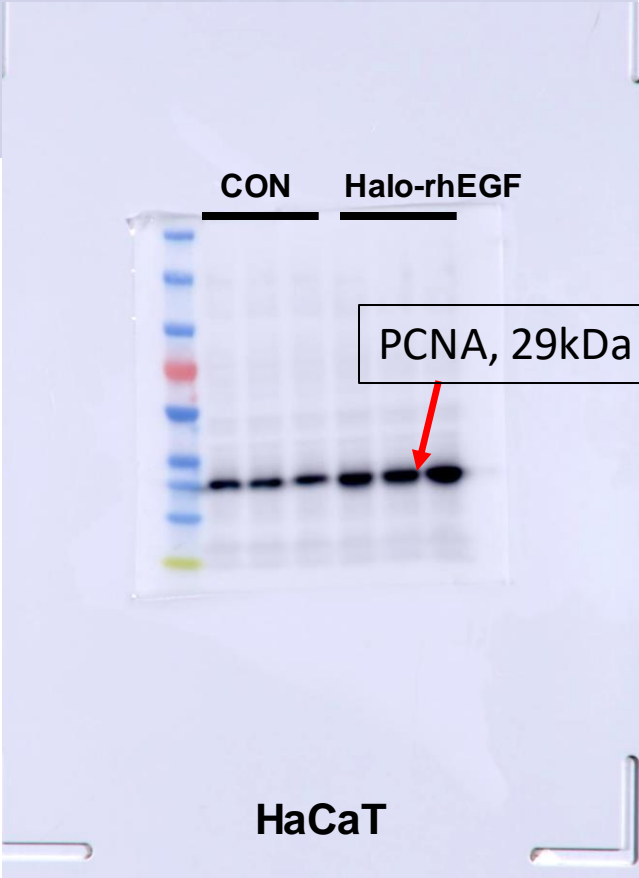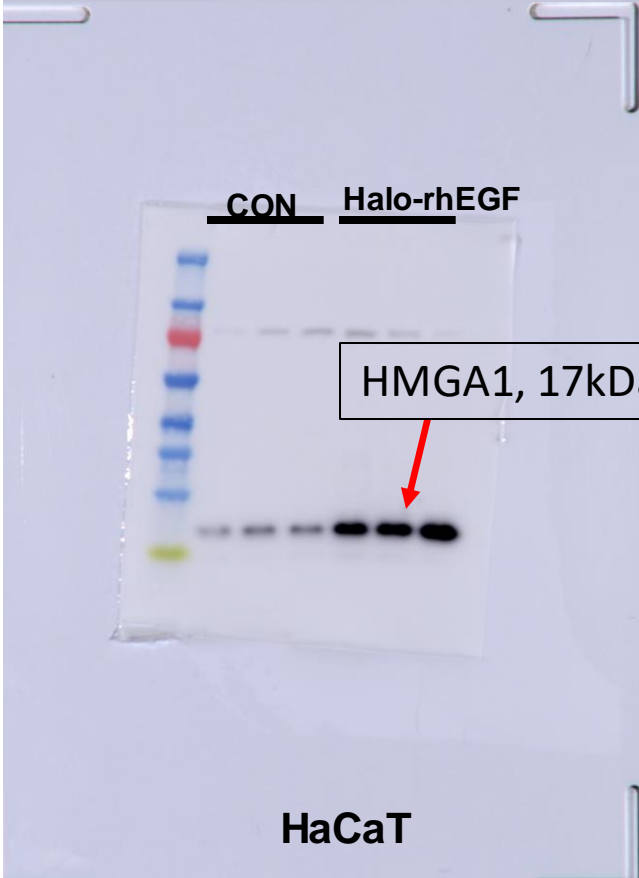

Uncropped gel images for **Figure 5**

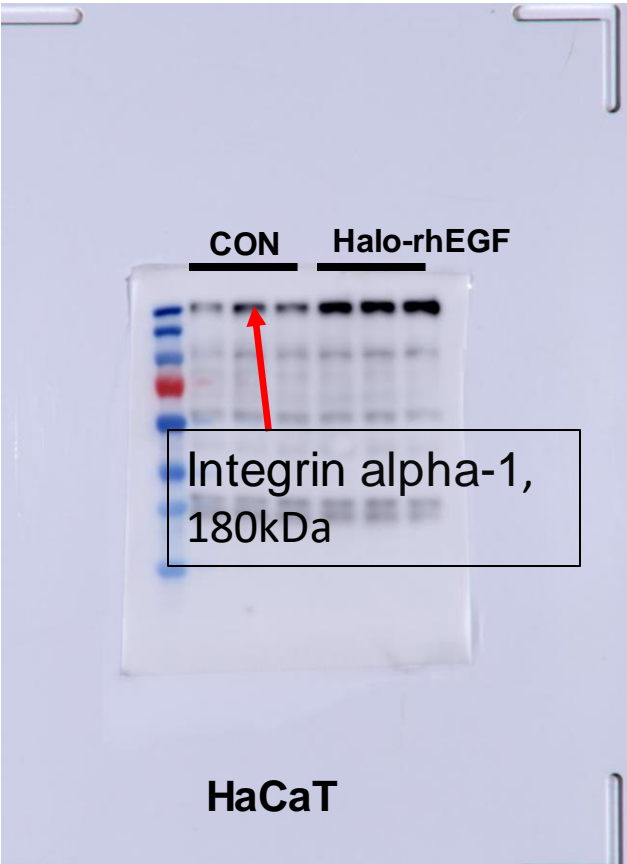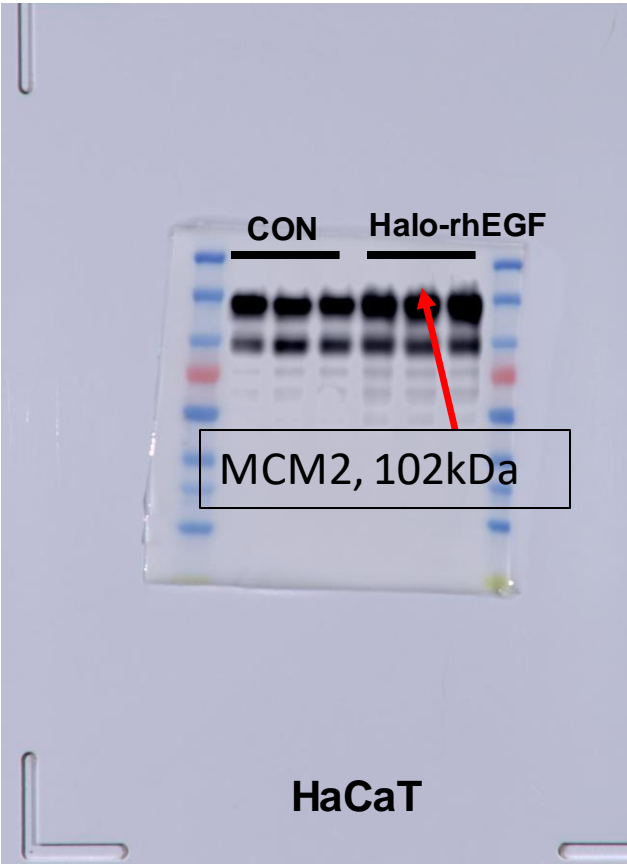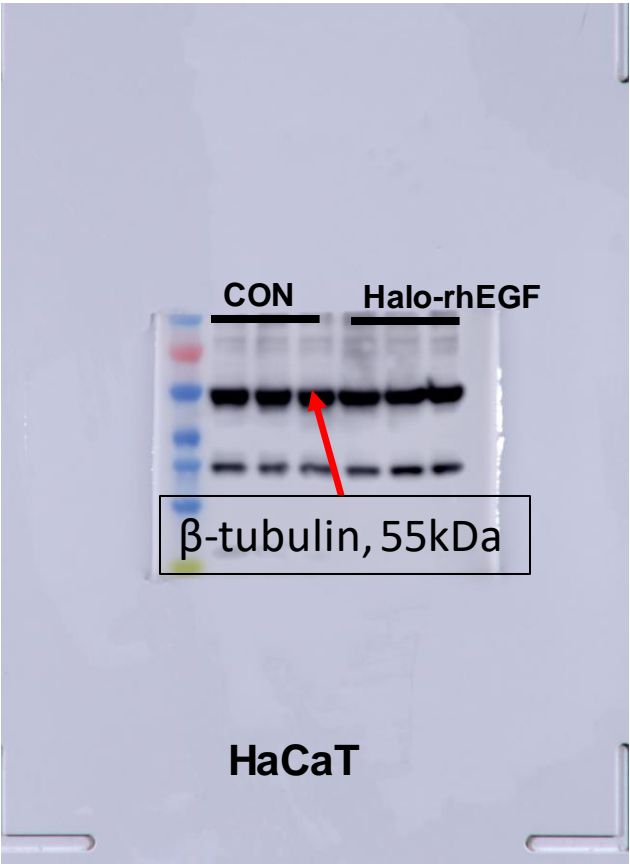

Uncropped gel images for **Figure 7**

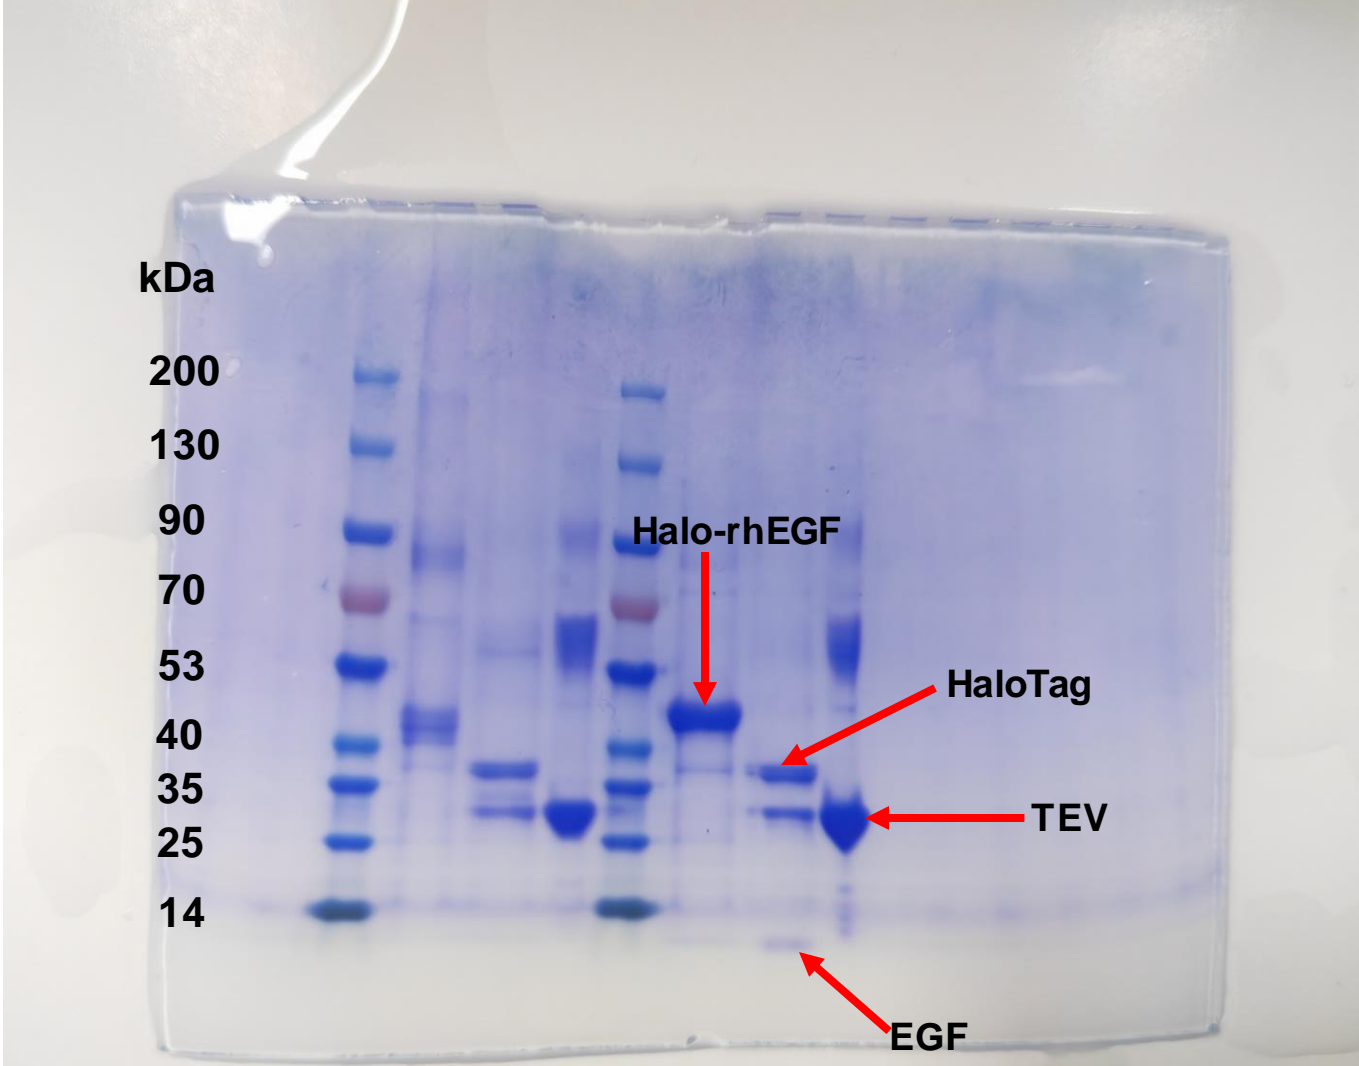

Coomassie Blue

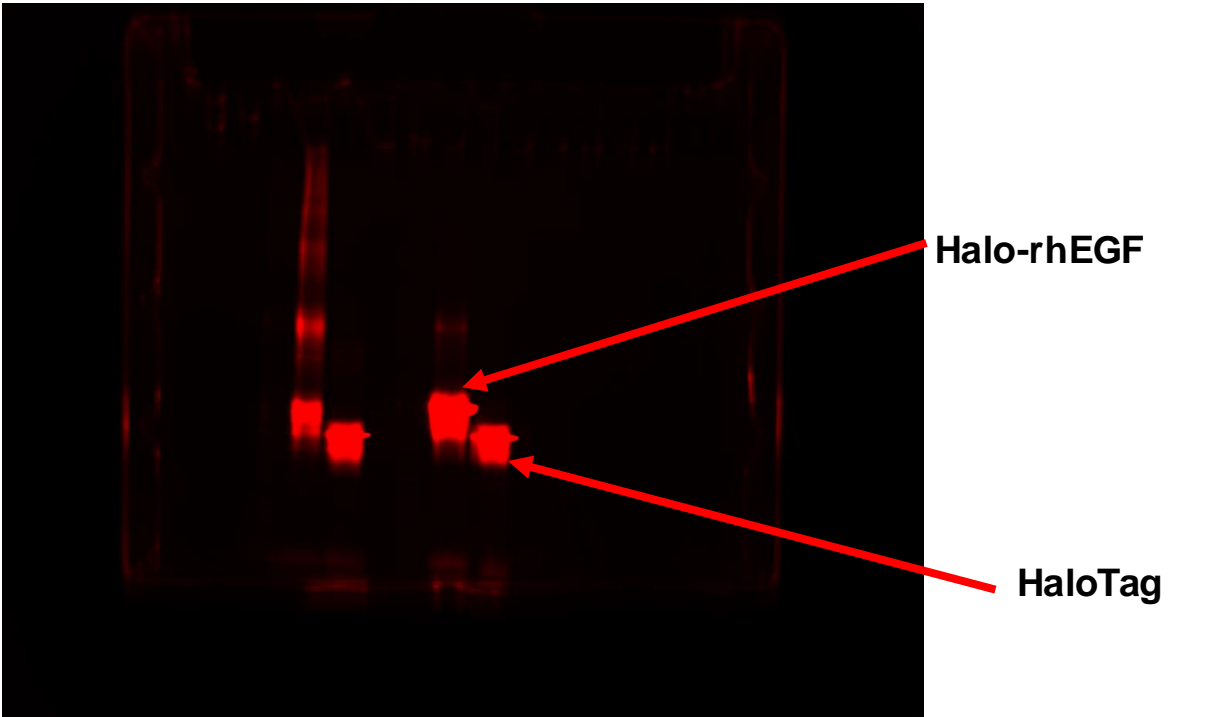

AlexaFluor 660 fluorescence
